# Supplementary material
Source: publisher figshare collection journal article supplement (https://karger.figshare.com/articles/dataset/_/4747918)
Supplement: Supplementary file 2 [file 1]

## Supplementary Table 1. Disease-associated SNPs considered in the present study

A = The phenotypes from the GWAS Catalog are summarized into six categories, namely, the five diseases that show higher prevalence in European populations (this sixth category was used in the Permutation analyses)

B = This column records the Risk Allele Frequency available from the GWAS Catalog. Associations from "non-European GWAS" are labelled as recorded the wrong allele as causal are marked in red (e.g. if 0.76 in red, the Catalog recorded 0.24 as the RAF from the GWAS study)

C = This column indicates if the SNP has been considered for the analysis comparing the RAF between populations

D = Reason for exclusion. "Duplicated" indicates that this SNP is repeated as associated to the same phenotype. Further, some SNPs have been

| Nb | Pubmed   | Author          | Journal                  | Disease (Catalog)                | Disease (assigned) <sup>A</sup> | Pvalue | OR   | OR_text             | SNP - Risk Allele | Chr   |
|----|----------|-----------------|--------------------------|----------------------------------|---------------------------------|--------|------|---------------------|-------------------|-------|
| 1  | 20932310 | Han MR          | BMC Neurol               | AB1-42                           | Other                           | 9E-07  | NR   | NR                  | rs12534221-A      | chr7  |
| 2  | 20932310 | Han MR          | BMC Neurol               | AB1-42                           | Other                           | 2E-09  | NR   | NR                  | rs2899472-A       | chr15 |
| 3  | 22055160 | Bown MJ         | Am J Hum Genet           | Abdominal aortic                 | Other                           | 5E-10  | 1.15 | [1.10-1.21]         | rs1466535-C       | chr12 |
| 4  | 20622881 | Gretarsdottir S | Nat Genet                | Abdominal aortic                 | Other                           | 5E-10  | 1.21 | [1.14-1.28]         | rs7025486-A       | chr9  |
| 5  | 19684603 | Trevino LR      | Nat Genet                | Acute lymphoblastic              | Other                           | 1E-15  | 1.91 | [1.60-2.20]         | rs10821936-C      | chr10 |
| 6  | 19684603 | Trevino LR      | Nat Genet                | Acute lymphoblastic              | Other                           | 9E-06  | 2.55 | [1.60-3.80]         | rs10849033-G      | chr12 |
| 7  | 19684603 | Trevino LR      | Nat Genet                | Acute lymphoblastic              | Other                           | 4E-06  | 1.55 | [1.20-1.80]         | rs10873876-T      | chr1  |
| 8  | 19684603 | Trevino LR      | Nat Genet                | Acute lymphoblastic              | Other                           | 3E-07  | 3.62 | [2.10-6.00]         | rs11155133-G      | chr6  |
| 9  | 19684603 | Trevino LR      | Nat Genet                | Acute lymphoblastic              | Other                           | 8E-11  | 1.69 | [1.40-1.90]         | rs11978267-G      | chr7  |
| 10 | 19684603 | Trevino LR      | Nat Genet                | Acute lymphoblastic              | Other                           | 3E-06  | 1.48 | [1.20-1.70]         | rs12621643-T      | chr2  |
| 11 | 19684603 | Trevino LR      | Nat Genet                | Acute lymphoblastic              | Other                           | 9E-06  | 1.53 | [1.20-1.80]         | rs1879352-C       | chr18 |
| 12 | 19684603 | Trevino LR      | Nat Genet                | Acute lymphoblastic              | Other                           | 7E-06  | 1.52 | [1.20-1.80]         | rs1881797-C       | chr1  |
| 13 | 19684603 | Trevino LR      | Nat Genet                | Acute lymphoblastic              | Other                           | 8E-08  | 2.26 | [1.60-3.0]          | rs2089222-A       | chr12 |
| 14 | 19684603 | Trevino LR      | Nat Genet                | Acute lymphoblastic              | Other                           | 4E-07  | 1.52 | [1.20-1.70]         | rs2191566-G       | chr19 |
| 15 | 19684603 | Trevino LR      | Nat Genet                | Acute lymphoblastic              | Other                           | 9E-06  | 2    | [1.40-2.70]         | rs563507-A        | chr10 |
| 16 | 19684603 | Trevino LR      | Nat Genet                | Acute lymphoblastic              | Other                           | 7E-06  | 1.43 | [1.20-1.60]         | rs6428370-G       | chr1  |
| 17 | 19684603 | Trevino LR      | Nat Genet                | Acute lymphoblastic              | Other                           | 2E-06  | 1.49 | [1.20-1.70]         | rs7554607-A       | chr1  |
| 18 | 19684603 | Trevino LR      | Nat Genet                | Acute lymphoblastic              | Other                           | 6E-06  | 1.58 | [1.20-1.90]         | rs9290663-T       | chr3  |
| 19 | 21700879 | Qi L            | Diabetes                 | Adiponectin levels               | Other                           | 5E-08  | NR   | NR                  | rs10447248-A      | chr5  |
| 20 | 21700879 | Qi L            | Diabetes                 | Adiponectin levels               | Other                           | 5E-06  | NR   | NR                  | rs10517133-C      | chr4  |
| 21 | 21700879 | Qi L            | Diabetes                 | Adiponectin levels               | Other                           | 5E-06  | NR   | NR                  | rs13358260-C      | chr5  |
| 22 | 20018283 | Heid IM         | Atherosclerosis          | Adiponectin levels               | Other                           | 1E-41  | 0.13 | [NR] log(ug/ml)     | rs17366568-G      | chr3  |
| 23 | 21700879 | Qi L            | Diabetes                 | Adiponectin levels               | Other                           | 8E-07  | NR   | NR                  | rs2468677-G       | chr8  |
| 24 | 20876611 | Wu Y            | Hum Mol Genet            | Adiponectin levels               | Other                           | 4E-30  | 0.11 | [0.09-0.13] unit    | rs3865188-T       | chr16 |
| 25 | 19165155 | Ling H          | Obesity (Silver Spring)  | Adiponectin levels               | Other                           | 5E-08  | NR   | NR                  | rs6773957-A       | chr3  |
| 26 | 20876611 | Wu Y            | Hum Mol Genet            | Adiponectin levels               | Other                           | 1E-19  | 0.13 | [0.10-0.16] unit    | rs864265-G        | chr3  |
| 27 | 19557161 | Lindgren CM     | PLoS Genet               | Adiposity                        | Obesity                         | 3E-08  | 0.04 | [0.03-0.05] z-score | rs2605100-G       | chr1  |
| 28 | 21706003 | Kilpelainen TO  | Nat Genet                | Adiposity                        | Obesity                         | 7E-08  | 0.03 | [NR] % decrease     | rs534870-A        | chr13 |
| 29 | 19557161 | Lindgren CM     | PLoS Genet               | Adiposity                        | Obesity                         | 3E-07  | NR   | NR                  | rs6429082-C       | chr1  |
| 30 | 21706003 | Kilpelainen TO  | Nat Genet                | Adiposity                        | Obesity                         | 3E-26  | 0.06 | [NR] % decrease     | rs8050136-C       | chr16 |
| 31 | 19557161 | Lindgren CM     | PLoS Genet               | Adiposity                        | Obesity                         | 2E-11  | 0.04 | [0.03-0.05] z-score | rs987237-G        | chr6  |
| 32 | 21665990 | Yu Y            | Hum Mol Genet            | Age-related macular degeneration | Other                           | 1E-300 | 2.94 | [NR]                | rs10490924-T      | chr10 |
| 33 | 20861866 | Kopplin LJ      | Genes Immun              | Age-related macular degeneration | Other                           | 1E-60  | 2.75 | [NR]                | rs10490924-T      | chr10 |
| 34 | 20385819 | Chen W          | Proc Natl Acad Sci U S A | Age-related macular degeneration | Other                           | 2E-76  | 3.11 | [2.76-3.51]         | rs10737680-A      | chr1  |
| 35 | 20385819 | Chen W          | Proc Natl Acad Sci U S A | Age-related macular degeneration | Other                           | 4E-06  | NR   | NR                  | rs11878133-T      | chr18 |
| 36 | 20385826 | Neale BM        | Proc Natl Acad Sci U S A | Age-related macular degeneration | Other                           | 3E-06  | 1.24 | [1.13-1.35]         | rs13095226-C      | chr3  |
| 37 | 21909106 | Arakawa S       | Nat Genet                | Age-related macular degeneration | Other                           | 2E-08  | 1.3  | [1.19-1.42]         | rs1713985-G       | chr4  |
| 38 | 20385819 | Chen W          | Proc Natl Acad Sci U S A | Age-related macular degeneration | Other                           | 2E-06  | NR   | NR                  | rs2958154-C       | chr12 |
| 39 | 20385819 | Chen W          | Proc Natl Acad Sci U S A | Age-related macular degeneration | Other                           | 1E-07  | 1.14 | [1.09-1.20]         | rs493258-C        | chr15 |
| 40 | 20385826 | Neale BM        | Proc Natl Acad Sci U S A | Age-related macular degeneration | Other                           | 2E-08  | 1.16 | [1.10-1.22]         | rs493258-C        | chr15 |
| 41 | 21782286 | Walter S        | Neurobiol Aging          | Aging (time to event)            | Other                           | 7E-06  | 1.18 | [NR]                | rs3112530-G       | chr5  |
| 42 | 21782286 | Walter S        | Neurobiol Aging          | Aging (time to event)            | Other                           | 6E-06  | 1.17 | [NR]                | rs4764043-T       | chr12 |
| 43 | 19754311 | Le Clerc S      | J Infect Dis             | AIDS                             | Other                           | 4E-06  | 2.13 | [1.56-2.91]         | rs3108919-C       | chr8  |
| 44 | 21665994 | Kutalik Z       | Hum Mol Genet            | Alcohol consumption              | Other                           | 5E-43  | 0.29 | [0.25-0.33] unit    | rs1049296-T       | chr3  |
| 45 | 21270382 | Baik I          | Am J Clin Nutr           | Alcohol consumption              | Other                           | 1E-23  | 0.55 | [0.45-0.65] unit    | rs10849915-G      | chr12 |
| 46 | 21270382 | Baik I          | Am J Clin Nutr           | Alcohol consumption              | Other                           | 4E-35  | 0.79 | [0.67-0.91] unit    | rs12229654-G      | chr12 |
| 47 | 21665994 | Kutalik Z       | Hum Mol Genet            | Alcohol consumption              | Other                           | 2E-17  | 0.29 | [0.22-0.36] unit    | rs1534166-A       | chr3  |
| 48 | 21270382 | Baik I          | Am J Clin Nutr           | Alcohol consumption              | Other                           | 6E-17  | 0.61 | [0.49-0.73] unit    | rs2072134-A       | chr12 |
| 49 | 21270382 | Baik I          | Am J Clin Nutr           | Alcohol consumption              | Other                           | 9E-59  | 1.06 | [0.94-1.18] unit    | rs2074356-T       | chr12 |
| 50 | 21665994 | Kutalik Z       | Hum Mol Genet            | Alcohol consumption              | Other                           | 2E-09  | 0.12 | [0.08-0.16] unit    | rs2749097-G       | chr1  |

|     |          |                 |                   |                     |       |       |      |                 |              |       |
|-----|----------|-----------------|-------------------|---------------------|-------|-------|------|-----------------|--------------|-------|
| 51  | 21471458 | Schumann G      | Proc Natl Acad    | Alcohol consum      | Other | 4E-08 | 0.01 | [0.003-0.028]   | rs6943555-A  | chr7  |
| 52  | 21314694 | Kendler KS      | Alcohol Clin Exp  | Alcohol depend      | Other | 4E-06 | NR   | NR              | rs3738443-A  | chr1  |
| 53  | 21703634 | Wang KS         | J Psychiatr Res   | Alcohol depend      | Other | 2E-07 | NR   | NR              | rs6701037-C  | chr1  |
| 54  | 21314694 | Kendler KS      | Alcohol Clin Exp  | Alcohol depend      | Other | 4E-07 | NR   | NR              | rs6777876-G  | chr3  |
| 55  | 19581569 | Treutlein J     | Arch Gen Psych    | Alcohol depend      | Other | 1E-08 | 1.35 | [1.22-1.49]     | rs7590720-G  | chr2  |
| 56  | 21876473 | Lydall GJ       | Psychiatr Genet   | Alcohol depend      | Other | 4E-06 | NR   | NR              | rs8062326-T  | chr16 |
| 57  | 21529783 | Heath AC        | Biol Psychiatry   | Alcoholism (12-)    | Other | 3E-06 | 0.08 | [NR] unit incre | rs2154294-G  | chr14 |
| 58  | 21529783 | Heath AC        | Biol Psychiatry   | Alcoholism (12-)    | Other | 7E-06 | 0.16 | [NR] unit incre | rs237238-A   | chr7  |
| 59  | 21529783 | Heath AC        | Biol Psychiatry   | Alcoholism (alco    | Other | 6E-06 | 0.08 | [NR] unit decre | rs10253361-T | chr7  |
| 60  | 21529783 | Heath AC        | Biol Psychiatry   | Alcoholism (alco    | Other | 7E-06 | 0.1  | [NR] unit decre | rs933769-T   | chr15 |
| 61  | 21529783 | Heath AC        | Biol Psychiatry   | Alcoholism (hea     | Other | 6E-06 | 0.1  | [NR] unit incre | rs10908907-G | chr9  |
| 62  | 21529783 | Heath AC        | Biol Psychiatry   | Alcoholism (hea     | Other | 9E-06 | 0.15 | [NR] unit incre | rs1380131-C  | chr14 |
| 63  | 21529783 | Heath AC        | Biol Psychiatry   | Alcoholism (hea     | Other | 9E-06 | 0.1  | [NR] unit incre | rs195204-T   | chr1  |
| 64  | 21529783 | Heath AC        | Biol Psychiatry   | Alcoholism (hea     | Other | 2E-06 | 0.14 | [NR] unit decre | rs2369955-A  | chr3  |
| 65  | 22036096 | Ramasamy A      | J Allergy Clin Im | Allergic rhinitis   | Other | 1E-06 | 1.15 | [1.09-1.21]     | rs1044573-A  | chr20 |
| 66  | 22036096 | Ramasamy A      | J Allergy Clin Im | Allergic rhinitis   | Other | 2E-06 | 1.21 | [1.12-1.31]     | rs216518-A   | chr14 |
| 67  | 22036096 | Ramasamy A      | J Allergy Clin Im | Allergic rhinitis   | Other | 1E-06 | 1.23 | [1.13-1.34]     | rs6898653-G  | chr5  |
| 68  | 20596022 | Petukhova L     | Nature            | Alopecia areata     | Other | 1E-35 | 2.21 | [1.98-2.47]     | rs9275572-G  | chr6  |
| 69  | 22159054 | Logue MW        | Arch Neurol       | Alzheimer's dise    | Other | 9E-06 | 1.52 | [1.27-1.84]     | rs10273775-G | chr7  |
| 70  | 22159054 | Logue MW        | Arch Neurol       | Alzheimer's dise    | Other | 5E-06 | 1.75 | [1.37-2.22]     | rs17511627-C | chr13 |
| 71  | 22159054 | Logue MW        | Arch Neurol       | Alzheimer's dise    | Other | 6E-06 | 1.6  | [1.30-1.95]     | rs1923775-T  | chr4  |
| 72  | 17553421 | Reiman EM       | Neuron            | Alzheimer's dise    | Other | 1E-10 | 4.06 | [2.81-14.69]    | rs2373115-G  | chr11 |
| 73  | 21460841 | Naj AC          | Nat Genet         | Alzheimer's dise    | Other | 9E-09 | 1.11 | [1.07-1.15]     | rs9349407-C  | chr6  |
| 74  | 19451621 | Landers JE      | Proc Natl Acad    | Amyotrophic lat     | Other | 3E-06 | 0.79 | [0.46-1.12] yes | rs11241713-T | chr5  |
| 75  | 20801717 | Shatunov A      | Lancet Neurol     | Amyotrophic lat     | Other | 3E-06 | 1.15 | [NR]            | rs1488902-C  | chr11 |
| 76  | 19451621 | Landers JE      | Proc Natl Acad    | Amyotrophic lat     | Other | 8E-06 | 2    | [NR]            | rs16856202-C | chr1  |
| 77  | 19451621 | Landers JE      | Proc Natl Acad    | Amyotrophic lat     | Other | 7E-06 | 3.03 | [1.71-4.35] yes | rs2619566-G  | chr3  |
| 78  | 19451621 | Landers JE      | Proc Natl Acad    | Amyotrophic lat     | Other | 1E-06 | 1.41 | [NR]            | rs7577894-T  | chr2  |
| 79  | 20066004 | Chung CM        | Pharmacogenom     | Angiotensin-con     | Other | 3E-25 | 16.2 | [NR] % varian   | rs4343-G     | chr17 |
| 80  | 22199011 | Murabito JM     | Circ Cardiovasc   | Ankle-brachial ir   | Other | 7E-06 | 0    | [0.0022-0.005   | rs4659996-A  | chr1  |
| 81  | 21743469 | Evans DM        | Nat Genet         | Ankylosing spor     | Other | 1E-06 | NR   | NR              | rs10781500-T | chr9  |
| 82  | 21743469 | Evans DM        | Nat Genet         | Ankylosing spor     | Other | 7E-34 | NR   | NR              | rs10865331-A | chr2  |
| 83  | 20062062 | Reveille JD     | Nat Genet         | Ankylosing spor     | Other | 2E-19 | 1.27 | [1.18-1.37]     | rs10865331-A | chr2  |
| 84  | 21743469 | Evans DM        | Nat Genet         | Ankylosing spor     | Other | 2E-17 | NR   | NR              | rs11209026-G | chr1  |
| 85  | 21743469 | Evans DM        | Nat Genet         | Ankylosing spor     | Other | 9E-11 | NR   | NR              | rs11249215-A | chr1  |
| 86  | 22138694 | Lin Z           | Nat Genet         | Ankylosing spor     | Other | 9E-07 | 1.15 | [1.09-1.22]     | rs13210693-A | chr6  |
| 87  | 20062062 | Reveille JD     | Nat Genet         | Ankylosing spor     | Other | 5E-07 | 1.18 | [1.10-1.27]     | rs2310173-A  | chr2  |
| 88  | 21743469 | Evans DM        | Nat Genet         | Ankylosing spor     | Other | 2E-11 | NR   | NR              | rs378108-G   | chr21 |
| 89  | 22138694 | Lin Z           | Nat Genet         | Ankylosing spor     | Other | 9E-10 | 1.21 | [1.14-1.29]     | rs4552569-C  | chr5  |
| 90  | 21743469 | Evans DM        | Nat Genet         | Ankylosing spor     | Other | 5E-08 | NR   | NR              | rs8070463-C  | chr17 |
| 91  | 22216198 | Athanasiadis G  | PLoS One          | Anticoagulant le    | Other | 4E-09 | 0.85 | [NR] SD units   | rs867186-G   | chr20 |
| 92  | 19584346 | Vasan RS        | JAMA              | Aortic root size    | Other | 2E-08 | 0.03 | [0.02-0.04] cm  | rs10770612-G | chr12 |
| 93  | 20031579 | Tarasov KV      | Circ Cardiovasc   | Arterial stiffness  | Other | 5E-08 | 21   | [11.79-30.21]   | rs3742207-C  | chr13 |
| 94  | 21804548 | Hirota T        | Nat Genet         | Asthma              | Other | 1E-16 | 1.17 | [1.13-1.22]     | rs1837253-C  | chr5  |
| 95  | 21804548 | Hirota T        | Nat Genet         | Asthma              | Other | 1E-10 | 1.15 | [1.10-1.20]     | rs2069408-C  | chr12 |
| 96  | 20860503 | Moffatt MF      | N Engl J Med      | Asthma              | Other | 1E-08 | 1.12 | [1.08-1.16]     | rs2284033-G  | chr22 |
| 97  | 21907864 | Ferreira MA     | Lancet            | Asthma              | Other | 2E-08 | 1.09 | [1.06-1.12]     | rs4129267-T  | chr1  |
| 98  | 21150878 | Ferreira MA     | Eur J Hum Gen     | Asthma              | Other | 5E-07 | 1.33 | [NR]            | rs6503525-C  | chr17 |
| 99  | 21907864 | Ferreira MA     | Lancet            | Asthma              | Other | 2E-08 | 1.09 | [1.06-1.13]     | rs7130588-G  | chr11 |
| 100 | 20860503 | Moffatt MF      | N Engl J Med      | Asthma              | Other | 4E-09 | 1.12 | [1.09-1.16]     | rs744910-G   | chr15 |
| 101 | 21804548 | Hirota T        | Nat Genet         | Asthma              | Other | 5E-15 | 1.17 | [1.12-1.21]     | rs7775228-A  | chr6  |
| 102 | 19187332 | Kim SH          | Clin Exp Allergy  | Asthma (toluene     | Other | 7E-06 | 5.29 | [2.41-11.61]    | rs16937883-G | chr9  |
| 103 | 19187332 | Kim SH          | Clin Exp Allergy  | Asthma (toluene     | Other | 3E-06 | 5.2  | [2.47-10.92]    | rs9319321-T  | chr13 |
| 104 | 22197932 | Paternoster L   | Nat Genet         | Atopic dermatitis   | Other | 6E-06 | 1.09 | [1.05-1.13]     | rs4821544-C  | chr22 |
| 105 | 19349984 | Esparza-Gordill | Nat Genet         | Atopic dermatitis   | Other | 8E-10 | 1.22 | [1.15-1.30]     | rs7927894-A  | chr11 |
| 106 | 20173747 | Ellinor PT      | Nat Genet         | Atrial fibrillation | Other | 2E-21 | 1.52 | [1.40-1.64]     | rs13376333-T | chr1  |
| 107 | 19597492 | Benjamin EJ     | Nat Genet         | Atrial fibrillation | Other | 4E-63 | 1.65 |                 | rs17042171-A | chr4  |
| 108 | 19597492 | Benjamin EJ     | Nat Genet         | Atrial fibrillation | Other | 2E-15 | 1.25 |                 | rs2106261-T  | chr16 |
| 109 | 20173747 | Ellinor PT      | Nat Genet         | Atrial fibrillation | Other | 3E-28 | 2.03 | [1.79-2.30]     | rs6843082-G  | chr4  |
| 110 | 19597491 | Gudbjartsson D  | Nat Genet         | Atrial fibrillation | Other | 1E-10 | 1.21 | [1.14-1.29]     | rs7193343-T  | chr16 |
| 111 | 17603472 | Gudbjartsson D  | Nature            | Atrial fibrillation | Other | 3E-41 | 1.72 | [1.59-1.86]     | rs2200733-T  | chr4  |
| 112 | 21041692 | Denny JC        | Circulation       | Atrioventricular    | Other | 5E-06 | 2.45 | [1.41-3.49] ms  | rs470490-G   | chr18 |
| 113 | 21041692 | Denny JC        | Circulation       | Atrioventricular    | Other | 6E-06 | 2.42 | [1.36-3.48] ms  | rs7602460-A  | chr2  |
| 114 | 18821564 | Mick E          | Am J Med Gene     | Attention deficit   | Other | 3E-06 | NR   | NR              | rs11134178-T | chr5  |
| 115 | 20732626 | Mick E          | J Am Acad Child   | Attention deficit   | Other | 4E-06 | 1.42 | [NR]            | rs2602381-A  | chr2  |
| 116 | 18821564 | Mick E          | Am J Med Gene     | Attention deficit   | Other | 3E-06 | NR   | NR              | rs9627183-C  | chr22 |
| 117 | 18937294 | Lasky-Su J      | Am J Med Gene     | Attention deficit   | Other | 8E-06 | NR   | NR              | rs1335515-C  | chr14 |
| 118 | 18937294 | Lasky-Su J      | Am J Med Gene     | Attention deficit   | Other | 4E-06 | NR   | NR              | rs9845475-G  | chr3  |
| 119 | 18951430 | Anney RJ        | Am J Med Gene     | Attention deficit   | Other | 5E-06 | NR   | NR              | rs10229603-C | chr7  |
| 120 | 18951430 | Anney RJ        | Am J Med Gene     | Attention deficit   | Other | 1E-06 | NR   | NR              | rs10492664-C | chr13 |
| 121 | 18951430 | Anney RJ        | Am J Med Gene     | Attention deficit   | Other | 2E-06 | NR   | NR              | rs10831284-G | chr11 |
| 122 | 18951430 | Anney RJ        | Am J Med Gene     | Attention deficit   | Other | 6E-06 | NR   | NR              | rs1381102-A  | chr16 |
| 123 | 18951430 | Anney RJ        | Am J Med Gene     | Attention deficit   | Other | 9E-06 | NR   | NR              | rs2764980-A  | chr10 |
| 124 | 18951430 | Anney RJ        | Am J Med Gene     | Attention deficit   | Other | 2E-06 | NR   | NR              | rs2826340-T  | chr21 |
| 125 | 18951430 | Anney RJ        | Am J Med Gene     | Attention deficit   | Other | 6E-06 | NR   | NR              | rs7236632-A  | chr18 |
| 126 | 18951430 | Anney RJ        | Am J Med Gene     | Attention deficit   | Other | 4E-06 | NR   | NR              | rs7297018-A  | chr12 |

|     |          |                |                 |                   |       |        |      |                |            |              |       |
|-----|----------|----------------|-----------------|-------------------|-------|--------|------|----------------|------------|--------------|-------|
| 127 | 18951430 | Anney RJ       | Am J Med Genet  | Attention deficit | Other | 5E-06  | NR   | NR             |            | rs931812-C   | chr8  |
| 128 | 18846501 | Sonuga-Barke E | Am J Med Genet  | Attention deficit | Other | 8E-06  | 0.6  | [NR]           | unit incre | rs10049246-G | chr3  |
| 129 | 19404256 | Wang K         | Nature          | Autism            | Other | 2E-10  | 1.19 | [NR]           |            | rs4307059-T  | chr5  |
| 130 | 21700618 | Nan H          | Hum Mol Genet   | Basal cell carcin | Other | 1E-09  | 1.24 | [1.17-1.31]    |            | rs12210050-T | chr6  |
| 131 | 20460270 | Garcia-Barcelo | Hum Mol Genet   | Biliary atresia   | Other | 7E-09  | 1.77 | [1.38-2.26]    |            | rs17095355-T | chr10 |
| 132 | 20460270 | Garcia-Barcelo | Hum Mol Genet   | Biliary atresia   | Other | 9E-06  | 2.14 | [1.58-2.89]    |            | rs2120991-A  | chr12 |
| 133 | 20460270 | Garcia-Barcelo | Hum Mol Genet   | Biliary atresia   | Other | 2E-06  | 2.95 | [1.89-4.60]    |            | rs9314986-G  | chr13 |
| 134 | 22085899 | Chen G         | Eur J Hum Genet | Bilirubin levels  | Other | 9E-06  | 0.12 | [0.067-0.172]  |            | rs11208446-A | chr1  |
| 135 | 22085899 | Chen G         | Eur J Hum Genet | Bilirubin levels  | Other | 7E-06  | 0.21 | [0.12-0.304]   | um         | rs11843309-T | chr13 |
| 136 | 22085899 | Chen G         | Eur J Hum Genet | Bilirubin levels  | Other | 7E-06  | 0.22 | [0.127-0.321]  |            | rs12052359-A | chr2  |
| 137 | 19414484 | Johnson AD     | Hum Mol Genet   | Bilirubin levels  | Other | 2E-06  | 0.02 | [0.00-0.04]    | um         | rs1986655-A  | chr4  |
| 138 | 22085899 | Chen G         | Eur J Hum Genet | Bilirubin levels  | Other | 4E-06  | 0.19 | [0.112-0.276]  |            | rs2135319-A  | chr3  |
| 139 | 19414484 | Johnson AD     | Hum Mol Genet   | Bilirubin levels  | Other | 7E-13  | 0.05 | [0.03-0.07]    | um         | rs4149056-C  | chr12 |
| 140 | 22085899 | Chen G         | Eur J Hum Genet | Bilirubin levels  | Other | 2E-06  | 0.16 | [0.097-0.229]  |            | rs4781563-A  | chr16 |
| 141 | 19414484 | Johnson AD     | Hum Mol Genet   | Bilirubin levels  | Other | 1E-300 | 0.23 | [0.21-0.25]    | um         | rs6742078-T  | chr2  |
| 142 | 22085899 | Chen G         | Eur J Hum Genet | Bilirubin levels  | Other | 2E-22  | 0.23 | [0.183-0.270]  |            | rs887829-T   | chr2  |
| 143 | 19419973 | Sanna S        | Hum Mol Genet   | Bilirubin levels  | Other | 1E-69  | 0.57 | [0.50-0.63]    | g/L        | rs887829-T   | chr2  |
| 144 | 19260141 | Zemunik T      | Croat Med J     | Biochemical me    | Other | 5E-06  | 0.24 | [0.14-0.34]    | mm         | rs10777332-A | chr12 |
| 145 | 19260141 | Zemunik T      | Croat Med J     | Biochemical me    | Other | 8E-06  | 0.13 | [0.08-0.18]    | mm         | rs2839619-G  | chr21 |
| 146 | 19260141 | Zemunik T      | Croat Med J     | Biochemical me    | Other | 8E-06  | 0.13 | [0.07-0.19]    | mm         | rs2839619-G  | chr21 |
| 147 | 19260141 | Zemunik T      | Croat Med J     | Biochemical me    | Other | 8E-06  | 0.23 | [0.13-0.33]    | g/L        | rs6044777-A  | chr20 |
| 148 | 19396169 | Cho YS         | Nat Genet       | Biomedical quar   | Other | 2E-09  | 0.66 | [0.45-0.87]    | be         | rs12110693-A | chr6  |
| 149 | 19396169 | Cho YS         | Nat Genet       | Biomedical quar   | Other | 3E-09  | 1.09 | [0.72-1.44]    | be         | rs12731740-T | chr1  |
| 150 | 19396169 | Cho YS         | Nat Genet       | Biomedical quar   | Other | 3E-06  | 0.63 | [0.37-0.89]    | mm         | rs17249754-A | chr12 |
| 151 | 19396169 | Cho YS         | Nat Genet       | Biomedical quar   | Other | 1E-07  | 1.06 | [0.67-1.45]    | mm         | rs17249754-A | chr12 |
| 152 | 19396169 | Cho YS         | Nat Genet       | Biomedical quar   | Other | 8E-12  | 0.01 | [0.004-0.008]  |            | rs2074356-T  | chr12 |
| 153 | 19396169 | Cho YS         | Nat Genet       | Biomedical quar   | Other | 2E-06  | NR   | NR             |            | rs7776725-C  | chr7  |
| 154 | 19396169 | Cho YS         | Nat Genet       | Biomedical quar   | Other | 1E-11  | NR   | NR             |            | rs7776725-C  | chr7  |
| 155 | 19396169 | Cho YS         | Nat Genet       | Biomedical quar   | Other | 2E-07  | 0.24 | [0.14-0.32]    | kg         | rs9939609-A  | chr16 |
| 156 | 18711365 | Ferreira MA    | Nat Genet       | Bipolar disorder  | Other | 7E-08  | 1.18 | [NR]           |            | rs1006737-A  | chr12 |
| 157 | 17554300 | WTCCC          | Nature          | Bipolar disorder  | Other | 7E-06  | 1.45 | [1.24-1.68]    |            | rs10134944-T | chr14 |
| 158 | 21738484 | Smith EN       | PLoS Genet      | Bipolar disorder  | Other | 9E-06  | 1.27 | [NR]           |            | rs1038094-G  | chr15 |
| 159 | 19416921 | Scott LJ       | Proc Natl Acad  | Bipolar disorder  | Other | 2E-07  | 1.19 | [1.11-1.27]    |            | rs1042779-A  | chr3  |
| 160 | 21353194 | Cichon S       | Am J Hum Genet  | Bipolar disorder  | Other | 2E-09  | 1.17 | [NR]           |            | rs1064395-A  | chr19 |
| 161 | 17554300 | WTCCC          | Nature          | Bipolar disorder  | Other | 8E-06  | 1.13 | [0.89-1.44]    |            | rs11622475-C | chr14 |
| 162 | 18711365 | Ferreira MA    | Nat Genet       | Bipolar disorder  | Other | 4E-06  | 1.2  | [NR]           |            | rs12290811-A | chr11 |
| 163 | 18711365 | Ferreira MA    | Nat Genet       | Bipolar disorder  | Other | 5E-06  | 1.3  | [NR]           |            | rs12436436-C | chr14 |
| 164 | 21926972 | Sklar P        | Nat Genet       | Bipolar disorder  | Other | 3E-06  | 1.1  | [NR]           |            | rs12912251-G | chr15 |
| 165 | 21738484 | Smith EN       | PLoS Genet      | Bipolar disorder  | Other | 2E-06  | 1.17 | [NR]           |            | rs17197037-A | chr14 |
| 166 | 19488044 | Smith EN       | Mol Psychiatry  | Bipolar disorder  | Other | 2E-06  | 1.74 | [NR]           |            | rs2111504-T  | chr19 |
| 167 | 18711365 | Ferreira MA    | Nat Genet       | Bipolar disorder  | Other | 4E-06  | 1.15 | [NR]           |            | rs216345-T   | chr9  |
| 168 | 20386566 | Lee MT         | Mol Psychiatry  | Bipolar disorder  | Other | 5E-07  | 1.44 | [1.25-1.66]    | G          | rs2709736-G  | chr7  |
| 169 | 17554300 | WTCCC          | Nature          | Bipolar disorder  | Other | 7E-06  | 1.84 | [1.31-2.58]    |            | rs2953145-C  | chr2  |
| 170 | 21738484 | Smith EN       | PLoS Genet      | Bipolar disorder  | Other | 3E-06  | 1.16 | [NR]           |            | rs2989476-C  | chr1  |
| 171 | 17554300 | WTCCC          | Nature          | Bipolar disorder  | Other | 7E-06  | 1.03 | [1.15-1.23]    |            | rs3761218-C  | chr20 |
| 172 | 21926972 | Sklar P        | Nat Genet       | Bipolar disorder  | Other | 2E-06  | 1.1  | [NR]           |            | rs3845817-T  | chr2  |
| 173 | 17554300 | WTCCC          | Nature          | Bipolar disorder  | Other | 6E-08  | 2.08 | [1.60-2.71]    |            | rs420259-A   | chr16 |
| 174 | 22182935 | Chen DT        | Mol Psychiatry  | Bipolar disorder  | Other | 8E-09  | NR   | NR             |            | rs4650608-T  | chr1  |
| 175 | 21738484 | Smith EN       | PLoS Genet      | Bipolar disorder  | Other | 9E-06  | 1.59 | [NR]           |            | rs4770394-A  | chr13 |
| 176 | 18711365 | Ferreira MA    | Nat Genet       | Bipolar disorder  | Other | 6E-06  | 1.22 | [NR]           |            | rs544368-T   | chr11 |
| 177 | 19416921 | Scott LJ       | Proc Natl Acad  | Bipolar disorder  | Other | 7E-06  | 1.23 | [1.13-1.35]    |            | rs6494849-A  | chr15 |
| 178 | 21926972 | Sklar P        | Nat Genet       | Bipolar disorder  | Other | 2E-06  | 1.1  | [NR]           |            | rs6746896-A  | chr2  |
| 179 | 17554300 | WTCCC          | Nature          | Bipolar disorder  | Other | 5E-06  | 1.47 | [1.26-1.71]    |            | rs683395-G   | chr3  |
| 180 | 21738484 | Smith EN       | PLoS Genet      | Bipolar disorder  | Other | 9E-06  | 1.23 | [NR]           |            | rs7747960-A  | chr6  |
| 181 | 18711365 | Ferreira MA    | Nat Genet       | Bipolar disorder  | Other | 5E-06  | 1.59 | [NR]           |            | rs8015959-T  | chr14 |
| 182 | 21926972 | Sklar P        | Nat Genet       | Bipolar disorder  | Other | 7E-07  | 1.1  | [NR]           |            | rs9371601-T  | chr6  |
| 183 | 22182935 | Chen DT        | Mol Psychiatry  | Bipolar disorder  | Other | 1E-12  | NR   | NR             |            | rs9834970-C  | chr3  |
| 184 | 20351715 | Liu Y          | Mol Psychiatry  | Bipolar disorder  | Other | 3E-08  | 1.18 | [NR] (bipolar) |            | rs1006737-A  | chr12 |
| 185 | 20351715 | Liu Y          | Mol Psychiatry  | Bipolar disorder  | Other | 1E-06  | NR   | NR             |            | rs12912251-T | chr15 |
| 186 | 20889312 | Wang KS        | Schizophr Res   | Bipolar disorder  | Other | 7E-07  | 1.39 | [NR]           |            | rs10496702-G | chr2  |
| 187 | 20889312 | Wang KS        | Schizophr Res   | Bipolar disorder  | Other | 4E-06  | 1.37 | [NR]           |            | rs10929808-G | chr2  |
| 188 | 20889312 | Wang KS        | Schizophr Res   | Bipolar disorder  | Other | 1E-07  | 1.27 | [NR]           |            | rs10949808-T | chr7  |
| 189 | 20889312 | Wang KS        | Schizophr Res   | Bipolar disorder  | Other | 2E-06  | 1.23 | [NR]           |            | rs11042937-T | chr11 |
| 190 | 20889312 | Wang KS        | Schizophr Res   | Bipolar disorder  | Other | 3E-06  | 1.89 | [NR]           |            | rs11072089-C | chr15 |
| 191 | 20889312 | Wang KS        | Schizophr Res   | Bipolar disorder  | Other | 2E-06  | 1.24 | [NR]           |            | rs1107592-T  | chr7  |
| 192 | 20889312 | Wang KS        | Schizophr Res   | Bipolar disorder  | Other | 4E-06  | 1.25 | [NR]           |            | rs11097407-G | chr4  |
| 193 | 20889312 | Wang KS        | Schizophr Res   | Bipolar disorder  | Other | 3E-06  | 1.23 | [NR]           |            | rs11239177-T | chr10 |
| 194 | 20889312 | Wang KS        | Schizophr Res   | Bipolar disorder  | Other | 1E-06  | 1.56 | [NR]           |            | rs11740562-C | chr5  |
| 195 | 20889312 | Wang KS        | Schizophr Res   | Bipolar disorder  | Other | 6E-09  | 1.29 | [NR]           |            | rs11789399-G | chr9  |
| 196 | 20889312 | Wang KS        | Schizophr Res   | Bipolar disorder  | Other | 2E-06  | 1.44 | [NR]           |            | rs11880706-G | chr19 |
| 197 | 20889312 | Wang KS        | Schizophr Res   | Bipolar disorder  | Other | 4E-08  | 1.31 | [NR]           |            | rs12201676-C | chr6  |
| 198 | 20889312 | Wang KS        | Schizophr Res   | Bipolar disorder  | Other | 1E-06  | 1.67 | [NR]           |            | rs12282742-A | chr11 |
| 199 | 20889312 | Wang KS        | Schizophr Res   | Bipolar disorder  | Other | 8E-07  | 1.25 | [NR]           |            | rs12745968-T | chr1  |
| 200 | 20889312 | Wang KS        | Schizophr Res   | Bipolar disorder  | Other | 1E-06  | 2.33 | [NR]           |            | rs17069122-T | chr6  |
| 201 | 20889312 | Wang KS        | Schizophr Res   | Bipolar disorder  | Other | 3E-06  | 2.41 | [NR]           |            | rs17111920-A | chr14 |
| 202 | 20889312 | Wang KS        | Schizophr Res   | Bipolar disorder  | Other | 1E-06  | 1.44 | [NR]           |            | rs1806864-C  | chr9  |

|     |          |                |                   |                  |         |        |      |              |           |              |       |
|-----|----------|----------------|-------------------|------------------|---------|--------|------|--------------|-----------|--------------|-------|
| 203 | 20889312 | Wang KS        | Schizophr Res     | Bipolar disorder | Other   | 2E-07  | 1.56 | [NR]         |           | rs1992045-T  | chr8  |
| 204 | 20889312 | Wang KS        | Schizophr Res     | Bipolar disorder | Other   | 1E-06  | 1.24 | [NR]         |           | rs2018368-G  | chr11 |
| 205 | 20889312 | Wang KS        | Schizophr Res     | Bipolar disorder | Other   | 5E-07  | 1.3  | [NR]         |           | rs2044417-C  | chr13 |
| 206 | 20889312 | Wang KS        | Schizophr Res     | Bipolar disorder | Other   | 2E-06  | 1.31 | [NR]         |           | rs240444-A   | chr21 |
| 207 | 20889312 | Wang KS        | Schizophr Res     | Bipolar disorder | Other   | 2E-07  | 1.27 | [NR]         |           | rs2509843-C  | chr11 |
| 208 | 20889312 | Wang KS        | Schizophr Res     | Bipolar disorder | Other   | 2E-06  | 1.24 | [NR]         |           | rs252817-G   | chr5  |
| 209 | 20889312 | Wang KS        | Schizophr Res     | Bipolar disorder | Other   | 3E-06  | 2.09 | [NR]         |           | rs2774292-A  | chr1  |
| 210 | 20889312 | Wang KS        | Schizophr Res     | Bipolar disorder | Other   | 1E-06  | 1.36 | [NR]         |           | rs2841307-T  | chr6  |
| 211 | 20889312 | Wang KS        | Schizophr Res     | Bipolar disorder | Other   | 3E-06  | 1.28 | [NR]         |           | rs435746-A   | chr16 |
| 212 | 20889312 | Wang KS        | Schizophr Res     | Bipolar disorder | Other   | 3E-06  | 1.23 | [NR]         |           | rs493187-G   | chr6  |
| 213 | 20889312 | Wang KS        | Schizophr Res     | Bipolar disorder | Other   | 4E-07  | 1.28 | [NR]         |           | rs4949526-T  | chr1  |
| 214 | 20889312 | Wang KS        | Schizophr Res     | Bipolar disorder | Other   | 1E-07  | 1.28 | [NR]         |           | rs4996815-C  | chr13 |
| 215 | 20889312 | Wang KS        | Schizophr Res     | Bipolar disorder | Other   | 1E-06  | 1.24 | [NR]         |           | rs6024905-C  | chr20 |
| 216 | 20889312 | Wang KS        | Schizophr Res     | Bipolar disorder | Other   | 4E-07  | 1.28 | [NR]         |           | rs6046396-G  | chr20 |
| 217 | 20889312 | Wang KS        | Schizophr Res     | Bipolar disorder | Other   | 6E-07  | 1.33 | [NR]         |           | rs6444931-T  | chr3  |
| 218 | 20889312 | Wang KS        | Schizophr Res     | Bipolar disorder | Other   | 2E-06  | 1.25 | [NR]         |           | rs6952808-C  | chr7  |
| 219 | 20889312 | Wang KS        | Schizophr Res     | Bipolar disorder | Other   | 1E-06  | 1.3  | [NR]         |           | rs7248363-G  | chr19 |
| 220 | 20889312 | Wang KS        | Schizophr Res     | Bipolar disorder | Other   | 4E-06  | 1.25 | [NR]         |           | rs7319311-A  | chr13 |
| 221 | 20889312 | Wang KS        | Schizophr Res     | Bipolar disorder | Other   | 3E-06  | 1.23 | [NR]         |           | rs7386474-C  | chr8  |
| 222 | 20889312 | Wang KS        | Schizophr Res     | Bipolar disorder | Other   | 2E-06  | 1.29 | [NR]         |           | rs7512769-T  | chr1  |
| 223 | 20889312 | Wang KS        | Schizophr Res     | Bipolar disorder | Other   | 4E-06  | 1.3  | [NR]         |           | rs7533906-G  | chr1  |
| 224 | 20889312 | Wang KS        | Schizophr Res     | Bipolar disorder | Other   | 1E-06  | 1.31 | [NR]         |           | rs7727102-G  | chr5  |
| 225 | 20889312 | Wang KS        | Schizophr Res     | Bipolar disorder | Other   | 2E-06  | 2.26 | [NR]         |           | rs7799181-C  | chr7  |
| 226 | 20889312 | Wang KS        | Schizophr Res     | Bipolar disorder | Other   | 2E-07  | 2.03 | [NR]         |           | rs802568-C   | chr7  |
| 227 | 20889312 | Wang KS        | Schizophr Res     | Bipolar disorder | Other   | 2E-06  | 1.23 | [NR]         |           | rs915071-A   | chr14 |
| 228 | 20889312 | Wang KS        | Schizophr Res     | Bipolar disorder | Other   | 2E-06  | 1.34 | [NR]         |           | rs9377619-G  | chr6  |
| 229 | 20889312 | Wang KS        | Schizophr Res     | Bipolar disorder | Other   | 4E-06  | 1.62 | [NR]         |           | rs992564-G   | chr11 |
| 230 | 20889312 | Wang KS        | Schizophr Res     | Bipolar disorder | Other   | 1E-06  | 1.28 | [NR]         |           | rs993804-C   | chr3  |
| 231 | 18483556 | Han J          | PLoS Genet        | Black vs. blond  | Other   | 4E-103 | 0.44 | [0.40-0.48]  | de        | rs12913832-A | chr15 |
| 232 | 18483556 | Han J          | PLoS Genet        | Black vs. red ha | Other   | 1E-77  | 0.44 | [0.40-0.48]  | de        | rs12913832-A | chr15 |
| 233 | 18483556 | Han J          | PLoS Genet        | Black vs. red ha | Other   | 2E-23  | 0.36 | [0.28-0.44]  | inc       | rs258322-T   | chr16 |
| 234 | 20972438 | Rothman N      | Nat Genet         | Bladder cancer   | Other   | 5E-07  | 1.11 | [1.07-1.16]  |           | rs401681-C   | chr5  |
| 235 | 20972438 | Rothman N      | Nat Genet         | Bladder cancer   | Other   | 4E-13  | 1.2  | [1.14-1.26]  |           | rs798766-T   | chr4  |
| 236 | 20972438 | Rothman N      | Nat Genet         | Bladder cancer   | Other   | 2E-18  | 1.21 | [1.16-1.27]  |           | rs9642880-T  | chr8  |
| 237 | 21106707 | Gu J           | Hum Mol Genet     | Bleomycin sens   | Other   | 3E-08  | 0.18 | [0.12-0.24]  | mc        | rs8093763-A  | chr18 |
| 238 | 17952075 | Sulem P        | Nat Genet         | Blond vs. brown  | Other   | 4E-30  | 2.32 | [1.86-2.92]  |           | rs12821256-C | chr12 |
| 239 | 21572416 | Kato N         | Nat Genet         | Blood pressure   | Other   | 8E-31  | 1.56 | [1.31-1.81]  | mr        | rs11066280-T | chr12 |
| 240 | 21572416 | Kato N         | Nat Genet         | Blood pressure   | Other   | 1E-35  | 1.01 | [0.85-1.17]  | mr        | rs11066280-T | chr12 |
| 241 | 21909110 | Wain LV        | Nat Genet         | Blood pressure   | Other   | 8E-11  | 0.53 | [0.37-0.69]  | mr        | rs11191548-T | chr10 |
| 242 | 21572416 | Kato N         | Nat Genet         | Blood pressure   | Other   | 7E-12  | 0.58 | [0.42-0.74]  | mr        | rs11191548-T | chr10 |
| 243 | 21572416 | Kato N         | Nat Genet         | Blood pressure   | Other   | 4E-17  | 1.18 | [0.91-1.45]  | mr        | rs11191548-T | chr10 |
| 244 | 21909110 | Wain LV        | Nat Genet         | Blood pressure   | Other   | 2E-11  | 0.34 | [0.24-0.44]  | mr        | rs11222084-T | chr11 |
| 245 | 21909110 | Wain LV        | Nat Genet         | Blood pressure   | Other   | 4E-09  | 0.28 | [0.19-0.37]  | mr        | rs1173771-G  | chr5  |
| 246 | 21909110 | Wain LV        | Nat Genet         | Blood pressure   | Other   | 5E-09  | 0.28 | [0.18-0.37]  | mr        | rs1173771-G  | chr5  |
| 247 | 21909110 | Wain LV        | Nat Genet         | Blood pressure   | Other   | 2E-07  | 0.25 | [0.16-0.35]  | mr        | rs12940887-T | chr17 |
| 248 | 21909110 | Wain LV        | Nat Genet         | Blood pressure   | Other   | 2E-08  | 0.31 | [0.20-0.42]  | mr        | rs13002573-G | chr2  |
| 249 | 21909110 | Wain LV        | Nat Genet         | Blood pressure   | Other   | 4E-08  | 0.26 | [0.17-0.35]  | mr        | rs1327235-G  | chr20 |
| 250 | 21909110 | Wain LV        | Nat Genet         | Blood pressure   | Other   | 2E-15  | 0.39 | [0.29-0.48]  | mr        | rs1378942-C  | chr15 |
| 251 | 21909110 | Wain LV        | Nat Genet         | Blood pressure   | Other   | 6E-10  | 0.39 | [0.27-0.52]  | mr        | rs17249754-G | chr12 |
| 252 | 21909110 | Wain LV        | Nat Genet         | Blood pressure   | Other   | 1E-17  | 0.56 | [0.43-0.69]  | mr        | rs17249754-G | chr12 |
| 253 | 21572416 | Kato N         | Nat Genet         | Blood pressure   | Other   | 8E-20  | 1.17 | [0.92-1.42]  | mr        | rs17249754-G | chr12 |
| 254 | 21572416 | Kato N         | Nat Genet         | Blood pressure   | Other   | 2E-13  | 0.58 | [0.42-0.74]  | mr        | rs17249754-G | chr12 |
| 255 | 21909110 | Wain LV        | Nat Genet         | Blood pressure   | Other   | 2E-16  | 0.53 | [0.40-0.66]  | mr        | rs17367504-G | chr1  |
| 256 | 21909110 | Wain LV        | Nat Genet         | Blood pressure   | Other   | 4E-06  | 0.23 | [0.13-0.32]  | mr        | rs2384550-G  | chr12 |
| 257 | 21572416 | Kato N         | Nat Genet         | Blood pressure   | Other   | 8E-07  | 0.63 | [0.38-0.88]  | mr        | rs35444-A    | chr12 |
| 258 | 21572416 | Kato N         | Nat Genet         | Blood pressure   | Other   | 1E-10  | 0.5  | [0.34-0.66]  | mr        | rs35444-A    | chr12 |
| 259 | 21909110 | Wain LV        | Nat Genet         | Blood pressure   | Other   | 8E-07  | 0.3  | [0.18-0.42]  | mr        | rs3774372-T  | chr3  |
| 260 | 21909110 | Wain LV        | Nat Genet         | Blood pressure   | Other   | 7E-20  | 0.43 | [0.34-0.52]  | mr        | rs653178-T   | chr12 |
| 261 | 21909110 | Wain LV        | Nat Genet         | Blood pressure   | Other   | 4E-07  | 0.38 | [0.23-0.53]  | mr        | rs7129220-G  | chr11 |
| 262 | 21909110 | Wain LV        | Nat Genet         | Blood pressure   | Other   | 1E-11  | 0.34 | [0.24-0.44]  | mr        | rs9313772-T  | chr5  |
| 263 | 21909110 | Wain LV        | Nat Genet         | Blood pressure   | Other   | 5E-09  | 0.27 | [0.18-0.36]  | mr        | rs9663362-G  | chr10 |
| 264 | 17952075 | Sulem P        | Nat Genet         | Blue vs. green e | Other   | 3E-12  | 1.52 | [1.28-1.81]  |           | rs1393350-A  | chr11 |
| 265 | 18488028 | Sulem P        | Nat Genet         | Blue vs. green e | Other   | 6E-17  | 1.4  | [1.25-1.57]  |           | rs1408799-C  | chr9  |
| 266 | 19268274 | Liu XG         | Am J Hum Genet    | Body mass (lean  | Other   | 4E-10  | 0.1  | [0.04-0.16]  | kg        | rs7832552-T  | chr8  |
| 267 | 21037115 | Wan ES         | Am J Respir Ce    | Body mass in ch  | Other   | 4E-08  | NR   | NR           |           | rs8050136-A  | chr16 |
| 268 | 19851299 | Johansson A    | Obesity (Silver S | Body mass inde   | Obesity | 6E-06  | 0.12 | [NR]         | kg increa | rs1024889-G  | chr3  |
| 269 | 19079261 | Willer CJ      | Nat Genet         | Body mass inde   | Obesity | 1E-06  | NR   | NR           |           | rs10769908-C | chr11 |
| 270 | 19079261 | Willer CJ      | Nat Genet         | Body mass inde   | Obesity | 2E-08  | 0.06 | [-0.01-0.13] | kg        | rs11084753-G | chr19 |
| 271 | 19079261 | Willer CJ      | Nat Genet         | Body mass inde   | Obesity | 7E-06  | NR   | NR           |           | rs12324805-C | chr15 |
| 272 | 19851299 | Johansson A    | Obesity (Silver S | Body mass inde   | Obesity | 6E-06  | 0.16 | [NR]         | kg decrea | rs12517906-G | chr5  |
| 273 | 20966902 | Croteau-Chonka | Obesity (Silver S | Body mass inde   | Obesity | 4E-06  | 0.06 | [0.04-0.08]  | un        | rs1440072-C  | chr2  |
| 274 | 20935630 | Speliotes EK   | Nat Genet         | Body mass inde   | Obesity | 8E-14  | 0.07 | [0.03-0.11]  | kg        | rs1514175-A  | chr1  |
| 275 | 20935630 | Speliotes EK   | Nat Genet         | Body mass inde   | Obesity | 4E-10  | 0.06 | [0.02-0.10]  | kg        | rs1555543-C  | chr1  |
| 276 | 19079261 | Willer CJ      | Nat Genet         | Body mass inde   | Obesity | 5E-18  | 0.2  | [0.12-0.28]  | kg        | rs17782313-C | chr18 |
| 277 | 18454148 | Loos RJ        | Nat Genet         | Body mass inde   | Obesity | 3E-15  | 0.05 | [0.04-0.06]  | un        | rs17782313-C | chr18 |
| 278 | 21701570 | Nq MC          | Obesity (Silver S | Body mass inde   | Obesity | 6E-06  | 0.09 | [0.05-0.13]  | s.d       | rs2033195-C  | chr5  |

|     |          |                  |                   |                  |                  |       |      |                 |           |              |       |
|-----|----------|------------------|-------------------|------------------|------------------|-------|------|-----------------|-----------|--------------|-------|
| 279 | 19079261 | Willer CJ        | Nat Genet         | Body mass inde   | Obesity          | 6E-06 | NR   | NR              |           | rs2145270-T  | chr20 |
| 280 | 20397748 | Liu JZ           | Twin Res Hum G    | Body mass inde   | Obesity          | 4E-07 | 0.09 | [0.05-0.13]     | SD        | rs2275215-T  | chr6  |
| 281 | 20935630 | Speliotes EK     | Nat Genet         | Body mass inde   | Obesity          | 2E-22 | 0.13 | [0.09-0.17]     | kg        | rs2815752-A  | chr1  |
| 282 | 19079261 | Willer CJ        | Nat Genet         | Body mass inde   | Obesity          | 6E-08 | 0.1  | [0.04-0.16]     | kg        | rs2815752-A  | chr1  |
| 283 | 20935630 | Speliotes EK     | Nat Genet         | Body mass inde   | Obesity          | 2E-12 | 0.06 | [0.02-0.10]     | kg        | rs3817334-T  | chr11 |
| 284 | 20935630 | Speliotes EK     | Nat Genet         | Body mass inde   | Obesity          | 4E-23 | 0.22 | [0.16-0.28]     | kg        | rs543874-G   | chr1  |
| 285 | 20935630 | Speliotes EK     | Nat Genet         | Body mass inde   | Obesity          | 6E-42 | 0.23 | [0.17-0.29]     | kg        | rs571312-A   | chr18 |
| 286 | 19079260 | Thorleifsson G   | Nat Genet         | Body mass inde   | Obesity          | 5E-10 | 4.58 | [3.07-6.09]     | %         | rs6265-G     | chr11 |
| 287 | 19079261 | Willer CJ        | Nat Genet         | Body mass inde   | Obesity          | 1E-18 | 0.26 | [0.19-0.34]     | kg        | rs6548238-C  | chr2  |
| 288 | 21701570 | Ng MC            | Obesity (Silver S | Body mass inde   | Obesity          | 2E-06 | 0.17 | [0.10-0.24]     | s.d       | rs6794092-G  | chr3  |
| 289 | 20935630 | Speliotes EK     | Nat Genet         | Body mass inde   | Obesity          | 6E-22 | 0.14 | [0.10-0.18]     | kg        | rs713586-C   | chr2  |
| 290 | 20935630 | Speliotes EK     | Nat Genet         | Body mass inde   | Obesity          | 2E-17 | 0.12 | [0.08-0.16]     | kg        | rs7138803-A  | chr12 |
| 291 | 19079260 | Thorleifsson G   | Nat Genet         | Body mass inde   | Obesity          | 1E-07 | 3.28 | [2.06-4.50]     | %         | rs7138803-A  | chr12 |
| 292 | 19079260 | Thorleifsson G   | Nat Genet         | Body mass inde   | Obesity          | 8E-06 | 3.15 | [1.78-4.52]     | %         | rs7481311-T  | chr11 |
| 293 | 19079260 | Thorleifsson G   | Nat Genet         | Body mass inde   | Obesity          | 1E-47 | 8.04 | [6.96-9.12]     | %         | rs8050136-A  | chr16 |
| 294 | 20935630 | Speliotes EK     | Nat Genet         | Body mass inde   | Obesity          | 1E-07 | NR   | NR              |           | rs867559-G   | chr9  |
| 295 | 20935630 | Speliotes EK     | Nat Genet         | Body mass inde   | Obesity          | 3E-20 | 0.13 | [0.07-0.19]     | kg        | rs987237-G   | chr6  |
| 296 | 20966902 | Crteau-Chonka    | Obesity (Silver S | Body mass inde   | Obesity          | 9E-06 | 0.05 | [0.02-0.07]     | un        | rs9906155-T  | chr17 |
| 297 | 19079261 | Willer CJ        | Nat Genet         | Body mass inde   | Obesity          | 4E-51 | 0.33 | [0.27-0.39]     | kg        | rs9939609-A  | chr16 |
| 298 | 17434869 | Frayling TM      | Science           | Body mass inde   | Obesity          | 2E-20 | 0.36 | [NR]            | kg/m2 per | rs9939609-A  | chr16 |
| 299 | 19249006 | Xiong DH         | Am J Hum Gene     | Bone mineral de  | Other            | 2E-08 | 1    | % [NR] of vari  |           | rs11864477-C | chr16 |
| 300 | 19249006 | Xiong DH         | Am J Hum Gene     | Bone mineral de  | Other            | 1E-06 | 1.2  | % [NR] of vari  |           | rs17131547-A | chr1  |
| 301 | 18455228 | Richards JB      | Lancet            | Bone mineral de  | Other            | 6E-12 | 0.13 | [NR] SD decre   |           | rs3736228-T  | chr11 |
| 302 | 21533022 | Duncan EL        | PLoS Genet        | Bone mineral de  | Other            | 5E-10 | 0.06 | [NR] unit decre |           | rs6710518-T  | chr2  |
| 303 | 21533022 | Duncan EL        | PLoS Genet        | Bone mineral de  | Other            | 1E-06 | 0.14 | [NR] unit decre |           | rs7524102-G  | chr1  |
| 304 | 21533022 | Duncan EL        | PLoS Genet        | Bone mineral de  | Other            | 9E-07 | 0.44 | [NR] unit decre |           | rs7524102-G  | chr1  |
| 305 | 19874204 | Guo Y            | J Bone Miner R    | Bone mineral de  | Other            | 2E-06 | 0.11 | [NR] s.d. incre |           | rs8057551-G  | chr16 |
| 306 | 21533022 | Duncan EL        | PLoS Genet        | Bone mineral de  | Other            | 4E-06 | 0.05 | [NR] unit incre |           | rs9466056-G  | chr6  |
| 307 | 21533022 | Duncan EL        | PLoS Genet        | Bone mineral de  | Other            | 4E-06 | 0.15 | [NR] unit incre |           | rs9594738-T  | chr13 |
| 308 | 19874204 | Guo Y            | J Bone Miner R    | Bone mineral de  | Other            | 4E-07 | 0.11 | [NR] s.d. incre |           | rs9630182-T  | chr11 |
| 309 | 19801982 | Rivadeneira F    | Nat Genet         | Bone mineral de  | Other            | 2E-07 | 0.09 | [0.06-0.12]     | s.d       | rs10048146-G | chr16 |
| 310 | 19079262 | Styrkarsdottir U | Nat Genet         | Bone mineral de  | Other            | 7E-07 | 0.08 | [0.05-0.11]     | s.d       | rs1007738-A  | chr11 |
| 311 | 19079262 | Styrkarsdottir U | Nat Genet         | Bone mineral de  | Other            | 4E-10 | 0.08 | [0.06-0.11]     | s.d       | rs1038304-G  | chr6  |
| 312 | 18445777 | Styrkarsdottir U | N Engl J Med      | Bone mineral de  | Other            | 5E-09 | 0.08 | [0.06-0.11]     | s.d       | rs1038304-G  | chr6  |
| 313 | 19801982 | Rivadeneira F    | Nat Genet         | Bone mineral de  | Other            | 8E-07 | 0.06 | [0.04-0.08]     | s.d       | rs1471403-T  | chr4  |
| 314 | 19801982 | Rivadeneira F    | Nat Genet         | Bone mineral de  | Other            | 2E-12 | 0.1  | [0.07-0.13]     | s.d       | rs2566755-C  | chr1  |
| 315 | 19801982 | Rivadeneira F    | Nat Genet         | Bone mineral de  | Other            | 6E-10 | 0.09 | [0.06-0.12]     | s.d       | rs7117858-G  | chr11 |
| 316 | 19079262 | Styrkarsdottir U | Nat Genet         | Bone mineral de  | Other            | 1E-16 | 0.15 | [0.11-0.18]     | s.d       | rs7524102-A  | chr1  |
| 317 | 18445777 | Styrkarsdottir U | N Engl J Med      | Bone mineral de  | Other            | 5E-16 | 0.15 | [0.11-0.19]     | s.d       | rs7524102-A  | chr1  |
| 318 | 19801982 | Rivadeneira F    | Nat Genet         | Bone mineral de  | Other            | 8E-10 | 0.07 | [0.05-0.09]     | s.d       | rs87938-A    | chr3  |
| 319 | 18445777 | Styrkarsdottir U | N Engl J Med      | Bone mineral de  | Other            | 2E-08 | 0.1  | [0.06-0.13]     | s.d       | rs9594738-T  | chr13 |
| 320 | 19801982 | Rivadeneira F    | Nat Genet         | Bone mineral de  | Other            | 2E-08 | 0.09 | [0.06-0.12]     | s.d       | rs10048146-G | chr16 |
| 321 | 18445777 | Styrkarsdottir U | N Engl J Med      | Bone mineral de  | Other            | 4E-11 | 0.1  | [0.07-0.13]     | s.d       | rs1038304-G  | chr6  |
| 322 | 19801982 | Rivadeneira F    | Nat Genet         | Bone mineral de  | Other            | 2E-08 | 0.07 | [0.05-0.09]     | s.d       | rs1471403-T  | chr4  |
| 323 | 19801982 | Rivadeneira F    | Nat Genet         | Bone mineral de  | Other            | 1E-08 | 0.07 | [0.05-0.09]     | s.d       | rs2016266-G  | chr12 |
| 324 | 19801982 | Rivadeneira F    | Nat Genet         | Bone mineral de  | Other            | 3E-10 | 0.09 | [0.06-0.12]     | s.d       | rs7524102-G  | chr1  |
| 325 | 18445777 | Styrkarsdottir U | N Engl J Med      | Bone mineral de  | Other            | 9E-09 | 0.11 | [0.07-0.15]     | s.d       | rs7524102-A  | chr1  |
| 326 | 21424380 | Sehrawat B       | Hum Genet         | Breast cancer    | Other            | 7E-06 | 1.42 | [1.22-1.65]     |           | rs10411161-T | chr19 |
| 327 | 21908515 | Cai Q            | Hum Mol Genet     | Breast cancer    | Other            | 6E-09 | 1.12 | [1.06-1.18]     |           | rs10822013-T | chr10 |
| 328 | 20872241 | Li J             | Breast Cancer F   | Breast cancer    | Other            | 2E-13 | 1.32 | [1.22-1.42]     |           | rs1219648-G  | chr10 |
| 329 | 17529973 | Hunter DJ        | Nat Genet         | Breast cancer    | Other            | 1E-10 | 1.2  | [1.07-1.42]     |           | rs1219648-G  | chr10 |
| 330 | 21263130 | Fletcher O       | J Natl Cancer In  | Breast cancer    | Other            | 3E-11 | 1.16 | [1.11-1.22]     |           | rs1562430-A  | chr8  |
| 331 | 20453838 | Turnbull C       | Nat Genet         | Breast cancer    | Other            | 6E-07 | 1.17 | [1.10-1.25]     |           | rs1562430-T  | chr8  |
| 332 | 19219042 | Zheng W          | Nat Genet         | Breast cancer    | Other            | 2E-15 | 1.29 | [1.21-1.37]     |           | rs2046210-A  | chr6  |
| 333 | 21908515 | Cai Q            | Hum Mol Genet     | Breast cancer    | Other            | 6E-06 | 1.11 | [1.05-1.17]     |           | rs2048672-C  | chr7  |
| 334 | 18326623 | Gold B           | Proc Natl Acad    | Breast cancer    | Other            | 3E-08 | 1.41 | [1.25-1.59]     |           | rs2180341-G  | chr6  |
| 335 | 20453838 | Turnbull C       | Nat Genet         | Breast cancer    | Other            | 5E-07 | 1.06 | [1.02-1.10]     |           | rs2380205-C  | chr10 |
| 336 | 17529967 | Easton DF        | Nature            | Breast cancer    | Other            | 2E-76 | 1.26 | [1.23-1.30]     |           | rs2981582-A  | chr10 |
| 337 | 20872241 | Li J             | Breast Cancer F   | Breast cancer    | Other            | 4E-07 | 1.22 | [1.13-1.32]     |           | rs3803662-A  | chr16 |
| 338 | 20453838 | Turnbull C       | Nat Genet         | Breast cancer    | Other            | 3E-15 | 1.3  | [1.22-1.39]     |           | rs3803662-A  | chr16 |
| 339 | 19330030 | Thomas G         | Nat Genet         | Breast cancer    | Other            | 1E-09 | 1.16 | [1.07-1.27]     |           | rs3803662-T  | chr16 |
| 340 | 17529967 | Easton DF        | Nature            | Breast cancer    | Other            | 1E-36 | 1.2  | [1.16-1.24]     |           | rs3803662-T  | chr16 |
| 341 | 17529974 | Stacey SN        | Nat Genet         | Breast cancer    | Other            | 6E-19 | 1.28 | [1.21-1.35]     |           | rs3803662-T  | chr16 |
| 342 | 17529967 | Easton DF        | Nature            | Breast cancer    | Other            | 3E-09 | 1.07 | [1.04-1.11]     |           | rs3817198-C  | chr11 |
| 343 | 20453838 | Turnbull C       | Nat Genet         | Breast cancer    | Other            | 3E-15 | 1.15 | [1.10-1.20]     |           | rs614367-T   | chr11 |
| 344 | 20453838 | Turnbull C       | Nat Genet         | Breast cancer    | Other            | 4E-09 | 1.07 | [1.03-1.11]     |           | rs704010-A   | chr10 |
| 345 | 22232737 | Shu XO           | Cancer Res        | Breast cancer (s | Other            | 3E-07 | 1.43 | [1.25-1.64]     |           | rs3784099-A  | chr14 |
| 346 | 22232737 | Shu XO           | Cancer Res        | Breast cancer (s | Other            | 1E-07 | 1.49 | [1.28-1.72]     |           | rs3784099-A  | chr14 |
| 347 | 22232737 | Shu XO           | Cancer Res        | Breast cancer (s | Other            | 6E-06 | 1.29 | [1.16-1.44]     |           | rs9934948-C  | chr16 |
| 348 | 20212171 | Buil A           | Blood             | C4b binding pro  | Other            | 4E-10 | NR   | NR              |           | rs3813948-C  | chr1  |
| 349 | 21490707 | Cornelis MC      | PLoS Genet        | Caffeine consum  | Other            | 7E-06 | 0.15 | [0.08-0.22]     | mg        | rs7447447-T  | chr5  |
| 350 | 21490707 | Cornelis MC      | PLoS Genet        | Caffeine consum  | Other            | 5E-06 | 0.07 | [0.04-0.10]     | mg        | rs8014204-A  | chr14 |
| 351 | 19584346 | Vasan RS         | JAMA              | Cardiac structur | Other            | 9E-07 | 0.06 | [0.04-0.08]     | cm        | rs17132261-T | chr5  |
| 352 | 19584346 | Vasan RS         | JAMA              | Cardiac structur | Other            | 7E-07 | 0.17 | [0.11-0.23]     | cm        | rs7910620-G  | chr10 |
| 353 | 20838585 | Smith EN         | PLoS Genet        | Cardiovascular   | Hypertriglycerid | 8E-06 | 0.69 | [0.40-0.98]     | %         | rs12280753-T | chr11 |
| 354 | 21943158 | Middelberg RP    | BMC Med Gene      | Cardiovascular   | Other            | 9E-71 | 0.31 | [0.27-0.34]     | um        | rs7671266-T  | chr4  |

|     |          |                |                 |                   |       |        |      |                 |              |       |
|-----|----------|----------------|-----------------|-------------------|-------|--------|------|-----------------|--------------|-------|
| 355 | 19185284 | Ferrucci L     | Am J Hum Genet  | Carotenoid and    | Other | 2E-24  | 0.15 | [0.120-0.177]   | rs6564851-G  | chr16 |
| 356 | 20009918 | Shrestha S     | AIDS            | Carotid atheros   | Other | 2E-06  | NR   | NR              | rs13053817-A | chr22 |
| 357 | 20009918 | Shrestha S     | AIDS            | Carotid atheros   | Other | 1E-06  | NR   | NR              | rs17151904-A | chr7  |
| 358 | 20009918 | Shrestha S     | AIDS            | Carotid atheros   | Other | 9E-07  | NR   | NR              | rs17691394-G | chr7  |
| 359 | 21909108 | Bis JC         | Nat Genet       | Carotid intima m  | Other | 2E-11  | 0.01 | [0.01-0.01] un  | rs11781551-A | chr8  |
| 360 | 21909108 | Bis JC         | Nat Genet       | Carotid intima m  | Other | 4E-07  | 0.3  | [0.18-0.42] un  | rs17045031-A | chr3  |
| 361 | 21909108 | Bis JC         | Nat Genet       | Carotid intima m  | Other | 2E-12  | 0.16 | [0.11-0.21] un  | rs17398575-A | chr7  |
| 362 | 21909108 | Bis JC         | Nat Genet       | Carotid intima m  | Other | 3E-06  | 0.01 | [0.01-0.01] pe  | rs17398575-A | chr7  |
| 363 | 21909108 | Bis JC         | Nat Genet       | Carotid intima m  | Other | 8E-08  | 0.01 | [0.01-0.01] un  | rs4712972-A  | chr6  |
| 364 | 20190752 | Dubois PC      | Nat Genet       | Celiac disease    | Other | 5E-16  | 1.21 | [1.16-1.27]     | rs11221332-A | chr11 |
| 365 | 20190752 | Dubois PC      | Nat Genet       | Celiac disease    | Other | 1E-50  | 6.23 | [5.95-6.52]     | rs2187668-A  | chr6  |
| 366 | 17558408 | van Heel DA    | Nat Genet       | Celiac disease    | Other | 1E-19  | 7.04 | [6.08-8.15]     | rs2187668-A  | chr6  |
| 367 | 20190752 | Dubois PC      | Nat Genet       | Celiac disease    | Other | 4E-19  | 1.23 | [1.17-1.28]     | rs2327832-G  | chr6  |
| 368 | 20190752 | Dubois PC      | Nat Genet       | Celiac disease    | Other | 7E-07  | 1.13 | [1.08-1.18]     | rs2762051-A  | chr13 |
| 369 | 20190752 | Dubois PC      | Nat Genet       | Celiac disease    | Other | 6E-09  | 1.14 | [1.09-1.19]     | rs4675374-A  | chr2  |
| 370 | 20190752 | Dubois PC      | Nat Genet       | Celiac disease    | Other | 7E-21  | 1.2  | [1.15-1.24]     | rs653178-G   | chr12 |
| 371 | 18311140 | Hunt KA        | Nat Genet       | Celiac disease    | Other | 8E-08  | 1.21 | [1.13-1.30]     | rs653178-G   | chr12 |
| 372 | 21383967 | Zhernakova A   | PLoS Genet      | Celiac disease    | Other | 1E-08  | NR   | NR              | rs11203203-A | chr21 |
| 373 | 21383967 | Zhernakova A   | PLoS Genet      | Celiac disease    | Other | 3E-19  | NR   | NR              | rs653178-C   | chr12 |
| 374 | 20719862 | Vitart V       | Hum Mol Genet   | Central corneal   | Other | 1E-08  | 0.17 | [0.11-0.23] un  | rs2755237-A  | chr13 |
| 375 | 20719862 | Vitart V       | Hum Mol Genet   | Central corneal   | Other | 1E-08  | 0.13 | [0.09-0.18] un  | rs6496932-C  | chr15 |
| 376 | 20686565 | Teslovich TM   | Nature          | Cholesterol, tota | Other | 3E-08  | 1.06 | [0.63-1.49] mg  | rs10128711-T | chr11 |
| 377 | 20686565 | Teslovich TM   | Nature          | Cholesterol, tota | Other | 3E-38  | 4.74 | [3.92-5.56] mg  | rs10401969-C | chr19 |
| 378 | 19060911 | Aulchenko YS   | Nat Genet       | Cholesterol, tota | Other | 4E-12  | 0.08 | [NR] s.d. decre | rs10889353-C | chr1  |
| 379 | 19060911 | Aulchenko YS   | Nat Genet       | Cholesterol, tota | Other | 5E-10  | 0.06 | [NR] s.d. incre | rs10903129-G | chr1  |
| 380 | 20686565 | Teslovich TM   | Nature          | Cholesterol, tota | Other | 1E-16  | 2.18 | [1.65-2.71] mg  | rs1564348-C  | chr6  |
| 381 | 19060911 | Aulchenko YS   | Nat Genet       | Cholesterol, tota | Other | 2E-10  | 0.09 | [NR] s.d. incre | rs174570-G   | chr11 |
| 382 | 20686565 | Teslovich TM   | Nature          | Cholesterol, tota | Other | 6E-13  | 4.73 | [3.44-6.02] mg  | rs1800961-T  | chr20 |
| 383 | 20686565 | Teslovich TM   | Nature          | Cholesterol, tota | Other | 4E-24  | 1.96 | [1.49-2.43] mg  | rs2479409-G  | chr1  |
| 384 | 20686565 | Teslovich TM   | Nature          | Cholesterol, tota | Other | 5E-13  | 1.38 | [0.95-1.81] mg  | rs2642442-T  | chr1  |
| 385 | 19060911 | Aulchenko YS   | Nat Genet       | Cholesterol, tota | Other | 3E-19  | 0.09 | [NR] s.d. incre | rs3846662-G  | chr5  |
| 386 | 20686565 | Teslovich TM   | Nature          | Cholesterol, tota | Other | 5E-111 | 6.83 | [6.2-7.46] mg/l | rs4420638-G  | chr19 |
| 387 | 19060911 | Aulchenko YS   | Nat Genet       | Cholesterol, tota | Other | 2E-11  | 0.07 | [NR] s.d. incre | rs4939883-G  | chr18 |
| 388 | 20686565 | Teslovich TM   | Nature          | Cholesterol, tota | Other | 6E-131 | 5.41 | [4.94-5.88] mg  | rs629301-G   | chr1  |
| 389 | 19060911 | Aulchenko YS   | Nat Genet       | Cholesterol, tota | Other | 9E-23  | 0.1  | [NR] s.d. decre | rs693-G      | chr2  |
| 390 | 20686565 | Teslovich TM   | Nature          | Cholesterol, tota | Other | 1E-08  | 1.01 | [0.62-1.4] mg/l | rs7206971-A  | chr17 |
| 391 | 20686565 | Teslovich TM   | Nature          | Cholesterol, tota | Other | 3E-08  | 1.18 | [0.71-1.65] mg  | rs7515577-C  | chr1  |
| 392 | 20686565 | Teslovich TM   | Nature          | Cholesterol, tota | Other | 6E-57  | 4.68 | [4.11-5.25] mg  | rs964184-G   | chr11 |
| 393 | 21725309 | Miki D         | Nat Genet       | Chronic Hepatiti  | Other | 1E-13  | 1.75 | [1.51-2.03]     | rs1012068-G  | chr22 |
| 394 | 20060832 | Rauch A        | Gastroenterolog | Chronic Hepatiti  | Other | 6E-09  | 2.31 | [1.74-3.06]     | rs8099917-G  | chr19 |
| 395 | 20383146 | Kottgen A      | Nat Genet       | Chronic kidney d  | Other | 1E-08  | 0.01 | [0.010-0.018]   | rs10794720-T | chr10 |
| 396 | 20383146 | Kottgen A      | Nat Genet       | Chronic kidney d  | Other | 1E-19  | NR   | NR              | rs17319721-A | chr4  |
| 397 | 20383146 | Kottgen A      | Nat Genet       | Chronic kidney d  | Other | 1E-12  | 0.01 | [0.004-0.016]   | rs267734-C   | chr1  |
| 398 | 20383146 | Kottgen A      | Nat Genet       | Chronic kidney d  | Other | 3E-11  | 1.09 | [0.007-0.011]   | rs347685-C   | chr3  |
| 399 | 20383146 | Kottgen A      | Nat Genet       | Chronic kidney d  | Other | 1E-07  | 0.01 | [0.006-0.010]   | rs4014195-G  | chr11 |
| 400 | 20383146 | Kottgen A      | Nat Genet       | Chronic kidney d  | Other | 4E-11  | 0.01 | [0.009-0.017]   | rs653178-T   | chr12 |
| 401 | 20383146 | Kottgen A      | Nat Genet       | Chronic kidney d  | Other | 1E-15  | 0.01 | [0.007-0.015]   | rs9895661-C  | chr17 |
| 402 | 20686651 | Gudbjartsson D | PLoS Genet      | Chronic kidney d  | Other | 4E-10  | 1.25 | [1.17-1.35]     | rs4293393-T  | chr16 |
| 403 | 18758461 | Di Bernardo MC | Nat Genet       | Chronic lympho    | Other | 6E-10  | 1.41 | [1.26-1.57]     | rs13397985-G | chr2  |
| 404 | 18758461 | Di Bernardo MC | Nat Genet       | Chronic lympho    | Other | 2E-10  | 1.39 | [1.25-1.53]     | rs17483466-G | chr2  |
| 405 | 21131588 | Slager SL      | Blood           | Chronic lympho    | Other | 7E-09  | 1.69 | [1.41-2.01]     | rs674313-T   | chr6  |
| 406 | 20062064 | Crowther-Swan  | Nat Genet       | Chronic lympho    | Other | 5E-07  | 1.36 | [1.21-1.53]     | rs7169431-A  | chr15 |
| 407 | 18758461 | Di Bernardo MC | Nat Genet       | Chronic lympho    | Other | 4E-12  | 1.45 | [1.31-1.61]     | rs735665-A   | chr11 |
| 408 | 20062064 | Crowther-Swan  | Nat Genet       | Chronic lympho    | Other | 2E-09  | 1.38 | [1.25-1.56]     | rs757978-A   | chr2  |
| 409 | 20062064 | Crowther-Swan  | Nat Genet       | Chronic lympho    | Other | 4E-06  | 1.18 | [1.10-1.27]     | rs783540-G   | chr15 |
| 410 | 21131588 | Slager SL      | Blood           | Chronic lympho    | Other | 9E-08  | 1.61 | [1.35-1.92]     | rs9272535-A  | chr6  |
| 411 | 21131588 | Slager SL      | Blood           | Chronic lympho    | Other | 2E-06  | 1.38 | [1.20-1.58]     | rs9378805-C  | chr6  |
| 412 | 21540461 | Kim DH         | Blood           | Chronic myeloid   | Other | 1E-12  | 1.85 | [1.56-2.17]     | rs4795519-C  | chr17 |
| 413 | 21540461 | Kim DH         | Blood           | Chronic myeloid   | Other | 2E-06  | 1.67 | [1.35-2.04]     | rs4869742-T  | chr6  |
| 414 | 20231535 | Smith NL       | Circulation     | Coagulation fac   | Other | 6E-37  | NR   | NR              | rs867186-G   | chr20 |
| 415 | 21357676 | Sulem P        | Hum Mol Genet   | Coffee consump    | Other | 5E-14  | 0.31 | [0.17-0.44] inc | rs2472297-T  | chr15 |
| 416 | 17618283 | Zanke BW       | Nat Genet       | Colorectal canc   | Other | 3E-11  | 1.17 | [1.12-1.23]     | rs10505477-A | chr8  |
| 417 | 18372905 | Tomlinson IP   | Nat Genet       | Colorectal canc   | Other | 3E-18  | 1.27 | [1.20-1.34]     | rs16892766-A | chr8  |
| 418 | 21242260 | Cui R          | Gut             | Colorectal canc   | Other | 2E-08  | 1.18 | [1.11-1.25]     | rs6983267-G  | chr8  |
| 419 | 17618284 | Tomlinson I    | Nat Genet       | Colorectal canc   | Other | 1E-14  | 1.27 | [1.16-1.39]     | rs6983267-G  | chr8  |
| 420 | 18372901 | Tenesa A       | Nat Genet       | Colorectal canc   | Other | 9E-26  | 1.19 | [1.15-1.23]     | rs7014346-A  | chr8  |
| 421 | 20585627 | Eriksson N     | PLoS Genet      | Common traits     | Other | 1E-10  | 0.13 | [NR] unit incre | rs499697-G   | chr1  |
| 422 | 18846501 | Sonuga-Barke E | Am J Med Gene   | Conduct disorde   | Other | 9E-06  | 1.3  | [NR] unit incre | rs17116334-T | chr11 |
| 423 | 18846501 | Sonuga-Barke E | Am J Med Gene   | Conduct disorde   | Other | 7E-06  | 1.39 | [NR] unit incre | rs17664267-T | chr18 |
| 424 | 18846501 | Sonuga-Barke E | Am J Med Gene   | Conduct disorde   | Other | 7E-06  | 2.88 | [NR] unit incre | rs2282301-A  | chr1  |
| 425 | 18846501 | Sonuga-Barke E | Am J Med Gene   | Conduct disorde   | Other | 7E-06  | 1.13 | [NR] unit incre | rs4321143-G  | chr15 |
| 426 | 18846501 | Sonuga-Barke E | Am J Med Gene   | Conduct disorde   | Other | 5E-06  | 2.05 | [NR] unit decre | rs719593-T   | chr2  |
| 427 | 18846501 | Sonuga-Barke E | Am J Med Gene   | Conduct disorde   | Other | 8E-06  | 1.76 | [NR] unit decre | rs8073783-C  | chr17 |
| 428 | 18846501 | Sonuga-Barke E | Am J Med Gene   | Conduct disorde   | Other | 7E-06  | 1.15 | [NR] unit decre | rs893971-T   | chr4  |
| 429 | 22144915 | Fan Q          | PLoS Genet      | Corneal astigma   | Other | 5E-06  | 1.29 | [1.17-1.41]     | rs2270676-G  | chr11 |
| 430 | 22144915 | Fan Q          | PLoS Genet      | Corneal astigma   | Other | 3E-06  | 1.39 | [1.21-1.57]     | rs6758183-A  | chr2  |

|     |          |              |                 |                  |                 |        |      |             |                       |       |
|-----|----------|--------------|-----------------|------------------|-----------------|--------|------|-------------|-----------------------|-------|
| 431 | 22144915 | Fan Q        | PLoS Genet      | Corneal astigma  | Other           | 5E-06  | 1.24 | [1.14-1.34] | rs6792584-G           | chr3  |
| 432 | 22144915 | Fan Q        | PLoS Genet      | Corneal astigma  | Other           | 8E-09  | 1.26 | [1.18-1.34] | rs7677751-T           | chr4  |
| 433 | 22144573 | O'Donnell CJ | Circulation     | Coronary artery  | Coronary Artery | 3E-24  | 0.2  | [0.16-0.24] | % rs1333049-C         | chr9  |
| 434 | 21347282 | Lettre G     | PLoS Genet      | Coronary heart   | Other           | 4E-06  | 0.22 | [0.13-0.31] | SD rs1028771-A        | chr1  |
| 435 | 21347282 | Lettre G     | PLoS Genet      | Coronary heart   | Other           | 3E-06  | 0.07 | [0.04-0.10] | SD rs10895547-T       | chr11 |
| 436 | 21378990 | Schunkert H  | Nat Genet       | Coronary heart   | Coronary Artery | 9E-08  | 1.08 | [1.05-1.11] | rs11206510-T          | chr1  |
| 437 | 21378990 | Schunkert H  | Nat Genet       | Coronary heart   | Coronary Artery | 1E-09  | 1.14 | [1.09-1.18] | rs1122608-G           | chr19 |
| 438 | 21378990 | Schunkert H  | Nat Genet       | Coronary heart   | Coronary Artery | 9E-18  | 1.09 | [1.07-1.12] | rs11556924-C          | chr7  |
| 439 | 21347282 | Lettre G     | PLoS Genet      | Coronary heart   | Other           | 1E-08  | 0.17 | [0.11-0.23] | SD rs11669133-A       | chr19 |
| 440 | 21347282 | Lettre G     | PLoS Genet      | Coronary heart   | Other           | 9E-07  | 0.11 | [0.07-0.15] | SD rs11671653-A       | chr19 |
| 441 | 21347282 | Lettre G     | PLoS Genet      | Coronary heart   | Other           | 6E-06  | 0.09 | [0.05-0.13] | SD rs11684202-A       | chr2  |
| 442 | 21378990 | Schunkert H  | Nat Genet       | Coronary heart   | Coronary Artery | 1E-12  | 1.08 | [1.06-1.10] | rs12190287-C          | chr6  |
| 443 | 21347282 | Lettre G     | PLoS Genet      | Coronary heart   | Other           | 5E-06  | 0.09 | [0.05-0.13] | SD rs12239436-A       | chr1  |
| 444 | 21347282 | Lettre G     | PLoS Genet      | Coronary heart   | Other           | 2E-06  | 0.07 | [0.04-0.10] | SD rs12269901-C       | chr11 |
| 445 | 21378990 | Schunkert H  | Nat Genet       | Coronary heart   | Coronary Artery | 1E-09  | 1.12 | [1.08-1.16] | rs12413409-G          | chr10 |
| 446 | 21378990 | Schunkert H  | Nat Genet       | Coronary heart   | Coronary Artery | 1E-09  | 1.1  | [1.06-1.13] | rs12526453-C          | chr6  |
| 447 | 21347282 | Lettre G     | PLoS Genet      | Coronary heart   | Other           | 2E-07  | 0.09 | [0.06-0.12] | SD rs1263173-A        | chr11 |
| 448 | 21347282 | Lettre G     | PLoS Genet      | Coronary heart   | Other           | 4E-07  | 0.18 | [0.11-0.25] | SD rs13015955-A       | chr2  |
| 449 | 21378988 | C4DGC        | Nat Genet       | Coronary heart   | Coronary Artery | 6E-08  | 1.11 | [1.07-1.15] | rs1332844-T           | chr6  |
| 450 | 21606135 | Wild PS      | Circ Cardiovasc | Coronary heart   | Coronary Artery | 7E-58  | 1.27 | [1.23-1.31] | rs1333049-C           | chr9  |
| 451 | 17634449 | Samani NJ    | N Engl J Med    | Coronary heart   | Coronary Artery | 3E-19  | 1.36 | [1.27-1.46] | rs1333049-C           | chr9  |
| 452 | 17554300 | WTCCC        | Nature          | Coronary heart   | Coronary Artery | 1E-13  | 1.47 | [1.27-1.70] | rs1333049-C           | chr9  |
| 453 | 21347282 | Lettre G     | PLoS Genet      | Coronary heart   | Other           | 9E-06  | 0.14 | [0.08-0.20] | SD rs1445021-A        | chr15 |
| 454 | 21606135 | Wild PS      | Circ Cardiovasc | Coronary heart   | Coronary Artery | 5E-06  | 1.13 | [1.07-1.21] | rs16893526-G          | chr6  |
| 455 | 21347282 | Lettre G     | PLoS Genet      | Coronary heart   | Other           | 6E-07  | 0.14 | [0.09-0.19] | SD rs16965039-T       | chr16 |
| 456 | 21347282 | Lettre G     | PLoS Genet      | Coronary heart   | Other           | 5E-06  | 0.07 | [0.04-0.10] | SD rs16971384-A       | chr16 |
| 457 | 17634449 | Samani NJ    | N Engl J Med    | Coronary heart   | Coronary Artery | 2E-07  | 1.21 | [1.13-1.30] | rs17228212-C          | chr15 |
| 458 | 21378990 | Schunkert H  | Nat Genet       | Coronary heart   | Coronary Artery | 3E-10  | 1.09 | [1.07-1.13] | rs1746048-C           | chr10 |
| 459 | 21378990 | Schunkert H  | Nat Genet       | Coronary heart   | Coronary Artery | 1E-08  | 1.14 | [1.09-1.20] | rs17465637-C          | chr1  |
| 460 | 17634449 | Samani NJ    | N Engl J Med    | Coronary heart   | Coronary Artery | 1E-06  | 1.2  | [1.12-1.30] | rs17465637-C          | chr1  |
| 461 | 21378990 | Schunkert H  | Nat Genet       | Coronary heart   | Coronary Artery | 1E-08  | 1.07 | [1.05-1.10] | rs17609940-G          | chr6  |
| 462 | 17554300 | WTCCC        | Nature          | Coronary heart   | Coronary Artery | 2E-06  | 1.43 | [1.23-1.64] | rs17672135-T          | chr1  |
| 463 | 21239051 | Reilly MP    | Lancet          | Coronary heart   | Coronary Artery | 5E-13  | 1.19 | [1.13-1.24] | rs1994016-C           | chr15 |
| 464 | 19198612 | Erdmann J    | Nat Genet       | Coronary heart   | Coronary Artery | 5E-07  | 1.08 | [1.05-1.11] | rs2259816-T           | chr12 |
| 465 | 21378990 | Schunkert H  | Nat Genet       | Coronary heart   | Coronary Artery | 3E-08  | 1.12 | [1.07-1.16] | rs2306374-C           | chr3  |
| 466 | 21347282 | Lettre G     | PLoS Genet      | Coronary heart   | Other           | 2E-06  | 0.07 | [0.04-0.10] | SD rs2346177-A        | chr2  |
| 467 | 21378988 | C4DGC        | Nat Genet       | Coronary heart   | Coronary Artery | 4E-08  | 1.07 | [1.04-1.09] | rs2505083-C           | chr10 |
| 468 | 17634449 | Samani NJ    | N Engl J Med    | Coronary heart   | Coronary Artery | 2E-07  | 1.21 | [1.13-1.30] | rs2943634-C           | chr2  |
| 469 | 21606135 | Wild PS      | Circ Cardiovasc | Coronary heart   | Coronary Artery | 8E-07  | 1.11 | [1.06-1.15] | rs365302-C            | chr6  |
| 470 | 21347282 | Lettre G     | PLoS Genet      | Coronary heart   | Other           | 2E-11  | 0.09 | [0.06-0.12] | SD rs3729639-T        | chr16 |
| 471 | 21088011 | Erdmann J    | Eur Heart J     | Coronary heart   | Coronary Artery | 1E-11  | 1.15 | [1.11-1.20] | rs3739998-C           | chr10 |
| 472 | 21378990 | Schunkert H  | Nat Genet       | Coronary heart   | Coronary Artery | 2E-08  | 1.06 | [1.04-1.08] | rs46522-T             | chr17 |
| 473 | 21378990 | Schunkert H  | Nat Genet       | Coronary heart   | Coronary Artery | 4E-09  | 1.07 | [1.05-1.09] | rs4773144-G           | chr13 |
| 474 | 21347282 | Lettre G     | PLoS Genet      | Coronary heart   | Other           | 5E-06  | 0.08 | [0.05-0.11] | SD rs4804155-C        | chr19 |
| 475 | 21378990 | Schunkert H  | Nat Genet       | Coronary heart   | Coronary Artery | 5E-06  | 1.06 | [1.04-1.09] | rs4937126-G           | chr11 |
| 476 | 21378990 | Schunkert H  | Nat Genet       | Coronary heart   | Coronary Artery | 1E-22  | 1.29 | [1.23-1.36] | rs4977574-G           | chr9  |
| 477 | 21378988 | C4DGC        | Nat Genet       | Coronary heart   | Coronary Artery | 2E-25  | 1.2  | [1.16-1.25] | rs4977574-G           | chr9  |
| 478 | 21378990 | Schunkert H  | Nat Genet       | Coronary heart   | Coronary Artery | 3E-10  | 1.11 | [1.08-1.15] | rs599839-A            | chr1  |
| 479 | 17634449 | Samani NJ    | N Engl J Med    | Coronary heart   | Coronary Artery | 4E-09  | 1.29 | [1.18-1.40] | rs599839-A            | chr1  |
| 480 | 21378990 | Schunkert H  | Nat Genet       | Coronary heart   | Coronary Artery | 1E-09  | 1.14 | [1.09-1.19] | rs6725887-C           | chr2  |
| 481 | 17554300 | WTCCC        | Nature          | Coronary heart   | Coronary Artery | 4E-06  | 1.11 | [0.99-1.25] | rs688034-T            | chr22 |
| 482 | 17634449 | Samani NJ    | N Engl J Med    | Coronary heart   | Coronary Artery | 3E-08  | 1.23 | [1.15-1.33] | rs6922269-A           | chr6  |
| 483 | 21347282 | Lettre G     | PLoS Genet      | Coronary heart   | Other           | 3E-06  | 0.08 | [0.05-0.11] | SD rs7203193-A        | chr16 |
| 484 | 21347282 | Lettre G     | PLoS Genet      | Coronary heart   | Other           | 1E-07  | 0.14 | [0.09-0.19] | SD rs7323893-T        | chr13 |
| 485 | 21347282 | Lettre G     | PLoS Genet      | Coronary heart   | Other           | 5E-06  | 0.07 | [0.04-0.10] | SD rs744487-A         | chr1  |
| 486 | 21347282 | Lettre G     | PLoS Genet      | Coronary heart   | Other           | 1E-07  | 0.1  | [0.06-0.14] | SD rs7569328-T        | chr2  |
| 487 | 21378990 | Schunkert H  | Nat Genet       | Coronary heart   | Coronary Artery | 2E-06  | 1.06 | [1.04-1.09] | rs7651039-C           | chr3  |
| 488 | 21378990 | Schunkert H  | Nat Genet       | Coronary heart   | Coronary Artery | 1E-06  | 1.1  | [1.06-1.14] | rs7808424-G           | chr7  |
| 489 | 21606135 | Wild PS      | Circ Cardiovasc | Coronary heart   | Coronary Artery | 2E-27  | 1.18 | [1.14-1.21] | rs7865618-A           | chr9  |
| 490 | 17554300 | WTCCC        | Nature          | Coronary heart   | Coronary Artery | 6E-06  | 1.91 | [1.33-2.74] | rs8055236-G           | chr16 |
| 491 | 21347282 | Lettre G     | PLoS Genet      | Coronary heart   | Other           | 1E-06  | 0.08 | [0.05-0.11] | SD rs937254-A         | chr15 |
| 492 | 21347282 | Lettre G     | PLoS Genet      | Coronary heart   | Coronary Artery | 2E-06  | 1.66 | [1.35-2.04] | rs9546711-A           | chr13 |
| 493 | 21378990 | Schunkert H  | Nat Genet       | Coronary heart   | Coronary Artery | 1E-17  | 1.13 | [1.10-1.16] | rs964184-G            | chr11 |
| 494 | 19198612 | Erdmann J    | Nat Genet       | Coronary heart   | Coronary Artery | 7E-13  | 1.15 | [1.11-1.19] | rs9818870-T           | chr3  |
| 495 | 18439548 | Ridker PM    | Am J Hum Gene   | C-reactive prote | Other           | 1E-10  | 0.12 | [NR]        | mg/dl de rs10778213-G | chr12 |
| 496 | 21300955 | Dehghan A    | Circulation     | C-reactive prote | Other           | 1E-15  | 0.05 | [0.04-0.06] | un rs12239046-C       | chr1  |
| 497 | 21647738 | Wu Y         | Inflammation    | C-reactive prote | Other           | 1E-06  | 0.41 | [0.24-0.58] | un rs1408282-A        | chr6  |
| 498 | 21300955 | Dehghan A    | Circulation     | C-reactive prote | Other           | 2E-09  | 0.09 | [0.06-0.12] | un rs1800961-C        | chr20 |
| 499 | 18439548 | Ridker PM    | Am J Hum Gene   | C-reactive prote | Other           | 7E-21  | 0.17 | [NR]        | mg/dl de rs1892534-A  | chr1  |
| 500 | 21300955 | Dehghan A    | Circulation     | C-reactive prote | Other           | 2E-186 | 0.16 | [0.15-0.17] | un rs2794520-C        | chr1  |
| 501 | 21300955 | Dehghan A    | Circulation     | C-reactive prote | Other           | 4E-09  | 0.03 | [0.02-0.04] | un rs340029-T         | chr15 |
| 502 | 21300955 | Dehghan A    | Circulation     | C-reactive prote | Other           | 2E-48  | 0.08 | [0.07-0.09] | un rs4129267-C        | chr1  |
| 503 | 21300955 | Dehghan A    | Circulation     | C-reactive prote | Other           | 9E-139 | 0.24 | [0.22-0.26] | un rs4420638-A        | chr19 |
| 504 | 21196492 | Okada Y      | Hum Mol Genet   | C-reactive prote | Other           | 3E-07  | 0.14 | [0.09-0.19] | un rs4420638-A        | chr19 |
| 505 | 19567438 | Elliott P    | JAMA            | C-reactive prote | Other           | 5E-27  | 21.8 | [18.1-25.3] | % rs4420638-G         | chr19 |
| 506 | 19567438 | Elliott P    | JAMA            | C-reactive prote | Other           | 2E-14  | 11.5 | [8.5-14.4]  | % d rs4537545-T       | chr1  |

|     |          |               |                 |                  |                 |       |      |                 |              |       |
|-----|----------|---------------|-----------------|------------------|-----------------|-------|------|-----------------|--------------|-------|
| 507 | 21300955 | Dehghan A     | Circulation     | C-reactive prote | Other           | 1E-08 | 0.04 | [0.03-0.05] un  | rs4705952-G  | chr5  |
| 508 | 21300955 | Dehghan A     | Circulation     | C-reactive prote | Other           | 2E-17 | 0.05 | [0.04-0.06] un  | rs6734238-G  | chr2  |
| 509 | 21300955 | Dehghan A     | Circulation     | C-reactive prote | Other           | 5E-08 | 0.04 | [0.03-0.05] un  | rs6901250-A  | chr6  |
| 510 | 21647738 | Wu Y          | Inflammation    | C-reactive prote | Other           | 1E-08 | 0.27 | [0.18-0.36] un  | rs7305618-T  | chr12 |
| 511 | 19567438 | Elliott P     | JAMA            | C-reactive prote | Other           | 8E-44 | 20.7 | [18.9-23.4] %   | rs7553007-A  | chr1  |
| 512 | 18439548 | Ridker PM     | Am J Hum Gene   | C-reactive prote | Other           | 7E-15 | 0.14 | [NR] mg/dl inc  | rs780094-A   | chr2  |
| 513 | 19081515 | Mead S        | Lancet Neurol   | Creutzfeldt-Jakd | Other           | 6E-08 | NR   | NR              | rs1460163-A  | chr8  |
| 514 | 17554300 | WTCCC         | Nature          | Crohn's disease  | Other           | 3E-07 | 1.54 | [1.31-1.82]     | rs1000113-T  | chr5  |
| 515 | 21102463 | Franke A      | Nat Genet       | Crohn's disease  | Other           | 7E-09 | 1.14 | [1.09-1.19]     | rs10181042-T | chr2  |
| 516 | 17554300 | WTCCC         | Nature          | Crohn's disease  | Other           | 5E-14 | 1.19 | [1.01-1.41]     | rs10210302-T | chr2  |
| 517 | 21102463 | Franke A      | Nat Genet       | Crohn's disease  | Other           | 2E-14 | 1.14 | [1.09-1.20]     | rs10495903-T | chr2  |
| 518 | 21102463 | Franke A      | Nat Genet       | Crohn's disease  | Other           | 4E-22 | 1.23 | [1.18-1.29]     | rs10761659-G | chr10 |
| 519 | 17554300 | WTCCC         | Nature          | Crohn's disease  | Other           | 2E-06 | 1.23 | [1.05-1.45]     | rs10761659-G | chr10 |
| 520 | 17554300 | WTCCC         | Nature          | Crohn's disease  | Other           | 6E-08 | 1.2  | [1.03-1.39]     | rs10883365-G | chr10 |
| 521 | 18587394 | Barrett JC    | Nat Genet       | Crohn's disease  | Other           | 3E-10 | 1.54 | [NR]            | rs11175593-T | chr12 |
| 522 | 21102463 | Franke A      | Nat Genet       | Crohn's disease  | Other           | 1E-64 | 2.66 | [2.36-3.00]     | rs11209026-G | chr1  |
| 523 | 21102463 | Franke A      | Nat Genet       | Crohn's disease  | Other           | 6E-21 | 1.74 | [1.55-1.95]     | rs11564258-A | chr12 |
| 524 | 18587394 | Barrett JC    | Nat Genet       | Crohn's disease  | Other           | 1E-11 | 1.18 | [NR]            | rs11584383-T | chr1  |
| 525 | 21102463 | Franke A      | Nat Genet       | Crohn's disease  | Other           | 7E-36 | 1.33 | [1.27-1.39]     | rs11742570-C | chr5  |
| 526 | 18587394 | Barrett JC    | Nat Genet       | Crohn's disease  | Other           | 3E-16 | 1.33 | [NR]            | rs11747270-G | chr5  |
| 527 | 17554300 | WTCCC         | Nature          | Crohn's disease  | Other           | 6E-12 | 1.39 | [1.22-1.58]     | rs11805303-T | chr1  |
| 528 | 21102463 | Franke A      | Nat Genet       | Crohn's disease  | Other           | 1E-20 | 1.23 | [1.18-1.28]     | rs12521868-T | chr5  |
| 529 | 21102463 | Franke A      | Nat Genet       | Crohn's disease  | Other           | 3E-09 | 1.11 | [1.05-1.16]     | rs12722489-C | chr10 |
| 530 | 21102463 | Franke A      | Nat Genet       | Crohn's disease  | Other           | 9E-10 | 1.06 | [1.03-1.10]     | rs13428812-G | chr2  |
| 531 | 18587394 | Barrett JC    | Nat Genet       | Crohn's disease  | Other           | 5E-09 | 1.2  | [NR]            | rs1456893-A  | chr7  |
| 532 | 21102463 | Franke A      | Nat Genet       | Crohn's disease  | Other           | 2E-11 | 1.07 | [1.03-1.12]     | rs151181-G   | chr16 |
| 533 | 17554300 | WTCCC         | Nature          | Crohn's disease  | Other           | 4E-11 | 1.29 | [1.13-1.46]     | rs17221417-G | chr16 |
| 534 | 17554300 | WTCCC         | Nature          | Crohn's disease  | Other           | 2E-12 | 1.54 | [1.34-1.76]     | rs17234657-G | chr5  |
| 535 | 21102463 | Franke A      | Nat Genet       | Crohn's disease  | Other           | 7E-09 | 1.1  | [1.05-1.16]     | rs17309827-T | chr6  |
| 536 | 21102463 | Franke A      | Nat Genet       | Crohn's disease  | Other           | 5E-16 | 1.1  | [1.06-1.15]     | rs181359-T   | chr22 |
| 537 | 21102463 | Franke A      | Nat Genet       | Crohn's disease  | Other           | 9E-17 | 1.19 | [1.13-1.25]     | rs1819658-C  | chr10 |
| 538 | 21102463 | Franke A      | Nat Genet       | Crohn's disease  | Other           | 5E-09 | 1.07 | [1.03-1.11]     | rs1847472-G  | chr6  |
| 539 | 21102463 | Franke A      | Nat Genet       | Crohn's disease  | Other           | 1E-26 | 1.23 | [1.17-1.29]     | rs2413583-C  | chr22 |
| 540 | 18587394 | Barrett JC    | Nat Genet       | Crohn's disease  | Other           | 5E-17 | 1.35 | [NR]            | rs2542151-G  | chr18 |
| 541 | 17554300 | WTCCC         | Nature          | Crohn's disease  | Other           | 2E-07 | 1.3  | [1.14-1.48]     | rs2542151-G  | chr18 |
| 542 | 21102463 | Franke A      | Nat Genet       | Crohn's disease  | Other           | 1E-10 | 1.05 | [1.02-1.09]     | rs2549794-C  | chr5  |
| 543 | 21102463 | Franke A      | Nat Genet       | Crohn's disease  | Other           | 7E-12 | 1.07 | [1.04-1.11]     | rs281379-A   | chr19 |
| 544 | 18587394 | Barrett JC    | Nat Genet       | Crohn's disease  | Other           | 5E-09 | 1.12 | [NR]            | rs2872507-A  | chr17 |
| 545 | 21102463 | Franke A      | Nat Genet       | Crohn's disease  | Other           | 2E-14 | 1.12 | [1.07-1.17]     | rs3024505-T  | chr1  |
| 546 | 18587394 | Barrett JC    | Nat Genet       | Crohn's disease  | Other           | 2E-13 | 1.25 | [NR]            | rs3764147-G  | chr13 |
| 547 | 21102463 | Franke A      | Nat Genet       | Crohn's disease  | Other           | 1E-15 | 1.21 | [1.15-1.27]     | rs3810936-C  | chr9  |
| 548 | 18587394 | Barrett JC    | Nat Genet       | Crohn's disease  | Other           | 2E-32 | 1.25 | [NR]            | rs3828309-G  | chr2  |
| 549 | 18587394 | Barrett JC    | Nat Genet       | Crohn's disease  | Other           | 3E-10 | 1.22 | [NR]            | rs4263839-G  | chr9  |
| 550 | 17554300 | WTCCC         | Nature          | Crohn's disease  | Other           | 3E-06 | 1.55 | [1.00-2.39]     | rs6596075-C  | chr5  |
| 551 | 17554300 | WTCCC         | Nature          | Crohn's disease  | Other           | 9E-06 | 1.16 | [1.01-1.33]     | rs6601764-C  | chr10 |
| 552 | 18587394 | Barrett JC    | Nat Genet       | Crohn's disease  | Other           | 9E-10 | 1.21 | [NR]            | rs6908425-C  | chr6  |
| 553 | 21102463 | Franke A      | Nat Genet       | Crohn's disease  | Other           | 7E-12 | 1.08 | [1.04-1.13]     | rs713875-C   | chr22 |
| 554 | 21102463 | Franke A      | Nat Genet       | Crohn's disease  | Other           | 3E-13 | 1.12 | [1.07-1.18]     | rs7423615-T  | chr2  |
| 555 | 18587394 | Barrett JC    | Nat Genet       | Crohn's disease  | Other           | 7E-12 | 1.18 | [NR]            | rs744166-A   | chr17 |
| 556 | 18587394 | Barrett JC    | Nat Genet       | Crohn's disease  | Other           | 1E-09 | 1.13 | [NR]            | rs762421-G   | chr21 |
| 557 | 17554300 | WTCCC         | Nature          | Crohn's disease  | Other           | 4E-06 | 1.38 | [1.20-1.60]     | rs7807268-G  | chr7  |
| 558 | 18587394 | Barrett JC    | Nat Genet       | Crohn's disease  | Other           | 1E-09 | 1.16 | [NR]            | rs7927894-T  | chr11 |
| 559 | 21102463 | Franke A      | Nat Genet       | Crohn's disease  | Other           | 4E-18 | 1.23 | [1.16-1.31]     | rs8005161-T  | chr14 |
| 560 | 17554300 | WTCCC         | Nature          | Crohn's disease  | Other           | 2E-06 | 1.14 | [0.98-1.32]     | rs9469220-A  | chr6  |
| 561 | 17554300 | WTCCC         | Nature          | Crohn's disease  | Other           | 4E-08 | 1.09 | [0.96-1.24]     | rs9858542-A  | chr3  |
| 562 | 18723019 | Franke A      | Gastroenterolog | Crohn's disease  | Other           | 4E-06 | 1.23 | [1.04-1.45]     | rs1398024-A  | chr10 |
| 563 | 19578365 | Falchi M      | Nat Genet       | Cutaneous nevi   | Other           | 3E-08 | 0.08 | [0.002-0.16] c  | rs2284063-G  | chr22 |
| 564 | 19578365 | Falchi M      | Nat Genet       | Cutaneous nevi   | Other           | 3E-15 | 0.2  | [0.13-0.27] inc | rs4636294-A  | chr9  |
| 565 | 21993531 | Kuparinen T   | Genes Immun     | Cytomegalovirus  | Other           | 8E-06 | 0.3  | [0.17-0.43] un  | rs17077154-G | chr8  |
| 566 | 21993531 | Kuparinen T   | Genes Immun     | Cytomegalovirus  | Other           | 8E-07 | 0.33 | [0.20-0.45] un  | rs17170316-A | chr7  |
| 567 | 21993531 | Kuparinen T   | Genes Immun     | Cytomegalovirus  | Other           | 9E-06 | 0.32 | [0.18-0.47] un  | rs2086512-A  | chr6  |
| 568 | 21993531 | Kuparinen T   | Genes Immun     | Cytomegalovirus  | Other           | 3E-06 | 0.26 | [0.15-0.36] un  | rs2870137-A  | chr20 |
| 569 | 21993531 | Kuparinen T   | Genes Immun     | Cytomegalovirus  | Other           | 5E-06 | 0.21 | [0.12-0.30] un  | rs2885805-A  | chr1  |
| 570 | 21502573 | Smith NL      | Circulation     | D-dimer levels   | Other           | 2E-14 | 10.1 | [2.7-17.9] % ir | rs6687813-A  | chr1  |
| 571 | 21502573 | Smith NL      | Circulation     | D-dimer levels   | Other           | 4E-06 | 0.05 | [NR] % increas  | rs867186-G   | chr20 |
| 572 | 20800221 | Terracciano A | Biol Psychiatry | Depression-qu    | Other           | 5E-06 | 0.15 | [NR] unit incre | rs10514585-A | chr16 |
| 573 | 22233651 | Kwak SH       | Diabetes        | Diabetes (gesta  | Type 2 Diabetes | 2E-13 | 1.45 | [1.315-1.608]   | rs10830962-G | chr11 |
| 574 | 22233651 | Kwak SH       | Diabetes        | Diabetes (gesta  | Type 2 Diabetes | 2E-07 | 1.33 | [1.197-1.484]   | rs1470579-C  | chr3  |
| 575 | 22233651 | Kwak SH       | Diabetes        | Diabetes (gesta  | Type 2 Diabetes | 7E-16 | 1.52 | [1.372-1.680]   | rs7754840-C  | chr6  |
| 576 | 21150874 | McDonough CW  | Kidney Int      | Diabetic nephro  | Other           | 4E-06 | 1.75 | [1.39-2.22]     | rs2106294-T  | chr22 |
| 577 | 21150874 | McDonough CW  | Kidney Int      | Diabetic nephro  | Other           | 4E-06 | 1.33 | [1.18-1.49]     | rs2358944-G  | chr12 |
| 578 | 21150874 | McDonough CW  | Kidney Int      | Diabetic nephro  | Other           | 7E-07 | 1.31 | [1.18-1.45]     | rs6930576-A  | chr6  |
| 579 | 21150874 | McDonough CW  | Kidney Int      | Diabetic nephro  | Other           | 6E-06 | 1.32 | [1.18-1.49]     | rs773506-G   | chr9  |
| 580 | 21150874 | McDonough CW  | Kidney Int      | Diabetic nephro  | Other           | 2E-06 | 1.28 | [1.16-1.42]     | rs7769051-A  | chr6  |
| 581 | 21441570 | Grassi MA     | Hum Mol Genet   | Diabetic retinop | Other           | 7E-06 | 1.02 | [NR]            | rs11765845-A | chr7  |
| 582 | 21310492 | Huang YC      | Ophthalmology   | Diabetic retinop | Other           | 3E-15 | NR   | NR              | rs17376456-A | chr5  |



|     |          |                |                 |                    |         |        |       |               |            |              |       |
|-----|----------|----------------|-----------------|--------------------|---------|--------|-------|---------------|------------|--------------|-------|
| 583 | 21441570 | Grassi MA      | Hum Mol Genet   | Diabetic retinop   | Other   | 1E-06  | 1.16  | [NR]          |            | rs17404956-A | chr5  |
| 584 | 21310492 | Huang YC       | Ophthalmology   | Diabetic retinop   | Other   | 3E-07  | NR    | NR            |            | rs2811893-T  | chr1  |
| 585 | 21441570 | Grassi MA      | Hum Mol Genet   | Diabetic retinop   | Other   | 5E-06  | 1.35  | [NR]          |            | rs3007729-T  | chr1  |
| 586 | 21441570 | Grassi MA      | Hum Mol Genet   | Diabetic retinop   | Other   | 3E-06  | 1.35  | [NR]          |            | rs7772697-T  | chr6  |
| 587 | 21441570 | Grassi MA      | Hum Mol Genet   | Diabetic retinop   | Other   | 9E-07  | 1.02  | [NR]          |            | rs9866141-T  | chr3  |
| 588 | 19430479 | Levy D         | Nat Genet       | Diastolic blood    | Other   | 1E-06  | 0.33  | [0.19-0.47]   | mm         | rs11024074-T | chr11 |
| 589 | 21909115 | Ehret GB       | Nature          | Diastolic blood    | Other   | 9E-12  | 0.26  | [NR]          | mmHg in    | rs1173771-G  | chr5  |
| 590 | 21909115 | Ehret GB       | Nature          | Diastolic blood    | Other   | 1E-15  | 0.3   | [NR]          | mmHg in    | rs1327235-G  | chr20 |
| 591 | 21909115 | Ehret GB       | Nature          | Diastolic blood    | Other   | 3E-26  | 0.42  | [NR]          | mmHg in    | rs1378942-C  | chr15 |
| 592 | 19430483 | Newton-Cheh C  | Nat Genet       | Diastolic blood    | Other   | 1E-23  | 0.43  | [0.35-0.51]   | mm         | rs1378942-C  | chr15 |
| 593 | 19430483 | Newton-Cheh C  | Nat Genet       | Diastolic blood    | Other   | 5E-09  | 0.31  | [0.21-0.41]   | mm         | rs16948048-G | chr17 |
| 594 | 19430479 | Levy D         | Nat Genet       | Diastolic blood    | Other   | 4E-08  | 0.35  | [0.23-0.47]   | mm         | rs2384550-A  | chr12 |
| 595 | 19430483 | Newton-Cheh C  | Nat Genet       | Diastolic blood    | Other   | 3E-18  | 0.46  | [0.36-0.56]   | mm         | rs653178-T   | chr12 |
| 596 | 21909115 | Ehret GB       | Nature          | Diastolic blood    | Other   | 6E-08  | 0.3   | [NR]          | mmHg de    | rs7129220-G  | chr11 |
| 597 | 19389651 | Smith JG       | Heart Rhythm    | Electrocardiogra   | Other   | 4E-06  | 5     | [2.84-7.16]   | ms         | rs2070488-A  | chr3  |
| 598 | 19389651 | Smith JG       | Heart Rhythm    | Electrocardiogra   | Other   | 8E-06  | 4.54  | [2.58-6.50]   | ms         | rs2461751-G  | chr2  |
| 599 | 19389651 | Smith JG       | Heart Rhythm    | Electrocardiogra   | Other   | 2E-06  | 4.8   | [2.84-6.76]   | ms         | rs7638909-G  | chr3  |
| 600 | 20062063 | Holm H         | Nat Genet       | Electrocardiogra   | Other   | 5E-11  | 11.95 | [8.39-15.51]  | %          | rs3807375-T  | chr7  |
| 601 | 20062063 | Holm H         | Nat Genet       | Electrocardiogra   | Other   | 3E-13  | 7.35  | [5.37-9.33]   | %          | rs3825214-G  | chr12 |
| 602 | 20062063 | Holm H         | Nat Genet       | Electrocardiogra   | Other   | 1E-07  | 5.88  | [3.72-8.03]   | %          | rs3825214-G  | chr12 |
| 603 | 20062063 | Holm H         | Nat Genet       | Electrocardiogra   | Other   | 3E-12  | 7.36  | [5.29-9.43]   | %          | rs3825214-G  | chr12 |
| 604 | 20709820 | Kong X         | Am J Respir Cri | Emphysema-rel      | Other   | 6E-06  | 1.47  | [NR]          |            | rs2999399-T  | chr10 |
| 605 | 20709820 | Kong X         | Am J Respir Cri | Emphysema-rel      | Other   | 8E-07  | 1.85  | [NR]          | HU incre   | rs7905537-A  | chr10 |
| 606 | 20601957 | Uno S          | Nat Genet       | Endometriosis      | Other   | 2E-06  | 1.2   | [1.11-1.29]   |            | rs16826658-G | chr1  |
| 607 | 20844546 | Adachi S       | J Hum Genet     | Endometriosis      | Other   | 3E-06  | 1.5   | [1.27-1.78]   |            | rs6542095-C  | chr2  |
| 608 | 20844546 | Adachi S       | J Hum Genet     | Endometriosis      | Other   | 5E-06  | 1.65  | [1.33-2.05]   |            | rs801112-C   | chr1  |
| 609 | 19198610 | Gudbjartsson D | Nat Genet       | Eosinophil coun    | Other   | 5E-10  | 6.3   | [4.3-8.3]     | % sta      | rs12619285-G | chr2  |
| 610 | 19198610 | Gudbjartsson D | Nat Genet       | Eosinophil coun    | Other   | 1E-10  | 7.1   | [4.9-9.2]     | % sta      | rs4143832-C  | chr5  |
| 611 | 20208534 | Rothenberg ME  | Nat Genet       | Eosinophilic esc   | Other   | 2E-06  | 1.96  | [1.40-2.74]   |            | rs1032757-T  | chr5  |
| 612 | 20208534 | Rothenberg ME  | Nat Genet       | Eosinophilic esc   | Other   | 7E-06  | 1.53  | [1.21-1.93]   |            | rs11989782-A | chr8  |
| 613 | 20147318 | Qi L           | Hum Mol Genet   | E-selectin levels  | Other   | 2E-82  | 9.71  | [NR]          | % varian   | rs651007-T   | chr9  |
| 614 | 21642993 | Wu C           | Nat Genet       | Esophageal can     | Other   | 2E-19  | 1.49  | [1.37-1.61]   |            | rs10052657-C | chr5  |
| 615 | 21642993 | Wu C           | Nat Genet       | Esophageal can     | Other   | 5E-09  | 2.04  | [1.61-2.56]   |            | rs10058728-T | chr5  |
| 616 | 21642993 | Wu C           | Nat Genet       | Esophageal can     | Other   | 7E-21  | 1.38  | [1.29-1.48]   |            | rs11066015-A | chr12 |
| 617 | 21642993 | Wu C           | Nat Genet       | Esophageal can     | Other   | 2E-15  | 1.3   | [1.22-1.38]   |            | rs11066280-A | chr12 |
| 618 | 21642993 | Wu C           | Nat Genet       | Esophageal can     | Other   | 2E-31  | 1.56  | [1.45-1.68]   |            | rs2074356-T  | chr12 |
| 619 | 21642993 | Wu C           | Nat Genet       | Esophageal can     | Other   | 4E-20  | 1.34  | [1.26-1.42]   |            | rs2274223-G  | chr10 |
| 620 | 21642993 | Wu C           | Nat Genet       | Esophageal can     | Other   | 1E-11  | 1.56  | [1.37-1.78]   |            | rs8030672-A  | chr15 |
| 621 | 21642993 | Wu C           | Nat Genet       | Esophageal can     | Other   | 1E-07  | 1.19  | [1.11-1.27]   |            | rs9868873-G  | chr3  |
| 622 | 20729852 | Abnet CC       | Nat Genet       | Esophageal can     | Other   | 4E-09  | 1.36  | [1.23-1.50]   |            | rs3781264-C  | chr10 |
| 623 | 20729852 | Abnet CC       | Nat Genet       | Esophageal can     | Other   | 1E-08  | 1.3   | [1.19-1.43]   |            | rs738722-T   | chr22 |
| 624 | 21184583 | Zlojutro M     | Am J Med Gene   | Event-related br   | Other   | 9E-06  | 0.21  | [0.12-0.30]   | uV         | rs2294015-G  | chr8  |
| 625 | 19727025 | De Moor MH     | Med Sci Sports  | Exercise (leisure) | Other   | 4E-06  | 1.32  | [1.17-1.49]   |            | rs10887741-T | chr10 |
| 626 | 19727025 | De Moor MH     | Med Sci Sports  | Exercise (leisure) | Other   | 7E-06  | 1.36  | [1.19-1.56]   |            | rs8097348-G  | chr18 |
| 627 | 20585627 | Eriksson N     | PLoS Genet      | Eye color          | Other   | 3E-52  | 8.43  | [NR]          |            | rs12913832-A | chr15 |
| 628 | 20585627 | Eriksson N     | PLoS Genet      | Eye color          | Other   | 1E-300 | 2.49  | [NR]          | unit incre | rs12913832-A | chr15 |
| 629 | 20585627 | Eriksson N     | PLoS Genet      | Eye color          | Other   | 3E-09  | 0.28  | [NR]          | unit decre | rs1393350-A  | chr11 |
| 630 | 20081858 | Dupuis J       | Nat Genet       | Fasting glucose    | Insulin | 3E-43  | NR    | NR            |            | rs10830963-G | chr11 |
| 631 | 20081858 | Dupuis J       | Nat Genet       | Fasting glucose    | Insulin | 7E-22  | NR    | NR            |            | rs11708067-A | chr3  |
| 632 | 20081858 | Dupuis J       | Nat Genet       | Fasting glucose    | Insulin | 3E-12  | NR    | NR            |            | rs11708067-A | chr3  |
| 633 | 20081858 | Dupuis J       | Nat Genet       | Fasting glucose    | Insulin | 1E-08  | NR    | NR            |            | rs4506565-T  | chr10 |
| 634 | 20081858 | Dupuis J       | Nat Genet       | Fasting glucose    | Insulin | 9E-218 | NR    | NR            |            | rs560887-C   | chr2  |
| 635 | 20081858 | Dupuis J       | Nat Genet       | Fasting glucose    | Insulin | 2E-66  | NR    | NR            |            | rs560887-C   | chr2  |
| 636 | 20081858 | Dupuis J       | Nat Genet       | Fasting glucose    | Insulin | 6E-38  | NR    | NR            |            | rs780094-C   | chr2  |
| 637 | 20081858 | Dupuis J       | Nat Genet       | Fasting glucose    | Insulin | 3E-24  | NR    | NR            |            | rs780094-C   | chr2  |
| 638 | 20081858 | Dupuis J       | Nat Genet       | Fasting glucose    | Insulin | 4E-20  | NR    | NR            |            | rs780094-C   | chr2  |
| 639 | 20081858 | Dupuis J       | Nat Genet       | Fasting glucose    | Insulin | 2E-18  | NR    | NR            |            | rs7944584-A  | chr11 |
| 640 | 20081858 | Dupuis J       | Nat Genet       | Fasting insulin-l  | Insulin | 3E-24  | NR    | NR            |            | rs780094-C   | chr2  |
| 641 | 20081858 | Dupuis J       | Nat Genet       | Fasting insulin-l  | Insulin | 4E-20  | NR    | NR            |            | rs780094-C   | chr2  |
| 642 | 19060907 | Prokopenko I   | Nat Genet       | Fasting plasma     | Insulin | 3E-50  | 0.07  | [0.06-0.08]   | mm         | rs10830963-G | chr11 |
| 643 | 19060907 | Prokopenko I   | Nat Genet       | Fasting plasma     | Insulin | 1E-57  | 0.06  | [0.05-0.07]   | mm         | rs560887-C   | chr2  |
| 644 | 18451265 | Bouatia-Naji N | Science         | Fasting plasma     | Insulin | 4E-23  | 0.06  | [0.05-0.08]   | mm         | rs560887-A   | chr2  |
| 645 | 18521185 | Chen WM        | J Clin Invest   | Fasting plasma     | Insulin | 4E-07  | NR    | NR            |            | rs563694-C   | chr2  |
| 646 | 21326311 | Bhatnagar P    | J Hum Genet     | F-cell distributio | Other   | 8E-06  | 0.82  | [0.47-1.17]   | unit       | rs2577720-C  | chr2  |
| 647 | 21326311 | Bhatnagar P    | J Hum Genet     | F-cell distributio | Other   | 6E-06  | 1.2   | [0.69-1.71]   | unit       | rs3800569-C  | chr7  |
| 648 | 18245381 | Uda M          | Proc Natl Acad  | Fetal hemoglobi    | Other   | 7E-35  | 0.48  | [NR]          | s.d. decre | rs11886868-T | chr2  |
| 649 | 18245381 | Uda M          | Proc Natl Acad  | Fetal hemoglobi    | Other   | 1E-21  | 0.58  | [NR]          | s.d. decre | rs4910742-A  | chr11 |
| 650 | 20031576 | Dehghan A      | Circ Cardiovasc | Fibrinogen         | Other   | 1E-08  | 0.04  | [0.03-0.05]   | g/L        | rs1539019-A  | chr1  |
| 651 | 20031576 | Dehghan A      | Circ Cardiovasc | Fibrinogen         | Other   | 1E-15  | 0.06  | [0.04-0.08]   | g/L        | rs2522056-A  | chr5  |
| 652 | 19303062 | Tanaka T       | Am J Hum Gene   | Folate pathway     | Other   | 7E-06  | 0.29  | [0.13-0.45]   | ng         | rs153734-T   | chr3  |
| 653 | 20639881 | Conde L        | Nat Genet       | Follicular lymph   | Other   | 4E-09  | 1.81  | [1.50-2.20]   |            | rs735665-T   | chr11 |
| 654 | 17952075 | Sulem P        | Nat Genet       | Freckles           | Other   | 2E-11  | 1.32  | [1.17-1.49]   |            | rs1042602-C  | chr11 |
| 655 | 17952075 | Sulem P        | Nat Genet       | Freckles           | Other   | 4E-18  | 1.4   | [1.26-1.57]   |            | rs1540771-A  | chr6  |
| 656 | 20585627 | Eriksson N     | PLoS Genet      | Freckling          | Other   | 5E-14  | 0.77  | [NR]          | unit incre | rs619865-A   | chr20 |
| 657 | 20825314 | Baratz KH      | N Engl J Med    | Fuchs's corneal    | Other   | 1E-06  | 2.3   | [1.64-3.22]   |            | rs10490775-A | chr3  |
| 658 | 21909109 | Kim YJ         | Nat Genet       | Gamma glutam       | Other   | 9E-58  | 0.01  | [0.011-0.013] |            | rs12229654-G | chr12 |

|     |          |               |                   |                 |       |        |      |                  |              |       |
|-----|----------|---------------|-------------------|-----------------|-------|--------|------|------------------|--------------|-------|
| 659 | 21909109 | Kim YJ        | Nat Genet         | Gamma glutam    | Other | 6E-10  | 0.01 | [0.0035-0.006]   | rs12539316-C | chr7  |
| 660 | 21909109 | Kim YJ        | Nat Genet         | Gamma glutam    | Other | 3E-126 | 0.02 | [0.015-0.017]    | rs2074356-T  | chr12 |
| 661 | 21909109 | Kim YJ        | Nat Genet         | Gamma glutam    | Other | 7E-30  | 0.01 | [0.0062-0.009]   | rs2393791-G  | chr12 |
| 662 | 21909109 | Kim YJ        | Nat Genet         | Gamma glutam    | Other | 7E-53  | 0.01 | [0.0076-0.010]   | rs4820599-G  | chr22 |
| 663 | 21909109 | Kim YJ        | Nat Genet         | Gamma glutam    | Other | 1E-14  | 0    | [0.0031-0.005]   | rs4835265-T  | chr4  |
| 664 | 20363506 | Meguro A      | Ophthalmology     | Glaucoma        | Other | 3E-09  | 2.8  | [1.96-3.99]      | rs3213787-A  | chr2  |
| 665 | 20363506 | Meguro A      | Ophthalmology     | Glaucoma        | Other | 4E-06  | 1.69 | [1.36-2.11]      | rs735860-C   | chr6  |
| 666 | 19578367 | Shete S       | Nat Genet         | Glioma          | Other | 2E-17  | 1.27 | [1.19-1.37]      | rs2736100-G  | chr5  |
| 667 | 19578367 | Shete S       | Nat Genet         | Glioma          | Other | 1E-08  | 1.18 | [1.13-1.24]      | rs498872-T   | chr11 |
| 668 | 20858683 | Soranzo N     | Diabetes          | Glycated hemog  | Other | 2E-26  | 0.04 | [0.03-0.05] %    | rs1046896-T  | chr17 |
| 669 | 20858683 | Soranzo N     | Diabetes          | Glycated hemog  | Other | 1E-20  | 0.04 | [0.03-0.05] %    | rs1799884-T  | chr7  |
| 670 | 20858683 | Soranzo N     | Diabetes          | Glycated hemog  | Other | 6E-12  | 0.03 | [0.02-0.04] %    | rs4737009-A  | chr8  |
| 671 | 20858683 | Soranzo N     | Diabetes          | Glycated hemog  | Other | 8E-18  | 0.05 | [0.04-0.06] %    | rs552976-G   | chr2  |
| 672 | 20858683 | Soranzo N     | Diabetes          | Glycated hemog  | Other | 1E-08  | 0.06 | [0.04-0.08] %    | rs6474359-T  | chr8  |
| 673 | 19096518 | Pare G        | PLoS Genet        | Glycated hemog  | Other | 2E-25  | 0.05 | [NR] % increa    | rs7072268-A  | chr10 |
| 674 | 22290723 | Ryu J         | Hum Mutat         | Glycated hemog  | Other | 1E-11  | 0.05 | [NR] % decrea    | rs7747752-C  | chr6  |
| 675 | 21841780 | Chu X         | Nat Genet         | Graves' disease | Other | 7E-24  | 1.35 | [1.28-1.43]      | rs12101261-T | chr14 |
| 676 | 21900946 | Nakabayashi K | J Hum Genet       | Graves' disease | Other | 1E-13  | 1.38 | [1.27-1.50]      | rs4248154-C  | chr6  |
| 677 | 21841780 | Chu X         | Nat Genet         | Graves' disease | Other | 4E-51  | 1.77 | [1.65-1.91]      | rs4947296-C  | chr6  |
| 678 | 21841780 | Chu X         | Nat Genet         | Graves' disease | Other | 7E-33  | 1.4  | [1.32-1.48]      | rs6457617-T  | chr6  |
| 679 | 21841780 | Chu X         | Nat Genet         | Graves' disease | Other | 1E-13  | 1.24 | [1.17-1.31]      | rs6832151-G  | chr4  |
| 680 | 20585627 | Eriksson N    | PLoS Genet        | Hair color      | Other | 9E-88  | 0.97 | [NR] unit incre  | rs12913832-A | chr15 |
| 681 | 19896111 | Medland SE    | Am J Hum Gene     | Hair morphology | Other | 9E-06  | NR   | NR               | rs17605562-T | chr2  |
| 682 | 19896111 | Medland SE    | Am J Hum Gene     | Hair morphology | Other | 1E-07  | NR   | NR               | rs6732426-T  | chr2  |
| 683 | 19896111 | Medland SE    | Am J Hum Gene     | Hair morphology | Other | 4E-06  | NR   | NR               | rs908922-A   | chr1  |
| 684 | 21051773 | Scerri TS     | Hum Mol Genet     | Handedness in   | Other | 2E-08  | 0.35 | [0.23-0.47] SD   | rs11855415-A | chr15 |
| 685 | 21909109 | Kim YJ        | Nat Genet         | HDL cholesterol | Other | 8E-43  | 0.04 | [0.037-0.049]    | rs10503669-T | chr8  |
| 686 | 18193043 | Willer CJ     | Nat Genet         | HDL cholesterol | Other | 4E-19  | 2.09 | [NR] mg/dl hig   | rs10503669-A | chr8  |
| 687 | 20686565 | Teslovich TM  | Nature            | HDL cholesterol | Other | 3E-14  | 0.51 | [0.35-0.67] mg   | rs11869286-C | chr17 |
| 688 | 20864672 | Waterworth DM | Arterioscler Thro | HDL cholesterol | Other | 4E-07  | 0.02 | [0.01-0.03] un   | rs11902417-G | chr2  |
| 689 | 21909109 | Kim YJ        | Nat Genet         | HDL cholesterol | Other | 3E-23  | 0.03 | [0.023-0.033]    | rs12229654-G | chr12 |
| 690 | 21909109 | Kim YJ        | Nat Genet         | HDL cholesterol | Other | 2E-28  | 0.04 | [0.033-0.047]    | rs12708980-C | chr16 |
| 691 | 21909109 | Kim YJ        | Nat Genet         | HDL cholesterol | Other | 1E-24  | 0.02 | [0.018-0.027]    | rs16940212-T | chr15 |
| 692 | 20686565 | Teslovich TM  | Nature            | HDL cholesterol | Other | 1E-09  | 0.57 | [0.33-0.81] mg   | rs17145738-T | chr7  |
| 693 | 19060906 | Kathiresan S  | Nat Genet         | HDL cholesterol | Other | 2E-12  | 0.09 | [0.05-0.13] s.d  | rs174547-C   | chr11 |
| 694 | 20864672 | Waterworth DM | Arterioscler Thro | HDL cholesterol | Other | 1E-12  | 0.01 | [0.007-0.015]    | rs174548-G   | chr11 |
| 695 | 19060911 | Aulchenko YS  | Nat Genet         | HDL cholesterol | Other | 4E-06  | 0.06 | [NR] s.d. incre  | rs174570-G   | chr11 |
| 696 | 20031538 | Heid IM       | Circ Cardiovasc   | HDL cholesterol | Other | 3E-11  | 2.02 | [NR] mg/dl inc   | rs17482753-T | chr8  |
| 697 | 20686565 | Teslovich TM  | Nature            | HDL cholesterol | Other | 1E-15  | 1.88 | [1.41-2.35] mg   | rs1800961-T  | chr20 |
| 698 | 19060906 | Kathiresan S  | Nat Genet         | HDL cholesterol | Other | 8E-10  | 0.19 | [0.09-0.29] s.d  | rs1800961-T  | chr20 |
| 699 | 21909109 | Kim YJ        | Nat Genet         | HDL cholesterol | Other | 6E-06  | 0.02 | [0.012-0.029]    | rs2072134-A  | chr12 |
| 700 | 21909109 | Kim YJ        | Nat Genet         | HDL cholesterol | Other | 7E-37  | 0.04 | [0.030-0.040]    | rs2074356-T  | chr12 |
| 701 | 18193043 | Willer CJ     | Nat Genet         | HDL cholesterol | Other | 3E-14  | 1.11 | [NR] mg/dl hig   | rs2144300-T  | chr1  |
| 702 | 20864672 | Waterworth DM | Arterioscler Thro | HDL cholesterol | Other | 2E-12  | 0.03 | [0.02-0.04] un   | rs2156552-T  | chr18 |
| 703 | 18193044 | Kathiresan S  | Nat Genet         | HDL cholesterol | Other | 2E-07  | 0.07 | [0.05-0.09] %    | rs2156552-A  | chr18 |
| 704 | 18193043 | Willer CJ     | Nat Genet         | HDL cholesterol | Other | 6E-12  | 1.2  | [NR] mg/dl hig   | rs2156552-T  | chr18 |
| 705 | 19060911 | Aulchenko YS  | Nat Genet         | HDL cholesterol | Other | 8E-16  | 0.13 | [NR] s.d. decre  | rs2271293-G  | chr16 |
| 706 | 19060906 | Kathiresan S  | Nat Genet         | HDL cholesterol | Other | 9E-13  | 0.07 | [0.01-0.13] s.d  | rs2271293-A  | chr16 |
| 707 | 19060906 | Kathiresan S  | Nat Genet         | HDL cholesterol | Other | 1E-10  | 0.07 | [0.03-0.11] s.d  | rs2338104-C  | chr12 |
| 708 | 18193043 | Willer CJ     | Nat Genet         | HDL cholesterol | Other | 3E-08  | 0.48 | [NR] mg/dl hig   | rs2338104-G  | chr12 |
| 709 | 18193043 | Willer CJ     | Nat Genet         | HDL cholesterol | Other | 1E-07  | 0.74 | [NR] mg/dl hig   | rs255052-A   | chr16 |
| 710 | 20686565 | Teslovich TM  | Nature            | HDL cholesterol | Other | 4E-09  | 0.49 | [0.29-0.69] mg   | rs2814944-A  | chr6  |
| 711 | 20686565 | Teslovich TM  | Nature            | HDL cholesterol | Other | 5E-08  | 0.41 | [0.21-0.61] mg   | rs2923084-G  | chr11 |
| 712 | 19060906 | Kathiresan S  | Nat Genet         | HDL cholesterol | Other | 1E-08  | 0.12 | [0.04-0.20] s.d  | rs2967605-T  | chr19 |
| 713 | 20864672 | Waterworth DM | Arterioscler Thro | HDL cholesterol | Other | 5E-07  | 0.02 | [0.01-0.03] un   | rs3890182-G  | chr9  |
| 714 | 18193044 | Kathiresan S  | Nat Genet         | HDL cholesterol | Other | 3E-10  | 0.01 | [0.06-0.14] %    | rs3890182-A  | chr9  |
| 715 | 19060911 | Aulchenko YS  | Nat Genet         | HDL cholesterol | Other | 9E-13  | 0.11 | [NR] s.d. incre  | rs3905000-G  | chr9  |
| 716 | 18193043 | Willer CJ     | Nat Genet         | HDL cholesterol | Other | 1E-10  | 0.82 | [NR] mg/dl hig   | rs4149268-C  | chr9  |
| 717 | 20686565 | Teslovich TM  | Nature            | HDL cholesterol | Other | 4E-21  | 1.06 | [0.82-1.3] mg/   | rs4420638-G  | chr19 |
| 718 | 20686565 | Teslovich TM  | Nature            | HDL cholesterol | Other | 4E-10  | 0.48 | [0.3-0.66] mg/   | rs4660293-G  | chr1  |
| 719 | 19060906 | Kathiresan S  | Nat Genet         | HDL cholesterol | Other | 3E-10  | 0.08 | [0.02-0.14] s.d  | rs471364-C   | chr9  |
| 720 | 20686565 | Teslovich TM  | Nature            | HDL cholesterol | Other | 3E-10  | 0.44 | [0.28-0.6] mg/   | rs4765127-T  | chr12 |
| 721 | 18193043 | Willer CJ     | Nat Genet         | HDL cholesterol | Other | 3E-20  | 1.38 | [NR] mg/dl hig   | rs4775041-C  | chr15 |
| 722 | 20686565 | Teslovich TM  | Nature            | HDL cholesterol | Other | 4E-21  | 0.61 | [0.47-0.75] mg   | rs4846914-G  | chr1  |
| 723 | 19060906 | Kathiresan S  | Nat Genet         | HDL cholesterol | Other | 4E-08  | 0.05 | [0.01-0.09] s.d  | rs4846914-G  | chr1  |
| 724 | 18193044 | Kathiresan S  | Nat Genet         | HDL cholesterol | Other | 2E-13  | 0.07 | [0.05-0.09] %    | rs4846914-G  | chr1  |
| 725 | 19060911 | Aulchenko YS  | Nat Genet         | HDL cholesterol | Other | 2E-11  | 0.1  | [NR] s.d. incre  | rs4939883-G  | chr18 |
| 726 | 19060906 | Kathiresan S  | Nat Genet         | HDL cholesterol | Other | 7E-15  | 0.14 | [0.10-0.18] s.d  | rs4939883-T  | chr18 |
| 727 | 21909109 | Kim YJ        | Nat Genet         | HDL cholesterol | Other | 8E-11  | 0.02 | [0.012-0.023]    | rs519113-C   | chr19 |
| 728 | 20864672 | Waterworth DM | Arterioscler Thro | HDL cholesterol | Other | 7E-09  | 0.01 | [0.009-0.017]    | rs643531-C   | chr9  |
| 729 | 20031538 | Heid IM       | Circ Cardiovasc   | HDL cholesterol | Other | 5E-10  | 2.27 | [NR] mg/dl decre | rs7240405-A  | chr18 |
| 730 | 19060911 | Aulchenko YS  | Nat Genet         | HDL cholesterol | Other | 6E-11  | 0.07 | [NR] s.d. decre  | rs7395662-G  | chr11 |
| 731 | 20686565 | Teslovich TM  | Nature            | HDL cholesterol | Other | 3E-14  | 0.61 | [0.43-0.79] mg   | rs838880-C   | chr12 |
| 732 | 20864672 | Waterworth DM | Arterioscler Thro | HDL cholesterol | Other | 2E-11  | 0.03 | [0.02-0.04] un   | rs964184-G   | chr11 |
| 733 | 20686565 | Teslovich TM  | Nature            | HDL cholesterol | Other | 5E-47  | 1.5  | [1.28-1.72] mg   | rs964184-G   | chr11 |
| 734 | 19060906 | Kathiresan S  | Nat Genet         | HDL cholesterol | Other | 1E-12  | 0.17 | [0.11-0.23] s.d  | rs964184-G   | chr11 |

|     |          |                |                   |                 |       |       |      |                 |              |       |
|-----|----------|----------------|-------------------|-----------------|-------|-------|------|-----------------|--------------|-------|
| 735 | 19060910 | Sabatti C      | Nat Genet         | HDL cholesterol | Other | 2E-07 | 0.05 | [0.048-0.051]   | rs9891572-A  | chr17 |
| 736 | 20864672 | Watenworth DM  | Arterioscler Thro | HDL cholesterol | Other | 1E-32 | 0.04 | [0.03-0.05] un  | rs9989419-G  | chr16 |
| 737 | 20031538 | Heid IM        | Circ Cardiovasc   | HDL cholesterol | Other | 9E-27 | 2.66 | [NR] mg/dl dec  | rs9989419-A  | chr16 |
| 738 | 18193043 | Willer CJ      | Nat Genet         | HDL cholesterol | Other | 3E-31 | 1.72 | [NR] mg/dl hig  | rs9989419-G  | chr16 |
| 739 | 20881960 | Lango Allen H  | Nature            | Height          | Other | 2E-18 | 0.03 | [NR] unit incre | rs10037512-T | chr5  |
| 740 | 18391950 | Lettre G       | Nat Genet         | Height          | Other | 3E-20 | 0.48 | [0.58-1.09] cm  | rs1042725-T  | chr12 |
| 741 | 18391952 | Weedon MN      | Nat Genet         | Height          | Other | 3E-18 | 0.05 | [0.03-0.08] s.d | rs1042725-C  | chr12 |
| 742 | 17767157 | Weedon MN      | Nat Genet         | Height          | Other | 6E-16 | 0.4  | [NR] cm per c   | rs1042725-C  | chr12 |
| 743 | 18391952 | Weedon MN      | Nat Genet         | Height          | Other | 4E-11 | 0.05 | [0.02-0.07] s.d | rs10512248-G | chr9  |
| 744 | 19893584 | Kim JJ         | J Hum Genet       | Height          | Other | 8E-08 | 0.49 | [NR] cm incre   | rs10513137-A | chr3  |
| 745 | 19396169 | Cho YS         | Nat Genet         | Height          | Other | 6E-12 | 0.46 | [0.33-0.59] cm  | rs10513137-A | chr3  |
| 746 | 18391951 | Gudbjartsson D | Nat Genet         | Height          | Other | 1E-06 | 6.9  | [4.16-9.64] %   | rs1052483-C  | chr2  |
| 747 | 19030899 | Lei SF         | Hum Genet         | Height          | Other | 2E-06 | NR   | NR              | rs10816533-C | chr9  |
| 748 | 20397748 | Liu JZ         | Twin Res Hum C    | Height          | Other | 5E-07 | 0.07 | [0.03-0.11] SD  | rs10906982-A | chr15 |
| 749 | 18391952 | Weedon MN      | Nat Genet         | Height          | Other | 2E-08 | 0.05 | [0.02-0.07] s.d | rs10906982-A | chr15 |
| 750 | 18391952 | Weedon MN      | Nat Genet         | Height          | Other | 7E-08 | 0.06 | [0.03-0.09] s.d | rs10935120-A | chr3  |
| 751 | 19893584 | Kim JJ         | J Hum Genet       | Height          | Other | 2E-06 | 0.4  | [NR] cm decre   | rs10961780-G | chr9  |
| 752 | 18391952 | Weedon MN      | Nat Genet         | Height          | Other | 6E-10 | 0.04 | [0.01-0.07] s.d | rs11107116-G | chr12 |
| 753 | 22021425 | Carty CL       | Hum Mol Genet     | Height          | Other | 5E-10 | 0.05 | [0.029-0.069]   | rs11658329-G | chr17 |
| 754 | 21998595 | N'Diaye A      | PLoS Genet        | Height          | Other | 6E-10 | 0.05 | [0.035-0.071]   | rs11658329-C | chr17 |
| 755 | 20881960 | Lango Allen H  | Nature            | Height          | Other | 1E-13 | 0.03 | [NR] unit decre | rs11684404-T | chr2  |
| 756 | 20966902 | Croteau-Chonka | Obesity (Silver S | Height          | Other | 2E-06 | 1.05 | [0.62-1.48] cm  | rs11888559-T | chr2  |
| 757 | 19893584 | Kim JJ         | J Hum Genet       | Height          | Other | 6E-06 | 0.36 | [NR] cm decre   | rs11989122-T | chr8  |
| 758 | 18391951 | Gudbjartsson D | Nat Genet         | Height          | Other | 7E-07 | 4.4  | [2.64-6.16] %   | rs12199222-T | chr6  |
| 759 | 21998595 | N'Diaye A      | PLoS Genet        | Height          | Other | 5E-06 | 0.05 | [0.030-0.074]   | rs12321906-T | chr12 |
| 760 | 18391951 | Gudbjartsson D | Nat Genet         | Height          | Other | 8E-06 | 3.8  | [2.23-5.37] %   | rs1239947-G  | chr13 |
| 761 | 18391950 | Lettre G       | Nat Genet         | Height          | Other | 2E-06 | 0.25 | [0.15-0.35] cm  | rs12449568-C | chr17 |
| 762 | 20881960 | Lango Allen H  | Nature            | Height          | Other | 3E-13 | 0.03 | [NR] meters in  | rs12474201-A | chr2  |
| 763 | 20881960 | Lango Allen H  | Nature            | Height          | Other | 2E-14 | 0.03 | [NR] unit incre | rs12680655-C | chr8  |
| 764 | 18391952 | Weedon MN      | Nat Genet         | Height          | Other | 4E-11 | 0.08 | [0.05-0.11] s.d | rs12735613-A | chr1  |
| 765 | 18391950 | Lettre G       | Nat Genet         | Height          | Other | 3E-08 | 0.31 | [0.21-0.46] cm  | rs12986413-T | chr19 |
| 766 | 19893584 | Kim JJ         | J Hum Genet       | Height          | Other | 3E-06 | 0.75 | [NR] cm decre   | rs13273123-C | chr8  |
| 767 | 19396169 | Cho YS         | Nat Genet         | Height          | Other | 1E-09 | 0.71 | [0.48-0.94] cm  | rs13273123-G | chr8  |
| 768 | 20881960 | Lango Allen H  | Nature            | Height          | Other | 2E-14 | 0.03 | [NR] unit incre | rs1351164-T  | chr2  |
| 769 | 18391952 | Weedon MN      | Nat Genet         | Height          | Other | 5E-09 | 0.04 | [0.01-0.08] s.d | rs1390401-A  | chr1  |
| 770 | 19570815 | Estrada K      | Hum Mol Genet     | Height          | Other | 2E-07 | 0.25 | [0.03-0.47] cm  | rs139909-T   | chr22 |
| 771 | 19893584 | Kim JJ         | J Hum Genet       | Height          | Other | 9E-07 | 0.56 | [NR] cm decre   | rs1520223-C  | chr12 |
| 772 | 22021425 | Carty CL       | Hum Mol Genet     | Height          | Other | 6E-09 | 0.05 | [0.024-0.072]   | rs1549519-T  | chr17 |
| 773 | 20881960 | Lango Allen H  | Nature            | Height          | Other | 2E-10 | 0.02 | [NR] meters d   | rs1582931-A  | chr5  |
| 774 | 20189936 | Okada Y        | Hum Mol Genet     | Height          | Other | 5E-06 | 0.05 | [0.03-0.07] cm  | rs16859517-T | chr2  |
| 775 | 19893584 | Kim JJ         | J Hum Genet       | Height          | Other | 3E-06 | 0.53 | [NR] cm decre   | rs16910061-T | chr9  |
| 776 | 19396169 | Cho YS         | Nat Genet         | Height          | Other | 5E-07 | 0.3  | [0.18-0.42] cm  | rs17038182-C | chr1  |
| 777 | 20881960 | Lango Allen H  | Nature            | Height          | Other | 5E-16 | 0.03 | [NR] unit incre | rs17318596-A | chr19 |
| 778 | 20881960 | Lango Allen H  | Nature            | Height          | Other | 2E-11 | 0.04 | [NR] meters in  | rs17391694-T | chr1  |
| 779 | 20881960 | Lango Allen H  | Nature            | Height          | Other | 3E-09 | 0.02 | [NR] meters d   | rs1741344-T  | chr20 |
| 780 | 20881960 | Lango Allen H  | Nature            | Height          | Other | 2E-18 | 0.06 | [NR] unit decre | rs17511102-A | chr2  |
| 781 | 20881960 | Lango Allen H  | Nature            | Height          | Other | 4E-11 | 0.03 | [NR] meters d   | rs17782313-T | chr18 |
| 782 | 22021425 | Carty CL       | Hum Mol Genet     | Height          | Other | 7E-10 | 0.04 | [0.024-0.064]   | rs1787200-T  | chr18 |
| 783 | 21998595 | N'Diaye A      | PLoS Genet        | Height          | Other | 1E-10 | 0.05 | [0.037-0.069]   | rs1787200-A  | chr18 |
| 784 | 20397748 | Liu JZ         | Twin Res Hum C    | Height          | Other | 1E-09 | 0.12 | [0.07-0.17] SD  | rs1812175-C  | chr4  |
| 785 | 18391951 | Gudbjartsson D | Nat Genet         | Height          | Other | 1E-11 | 8.3  | [5.95-10.65]    | rs1812175-C  | chr4  |
| 786 | 19893584 | Kim JJ         | J Hum Genet       | Height          | Other | 3E-06 | 0.4  | [NR] cm incre   | rs2079795-T  | chr17 |
| 787 | 18391951 | Gudbjartsson D | Nat Genet         | Height          | Other | 1E-08 | 5.8  | [3.84-7.76] %   | rs2282978-C  | chr7  |
| 788 | 18391952 | Weedon MN      | Nat Genet         | Height          | Other | 8E-23 | 0.09 | [0.06-0.12] s.d | rs2282978-C  | chr7  |
| 789 | 19893584 | Kim JJ         | J Hum Genet       | Height          | Other | 8E-06 | 0.51 | [NR] cm decre   | rs2292303-C  | chr12 |
| 790 | 19893584 | Kim JJ         | J Hum Genet       | Height          | Other | 8E-06 | 1.9  | [NR] cm incre   | rs2315504-C  | chr17 |
| 791 | 21998595 | N'Diaye A      | PLoS Genet        | Height          | Other | 6E-08 | 0.06 | [0.036-0.076]   | rs2553026-A  | chr2  |
| 792 | 18391950 | Lettre G       | Nat Genet         | Height          | Other | 6E-08 | 0.34 | [0.21-0.48] cm  | rs2562784-G  | chr15 |
| 793 | 18391951 | Gudbjartsson D | Nat Genet         | Height          | Other | 9E-07 | 5.4  | [3.24-7.56] %   | rs2814828-T  | chr9  |
| 794 | 18391952 | Weedon MN      | Nat Genet         | Height          | Other | 4E-12 | 0.09 | [0.05-0.13] s.d | rs2814993-A  | chr6  |
| 795 | 21998595 | N'Diaye A      | PLoS Genet        | Height          | Other | 5E-08 | 0.05 | [0.033-0.073]   | rs2854160-T  | chr17 |
| 796 | 20881960 | Lango Allen H  | Nature            | Height          | Other | 7E-09 | 0.02 | [NR] meters d   | rs3110496-A  | chr17 |
| 797 | 18391951 | Gudbjartsson D | Nat Genet         | Height          | Other | 8E-06 | 4.8  | [2.64-6.96] %   | rs31198-T    | chr5  |
| 798 | 18391951 | Gudbjartsson D | Nat Genet         | Height          | Other | 5E-14 | 6.5  | [5.44-9.36] %   | rs3748069-A  | chr6  |
| 799 | 20881960 | Lango Allen H  | Nature            | Height          | Other | 4E-13 | 0.06 | [NR] unit decre | rs3782089-T  | chr11 |
| 800 | 20397748 | Liu JZ         | Twin Res Hum C    | Height          | Other | 3E-07 | 0.09 | [0.04-0.14] SD  | rs3791675-C  | chr2  |
| 801 | 19893584 | Kim JJ         | J Hum Genet       | Height          | Other | 4E-06 | 0.45 | [NR] cm incre   | rs3791675-G  | chr2  |
| 802 | 19396169 | Cho YS         | Nat Genet         | Height          | Other | 2E-09 | 0.42 | [0.28-0.56] cm  | rs3791675-G  | chr2  |
| 803 | 18391952 | Weedon MN      | Nat Genet         | Height          | Other | 2E-12 | 0.09 | [0.05-0.12] s.d | rs3791675-C  | chr2  |
| 804 | 22021425 | Carty CL       | Hum Mol Genet     | Height          | Other | 3E-08 | 0.06 | [0.029-0.083]   | rs3889237-C  | chr17 |
| 805 | 19893584 | Kim JJ         | J Hum Genet       | Height          | Other | 7E-06 | 0.37 | [NR] cm decre   | rs41464348-T | chr2  |
| 806 | 18391951 | Gudbjartsson D | Nat Genet         | Height          | Other | 3E-08 | 5.6  | [3.64-7.56] %   | rs4533267-A  | chr15 |
| 807 | 18391952 | Weedon MN      | Nat Genet         | Height          | Other | 5E-13 | 0.06 | [0.03-0.08] s.d | rs4549631-C  | chr6  |
| 808 | 20881960 | Lango Allen H  | Nature            | Height          | Other | 2E-12 | 0.03 | [NR] meters d   | rs4601530-T  | chr1  |
| 809 | 18391951 | Gudbjartsson D | Nat Genet         | Height          | Other | 4E-08 | 6.8  | [4.45-9.15] %   | rs4713858-G  | chr6  |
| 810 | 18391951 | Gudbjartsson D | Nat Genet         | Height          | Other | 2E-08 | 5.3  | [3.54-7.06] %   | rs4743034-A  | chr9  |

|     |          |                |                   |                  |                  |       |      |                  |              |       |
|-----|----------|----------------|-------------------|------------------|------------------|-------|------|------------------|--------------|-------|
| 811 | 18391951 | Gudbjartsson D | Nat Genet         | Height           | Other            | 1E-07 | 3.6  | [2.23-4.97] %    | rs4794665-A  | chr17 |
| 812 | 19893584 | Kim JJ         | J Hum Genet       | Height           | Other            | 6E-06 | 0.7  | [NR] cm incre    | rs4811971-C  | chr20 |
| 813 | 20189936 | Okada Y        | Hum Mol Genet     | Height           | Other            | 1E-07 | 0.06 | [0.04-0.08] cm   | rs4842838-G  | chr15 |
| 814 | 20189936 | Okada Y        | Hum Mol Genet     | Height           | Other            | 8E-08 | 0.06 | [0.04-0.08] cm   | rs4886707-T  | chr15 |
| 815 | 18391950 | Lettre G       | Nat Genet         | Height           | Other            | 1E-16 | 0.44 | [0.34-0.72] cm   | rs6060369-C  | chr20 |
| 816 | 18193045 | Sanna S        | Nat Genet         | Height           | Other            | 2E-16 | 0.44 | [NR] cm taller   | rs6060369-C  | chr20 |
| 817 | 18391952 | Weedon MN      | Nat Genet         | Height           | Other            | 2E-17 | 0.08 | [0.05-0.11] s.d  | rs6060373-A  | chr20 |
| 818 | 18391951 | Gudbjartsson D | Nat Genet         | Height           | Other            | 8E-07 | 4.7  | [2.74-6.66] %    | rs6088792-T  | chr20 |
| 819 | 21998595 | N'Diaye A      | PLoS Genet        | Height           | Other            | 7E-07 | 0.04 | [0.025-0.057] %  | rs6435999-A  | chr2  |
| 820 | 20881960 | Lango Allen H  | Nature            | Height           | Other            | 9E-15 | 0.03 | [NR] unit decre  | rs6439167-T  | chr3  |
| 821 | 20189936 | Okada Y        | Hum Mol Genet     | Height           | Other            | 6E-06 | 0.05 | [0.03-0.07] cm   | rs6563943-A  | chr16 |
| 822 | 20881960 | Lango Allen H  | Nature            | Height           | Other            | 1E-21 | 0.04 | [NR] unit decre  | rs6569648-T  | chr6  |
| 823 | 20397748 | Liu JZ         | Twin Res Hum G    | Height           | Other            | 2E-07 | 0.08 | [0.04-0.12] SD   | rs6570507-G  | chr6  |
| 824 | 18391952 | Weedon MN      | Nat Genet         | Height           | Other            | 2E-08 | 0.05 | [0.02-0.08] s.d  | rs6686842-C  | chr1  |
| 825 | 20881960 | Lango Allen H  | Nature            | Height           | Other            | 5E-09 | 0.02 | [NR] meters in   | rs6699417-T  | chr1  |
| 826 | 18391952 | Weedon MN      | Nat Genet         | Height           | Other            | 2E-08 | 0.06 | [0.02-0.10] s.d  | rs6724465-A  | chr2  |
| 827 | 18391951 | Gudbjartsson D | Nat Genet         | Height           | Other            | 3E-08 | 5.4  | [3.44-7.36] %    | rs678962-G   | chr1  |
| 828 | 20397748 | Liu JZ         | Twin Res Hum G    | Height           | Other            | 8E-06 | 0.09 | [0.04-0.14] SD   | rs6830062-T  | chr4  |
| 829 | 18391951 | Gudbjartsson D | Nat Genet         | Height           | Other            | 1E-10 | 6.3  | [4.34-8.26] %    | rs6830062-T  | chr4  |
| 830 | 18391952 | Weedon MN      | Nat Genet         | Height           | Other            | 2E-09 | 0.06 | [0.03-0.08] s.d  | rs6854783-A  | chr4  |
| 831 | 19893584 | Kim JJ         | J Hum Genet       | Height           | Other            | 2E-08 | 0.55 | [NR] cm incre    | rs6918981-G  | chr6  |
| 832 | 19396169 | Cho YS         | Nat Genet         | Height           | Other            | 3E-08 | 0.4  | [0.26-0.54] cm   | rs6918981-G  | chr6  |
| 833 | 19893584 | Kim JJ         | J Hum Genet       | Height           | Other            | 3E-06 | 1.32 | [NR] cm incre    | rs7032940-A  | chr9  |
| 834 | 20881960 | Lango Allen H  | Nature            | Height           | Other            | 9E-10 | 0.02 | [NR] meters d    | rs7112925-T  | chr11 |
| 835 | 18391951 | Gudbjartsson D | Nat Genet         | Height           | Other            | 1E-10 | 5.7  | [3.94-7.46] %    | rs7153027-A  | chr14 |
| 836 | 18391950 | Lettre G       | Nat Genet         | Height           | Other            | 8E-22 | 0.37 | [0.29-0.45] cm   | rs724016-G   | chr3  |
| 837 | 18193045 | Sanna S        | Nat Genet         | Height           | Other            | 1E-06 | 0.61 | [NR] cm taller   | rs724016-G   | chr3  |
| 838 | 21998595 | N'Diaye A      | PLoS Genet        | Height           | Other            | 2E-06 | 0.04 | [0.023-0.059] %  | rs733254-A   | chr8  |
| 839 | 18391951 | Gudbjartsson D | Nat Genet         | Height           | Other            | 1E-06 | 8.7  | [5.17-12.23] %   | rs749052-A   | chr2  |
| 840 | 20189936 | Okada Y        | Hum Mol Genet     | Height           | Other            | 9E-09 | 0.06 | [0.04-0.08] cm   | rs7571816-A  | chr2  |
| 841 | 20881960 | Lango Allen H  | Nature            | Height           | Other            | 2E-14 | 0.03 | [NR] unit incre  | rs7697556-T  | chr4  |
| 842 | 20189936 | Okada Y        | Hum Mol Genet     | Height           | Other            | 8E-10 | 0.12 | [0.08-0.16] cm   | rs7833986-A  | chr8  |
| 843 | 18391951 | Gudbjartsson D | Nat Genet         | Height           | Other            | 5E-08 | 5    | [3.24-6.76] %    | rs7846385-C  | chr8  |
| 844 | 20881960 | Lango Allen H  | Nature            | Height           | Other            | 2E-08 | 0.02 | [NR] meters in   | rs7864648-T  | chr9  |
| 845 | 22021425 | Carty CL       | Hum Mol Genet     | Height           | Other            | 4E-10 | 0.04 | [0.025-0.061] %  | rs7968682-T  | chr12 |
| 846 | 18391951 | Gudbjartsson D | Nat Genet         | Height           | Other            | 7E-15 | 5.9  | [6.03-8.77] %    | rs798544-G   | chr7  |
| 847 | 20189936 | Okada Y        | Hum Mol Genet     | Height           | Other            | 3E-06 | 0.05 | [0.03-0.07] cm   | rs8002779-A  | chr13 |
| 848 | 18391952 | Weedon MN      | Nat Genet         | Height           | Other            | 8E-08 | 0.04 | [0.01-0.06] s.d  | rs8041863-A  | chr15 |
| 849 | 18391952 | Weedon MN      | Nat Genet         | Height           | Other            | 3E-07 | 0.05 | [0.02-0.08] s.d  | rs8099594-A  | chr18 |
| 850 | 20881960 | Lango Allen H  | Nature            | Height           | Other            | 2E-12 | 0.03 | [NR] meters d    | rs891088-A   | chr19 |
| 851 | 22021425 | Carty CL       | Hum Mol Genet     | Height           | Other            | 3E-14 | 0.06 | [0.036-0.076] %  | rs925098-G   | chr4  |
| 852 | 18391951 | Gudbjartsson D | Nat Genet         | Height           | Other            | 2E-08 | 4.3  | [2.73-5.87] %    | rs967417-C   | chr20 |
| 853 | 20189936 | Okada Y        | Hum Mol Genet     | Height           | Other            | 6E-09 | 0.07 | [0.05-0.09] cm   | rs9825379-A  | chr3  |
| 854 | 20881960 | Lango Allen H  | Nature            | Height           | Other            | 4E-13 | 0.03 | [NR] unit decre  | rs9863706-T  | chr3  |
| 855 | 19862010 | Ganesh SK      | Nat Genet         | Hematocrit       | Other            | 6E-15 | 0.2  | [0.15-0.25] %    | rs10224002-G | chr7  |
| 856 | 19862010 | Ganesh SK      | Nat Genet         | Hematocrit       | Other            | 2E-13 | 0.17 | [0.13-0.22] %    | rs2413450-T  | chr22 |
| 857 | 20139978 | Kamatani Y     | Nat Genet         | Hematological a  | Other            | 3E-08 | 0.3  | [NR] % varian    | rs2280401-A  | chr19 |
| 858 | 20139978 | Kamatani Y     | Nat Genet         | Hematological a  | Other            | 3E-08 | 0.21 | [NR] % varian    | rs2736100-G  | chr15 |
| 859 | 20139978 | Kamatani Y     | Nat Genet         | Hematological a  | Other            | 7E-09 | 0.22 | [NR] % varian    | rs3094212-C  | chr6  |
| 860 | 20139978 | Kamatani Y     | Nat Genet         | Hematological a  | Other            | 4E-08 | 0.21 | [NR] % varian    | rs470119-T   | chr22 |
| 861 | 20139978 | Kamatani Y     | Nat Genet         | Hematological a  | Other            | 2E-09 | 0.25 | [NR] % varian    | rs4895441-G  | chr6  |
| 862 | 20139978 | Kamatani Y     | Nat Genet         | Hematological a  | Other            | 1E-08 | 0.22 | [NR] % varian    | rs6092477-G  | chr20 |
| 863 | 20139978 | Kamatani Y     | Nat Genet         | Hematological a  | Other            | 3E-08 | 0.21 | [NR] % varian    | rs7843479-A  | chr8  |
| 864 | 20139978 | Kamatani Y     | Nat Genet         | Hematological a  | Other            | 1E-11 | 0.32 | [NR] % varian    | rs9820070-C  | chr3  |
| 865 | 19820697 | Soranzo N      | Nat Genet         | Hematological p  | Other            | 7E-19 | 0.58 | [0.44-0.70] fl i | rs11970772-T | chr6  |
| 866 | 19862010 | Ganesh SK      | Nat Genet         | Hemoglobin       | Other            | 3E-15 | 0.07 | [0.05-0.09] g/d  | rs10224002-G | chr7  |
| 867 | 22004137 | Liu L          | Viral Immunol     | Hepatitis B      | Other            | 2E-08 | 1.68 | [1.40-2.02] %    | rs11866328-G | chr16 |
| 868 | 21750111 | Mbarek H       | Hum Mol Genet     | Hepatitis B      | Other            | 2E-61 | 1.87 | [1.73-2.01] %    | rs3077-G     | chr6  |
| 869 | 21750111 | Mbarek H       | Hum Mol Genet     | Hepatitis B      | Other            | 6E-28 | 1.81 | [1.62-2.01] %    | rs7453920-G  | chr6  |
| 870 | 20676096 | Zhang H        | Nat Genet         | Hepatocellular c | Other            | 2E-18 | 1.64 | [1.49-1.82] %    | rs17401966-A | chr1  |
| 871 | 21499248 | Kumar V        | Nat Genet         | Hepatocellular c | Other            | 6E-09 | 1.3  | [1.19-1.42] %    | rs9275572-A  | chr6  |
| 872 | 18776929 | Liu YZ         | PLoS One          | Hip bone size    | Other            | 2E-06 | 5    | [NR] cm2 incre   | rs7595412-A  | chr2  |
| 873 | 19196962 | Garcia-Barcelo | Proc Natl Acad    | Hirschsprung's d | Other            | 2E-08 | 1.68 | [1.40-2.00] %    | rs16879552-G | chr8  |
| 874 | 19196962 | Garcia-Barcelo | Proc Natl Acad    | Hirschsprung's d | Other            | 4E-18 | NR   |                  | rs2742234-T  | chr10 |
| 875 | 21051598 | Pereyra F      | Science           | HIV-1 control    | Other            | 4E-16 | 2.1  | [NR]             | rs3131018-C  | chr6  |
| 876 | 21909115 | Ehret GB       | Nature            | Hypertension     | Other            | 3E-10 | 0.06 | [NR] unit incre  | rs1173771-G  | chr5  |
| 877 | 21082022 | Padmanabhan S  | PLoS Genet        | Hypertension     | Other            | 4E-11 | 1.15 | [1.10-1.19] %    | rs13333226-A | chr16 |
| 878 | 19430479 | Levy D         | Nat Genet         | Hypertension     | Other            | 2E-07 | 0.13 | [0.09-0.17] de   | rs16982520-A | chr20 |
| 879 | 17554300 | WTCCC          | Nature            | Hypertension     | Other            | 6E-06 | 1.31 | [1.03-1.67] %    | rs2398162-A  | chr15 |
| 880 | 17554300 | WTCCC          | Nature            | Hypertension     | Other            | 8E-07 | 1.54 | [1.03-2.31] %    | rs2820037-T  | chr1  |
| 881 | 19609347 | Adeyemo A      | PLoS Genet        | Hypertension     | Other            | 5E-06 | 1.62 | [NR]             | rs991316-T   | chr4  |
| 882 | 20657596 | Johansen CT    | Nat Genet         | Hypertriglycerid | Hypertriglycerid | 5E-24 | 3.28 | [2.61-4.14] %    | rs964184-G   | chr11 |
| 883 | 18835860 | Mushiroda T    | J Med Genet       | Idiopathic pulmo | Other            | 3E-08 | 2.11 | [1.61-2.78] %    | rs2736100-A  | chr5  |
| 884 | 22197929 | Yu XQ          | Nat Genet         | IgA nephropathy  | Other            | 1E-11 | 1.28 | [1.19-1.39] %    | rs12537-C    | chr22 |
| 885 | 22197929 | Yu XQ          | Nat Genet         | IgA nephropathy  | Other            | 4E-07 | 1.15 | [1.09-1.22] %    | rs4849121-G  | chr2  |
| 886 | 22036096 | Ramasamy A     | J Allergy Clin Im | IgE grass sensit | Other            | 2E-06 | 1.18 | [1.10-1.26] %    | rs631208-A   | chr16 |

|     |          |                 |                   |                     |         |        |      |                 |              |       |
|-----|----------|-----------------|-------------------|---------------------|---------|--------|------|-----------------|--------------|-------|
| 887 | 22036096 | Ramasamy A      | J Allergy Clin Im | IgE grass sensit    | Other   | 2E-09  | 1.33 | [1.21-1.45]     | rs7775228-C  | chr6  |
| 888 | 20694011 | Ferreira RC     | Nat Genet         | Immunoglobulin      | Other   | 2E-06  | 1.36 | [1.19-1.55]     | rs11038871-C | chr11 |
| 889 | 20694011 | Ferreira RC     | Nat Genet         | Immunoglobulin      | Other   | 2E-33  | 2.53 | [2.17-2.95]     | rs2187668-A  | chr6  |
| 890 | 20694011 | Ferreira RC     | Nat Genet         | Immunoglobulin      | Other   | 9E-06  | 1.29 | [1.15-1.46]     | rs7029145-A  | chr9  |
| 891 | 22291609 | Naitza S        | PLoS Genet        | Inflammatory bid    | Other   | 9E-14  | NR   | NR              | rs12034598-A | chr1  |
| 892 | 22291609 | Naitza S        | PLoS Genet        | Inflammatory bid    | Other   | 2E-09  | NR   | NR              | rs4910742-G  | chr11 |
| 893 | 17068223 | Duerr RH        | Science           | Inflammatory bo     | Other   | 4E-11  | 3.84 | [2.33-6.66]     | rs11209026-G | chr1  |
| 894 | 21699788 | Okada Y         | Gastroenterolog   | Inflammatory bo     | Other   | 4E-16  | 1.75 | [1.53-1.99]     | rs2006996-C  | chr9  |
| 895 | 21699788 | Okada Y         | Gastroenterolog   | Inflammatory bo     | Other   | 4E-13  | 1.67 | [1.47-1.92]     | rs2006996-T  | chr9  |
| 896 | 19915574 | Imielinski M    | Nat Genet         | Inflammatory bo     | Other   | 2E-09  | 1.14 | [1.00-1.30]     | rs8049439-G  | chr16 |
| 897 | 21130836 | Luciano M       | Biol Psychol      | Information proc    | Other   | 2E-06  | 0.12 | [0.06-0.18] un  | rs10490919-T | chr10 |
| 898 | 21130836 | Luciano M       | Biol Psychol      | Information proc    | Other   | 8E-06  | 0.24 | [0.14-0.34] un  | rs11077773-T | chr17 |
| 899 | 21130836 | Luciano M       | Biol Psychol      | Information proc    | Other   | 3E-06  | 0.27 | [0.15-0.39] un  | rs17124581-T | chr14 |
| 900 | 21130836 | Luciano M       | Biol Psychol      | Information proc    | Other   | 9E-06  | 0.2  | [0.10-0.30] un  | rs1884136-T  | chr20 |
| 901 | 21130836 | Luciano M       | Biol Psychol      | Information proc    | Other   | 6E-06  | 0.27 | [0.15-0.39] un  | rs2839627-T  | chr21 |
| 902 | 21130836 | Luciano M       | Biol Psychol      | Information proc    | Other   | 9E-06  | 0.37 | [0.21-0.53] un  | rs7283316-A  | chr21 |
| 903 | 21901158 | Irvin MR        | PLoS One          | Insulin resistanc   | Insulin | 6E-07  | 40   | [27 - 51] % de  | rs12655917-C | chr5  |
| 904 | 21901158 | Irvin MR        | PLoS One          | Insulin resistanc   | Insulin | 6E-06  | 15   | [8.00 - 22.00]  | rs16962638-C | chr13 |
| 905 | 21901158 | Irvin MR        | PLoS One          | Insulin resistanc   | Insulin | 1E-06  | 34   | [22.00 - 44.00] | rs17431357-C | chr12 |
| 906 | 21901158 | Irvin MR        | PLoS One          | Insulin resistanc   | Insulin | 4E-06  | 45   | [24.00 - 69.00] | rs17589516-C | chr6  |
| 907 | 21901158 | Irvin MR        | PLoS One          | Insulin resistanc   | Insulin | 2E-06  | 15   | [9.00 - 23.00]  | rs2407103-C  | chr8  |
| 908 | 21901158 | Irvin MR        | PLoS One          | Insulin resistanc   | Insulin | 8E-06  | 9    | [5.00 - 12.00]  | rs2407314-C  | chr8  |
| 909 | 21901158 | Irvin MR        | PLoS One          | Insulin resistanc   | Insulin | 1E-06  | 17   | [10.00 - 23.00] | rs4819143-C  | chr21 |
| 910 | 21901158 | Irvin MR        | PLoS One          | Insulin resistanc   | Insulin | 6E-06  | 9    | [5.00 - 13.00]  | rs591044-A   | chr22 |
| 911 | 21901158 | Irvin MR        | PLoS One          | Insulin resistanc   | Insulin | 7E-06  | 13   | [7.00 - 20.00]  | rs6576507-A  | chr15 |
| 912 | 21901158 | Irvin MR        | PLoS One          | Insulin resistanc   | Insulin | 4E-07  | 14   | [8.00-20.00] %  | rs6576507-A  | chr15 |
| 913 | 21901158 | Irvin MR        | PLoS One          | Insulin resistanc   | Insulin | 3E-06  | 12   | [7.00 - 18.00]  | rs7043482-G  | chr9  |
| 914 | 21901158 | Irvin MR        | PLoS One          | Insulin resistanc   | Insulin | 4E-06  | 12   | [7.00 - 16.00]  | rs9792548-C  | chr9  |
| 915 | 21216879 | Kaplan RC       | Hum Mol Genet     | Insulin-like grow   | Other   | 5E-10  | NR   | NR              | rs4234798-T  | chr4  |
| 916 | 21216879 | Kaplan RC       | Hum Mol Genet     | Insulin-like grow   | Other   | 4E-21  | NR   | NR              | rs700752-G   | chr7  |
| 917 | 21216879 | Kaplan RC       | Hum Mol Genet     | Insulin-like grow   | Other   | 5E-09  | NR   | NR              | rs700752-G   | chr7  |
| 918 | 20150558 | He M            | Arterioscler Thro | Interleukin-18 le   | Other   | 1E-08  | NR   | NR              | rs1834481-G  | chr11 |
| 919 | 20150558 | He M            | Arterioscler Thro | Interleukin-18 le   | Other   | 4E-09  | NR   | NR              | rs2115763-T  | chr11 |
| 920 | 21787189 | Nyberg F        | Pharmacogenom     | Interstitial lung d | Other   | 4E-06  | 2.96 | [1.80-5.00]     | rs170020-C   | chr5  |
| 921 | 22286173 | Low SK          | Hum Mol Genet     | Intracranial anel   | Other   | 2E-07  | 1.21 | [1.133-1.30]    | rs10757272-T | chr9  |
| 922 | 20364137 | Yasuno K        | Nat Genet         | Intracranial anel   | Other   | 1E-09  | 1.29 | [1.19-1.40]     | rs12413409-G | chr10 |
| 923 | 20364137 | Yasuno K        | Nat Genet         | Intracranial anel   | Other   | 1E-12  | 1.28 | [1.20-1.38]     | rs9298506-A  | chr8  |
| 924 | 18997786 | Bilguvar K      | Nat Genet         | Intracranial anel   | Other   | 2E-09  | 1.35 | [1.22-1.49]     | rs9298506-A  | chr8  |
| 925 | 20364137 | Yasuno K        | Nat Genet         | Intracranial anel   | Other   | 3E-09  | 1.2  | [1.13-1.28]     | rs9315204-T  | chr13 |
| 926 | 21835309 | Larsson M       | Am J Hum Gene     | Iris characteristi  | Other   | 1E-06  | 0.12 | [0.06-0.18] un  | rs205611-A   | chr2  |
| 927 | 18991354 | Gretarsdottir S | Ann Neurol        | Ischemic stroke     | Other   | 2E-10  | 1.26 | [1.17-1.35]     | rs2200733-T  | chr4  |
| 928 | 21326860 | Tsai FJ         | PLoS One          | Kawasaki diseas     | Other   | 7E-06  | 1.32 | [1.116-1.551]   | rs10129255-A | chr14 |
| 929 | 21326860 | Tsai FJ         | PLoS One          | Kawasaki diseas     | Other   | 7E-06  | 1.41 | [1.191-1.667]   | rs1568657-G  | chr15 |
| 930 | 19132087 | Burgner D       | PLoS Genet        | Kawasaki diseas     | Other   | 1E-06  | 1.43 | [1.32-1.53]     | rs17531088-T | chr3  |
| 931 | 19132087 | Burgner D       | PLoS Genet        | Kawasaki diseas     | Other   | 2E-06  | 1.56 | [1.33-1.92]     | rs7199343-T  | chr16 |
| 932 | 21221998 | Kim JJ          | Hum Genet         | Kawasaki diseas     | Other   | 2E-06  | 2.7  | [1.77-4.12]     | rs7604693-G  | chr2  |
| 933 | 20711176 | Nakashima M     | Nat Genet         | Keloid              | Other   | 6E-23  | 1.77 | [1.58-1.99]     | rs873549-C   | chr1  |
| 934 | 20864672 | Waterworth DM   | Arterioscler Thro | LDL cholesterol     | Other   | 1E-11  | 0.05 | [0.04-0.06] un  | rs10401969-T | chr19 |
| 935 | 20686565 | Teslovich TM    | Nature            | LDL cholesterol     | Other   | 7E-22  | 3.11 | [2.37-3.85] mg  | rs10401969-C | chr19 |
| 936 | 19060906 | Kathiresan S    | Nat Genet         | LDL cholesterol     | Other   | 2E-08  | 0.05 | [-0.03-0.13] s. | rs10401969-C | chr19 |
| 937 | 19060911 | Aulchenko YS    | Nat Genet         | LDL cholesterol     | Other   | 8E-06  | 0.06 | [NR] s.d. decre | rs10889353-C | chr1  |
| 938 | 20864672 | Waterworth DM   | Arterioscler Thro | LDL cholesterol     | Other   | 1E-10  | 0.03 | [0.02-0.04] un  | rs11206510-T | chr1  |
| 939 | 19060906 | Kathiresan S    | Nat Genet         | LDL cholesterol     | Other   | 4E-08  | 0.09 | [0.05-0.13] s.d | rs11206510-C | chr1  |
| 940 | 18193043 | Willer CJ       | Nat Genet         | LDL cholesterol     | Other   | 4E-11  | 3.04 | [NR] mg/dl hig  | rs11206510-T | chr1  |
| 941 | 18193044 | Kathiresan S    | Nat Genet         | LDL cholesterol     | Other   | 1E-20  | 0.1  | [0.08-0.12] %   | rs12654264-T | chr5  |
| 942 | 19060906 | Kathiresan S    | Nat Genet         | LDL cholesterol     | Other   | 1E-11  | 0.07 | [0.03-0.11] s.d | rs1501908-G  | chr5  |
| 943 | 20686565 | Teslovich TM    | Nature            | LDL cholesterol     | Other   | 2E-17  | 1.95 | [1.48-2.42] mg  | rs1564348-C  | chr6  |
| 944 | 18193044 | Kathiresan S    | Nat Genet         | LDL cholesterol     | Other   | 3E-08  | 0.1  | [0.06-0.14] %   | rs16996148-T | chr19 |
| 945 | 18193043 | Willer CJ       | Nat Genet         | LDL cholesterol     | Other   | 3E-09  | 3.32 | [NR] mg/dl hig  | rs16996148-G | chr19 |
| 946 | 19060911 | Aulchenko YS    | Nat Genet         | LDL cholesterol     | Other   | 4E-13  | 0.11 | [NR] s.d. incre | rs174570-G   | chr11 |
| 947 | 20686565 | Teslovich TM    | Nature            | LDL cholesterol     | Other   | 2E-28  | 2.01 | [1.58-2.44] mg  | rs2479409-G  | chr1  |
| 948 | 20686565 | Teslovich TM    | Nature            | LDL cholesterol     | Other   | 6E-11  | 1.09 | [0.7-1.48] mg/  | rs2642442-T  | chr1  |
| 949 | 19060906 | Kathiresan S    | Nat Genet         | LDL cholesterol     | Other   | 2E-08  | 0.07 | [0.03-0.11] s.d | rs2650000-A  | chr12 |
| 950 | 19060911 | Aulchenko YS    | Nat Genet         | LDL cholesterol     | Other   | 2E-11  | 0.08 | [NR] s.d. incre | rs3846662-G  | chr5  |
| 951 | 19060906 | Kathiresan S    | Nat Genet         | LDL cholesterol     | Other   | 8E-12  | 0.07 | [0.03-0.11] s.d | rs3846663-T  | chr5  |
| 952 | 20864672 | Waterworth DM   | Arterioscler Thro | LDL cholesterol     | Other   | 2E-40  | 0.06 | [0.05-0.07] un  | rs4420638-G  | chr19 |
| 953 | 20686565 | Teslovich TM    | Nature            | LDL cholesterol     | Other   | 9E-147 | 7.14 | [6.57-7.71] mg  | rs4420638-G  | chr19 |
| 954 | 19060906 | Kathiresan S    | Nat Genet         | LDL cholesterol     | Other   | 4E-27  | 0.29 | [0.17-0.41] s.d | rs4420638-G  | chr19 |
| 955 | 18262040 | Sandhu MS       | Lancet            | LDL cholesterol     | Other   | 1E-20  | 0.06 | [0.04-0.08] m   | rs4420638-G  | chr19 |
| 956 | 18193044 | Kathiresan S    | Nat Genet         | LDL cholesterol     | Other   | 1E-60  | 0.19 | [0.15-0.23] %   | rs4420638-G  | chr19 |
| 957 | 18193043 | Willer CJ       | Nat Genet         | LDL cholesterol     | Other   | 3E-43  | 6.61 | [NR] mg/dl hig  | rs4420638-G  | chr19 |
| 958 | 19060910 | Sabatti C       | Nat Genet         | LDL cholesterol     | Other   | 2E-07  | 0.1  | [0.06-0.14] m   | rs4844614-A  | chr1  |
| 959 | 18262040 | Sandhu MS       | Lancet            | LDL cholesterol     | Other   | 1E-09  | 0.04 | [0.02-0.06] m   | rs562338-T   | chr2  |
| 960 | 18193043 | Willer CJ       | Nat Genet         | LDL cholesterol     | Other   | 6E-22  | 4.89 | [NR] mg/dl hig  | rs562338-G   | chr2  |
| 961 | 18262040 | Sandhu MS       | Lancet            | LDL cholesterol     | Other   | 1E-33  | 0.16 | [0.14-0.18] m   | rs599839-G   | chr1  |
| 962 | 18193043 | Willer CJ       | Nat Genet         | LDL cholesterol     | Other   | 6E-33  | 5.48 | [NR] mg/dl hig  | rs599839-A   | chr1  |

|      |          |              |                   |                 |       |        |      |                  |              |       |
|------|----------|--------------|-------------------|-----------------|-------|--------|------|------------------|--------------|-------|
| 963  | 18179892 | Wallace C    | Am J Hum Genet    | LDL cholesterol | Other | 1E-07  | 0.95 | [0.93-0.97]      | rs599839-G   | chr1  |
| 964  | 19060906 | Kathiresan S | Nat Genet         | LDL cholesterol | Other | 4E-09  | 0.06 | [0.03-0.10] s.d. | rs6102059-T  | chr20 |
| 965  | 20686565 | Teslovich TM | Nature            | LDL cholesterol | Other | 1E-170 | 5.65 | [5.24-6.06] mg   | rs629301-G   | chr1  |
| 966  | 18179892 | Wallace C    | Am J Hum Genet    | LDL cholesterol | Other | 3E-11  | NR   | NR               | rs6589566-G  | chr11 |
| 967  | 19060911 | Aulchenko YS | Nat Genet         | LDL cholesterol | Other | 4E-17  | 0.1  | [NR] s.d. decre  | rs693-G      | chr2  |
| 968  | 19060910 | Sabatti C    | Nat Genet         | LDL cholesterol | Other | 3E-11  | 0.12 | [0.09-0.16] m    | rs693-A      | chr2  |
| 969  | 18193044 | Kathiresan S | Nat Genet         | LDL cholesterol | Other | 1E-21  | 0.12 | [0.10-0.14] %    | rs693-A      | chr2  |
| 970  | 20686565 | Teslovich TM | Nature            | LDL cholesterol | Other | 4E-09  | 0.87 | [0.52-1.22] mg   | rs7206971-T  | chr17 |
| 971  | 18802019 | Burkhardt R  | Arterioscler Thro | LDL cholesterol | Other | 1E-08  | 18   | [NR] % s.d. in   | rs7703051-A  | chr5  |
| 972  | 18179892 | Wallace C    | Am J Hum Genet    | LDL cholesterol | Other | 5E-07  | NR   | NR               | rs780094-T   | chr2  |
| 973  | 20686565 | Teslovich TM | Nature            | LDL cholesterol | Other | 1E-26  | 2.85 | [2.32-3.38] mg   | rs964184-G   | chr11 |
| 974  | 22019778 | Zhang F      | Nat Genet         | Leprosy         | Other | 4E-14  | 1.3  | [1.21-1.39]      | rs2275606-A  | chr6  |
| 975  | 22019778 | Zhang F      | Nat Genet         | Leprosy         | Other | 3E-11  | 1.45 | [1.30-1.61]      | rs3762318-A  | chr1  |
| 976  | 20018961 | Zhang FR     | N Engl J Med      | Leprosy         | Other | 4E-54  | 1.68 | [1.57-1.80]      | rs3764147-G  | chr13 |
| 977  | 20018961 | Zhang FR     | N Engl J Med      | Leprosy         | Other | 1E-12  | 1.3  | [1.20-1.39]      | rs40457-A    | chr8  |
| 978  | 20018961 | Zhang FR     | N Engl J Med      | Leprosy         | Other | 3E-21  | 1.37 | [1.28-1.46]      | rs6478108-A  | chr9  |
| 979  | 20442857 | Suchindran S | PLoS Genet        | Lipoprotein-ass | Other | 1E-08  | 4.6  | [NR] nmol/ml/r   | rs10846744-C | chr12 |
| 980  | 20442857 | Suchindran S | PLoS Genet        | Lipoprotein-ass | Other | 4E-08  | 6.4  | [NR] nmol/ml/r   | rs12286037-T | chr11 |
| 981  | 22003152 | Grallert H   | Eur Heart J       | Lipoprotein-ass | Other | 2E-23  | 0.04 | [0.035-0.051]    | rs1805017-T  | chr6  |
| 982  | 20442857 | Suchindran S | PLoS Genet        | Lipoprotein-ass | Other | 6E-14  | 11.1 | [NR] ng/mL in    | rs1805017-T  | chr6  |
| 983  | 22003152 | Grallert H   | Eur Heart J       | Lipoprotein-ass | Other | 5E-30  | 0.05 | [0.044-0.064]    | rs4420638-A  | chr19 |
| 984  | 20442857 | Suchindran S | PLoS Genet        | Lipoprotein-ass | Other | 6E-24  | 8    | [NR] nmol/ml/r   | rs4420638-G  | chr19 |
| 985  | 20442857 | Suchindran S | PLoS Genet        | Lipoprotein-ass | Other | 3E-15  | 5.5  | [NR] nmol/ml/r   | rs599839-G   | chr1  |
| 986  | 22003152 | Grallert H   | Eur Heart J       | Lipoprotein-ass | Other | 8E-11  | 0.03 | [0.022-0.042]    | rs964184-C   | chr11 |
| 987  | 18940312 | Yuan X       | Am J Hum Genet    | Liver enzyme le | Other | 7E-10  | 0.03 | [0.017-0.033]    | rs10761779-G | chr10 |
| 988  | 18940312 | Yuan X       | Am J Hum Genet    | Liver enzyme le | Other | 2E-08  | 0.04 | [0.025-0.053]    | rs11597390-A | chr10 |
| 989  | 18940312 | Yuan X       | Am J Hum Genet    | Liver enzyme le | Other | 2E-10  | 0.01 | [0.003-0.007]    | rs1169313-C  | chr12 |
| 990  | 18940312 | Yuan X       | Am J Hum Genet    | Liver enzyme le | Other | 5E-10  | 0.03 | [0.017-0.033]    | rs12355784-A | chr10 |
| 991  | 18940312 | Yuan X       | Am J Hum Genet    | Liver enzyme le | Other | 7E-15  | 0.03 | [0.023-0.039]    | rs1780324-T  | chr1  |
| 992  | 18940312 | Yuan X       | Am J Hum Genet    | Liver enzyme le | Other | 8E-16  | 0.06 | [0.046-0.074]    | rs2281135-T  | chr22 |
| 993  | 18940312 | Yuan X       | Am J Hum Genet    | Liver enzyme le | Other | 4E-11  | 0.01 | [0.005-0.009]    | rs4820599-G  | chr22 |
| 994  | 18940312 | Yuan X       | Am J Hum Genet    | Liver enzyme le | Other | 8E-21  | 0.06 | [0.048-0.072]    | rs4962153-A  | chr9  |
| 995  | 18940312 | Yuan X       | Am J Hum Genet    | Liver enzyme le | Other | 2E-30  | 0.05 | [0.039-0.055]    | rs657152-T   | chr9  |
| 996  | 18940312 | Yuan X       | Am J Hum Genet    | Liver enzyme le | Other | 1E-11  | 0.03 | [0.024-0.044]    | rs9467160-A  | chr6  |
| 997  | 18940312 | Yuan X       | Am J Hum Genet    | Liver enzyme le | Other | 4E-06  | 0.03 | [0.018-0.042]    | rs9803659-C  | chr1  |
| 998  | 22001757 | Chambers JC  | Nat Genet         | Liver enzyme le | Other | 6E-26  | 3.1  | [2.50-3.70] %    | rs1883415-C  | chr6  |
| 999  | 22001757 | Chambers JC  | Nat Genet         | Liver enzyme le | Other | 8E-12  | 2.1  | [1.50-2.80] %    | rs314253-C   | chr17 |
| 1000 | 22001757 | Chambers JC  | Nat Genet         | Liver enzyme le | Other | 7E-10  | 1.5  | [0.90-2.0] % ir  | rs7267979-G  | chr20 |
| 1001 | 22001757 | Chambers JC  | Nat Genet         | Liver enzyme le | Other | 6E-11  | 4.9  | [4.00-5.70] %    | rs10513686-A | chr3  |
| 1002 | 22001757 | Chambers JC  | Nat Genet         | Liver enzyme le | Other | 3E-10  | 5.5  | [3.30-7.70] %    | rs4074793-G  | chr5  |
| 1003 | 22001757 | Chambers JC  | Nat Genet         | Liver enzyme le | Other | 3E-09  | 3.2  | [2.50-3.90] %    | rs4581712-A  | chr16 |
| 1004 | 22001757 | Chambers JC  | Nat Genet         | Liver enzyme le | Other | 6E-10  | 3.5  | [2.20-4.80] %    | rs754466-T   | chr10 |
| 1005 | 22001757 | Chambers JC  | Nat Genet         | Liver enzyme le | Other | 1E-09  | 2.4  | [1.80-3.00] %    | rs8038465-T  | chr15 |
| 1006 | 22001757 | Chambers JC  | Nat Genet         | Liver enzyme le | Other | 3E-09  | 3    | [2.10-4.00] %    | rs9296736-T  | chr6  |
| 1007 | 22001757 | Chambers JC  | Nat Genet         | Liver enzyme le | Other | 1E-09  | 2.4  | [1.80-3.00] %    | rs9913711-C  | chr17 |
| 1008 | 21612516 | Malovini A   | Rejuvenation Re   | Longevity       | Other | 2E-06  | 1.82 | [1.43-2.33]      | rs10491334-C | chr5  |
| 1009 | 20304771 | Newman AB    | J Gerontol A Bic  | Longevity       | Other | 7E-07  | 1.22 | [NR]             | rs9664222-C  | chr10 |
| 1010 | 21900290 | Qi Q         | Eur Heart J       | Lp (a) levels   | Other | 5E-08  | 0.5  | [0.32-0.68] de   | rs12214416-A | chr6  |
| 1011 | 21900290 | Qi Q         | Eur Heart J       | Lp (a) levels   | Other | 4E-09  | 0.32 | [0.22-0.42] mg   | rs3120139-A  | chr6  |
| 1012 | 21900290 | Qi Q         | Eur Heart J       | Lp (a) levels   | Other | 3E-17  | 0.3  | [0.22-0.38] mg   | rs783147-A   | chr6  |
| 1013 | 20871597 | Miki D       | Nat Genet         | Lung adenocarc  | Other | 3E-11  | 1.27 | [1.19-1.37]      | rs2736100-C  | chr5  |
| 1014 | 20700438 | Hsiung CA    | PLoS Genet        | Lung adenocarc  | Other | 2E-22  | 1.46 | [1.35-1.57]      | rs2736100-G  | chr5  |
| 1015 | 19836008 | Landi MT     | Am J Hum Genet    | Lung adenocarc  | Other | 2E-10  | 1.12 | [1.08-1.16]      | rs2736100-G  | chr5  |
| 1016 | 20304703 | Li Y         | Lancet Oncol      | Lung cancer     | Other | 6E-06  | 1.46 | [1.26-1.70]      | rs2352028-A  | chr13 |
| 1017 | 21725308 | Hu Z         | Nat Genet         | Lung cancer     | Other | 1E-27  | 1.27 | [1.22-1.33]      | rs2736100-C  | chr5  |
| 1018 | 21725308 | Hu Z         | Nat Genet         | Lung cancer     | Other | 6E-13  | 1.29 | [1.20-1.38]      | rs36600-A    | chr22 |
| 1019 | 18978787 | Wang Y       | Nat Genet         | Lung cancer     | Other | 8E-09  | 1.15 | [1.09-1.19]      | rs401681-G   | chr5  |
| 1020 | 21725308 | Hu Z         | Nat Genet         | Lung cancer     | Other | 7E-26  | 1.26 | [1.21-1.32]      | rs4488809-C  | chr3  |
| 1021 | 18385676 | Amos CI      | Nat Genet         | Lung cancer     | Other | 8E-06  | 1.16 | [1.05-1.28]      | rs7626795-G  | chr3  |
| 1022 | 21042317 | Wray NR      | Mol Psychiatry    | Major depressiv | Other | 1E-06  | 1.22 | [NR]             | rs12446956-C | chr16 |
| 1023 | 20125088 | Shi J        | Mol Psychiatry    | Major depressiv | Other | 4E-07  | 1.35 |                  | rs2828520-G  | chr21 |
| 1024 | 20125088 | Shi J        | Mol Psychiatry    | Major depressiv | Other | 2E-06  | 1.34 |                  | rs882632-T   | chr2  |
| 1025 | 20038947 | Shyn SI      | Mol Psychiatry    | Major depressiv | Other | 1E-06  | 1.19 | [NR]             | rs9870680-T  | chr3  |
| 1026 | 19465909 | Jallow M     | Nat Genet         | Malaria         | Other | 7E-07  | 1.21 | [1.12-1.31]      | rs6503319-T  | chr17 |
| 1027 | 18849991 | Richards JB  | Nat Genet         | Male-pattern ba | Other | 1E-14  | 1.6  | [1.42-1.80] (m   | rs1160312-A  | chr20 |
| 1028 | 18849994 | Hillmer AM   | Nat Genet         | Male-pattern ba | Other | 3E-15  | 1.82 | [1.45-2.30]      | rs2180439-C  | chr20 |
| 1029 | 19862010 | Ganesh SK    | Nat Genet         | Mean corpuscul  | Other | 2E-14  | 0    | [0.004-0.006]    | rs10758658-A | chr9  |
| 1030 | 19862010 | Ganesh SK    | Nat Genet         | Mean corpuscul  | Other | 3E-10  | 0    | [0.003-0.006]    | rs1122794-A  | chr16 |
| 1031 | 19862010 | Ganesh SK    | Nat Genet         | Mean corpuscul  | Other | 9E-34  | 0.01 | [0.0005-0.007]   | rs2413450-T  | chr22 |
| 1032 | 19862010 | Ganesh SK    | Nat Genet         | Mean corpuscul  | Other | 1E-17  | 0    | [0.003-0.005]    | rs628751-C   | chr6  |
| 1033 | 19862010 | Ganesh SK    | Nat Genet         | Mean corpuscul  | Other | 3E-20  | 0    | [0.003-0.005]    | rs10758658-A | chr9  |
| 1034 | 19862010 | Ganesh SK    | Nat Genet         | Mean corpuscul  | Other | 1E-10  | 0    | [0.002-0.003]    | rs11229550-G | chr10 |
| 1035 | 19862010 | Ganesh SK    | Nat Genet         | Mean corpuscul  | Other | 3E-41  | 0.01 | [0.004-0.006]    | rs2413450-T  | chr22 |
| 1036 | 19862010 | Ganesh SK    | Nat Genet         | Mean corpuscul  | Other | 7E-86  | 0.01 | [0.007-0.009]    | rs4895441-G  | chr6  |
| 1037 | 19862010 | Ganesh SK    | Nat Genet         | Mean corpuscul  | Other | 4E-10  | 0    | [0.002-0.003]    | rs9374080-C  | chr6  |
| 1038 | 22139419 | Gieger C     | Nature            | Mean platelet v | Other | 2E-14  | 0.01 | [0.0060-0.010]   | rs10876550-G | chr12 |

|      |          |             |               |                  |       |        |      |                 |              |       |
|------|----------|-------------|---------------|------------------|-------|--------|------|-----------------|--------------|-------|
| 1039 | 22139419 | Gieger C    | Nature        | Mean platelet vd | Other | 1E-11  | 0.01 | [0.0071-0.014]  | rs11734132-G | chr4  |
| 1040 | 19820697 | Soranzo N   | Nat Genet     | Mean platelet vd | Other | 6E-31  | 0.02 | [0.013-0.017]   | rs12485738-A | chr3  |
| 1041 | 19110211 | Meisinger C | Am J Hum Gene | Mean platelet vd | Other | 4E-27  | 0.02 | [0.01-0.02] pe  | rs12485738-A | chr3  |
| 1042 | 22139419 | Gieger C    | Nature        | Mean platelet vd | Other | 2E-15  | 0.01 | [0.008-0.012]   | rs17655730-T | chr11 |
| 1043 | 19820697 | Soranzo N   | Nat Genet     | Mean platelet vd | Other | 1E-22  | 0.02 | [0.012-0.020]   | rs2138852-T  | chr17 |
| 1044 | 19110211 | Meisinger C | Am J Hum Gene | Mean platelet vd | Other | 7E-28  | 0.02 | [0.01-0.02] pe  | rs2138852-C  | chr17 |
| 1045 | 22139419 | Gieger C    | Nature        | Mean platelet vd | Other | 7E-14  | 0.01 | [0.006-0.01] In | rs2950390-C  | chr12 |
| 1046 | 22139419 | Gieger C    | Nature        | Mean platelet vd | Other | 8E-12  | 0.01 | [0.004-0.008]   | rs7317038-C  | chr13 |
| 1047 | 19820697 | Soranzo N   | Nat Genet     | Mean platelet vd | Other | 3E-44  | 0.03 | [0.027-0.035]   | rs7961894-T  | chr12 |
| 1048 | 19110211 | Meisinger C | Am J Hum Gene | Mean platelet vd | Other | 7E-48  | 0.03 | [0.03-0.04] pe  | rs7961894-A  | chr12 |
| 1049 | 21983787 | Barrett JH  | Nat Genet     | Melanoma         | Other | 9E-10  | 1.14 | [1.09-1.19]     | rs13016963-A | chr2  |
| 1050 | 21983787 | Barrett JH  | Nat Genet     | Melanoma         | Other | 2E-13  | 1.3  | [1.21-1.39]     | rs1393350-A  | chr11 |
| 1051 | 19578364 | Bishop DT   | Nat Genet     | Melanoma         | Other | 2E-14  | 1.29 | [1.21-1.38]     | rs1393350-A  | chr11 |
| 1052 | 21983787 | Barrett JH  | Nat Genet     | Melanoma         | Other | 3E-27  | 1.7  | [1.54-1.87]     | rs258322-A   | chr16 |
| 1053 | 19578364 | Bishop DT   | Nat Genet     | Melanoma         | Other | 3E-27  | 1.67 | [1.52-1.83]     | rs258322-A   | chr16 |
| 1054 | 21983785 | Macgregor S | Nat Genet     | Melanoma         | Other | 9E-08  | 1.15 | [NR]            | rs3219090-C  | chr1  |
| 1055 | 21983787 | Barrett JH  | Nat Genet     | Melanoma         | Other | 3E-08  | 1.2  | [1.12-1.28]     | rs401681-A   | chr5  |
| 1056 | 19578364 | Bishop DT   | Nat Genet     | Melanoma         | Other | 6E-22  | 1.36 | [1.28-1.45]     | rs4785763-A  | chr16 |
| 1057 | 18488026 | Brown KM    | Nat Genet     | Melanoma         | Other | 1E-15  | 1.75 | [1.53-2.01]     | rs910873-T   | chr20 |
| 1058 | 21102462 | Elks CE     | Nat Genet     | Menarche (age    | Other | 6E-14  | 3.9  | [2.92-4.88] we  | rs1079866-G  | chr7  |
| 1059 | 21102462 | Elks CE     | Nat Genet     | Menarche (age    | Other | 8E-09  | 3.1  | [2.12-4.08] we  | rs10899489-A | chr11 |
| 1060 | 21102462 | Elks CE     | Nat Genet     | Menarche (age    | Other | 6E-08  | 3.7  | [2.33-5.07] we  | rs16938437-T | chr11 |
| 1061 | 21102462 | Elks CE     | Nat Genet     | Menarche (age    | Other | 1E-10  | 3.2  | [2.22-4.18] we  | rs17268785-G | chr2  |
| 1062 | 21102462 | Elks CE     | Nat Genet     | Menarche (age    | Other | 1E-07  | 2.3  | [1.52-3.08] we  | rs2687729-G  | chr3  |
| 1063 | 21102462 | Elks CE     | Nat Genet     | Menarche (age    | Other | 2E-08  | 2.8  | [1.82-3.78] we  | rs2947411-A  | chr2  |
| 1064 | 21102462 | Elks CE     | Nat Genet     | Menarche (age    | Other | 8E-07  | 2    | [1.22-2.78] we  | rs3743266-C  | chr15 |
| 1065 | 21102462 | Elks CE     | Nat Genet     | Menarche (age    | Other | 1E-13  | 4.2  | [3.02-5.38] we  | rs466639-T   | chr1  |
| 1066 | 21102462 | Elks CE     | Nat Genet     | Menarche (age    | Other | 1E-08  | 2.3  | [1.52-3.08] we  | rs4929923-T  | chr11 |
| 1067 | 21102462 | Elks CE     | Nat Genet     | Menarche (age    | Other | 2E-12  | 2.7  | [1.92-3.48] we  | rs6589964-A  | chr11 |
| 1068 | 21102462 | Elks CE     | Nat Genet     | Menarche (age    | Other | 5E-08  | 2.4  | [1.62-3.18] we  | rs757647-A   | chr5  |
| 1069 | 21102462 | Elks CE     | Nat Genet     | Menarche (age    | Other | 3E-08  | 2.4  | [1.62-3.18] we  | rs7617480-A  | chr3  |
| 1070 | 21102462 | Elks CE     | Nat Genet     | Menarche (age    | Other | 3E-08  | 2.1  | [1.32-2.88] we  | rs852069-A   | chr20 |
| 1071 | 21102462 | Elks CE     | Nat Genet     | Menarche (age    | Other | 3E-08  | 2.1  | [1.32-2.88] we  | rs9939609-A  | chr16 |
| 1072 | 19448621 | He C        | Nat Genet     | Menarche and r   | Other | 1E-21  | 1.07 | [0.85-1.29] ye  | rs16991615-A | chr20 |
| 1073 | 19448621 | He C        | Nat Genet     | Menarche and r   | Other | 5E-08  | 0.29 | [0.19-0.39] ye  | rs2153157-T  | chr6  |
| 1074 | 22267201 | Stolk L     | Nat Genet     | Menopause (ag    | Other | 2E-14  | 0.2  | [0.15-0.25] ye  | rs10183486-T | chr2  |
| 1075 | 22267201 | Stolk L     | Nat Genet     | Menopause (ag    | Other | 2E-16  | 0.21 | [0.16-0.26] ye  | rs1046089-A  | chr6  |
| 1076 | 22267201 | Stolk L     | Nat Genet     | Menopause (ag    | Other | 9E-10  | 0.16 | [0.11-0.21] ye  | rs12461110-A | chr19 |
| 1077 | 22267201 | Stolk L     | Nat Genet     | Menopause (ag    | Other | 8E-10  | 0.16 | [0.11-0.22] ye  | rs1635501-C  | chr1  |
| 1078 | 22267201 | Stolk L     | Nat Genet     | Menopause (ag    | Other | 1E-73  | 0.95 | [0.85-1.05] ye  | rs16991615-A | chr20 |
| 1079 | 22267201 | Stolk L     | Nat Genet     | Menopause (ag    | Other | 8E-12  | 0.17 | [0.12-0.21] ye  | rs2153157-A  | chr6  |
| 1080 | 22267201 | Stolk L     | Nat Genet     | Menopause (ag    | Other | 4E-13  | 0.18 | [0.14-0.23] ye  | rs2307449-G  | chr15 |
| 1081 | 19448619 | Stolk L     | Nat Genet     | Menopause (ag    | Other | 1E-10  | 0.5  | [0.34-0.65] ye  | rs236114-A   | chr20 |
| 1082 | 21386085 | Kraja AT    | Diabetes      | Metabolic syndr  | Other | 1E-08  | 0.32 | [0.20-0.44] un  | rs12286037-C | chr11 |
| 1083 | 21386085 | Kraja AT    | Diabetes      | Metabolic syndr  | Other | 2E-09  | 0.18 | [0.12-0.24] un  | rs2197089-C  | chr8  |
| 1084 | 21886157 | Suhre K     | Nature        | Metabolic traits | Other | 1E-13  | 0.09 | [NR] unit incre | rs10518693-T | chr15 |
| 1085 | 21886157 | Suhre K     | Nature        | Metabolic traits | Other | 3E-20  | 0.13 | [NR] unit decre | rs10799701-A | chr1  |
| 1086 | 19060910 | Sabatti C   | Nat Genet     | Metabolic traits | Other | 3E-07  | 0.31 | [0.18-0.44] mn  | rs11185790-A | chr10 |
| 1087 | 21886157 | Suhre K     | Nature        | Metabolic traits | Other | 5E-15  | 0.29 | [NR] unit incre | rs12670403-C | chr7  |
| 1088 | 21886157 | Suhre K     | Nature        | Metabolic traits | Other | 5E-252 | 0.37 | [NR] unit decre | rs13391552-A | chr2  |
| 1089 | 21886157 | Suhre K     | Nature        | Metabolic traits | Other | 2E-40  | 0.26 | [NR] unit decre | rs1495743-G  | chr8  |
| 1090 | 21886157 | Suhre K     | Nature        | Metabolic traits | Other | 9E-40  | 0.48 | [NR] unit decre | rs1727546-A  | chr7  |
| 1091 | 21886157 | Suhre K     | Nature        | Metabolic traits | Other | 9E-116 | 0.18 | [NR] unit decre | rs174547-C   | chr11 |
| 1092 | 21886157 | Suhre K     | Nature        | Metabolic traits | Other | 2E-22  | 0.11 | [NR] unit incre | rs2023634-G  | chr22 |
| 1093 | 21886157 | Suhre K     | Nature        | Metabolic traits | Other | 4E-305 | 0.61 | [NR] unit incre | rs2066938-G  | chr12 |
| 1094 | 21886157 | Suhre K     | Nature        | Metabolic traits | Other | 7E-13  | 0.12 | [NR] unit decre | rs2087160-G  | chr4  |
| 1095 | 21886157 | Suhre K     | Nature        | Metabolic traits | Other | 2E-71  | 0.16 | [NR] unit decre | rs211718-T   | chr1  |
| 1096 | 21886157 | Suhre K     | Nature        | Metabolic traits | Other | 2E-27  | 0.12 | [NR] unit incre | rs2216405-G  | chr2  |
| 1097 | 21886157 | Suhre K     | Nature        | Metabolic traits | Other | 1E-20  | 0.11 | [NR] unit decre | rs2403254-T  | chr11 |
| 1098 | 21886157 | Suhre K     | Nature        | Metabolic traits | Other | 7E-13  | 0.07 | [NR] unit decre | rs2518049-A  | chr10 |
| 1099 | 19060910 | Sabatti C   | Nat Genet     | Metabolic traits | Other | 3E-11  | 0.4  | [0.25-0.55] mn  | rs2650000-A  | chr12 |
| 1100 | 21886157 | Suhre K     | Nature        | Metabolic traits | Other | 7E-27  | 0.09 | [NR] unit decre | rs2652822-C  | chr15 |
| 1101 | 21886157 | Suhre K     | Nature        | Metabolic traits | Other | 3E-17  | 0.04 | [NR] unit decre | rs2657879-G  | chr12 |
| 1102 | 21886157 | Suhre K     | Nature        | Metabolic traits | Other | 7E-16  | 0.08 | [NR] unit incre | rs272889-A   | chr5  |
| 1103 | 19060910 | Sabatti C   | Nat Genet     | Metabolic traits | Other | 3E-22  | 0.47 | [0.32-0.62] mn  | rs2794520-A  | chr1  |
| 1104 | 21886157 | Suhre K     | Nature        | Metabolic traits | Other | 3E-22  | 0.21 | [NR] unit decre | rs4149081-A  | chr12 |
| 1105 | 21886157 | Suhre K     | Nature        | Metabolic traits | Other | 7E-18  | 0.24 | [NR] unit decre | rs4253252-T  | chr4  |
| 1106 | 21886157 | Suhre K     | Nature        | Metabolic traits | Other | 8E-20  | 0.13 | [NR] unit decre | rs4329-G     | chr17 |
| 1107 | 21886157 | Suhre K     | Nature        | Metabolic traits | Other | 6E-34  | 0.07 | [NR] unit decre | rs4481233-T  | chr4  |
| 1108 | 21886157 | Suhre K     | Nature        | Metabolic traits | Other | 3E-14  | 0.05 | [NR] unit decre | rs477992-A   | chr1  |
| 1109 | 21886157 | Suhre K     | Nature        | Metabolic traits | Other | 7E-13  | 0.3  | [NR] unit incre | rs494562-G   | chr6  |
| 1110 | 21886157 | Suhre K     | Nature        | Metabolic traits | Other | 4E-20  | 0.13 | [NR] unit incre | rs503279-C   | chr19 |
| 1111 | 19060910 | Sabatti C   | Nat Genet     | Metabolic traits | Other | 6E-10  | 0.06 | [0.04-0.07] mn  | rs560887-A   | chr2  |
| 1112 | 21886157 | Suhre K     | Nature        | Metabolic traits | Other | 3E-57  | 0.12 | [NR] unit incre | rs603424-A   | chr10 |
| 1113 | 21886157 | Suhre K     | Nature        | Metabolic traits | Other | 9E-40  | 0.2  | [NR] unit incre | rs612169-G   | chr9  |
| 1114 | 21886157 | Suhre K     | Nature        | Metabolic traits | Other | 1E-18  | 0.11 | [NR] unit incre | rs6499165-A  | chr16 |

|      |          |                |                 |                    |                  |       |      |             |            |              |       |
|------|----------|----------------|-----------------|--------------------|------------------|-------|------|-------------|------------|--------------|-------|
| 1115 | 21886157 | Suhre K        | Nature          | Metabolic traits   | Other            | 2E-59 | 0.12 | [NR]        | unit decre | rs6558295-G  | chr8  |
| 1116 | 21886157 | Suhre K        | Nature          | Metabolic traits   | Other            | 7E-25 | 0.16 | [NR]        | unit decre | rs662138-G   | chr6  |
| 1117 | 19060910 | Sabatti C      | Nat Genet       | Metabolic traits   | Hypertriglycerid | 2E-18 | 0.08 | [0.05-0.11] | mn         | rs673548-A   | chr2  |
| 1118 | 21886157 | Suhre K        | Nature          | Metabolic traits   | Other            | 3E-14 | 0.05 | [NR]        | unit decre | rs7094971-G  | chr10 |
| 1119 | 21886157 | Suhre K        | Nature          | Metabolic traits   | Other            | 1E-12 | 0.04 | [NR]        | unit decre | rs7760535-G  | chr6  |
| 1120 | 21886157 | Suhre K        | Nature          | Metabolic traits   | Other            | 6E-53 | 0.1  | [NR]        | unit incre | rs780094-T   | chr2  |
| 1121 | 21886157 | Suhre K        | Nature          | Metabolic traits   | Other            | 6E-15 | 0.1  | [NR]        | unit decre | rs8396-C     | chr4  |
| 1122 | 21886157 | Suhre K        | Nature          | Metabolic traits   | Other            | 3E-74 | 0.29 | [NR]        | unit incre | rs887829-T   | chr2  |
| 1123 | 21886157 | Suhre K        | Nature          | Metabolic traits   | Other            | 5E-32 | 0.16 | [NR]        | unit decre | rs9332998-C  | chr1  |
| 1124 | 21886157 | Suhre K        | Nature          | Metabolic traits   | Other            | 2E-14 | 0.06 | [NR]        | unit decre | rs9393903-A  | chr6  |
| 1125 | 21493818 | Shaw SY        | Circ Cardiovasc | Monocyte early     | Other            | 4E-06 | 0.16 | [0.08-0.24] | un         | rs6712720-C  | chr2  |
| 1126 | 20400778 | Morrison AC    | Circ Cardiovasc | Mortality among    | Other            | 2E-06 | 1.58 | [0.98-2.56] |            | rs6868223-A  | chr5  |
| 1127 | 20400778 | Morrison AC    | Circ Cardiovasc | Mortality among    | Other            | 7E-06 | 1.64 | [0.94-2.78] |            | rs8017423-T  | chr14 |
| 1128 | 22120009 | Broderick P    | Nat Genet       | Multiple myelom    | Other            | 4E-07 | 1.29 | [1.17-1.42] |            | rs6746082-A  | chr2  |
| 1129 | 22190364 | Patsopoulos NA | Ann Neurol      | Multiple sclerosis | Other            | 2E-07 | 1.16 | [NR]        |            | rs10411936-A | chr19 |
| 1130 | 18997785 | Aulchenko YS   | Nat Genet       | Multiple sclerosis | Other            | 3E-10 | 1.34 | [1.23-1.48] |            | rs10492972-C | chr1  |
| 1131 | 22190364 | Patsopoulos NA | Ann Neurol      | Multiple sclerosis | Other            | 7E-07 | 1.17 | [NR]        |            | rs10866713-A | chr5  |
| 1132 | 17660530 | Hafler DA      | N Engl J Med    | Multiple sclerosis | Other            | 8E-06 | 1.17 | [1.09-1.25] |            | rs10984447-A | chr9  |
| 1133 | 21833088 | Sawcer S       | Nature          | Multiple sclerosis | Other            | 3E-10 | 1.12 | [1.10-1.13] |            | rs11581062-G | chr1  |
| 1134 | 21833088 | Sawcer S       | Nature          | Multiple sclerosis | Other            | 6E-10 | 1.11 | [1.10-1.13] |            | rs12466022-C | chr2  |
| 1135 | 22190364 | Patsopoulos NA | Ann Neurol      | Multiple sclerosis | Other            | 4E-08 | 1.23 | [NR]        |            | rs12722489-C | chr10 |
| 1136 | 17660530 | Hafler DA      | N Engl J Med    | Multiple sclerosis | Other            | 3E-08 | 1.25 | [1.11-1.36] |            | rs12722489-C | chr10 |
| 1137 | 22190364 | Patsopoulos NA | Ann Neurol      | Multiple sclerosis | Other            | 2E-08 | 1.17 | [NR]        |            | rs170934-T   | chr3  |
| 1138 | 21833088 | Sawcer S       | Nature          | Multiple sclerosis | Other            | 1E-08 | 1.11 | [1.09-1.13] |            | rs17174870-G | chr2  |
| 1139 | 19525955 | Bahlo          | Nat Genet       | Multiple sclerosis | Other            | 7E-06 | 1.16 | [NR]        |            | rs2104286-A  | chr10 |
| 1140 | 19525953 | De Jager PL    | Nat Genet       | Multiple sclerosis | Other            | 9E-08 | 1.15 | [1.04-1.27] |            | rs2104286-T  | chr10 |
| 1141 | 21833088 | Sawcer S       | Nature          | Multiple sclerosis | Other            | 2E-10 | 1.22 | [1.19-1.25] |            | rs2119704-C  | chr14 |
| 1142 | 21833088 | Sawcer S       | Nature          | Multiple sclerosis | Other            | 5E-09 | 1.1  | [1.08-1.11] |            | rs2283792-C  | chr22 |
| 1143 | 21833088 | Sawcer S       | Nature          | Multiple sclerosis | Other            | 2E-08 | 1.11 | [1.09-1.12] |            | rs2300603-A  | chr14 |
| 1144 | 20598377 | Nischwitz S    | J Neuroimmunol  | Multiple sclerosis | Other            | 2E-07 | 1.66 | [1.37-2.00] |            | rs2503875-A  | chr10 |
| 1145 | 22190364 | Patsopoulos NA | Ann Neurol      | Multiple sclerosis | Other            | 8E-08 | 1.16 | [NR]        |            | rs2546890-A  | chr5  |
| 1146 | 21833088 | Sawcer S       | Nature          | Multiple sclerosis | Other            | 1E-11 | 1.11 | [1.10-1.13] |            | rs2546890-A  | chr5  |
| 1147 | 21833088 | Sawcer S       | Nature          | Multiple sclerosis | Other            | 8E-08 | 1.12 | [1.10-1.14] |            | rs2744148-G  | chr16 |
| 1148 | 21833088 | Sawcer S       | Nature          | Multiple sclerosis | Other            | 2E-06 | 1.08 | [1.07-1.09] |            | rs281380-G   | chr19 |
| 1149 | 18941528 | Comabella M    | PLoS One        | Multiple sclerosis | Other            | 9E-11 | 3.3  | [2.3-4.9]   |            | rs3129934-T  | chr6  |
| 1150 | 20159113 | Jakkula E      | Am J Hum Genet  | Multiple sclerosis | Other            | 2E-25 | 3.43 | [NR]        |            | rs3135338-A  | chr6  |
| 1151 | 21833088 | Sawcer S       | Nature          | Multiple sclerosis | Other            | 5E-09 | 1.11 | [1.10-1.13] |            | rs354033-G   | chr7  |
| 1152 | 21833088 | Sawcer S       | Nature          | Multiple sclerosis | Other            | 5E-07 | 1.09 | [1.08-1.11] |            | rs4075958-A  | chr5  |
| 1153 | 17660530 | Hafler DA      | N Engl J Med    | Multiple sclerosis | Other            | 4E-06 | 1.14 | [1.08-1.21] |            | rs6498169-G  | chr16 |
| 1154 | 19525955 | Bahlo          | Nat Genet       | Multiple sclerosis | Other            | 3E-06 | 1.17 | [NR]        |            | rs6604026-G  | chr1  |
| 1155 | 17660530 | Hafler DA      | N Engl J Med    | Multiple sclerosis | Other            | 8E-06 | 1.15 | [1.08-1.22] |            | rs6604026-C  | chr1  |
| 1156 | 22190364 | Patsopoulos NA | Ann Neurol      | Multiple sclerosis | Other            | 3E-08 | 1.17 | [NR]        |            | rs6718520-A  | chr2  |
| 1157 | 19525953 | De Jager PL    | Nat Genet       | Multiple sclerosis | Other            | 2E-06 | 1.12 | [1.02-1.23] |            | rs6897932-C  | chr5  |
| 1158 | 17660530 | Hafler DA      | N Engl J Med    | Multiple sclerosis | Other            | 3E-07 | 1.18 | [1.11-1.26] |            | rs6897932-C  | chr5  |
| 1159 | 19525955 | Bahlo          | Nat Genet       | Multiple sclerosis | Other            | 5E-11 | 1.23 | [NR]        |            | rs703842-A   | chr12 |
| 1160 | 20159113 | Jakkula E      | Am J Hum Genet  | Multiple sclerosis | Other            | 3E-10 | 1.15 | [1.10-1.20] |            | rs744166-G   | chr17 |
| 1161 | 21833088 | Sawcer S       | Nature          | Multiple sclerosis | Other            | 6E-07 | 1.12 | [1.10-1.14] |            | rs756699-A   | chr5  |
| 1162 | 21654844 | Briggs FB      | Genes Immun     | Multiple sclerosis | Other            | 8E-06 | 0.48 | [NR]        | unit incre | rs758944-T   | chr7  |
| 1163 | 22190364 | Patsopoulos NA | Ann Neurol      | Multiple sclerosis | Other            | 1E-07 | 1.15 | [NR]        |            | rs8070463-T  | chr17 |
| 1164 | 21833088 | Sawcer S       | Nature          | Multiple sclerosis | Other            | 1E-11 | 1.21 | [1.18-1.24] |            | rs9282641-G  | chr3  |
| 1165 | 20453840 | Sanna S        | Nat Genet       | Multiple sclerosis | Other            | 2E-10 | 1.4  | [1.27-1.57] |            | rs9657904-T  | chr3  |
| 1166 | 19198609 | Kathiresan S   | Nat Genet       | Myocardial infar   | Other            | 1E-08 | 1.15 | [1.10-1.21] |            | rs11206510-T | chr1  |
| 1167 | 19198609 | Kathiresan S   | Nat Genet       | Myocardial infar   | Other            | 2E-09 | 1.15 | [1.10-1.20] |            | rs1122608-G  | chr19 |
| 1168 | 19198609 | Kathiresan S   | Nat Genet       | Myocardial infar   | Other            | 1E-09 | 1.12 | [1.08-1.17] |            | rs12526453-C | chr6  |
| 1169 | 19198609 | Kathiresan S   | Nat Genet       | Myocardial infar   | Other            | 7E-09 | 1.17 | [1.11-1.24] |            | rs1746048-C  | chr10 |
| 1170 | 19198609 | Kathiresan S   | Nat Genet       | Myocardial infar   | Other            | 1E-09 | 1.14 | [1.10-1.19] |            | rs17465637-C | chr1  |
| 1171 | 19198609 | Kathiresan S   | Nat Genet       | Myocardial infar   | Other            | 3E-44 | 1.29 | [1.25-1.34] |            | rs4977574-G  | chr9  |
| 1172 | 19198609 | Kathiresan S   | Nat Genet       | Myocardial infar   | Other            | 1E-08 | 1.17 | [1.11-1.23] |            | rs6725887-C  | chr2  |
| 1173 | 21095009 | Li YJ          | Ophthalmology   | Myopia (patholo    | Other            | 8E-06 | 1.24 | [1.11-1.39] |            | rs6885224-C  | chr5  |
| 1174 | 20711174 | Hor H          | Nat Genet       | Narcolepsy         | Other            | 5E-07 | 1.54 | [1.30-1.95] |            | rs1154155-G  | chr14 |
| 1175 | 19412176 | Hallmayer J    | Nat Genet       | Narcolepsy         | Other            | 3E-22 | 1.69 | [1.52-1.88] |            | rs1154155-C  | chr14 |
| 1176 | 18820697 | Miyagawa T     | Nat Genet       | Narcolepsy         | Other            | 6E-08 | 1.63 | [1.37-1.95] |            | rs5770917-C  | chr22 |
| 1177 | 21273288 | Del Greco M F  | Hum Mol Genet   | Natriuretic pepti  | Other            | 7E-06 | 0.13 | [0.07-0.19] | un         | rs6009824-A  | chr22 |
| 1178 | 21124317 | Wang K         | Nature          | Neuroblastoma      | Other            | 8E-17 | 1.4  | [NR]        |            | rs4712653-C  | chr6  |
| 1179 | 21203500 | Lauc G         | PLoS Genet      | N-glycan levels    | Other            | 4E-17 | 0.41 | [0.31-0.51] | un         | rs3760776-A  | chr19 |
| 1180 | 21203500 | Lauc G         | PLoS Genet      | N-glycan levels    | Other            | 9E-10 | 0.3  | [0.20-0.40] | un         | rs3760776-A  | chr19 |
| 1181 | 21203500 | Lauc G         | PLoS Genet      | N-glycan levels    | Other            | 1E-12 | 0.34 | [0.24-0.44] | un         | rs3760776-A  | chr19 |
| 1182 | 21203500 | Lauc G         | PLoS Genet      | N-glycan levels    | Other            | 3E-12 | 0.34 | [0.24-0.44] | un         | rs3760776-A  | chr19 |
| 1183 | 21203500 | Lauc G         | PLoS Genet      | N-glycan levels    | Other            | 2E-08 | 0.17 | [0.11-0.23] | un         | rs7953249-G  | chr12 |
| 1184 | 17158188 | Bierut LJ      | Hum Mol Genet   | Nicotine depend    | Other            | 2E-06 | 1.46 | [1.23-1.73] |            | rs2836823-T  | chr21 |
| 1185 | 17158188 | Bierut LJ      | Hum Mol Genet   | Nicotine depend    | Other            | 6E-06 | 1.14 | [0.97-1.35] |            | rs4142041-G  | chr10 |
| 1186 | 20708005 | Chalasani N    | Gastroenterolog | Non-alcoholic fa   | Other            | 5E-06 | 0.75 | [NR]        | unit incre | rs10067427-G | chr5  |
| 1187 | 20708005 | Chalasani N    | Gastroenterolog | Non-alcoholic fa   | Other            | 8E-06 | 0.61 | [NR]        | unit incre | rs11083271-A | chr18 |
| 1188 | 20708005 | Chalasani N    | Gastroenterolog | Non-alcoholic fa   | Other            | 8E-07 | 0.36 | [NR]        | unit incre | rs887304-A   | chr12 |
| 1189 | 20708005 | Chalasani N    | Gastroenterolog | Non-alcoholic fa   | Other            | 9E-06 | 0.58 | [NR]        | unit incre | rs1305088-A  | chr13 |
| 1190 | 20708005 | Chalasani N    | Gastroenterolog | Non-alcoholic fa   | Other            | 2E-06 | 4.13 | [NR]        | unit incre | rs1529093-A  | chr2  |



|      |          |               |                  |                   |                 |        |       |                 |              |       |
|------|----------|---------------|------------------|-------------------|-----------------|--------|-------|-----------------|--------------|-------|
| 1191 | 20708005 | Chalasani N   | Gastroenterolog  | Non-alcoholic fa  | Other           | 7E-06  | 0.92  | [NR] unit incre | rs6079395-A  | chr20 |
| 1192 | 20708005 | Chalasani N   | Gastroenterolog  | Non-alcoholic fa  | Other           | 1E-06  | 0.74  | [NR] unit incre | rs643608-G   | chr21 |
| 1193 | 21866343 | Ahn MJ        | Hum Genet        | Non-small cell lu | Other           | 1E-06  | 1.47  | [1.27-1.72]     | rs11080466-C | chr18 |
| 1194 | 21079520 | Sato Y        | J Thorac Oncol   | Non-small cell lu | Other           | 3E-07  | 4.96  | [2.52-9.76] (C  | rs1209950-T  | chr21 |
| 1195 | 20876614 | Yoon KA       | Hum Mol Genet    | Non-small cell lu | Other           | 7E-06  | 1.3   | [1.10-1.54]     | rs16951095-C | chr18 |
| 1196 | 20876614 | Yoon KA       | Hum Mol Genet    | Non-small cell lu | Other           | 2E-08  | 1.3   | [1.19-1.42]     | rs2131877-G  | chr3  |
| 1197 | 20876614 | Yoon KA       | Hum Mol Genet    | Non-small cell lu | Other           | 8E-06  | 1.43  | [1.14-1.82]     | rs9303196-T  | chr17 |
| 1198 | 20023658 | Mangold E     | Nat Genet        | Nonsyndromic d    | Other           | 7E-06  | 1.5   | [1.32-1.69]     | rs17760296-G | chr17 |
| 1199 | 20023658 | Mangold E     | Nat Genet        | Nonsyndromic d    | Other           | 1E-08  | 1.38  | [1.21-1.56]     | rs227731-C   | chr17 |
| 1200 | 19270707 | Birnbaum S    | Nat Genet        | Nonsyndromic d    | Other           | 2E-06  | NR    | NR              | rs642961-A   | chr1  |
| 1201 | 19151714 | Meyre D       | Nat Genet        | Obesity           | Obesity         | 2E-07  | 1.56  | [1.10-2.78]     | rs10508503-C | chr10 |
| 1202 | 19151714 | Meyre D       | Nat Genet        | Obesity           | Obesity         | 1E-28  | 1.39  | [1.27-1.51]     | rs1421085-C  | chr16 |
| 1203 | 19151714 | Meyre D       | Nat Genet        | Obesity           | Obesity         | 5E-15  | 1.22  | [1.05-1.40]     | rs17782313-C | chr18 |
| 1204 | 21708048 | Jiao H        | BMC Med Genet    | Obesity           | Obesity         | 3E-10  | 1.26  | [1.12-1.41]     | rs2116830-G  | chr10 |
| 1205 | 21708048 | Jiao H        | BMC Med Genet    | Obesity           | Obesity         | 5E-17  | 1.36  | [1.20-1.55]     | rs988712-G   | chr11 |
| 1206 | 18159244 | Hinney A      | PLoS One         | Obesity (early o  | Obesity         | 1E-07  | 1.66  | [1.37-2.01]     | rs1121980-T  | chr16 |
| 1207 | 19553259 | Cotsapas C    | Hum Mol Genet    | Obesity (extrem   | Obesity         | 5E-06  | 1.41  | [1.21-1.63]     | rs12635698-C | chr13 |
| 1208 | 21935397 | Paternoster L | PLoS One         | Obesity (extrem   | Obesity         | 5E-06  | NR    | NR              | rs699363-G   | chr14 |
| 1209 | 21935397 | Paternoster L | PLoS One         | Obesity (extrem   | Obesity         | 3E-08  | NR    | NR              | rs734597-A   | chr6  |
| 1210 | 21935397 | Paternoster L | PLoS One         | Obesity (extrem   | Obesity         | 5E-06  | NR    | NR              | rs970843-C   | chr15 |
| 1211 | 19553259 | Cotsapas C    | Hum Mol Genet    | Obesity (extrem   | Obesity         | 6E-12  | 1.48  | [1.33-1.66]     | rs9941349-T  | chr16 |
| 1212 | 19714249 | Liu YZ        | PLoS One         | Obesity and ost   | Other           | 4E-07  | NR    | NR              | rs297325-C   | chr11 |
| 1213 | 19714249 | Liu YZ        | PLoS One         | Obesity and ost   | Other           | 5E-07  | NR    | NR              | rs4756846-C  | chr11 |
| 1214 | 17658951 | Scuteri A     | PLoS Genet       | Obesity-related   | Obesity         | 9E-07  | 0.13  | [NR] SD lower   | rs9930506-A  | chr16 |
| 1215 | 17658951 | Scuteri A     | PLoS Genet       | Obesity-related   | Obesity         | 9E-07  | 0.12  | [NR] SD lower   | rs9930506-A  | chr16 |
| 1216 | 17658951 | Scuteri A     | PLoS Genet       | Obesity-related   | Obesity         | 3E-08  | 0.16  | [NR] SD lower   | rs9930506-A  | chr16 |
| 1217 | 20548946 | Ramdas WD     | PLoS Genet       | Optic disc paran  | Other           | 5E-09  | 0.03  | [0.02-0.04] mn  | rs1362756-C  | chr16 |
| 1218 | 20548946 | Ramdas WD     | PLoS Genet       | Optic disc paran  | Other           | 3E-35  | 0.07  | [0.06-0.08] mn  | rs1900004-T  | chr10 |
| 1219 | 20395239 | Macgregor S   | Hum Mol Genet    | Optic disc size   | Other           | 6E-06  | 0.17  | [0.09-0.25] un  | rs10858945-A | chr12 |
| 1220 | 20395239 | Macgregor S   | Hum Mol Genet    | Optic disc size   | Other           | 3E-07  | 0.41  | [0.22-0.60] un  | rs491391-A   | chr2  |
| 1221 | 20395239 | Macgregor S   | Hum Mol Genet    | Optic disc size   | Other           | 9E-06  | 0.15  | [0.06-0.24] un  | rs10483727-C | chr14 |
| 1222 | 20395239 | Macgregor S   | Hum Mol Genet    | Optic disc size   | Other           | 9E-06  | 0.16  | [0.08-0.24] un  | rs735854-C   | chr22 |
| 1223 | 20112360 | Kerkhof HJ    | Arthritis Rheum  | Osteoarthritis    | Other           | 8E-08  | 1.14  | [1.09-1.19]     | rs3815148-C  | chr7  |
| 1224 | 18594024 | Sarasquete ME | Blood            | Osteonecrosis c   | Other           | 1E-06  | 12.75 | [3.7-43.5]      | rs1934951-T  | chr10 |
| 1225 | 20072603 | Guo Y         | PLoS Genet       | Osteoporosis      | Other           | 2E-09  | 2.25  | [1.72-2.94]     | rs13182402-G | chr5  |
| 1226 | 20548944 | Hsu YH        | PLoS Genet       | Osteoporosis      | Other           | 9E-07  | 0.13  | [NR] g/cm2 ind  | rs17184557-A | chr18 |
| 1227 | 20548944 | Hsu YH        | PLoS Genet       | Osteoporosis      | Other           | 1E-07  | 0.19  | [NR] unit decre | rs2278729-A  | chr2  |
| 1228 | 20548944 | Hsu YH        | PLoS Genet       | Osteoporosis      | Other           | 4E-07  | 0.17  | [NR] cm increa  | rs7227401-T  | chr18 |
| 1229 | 19862010 | Ganesh SK     | Nat Genet        | Other erythrocyt  | Other           | 1E-10  | 0     | [0.001-0.002]   | rs857721-A   | chr1  |
| 1230 | 20852632 | Goode EL      | Nat Genet        | Ovarian cancer    | Other           | 3E-09  | 1.19  | [1.12-1.25]     | rs10088218-G | chr8  |
| 1231 | 21623375 | Albagha OM    | Nat Genet        | Paget's disease   | Other           | 4E-38  | 1.67  | [1.54-1.80]     | rs1561570-T  | chr10 |
| 1232 | 20436471 | Albagha OM    | Nat Genet        | Paget's disease   | Other           | 2E-11  | 1.46  | [1.30-1.63]     | rs2957128-A  | chr18 |
| 1233 | 22158540 | Wu C          | Nat Genet        | Pancreatic cand   | Other           | 5E-06  | 1.24  | [1.13-1.35]     | rs10974531-A | chr9  |
| 1234 | 22158540 | Wu C          | Nat Genet        | Pancreatic cand   | Other           | 5E-11  | 1.23  | [1.16-1.31]     | rs12413624-T | chr10 |
| 1235 | 20686608 | Low SK        | PLoS One         | Pancreatic cand   | Other           | 7E-06  | 3.15  | [1.91-5.21]     | rs12615966-A | chr2  |
| 1236 | 22158540 | Wu C          | Nat Genet        | Pancreatic cand   | Other           | 4E-10  | 1.23  | [1.15-1.32]     | rs2255280-T  | chr5  |
| 1237 | 22158540 | Wu C          | Nat Genet        | Pancreatic cand   | Other           | 6E-06  | 1.2   | [1.11-1.29]     | rs2689154-G  | chr1  |
| 1238 | 22158540 | Wu C          | Nat Genet        | Pancreatic cand   | Other           | 2E-13  | 1.27  | [1.19-1.33]     | rs372883-T   | chr21 |
| 1239 | 20101243 | Petersen GM   | Nat Genet        | Pancreatic cand   | Other           | 2E-10  | 1.3   | [1.19-1.41]     | rs3790844-T  | chr1  |
| 1240 | 20101243 | Petersen GM   | Nat Genet        | Pancreatic cand   | Other           | 7E-07  | 1.19  | [1.11-1.27]     | rs401681-T   | chr5  |
| 1241 | 22158540 | Wu C          | Nat Genet        | Pancreatic cand   | Other           | 7E-07  | 1.2   | [1.12-1.30]     | rs4269383-C  | chr6  |
| 1242 | 22158540 | Wu C          | Nat Genet        | Pancreatic cand   | Other           | 1E-10  | 1.25  | [1.17-1.34]     | rs5768709-G  | chr22 |
| 1243 | 20686608 | Low SK        | PLoS One         | Pancreatic cand   | Other           | 5E-06  | 1.45  | [1.24-1.71]     | rs7832232-A  | chr8  |
| 1244 | 22158540 | Wu C          | Nat Genet        | Pancreatic cand   | Other           | 1E-06  | 1.27  | [1.15-1.39]     | rs9363918-A  | chr6  |
| 1245 | 22158540 | Wu C          | Nat Genet        | Pancreatic cand   | Other           | 5E-13  | 1.26  | [1.18-1.34]     | rs9573163-G  | chr13 |
| 1246 | 20070850 | Edwards TL    | Ann Hum Genet    | Parkinson's dise  | Other           | 3E-06  | 1.33  | [1.19-1.52]     | rs10464059-A | chr5  |
| 1247 | 21044948 | Spencer CC    | Hum Mol Genet    | Parkinson's dise  | Other           | 3E-06  | 1.23  | [1.13-1.33]     | rs7617877-A  | chr3  |
| 1248 | 19772629 | Latourelle JC | BMC Med Genet    | Parkinson's dise  | Other           | 9E-06  | 6.85  | [NR] years you  | rs7577851-T  | chr2  |
| 1249 | 18985386 | Pankratz N    | Hum Genet        | Parkinson's dise  | Other           | 7E-07  | 1.7   | [NR]            | rs1564282-T  | chr4  |
| 1250 | 19897590 | Schaefer AS   | Hum Mol Genet    | Periodontitis     | Other           | 6E-09  | 1.59  | [1.36-1.86]     | rs1537415-G  | chr9  |
| 1251 | 20610895 | Koriyama H    | J Atheroscler Tr | Peripheral arter  | Coronary Artery | 2E-06  | 1.84  | [1.43-2.37]     | rs2359536-C  | chr10 |
| 1252 | 18957941 | Terracciano A | Mol Psychiatry   | Personality dim   | Other           | 3E-06  | 0.13  | [NR] s.d. incre | rs2540226-T  | chr2  |
| 1253 | 21829377 | Lemaitre RN   | PLoS Genet       | Phospholipid lev  | Other           | 8E-08  | 0.02  | [NR] % increa   | rs10792320-A | chr11 |
| 1254 | 21829377 | Lemaitre RN   | PLoS Genet       | Phospholipid lev  | Other           | 5E-11  | 0.04  | [NR] % decrea   | rs1321535-T  | chr6  |
| 1255 | 21829377 | Lemaitre RN   | PLoS Genet       | Phospholipid lev  | Other           | 1E-38  | 0.04  | [NR] % decrea   | rs1321535-T  | chr6  |
| 1256 | 21829377 | Lemaitre RN   | PLoS Genet       | Phospholipid lev  | Other           | 2E-07  | 0.07  | [NR] % increa   | rs1514178-T  | chr1  |
| 1257 | 21829377 | Lemaitre RN   | PLoS Genet       | Phospholipid lev  | Other           | 4E-154 | 0.07  | [NR] % increa   | rs174547-T   | chr11 |
| 1258 | 21829377 | Lemaitre RN   | PLoS Genet       | Phospholipid lev  | Other           | 3E-64  | 0.02  | [NR] % decrea   | rs174547-T   | chr11 |
| 1259 | 21829377 | Lemaitre RN   | PLoS Genet       | Phospholipid lev  | Other           | 1E-15  | 0.11  | [NR] % decrea   | rs2236212-C  | chr6  |
| 1260 | 21829377 | Lemaitre RN   | PLoS Genet       | Phospholipid lev  | Other           | 1E-43  | 0.04  | [NR] % decrea   | rs3734398-T  | chr6  |
| 1261 | 21829377 | Lemaitre RN   | PLoS Genet       | Phospholipid lev  | Other           | 9E-60  | 0.02  | [NR] % increa   | rs4246215-T  | chr11 |
| 1262 | 21829377 | Lemaitre RN   | PLoS Genet       | Phospholipid lev  | Other           | 1E-139 | 0.07  | [NR] % decrea   | rs4246215-T  | chr11 |
| 1263 | 21829377 | Lemaitre RN   | PLoS Genet       | Phospholipid lev  | Other           | 6E-55  | 0.08  | [NR] % decrea   | rs4246215-T  | chr11 |
| 1264 | 21829377 | Lemaitre RN   | PLoS Genet       | Phospholipid lev  | Other           | 5E-13  | 0.01  | [NR] % decrea   | rs4711171-T  | chr6  |
| 1265 | 21829377 | Lemaitre RN   | PLoS Genet       | Phospholipid lev  | Other           | 9E-09  | 0.02  | [NR] % increa   | rs780094-T   | chr2  |
| 1266 | 21829377 | Lemaitre RN   | PLoS Genet       | Phospholipid lev  | Other           | 4E-07  | 0.05  | [NR] % increa   | rs9586179-T  | chr13 |

|      |          |                |               |                   |         |        |      |                 |                    |              |       |
|------|----------|----------------|---------------|-------------------|---------|--------|------|-----------------|--------------------|--------------|-------|
| 1267 | 20526338 | Johnson AD     | Nat Genet     | Platelet aggrega  | Other   | 7E-06  | NR   | NR              |                    | rs179429-A   | chr11 |
| 1268 | 20526338 | Johnson AD     | Nat Genet     | Platelet aggrega  | Other   | 7E-07  | NR   | NR              |                    | rs525455-G   | chr10 |
| 1269 | 22139419 | Gieger C       | Nature        | Platelet counts   | Other   | 2E-14  | 3.64 | [2.70-4.57]     | 10                 | rs10512472-C | chr17 |
| 1270 | 22139419 | Gieger C       | Nature        | Platelet counts   | Other   | 2E-10  | 3.01 | [2.08-3.95]     | 10                 | rs11789898-T | chr9  |
| 1271 | 22139419 | Gieger C       | Nature        | Platelet counts   | Other   | 1E-11  | 3.41 | [2.43-4.40]     | 10                 | rs1719271-G  | chr15 |
| 1272 | 22139419 | Gieger C       | Nature        | Platelet counts   | Other   | 4E-10  | 2.6  | [1.79-3.41]     | 10                 | rs17356664-C | chr19 |
| 1273 | 22139419 | Gieger C       | Nature        | Platelet counts   | Other   | 1E-09  | 6.07 | [4.13-8.02]     | 10                 | rs17568628-T | chr5  |
| 1274 | 22139419 | Gieger C       | Nature        | Platelet counts   | Other   | 1E-10  | 2.39 | [1.67-3.12]     | 10                 | rs2070729-A  | chr5  |
| 1275 | 22139419 | Gieger C       | Nature        | Platelet counts   | Other   | 2E-10  | 3.54 | [2.45-4.62]     | 10                 | rs2297067-T  | chr14 |
| 1276 | 22139419 | Gieger C       | Nature        | Platelet counts   | Other   | 1E-10  | 2.35 | [1.63-3.06]     | 10                 | rs399604-C   | chr6  |
| 1277 | 22139419 | Gieger C       | Nature        | Platelet counts   | Other   | 3E-10  | 2.45 | [1.69-3.22]     | 10                 | rs4246215-T  | chr11 |
| 1278 | 22139419 | Gieger C       | Nature        | Platelet counts   | Other   | 8E-18  | 3.08 | [2.38-3.78]     | 10                 | rs441460-G   | chr6  |
| 1279 | 22139419 | Gieger C       | Nature        | Platelet counts   | Other   | 8E-11  | 4.73 | [3.31-6.15]     | 10                 | rs4938642-C  | chr11 |
| 1280 | 22139419 | Gieger C       | Nature        | Platelet counts   | Other   | 3E-18  | 3.26 | [2.53-4]        | 10 <sup>9</sup> /l | rs559972-T   | chr17 |
| 1281 | 22139419 | Gieger C       | Nature        | Platelet counts   | Other   | 4E-11  | 2.53 | [1.78-3.28]     | 10                 | rs7342306-G  | chr12 |
| 1282 | 22139419 | Gieger C       | Nature        | Platelet counts   | Other   | 3E-11  | 2.76 | [1.94-3.57]     | 10                 | rs7641175-A  | chr3  |
| 1283 | 22139419 | Gieger C       | Nature        | Platelet counts   | Other   | 1E-10  | 3.92 | [2.73-5.12]     | 10                 | rs7961894-C  | chr12 |
| 1284 | 21151128 | Chen ZJ        | Nat Genet     | Polycystic ovary  | Other   | 9E-18  | 1.51 | [1.37-1.65]     |                    | rs10818854-A | chr9  |
| 1285 | 21151128 | Chen ZJ        | Nat Genet     | Polycystic ovary  | Other   | 3E-23  | 1.39 | [1.30-1.49]     |                    | rs12478601-C | chr2  |
| 1286 | 21151128 | Chen ZJ        | Nat Genet     | Polycystic ovary  | Other   | 8E-21  | 1.41 | [1.30-1.49]     |                    | rs13405728-A | chr2  |
| 1287 | 21151128 | Chen ZJ        | Nat Genet     | Polycystic ovary  | Other   | 2E-23  | 1.49 | [1.39-1.61]     |                    | rs13429458-A | chr2  |
| 1288 | 21151128 | Chen ZJ        | Nat Genet     | Polycystic ovary  | Other   | 8E-19  | 1.34 | [1.26-1.43]     |                    | rs2479106-G  | chr9  |
| 1289 | 20062060 | Pfeufer A      | Nat Genet     | PR interval       | Other   | 5E-11  | 1.36 | [0.95-1.77]     | ms                 | rs11897119-C | chr2  |
| 1290 | 20062060 | Pfeufer A      | Nat Genet     | PR interval       | Other   | 9E-13  | 1.49 | [1.08-1.90]     | ms                 | rs251253-C   | chr5  |
| 1291 | 20062060 | Pfeufer A      | Nat Genet     | PR interval       | Other   | 3E-08  | 1.19 | [0.77-1.61]     | ms                 | rs4944092-G  | chr11 |
| 1292 | 21399635 | Mells GF       | Nat Genet     | Primary biliary c | Other   | 9E-17  | 1.58 | [1.41-1.76]     |                    | rs12531711-G | chr7  |
| 1293 | 21399635 | Mells GF       | Nat Genet     | Primary biliary c | Other   | 3E-12  | 1.29 | [1.20-1.38]     |                    | rs12924729-G | chr16 |
| 1294 | 21399635 | Mells GF       | Nat Genet     | Primary biliary c | Other   | 3E-11  | 1.35 | [1.23-1.47]     |                    | rs2293370-G  | chr3  |
| 1295 | 20639880 | Liu X          | Nat Genet     | Primary biliary c | Other   | 8E-12  | 1.48 | [NR]            |                    | rs3790567-A  | chr1  |
| 1296 | 19458352 | Hirschfield GM | N Engl J Med  | Primary biliary c | Other   | 3E-11  | 1.51 | [1.33-1.70]     |                    | rs3790567-A  | chr1  |
| 1297 | 21399635 | Mells GF       | Nat Genet     | Primary biliary c | Other   | 2E-16  | 1.38 | [1.28-1.50]     |                    | rs485499-T   | chr3  |
| 1298 | 21399635 | Mells GF       | Nat Genet     | Primary biliary c | Other   | 4E-12  | 1.26 | [1.18-1.34]     |                    | rs7665090-C  | chr4  |
| 1299 | 19458352 | Hirschfield GM | N Engl J Med  | Primary biliary c | Other   | 8E-06  | 1.29 | [1.15-1.44]     |                    | rs907092-A   | chr17 |
| 1300 | 20639880 | Liu X          | Nat Genet     | Primary biliary c | Other   | 2E-09  | 1.38 | [NR]            |                    | rs9303277-T  | chr17 |
| 1301 | 20195514 | Pillas D       | PLoS Genet    | Primary tooth de  | Other   | 9E-07  | 0.18 | [NR] % varian   |                    | rs10506525-C | chr12 |
| 1302 | 20195514 | Pillas D       | PLoS Genet    | Primary tooth de  | Other   | 3E-08  | 0.51 | [NR] % varian   |                    | rs1956529-T  | chr14 |
| 1303 | 20195514 | Pillas D       | PLoS Genet    | Primary tooth de  | Other   | 6E-07  | 0.44 | [NR] % varian   |                    | rs6504340-G  | chr17 |
| 1304 | 20195514 | Pillas D       | PLoS Genet    | Primary tooth de  | Other   | 6E-09  | 0.46 | [NR] % varian   |                    | rs10506525-C | chr12 |
| 1305 | 21873549 | Strawbridge RJ | Diabetes      | Proinsulin levels | Insulin | 3E-09  | NR   | NR              |                    | rs4790333-T  | chr17 |
| 1306 | 19767754 | Gudmundsson J  | Nat Genet     | Prostate cancer   | Other   | 3E-10  | 1.12 | [1.08-1.16]     |                    | rs10934853-A | chr3  |
| 1307 | 21743057 | Schumacher FR  | Hum Mol Genet | Prostate cancer   | Other   | 4E-06  | 1.12 | [1.05-1.18]     |                    | rs13252298-A | chr8  |
| 1308 | 19767753 | Eeles RA       | Nat Genet     | Prostate cancer   | Other   | 3E-30  | 1.18 | [1.14-1.22]     |                    | rs1512268-A  | chr8  |
| 1309 | 19767754 | Gudmundsson J  | Nat Genet     | Prostate cancer   | Other   | 3E-14  | 1.8  | [1.55-2.09]     |                    | rs16901979-A | chr8  |
| 1310 | 17401366 | Gudmundsson J  | Nat Genet     | Prostate cancer   | Other   | 1E-12  | 1.79 | [1.53-2.11] (E  |                    | rs16901979-A | chr8  |
| 1311 | 19767753 | Eeles RA       | Nat Genet     | Prostate cancer   | Other   | 4E-15  | 1.11 | [1.08-1.15]     |                    | rs17021918-C | chr4  |
| 1312 | 19767753 | Eeles RA       | Nat Genet     | Prostate cancer   | Other   | 3E-08  | NR   | NR              |                    | rs17181170-G | chr3  |
| 1313 | 20676098 | Takata R       | Nat Genet     | Prostate cancer   | Other   | 8E-08  | 1.15 | [1.09-1.21]     |                    | rs1983891-T  | chr6  |
| 1314 | 19767753 | Eeles RA       | Nat Genet     | Prostate cancer   | Other   | 1E-19  | NR   | NR              |                    | rs3123078-T  | chr10 |
| 1315 | 20676098 | Takata R       | Nat Genet     | Prostate cancer   | Other   | 2E-12  | 1.22 | [1.15-1.28]     |                    | rs339331-T   | chr6  |
| 1316 | 18264096 | Thomas G       | Nat Genet     | Prostate cancer   | Other   | 3E-19  | 1.66 | [1.47-1.87]     |                    | rs4242382-A  | chr8  |
| 1317 | 21743057 | Schumacher FR  | Hum Mol Genet | Prostate cancer   | Other   | 3E-16  | 1.56 | [1.40-1.73]     |                    | rs4242384-C  | chr8  |
| 1318 | 19767753 | Eeles RA       | Nat Genet     | Prostate cancer   | Other   | 2E-24  | NR   | NR              |                    | rs4242384-A  | chr8  |
| 1319 | 18264097 | Eeles RA       | Nat Genet     | Prostate cancer   | Other   | 3E-16  | 1.88 | [NR]            |                    | rs4242384-C  | chr8  |
| 1320 | 19767753 | Eeles RA       | Nat Genet     | Prostate cancer   | Other   | 6E-29  | 1.16 | [1.14-1.20]     |                    | rs759167-T   | chr22 |
| 1321 | 21743057 | Schumacher FR  | Hum Mol Genet | Prostate cancer   | Other   | 2E-10  | 1.15 | [1.10-1.20]     |                    | rs651164-G   | chr6  |
| 1322 | 19767753 | Eeles RA       | Nat Genet     | Prostate cancer   | Other   | 2E-09  | NR   | NR              |                    | rs651164-A   | chr6  |
| 1323 | 21743057 | Schumacher FR  | Hum Mol Genet | Prostate cancer   | Other   | 9E-06  | 1.2  | [1.11-1.32]     |                    | rs6983267-G  | chr8  |
| 1324 | 18264097 | Eeles RA       | Nat Genet     | Prostate cancer   | Other   | 9E-13  | 1.42 | [NR]            |                    | rs6983267-G  | chr8  |
| 1325 | 18264096 | Thomas G       | Nat Genet     | Prostate cancer   | Other   | 7E-12  | 1.28 | [1.15-1.45]     |                    | rs6983267-G  | chr8  |
| 1326 | 17401363 | Yeager M       | Nat Genet     | Prostate cancer   | Other   | 9E-13  | 1.26 | [1.13-1.41]     |                    | rs6983267-G  | chr8  |
| 1327 | 21743057 | Schumacher FR  | Hum Mol Genet | Prostate cancer   | Other   | 9E-09  | 1.31 | [1.20-1.44]     |                    | rs7130881-G  | chr11 |
| 1328 | 19767753 | Eeles RA       | Nat Genet     | Prostate cancer   | Other   | 8E-13  | NR   | NR              |                    | rs7130881-G  | chr11 |
| 1329 | 21743057 | Schumacher FR  | Hum Mol Genet | Prostate cancer   | Other   | 6E-06  | 1.16 | [1.01-1.23]     |                    | rs742134-G   | chr22 |
| 1330 | 21743057 | Schumacher FR  | Hum Mol Genet | Prostate cancer   | Other   | 1E-07  | 1.06 | [1.04-1.09]     |                    | rs7629490-T  | chr3  |
| 1331 | 21743057 | Schumacher FR  | Hum Mol Genet | Prostate cancer   | Other   | 5E-09  | 1.17 | [1.11-1.24]     |                    | rs902774-A   | chr12 |
| 1332 | 20802025 | Tang W         | Blood         | Protein C levels  | Other   | 7E-37  | 0.14 | [0.12-0.16]     | ug                 | rs6120849-T  | chr20 |
| 1333 | 20802025 | Tang W         | Blood         | Protein C levels  | Other   | 2E-200 | 0.47 | [0.44-0.50]     | ug                 | rs867186-C   | chr20 |
| 1334 | 19169254 | Nair RP        | Nat Genet     | Psoriasis         | Other   | 6E-06  | 1.09 | [NR]            |                    | rs1076160-T  | chr9  |
| 1335 | 19169254 | Nair RP        | Nat Genet     | Psoriasis         | Other   | 1E-100 | 2.64 | [NR]            |                    | rs12191877-T | chr6  |
| 1336 | 20953190 | Strange A      | Nat Genet     | Psoriasis         | Other   | 1E-13  | 1.29 | [1.17-1.43]     |                    | rs17716942-A | chr2  |
| 1337 | 19169254 | Nair RP        | Nat Genet     | Psoriasis         | Other   | 1E-20  | 1.59 | [NR]            |                    | rs17728338-A | chr5  |
| 1338 | 19169254 | Nair RP        | Nat Genet     | Psoriasis         | Other   | 5E-15  | 1.27 | [NR]            |                    | rs20541-G    | chr5  |
| 1339 | 19169254 | Nair RP        | Nat Genet     | Psoriasis         | Other   | 2E-28  | 1.44 | [NR]            |                    | rs2082412-G  | chr5  |
| 1340 | 19169254 | Nair RP        | Nat Genet     | Psoriasis         | Other   | 3E-08  | 1.13 | [NR]            |                    | rs2201841-G  | chr1  |
| 1341 | 20953188 | Ellinghaus E   | Nat Genet     | Psoriasis         | Other   | 1E-20  | 1.54 | [1.32-1.79] (Pa |                    | rs2546890-A  | chr5  |
| 1342 | 19169255 | Zhang XJ       | Nat Genet     | Psoriasis         | Other   | 3E-26  | 1.28 | [1.23-1.35]     |                    | rs3213094-A  | chr5  |

|      |          |                 |                 |                    |                  |       |      |                 |  |              |       |
|------|----------|-----------------|-----------------|--------------------|------------------|-------|------|-----------------|--|--------------|-------|
| 1343 | 20953189 | Stuart PE       | Nat Genet       | Psoriasis          | Other            | 4E-11 | 1.19 | [NR]            |  | rs4795067-G  | chr17 |
| 1344 | 20953190 | Strange A       | Nat Genet       | Psoriasis          | Other            | 4E-09 | 1.12 | [1.04-1.20]     |  | rs702873-G   | chr2  |
| 1345 | 20932310 | Han MR          | BMC Neurol      | P-tau181p          | Other            | 1E-07 | NR   | NR              |  | rs7558386-G  | chr2  |
| 1346 | 21946350 | Artigas MS      | Nat Genet       | Pulmonary func     | Other            | 2E-07 | 0.03 | [0.015-0.035]   |  | rs12716852-G | chr16 |
| 1347 | 21946350 | Soler Artigas M | Nat Genet       | Pulmonary func     | Other            | 2E-08 | 0.03 | [0.021-0.041]   |  | rs153916-T   | chr5  |
| 1348 | 21946350 | Soler Artigas M | Nat Genet       | Pulmonary func     | Other            | 2E-06 | 0.03 | [0.014-0.038]   |  | rs1551943-G  | chr5  |
| 1349 | 21946350 | Soler Artigas M | Nat Genet       | Pulmonary func     | Other            | 2E-07 | 0.03 | [0.018-0.038]   |  | rs1928168-T  | chr6  |
| 1350 | 20010835 | Hancock DB      | Nat Genet       | Pulmonary func     | Other            | 3E-20 | 0.52 | [NR] % increa   |  | rs1980057-T  | chr4  |
| 1351 | 21946350 | Soler Artigas M | Nat Genet       | Pulmonary func     | Other            | 9E-06 | 0.03 | [0.014-0.038]   |  | rs2544527-T  | chr2  |
| 1352 | 21946350 | Artigas MS      | Nat Genet       | Pulmonary func     | Other            | 5E-06 | 0.03 | [0.018-0.042]   |  | rs2798641-T  | chr6  |
| 1353 | 21946350 | Soler Artigas M | Nat Genet       | Pulmonary func     | Other            | 8E-09 | 0.04 | [0.027-0.055]   |  | rs2798641-T  | chr6  |
| 1354 | 21946350 | Soler Artigas M | Nat Genet       | Pulmonary func     | Other            | 2E-10 | 0.04 | [0.025-0.049]   |  | rs2857595-G  | chr6  |
| 1355 | 21946350 | Artigas MS      | Nat Genet       | Pulmonary func     | Other            | 4E-06 | 0.06 | [0.031-0.079]   |  | rs3734729-G  | chr6  |
| 1356 | 20010834 | Repapi E        | Nat Genet       | Pulmonary func     | Other            | 4E-09 | 0.07 | [NR] % varian   |  | rs3995090-C  | chr5  |
| 1357 | 21946350 | Soler Artigas M | Nat Genet       | Pulmonary func     | Other            | 8E-06 | 0.03 | [0.015-0.039]   |  | rs4762767-G  | chr12 |
| 1358 | 21946350 | Artigas MS      | Nat Genet       | Pulmonary func     | Other            | 3E-12 | 0.03 | [0.021-0.037]   |  | rs7068966-T  | chr10 |
| 1359 | 21946350 | Soler Artigas M | Nat Genet       | Pulmonary func     | Other            | 6E-13 | 0.03 | [0.023-0.042]   |  | rs7068966-T  | chr10 |
| 1360 | 19300500 | Wilk JB         | PLoS Genet      | Pulmonary func     | Other            | 8E-11 | 0.1  | [NR] % increa   |  | rs13147758-G | chr4  |
| 1361 | 20031603 | Marroni F       | Circ Cardiovasc | QT interval        | Other            | 2E-06 | 0.26 | [0.16-0.36] un  |  | rs10488031-A | chr7  |
| 1362 | 20031603 | Marroni F       | Circ Cardiovasc | QT interval        | Other            | 8E-07 | 0.28 | [0.16-0.40] un  |  | rs4318720-A  | chr4  |
| 1363 | 19305409 | Pfeuffer A      | Nat Genet       | QT interval        | Other            | 7E-33 | 2.19 | [1.76-2.62] ms  |  | rs4657178-T  | chr1  |
| 1364 | 20031603 | Marroni F       | Circ Cardiovasc | QT interval        | Other            | 7E-07 | 0.19 | [0.11-0.27] un  |  | rs6845865-G  | chr4  |
| 1365 | 19197348 | Lowe JK         | PLoS Genet      | Quantitative trait | Other            | 5E-06 | 0.21 | [NR] mg/L incr  |  | rs1039302-T  | chr12 |
| 1366 | 19197348 | Lowe JK         | PLoS Genet      | Quantitative trait | Other            | 3E-06 | 0.44 | [NR] inch decr  |  | rs10486715-A | chr7  |
| 1367 | 19197348 | Lowe JK         | PLoS Genet      | Quantitative trait | Other            | 9E-06 | 0.23 | [NR] mg/dL incr |  | rs10498712-G | chr6  |
| 1368 | 19197348 | Lowe JK         | PLoS Genet      | Quantitative trait | Other            | 6E-06 | 0.18 | [NR] mm Hg d    |  | rs10508517-A | chr10 |
| 1369 | 19197348 | Lowe JK         | PLoS Genet      | Quantitative trait | Hypertriglycerid | 7E-06 | 0.19 | [NR] mg/dL incr |  | rs10518224-A | chr4  |
| 1370 | 19197348 | Lowe JK         | PLoS Genet      | Quantitative trait | Other            | 2E-06 | 0.29 | [NR] mL/U/L de  |  | rs10848704-C | chr12 |
| 1371 | 19197348 | Lowe JK         | PLoS Genet      | Quantitative trait | Obesity          | 4E-06 | 0.36 | [NR] lb. decrea |  | rs10928195-C | chr2  |
| 1372 | 19197348 | Lowe JK         | PLoS Genet      | Quantitative trait | Other            | 5E-06 | 0.26 | [NR] mg/L incr  |  | rs11066587-G | chr12 |
| 1373 | 19197348 | Lowe JK         | PLoS Genet      | Quantitative trait | Other            | 9E-06 | 0.18 | [NR] mg/dL de   |  | rs17157663-A | chr7  |
| 1374 | 19197348 | Lowe JK         | PLoS Genet      | Quantitative trait | Obesity          | 9E-06 | 0.22 | [NR] lb. increa |  | rs1874326-G  | chr7  |
| 1375 | 19197348 | Lowe JK         | PLoS Genet      | Quantitative trait | Obesity          | 8E-07 | 0.22 | [NR] inch decr  |  | rs222328-C   | chr3  |
| 1376 | 19197348 | Lowe JK         | PLoS Genet      | Quantitative trait | Obesity          | 3E-06 | 0.21 | [NR] lb. decrea |  | rs2225614-C  | chr9  |
| 1377 | 19197348 | Lowe JK         | PLoS Genet      | Quantitative trait | Other            | 3E-06 | 0.27 | [NR] mm Hg d    |  | rs2527866-C  | chr7  |
| 1378 | 19197348 | Lowe JK         | PLoS Genet      | Quantitative trait | Other            | 6E-06 | 0.58 | [NR] mm Hg d    |  | rs254893-A   | chr5  |
| 1379 | 19197348 | Lowe JK         | PLoS Genet      | Quantitative trait | Other            | 6E-06 | 0.19 | [NR] mg/dL incr |  | rs3846663-T  | chr5  |
| 1380 | 19197348 | Lowe JK         | PLoS Genet      | Quantitative trait | Other            | 1E-06 | 0.21 | [NR] mg/dL incr |  | rs3846663-T  | chr5  |
| 1381 | 19197348 | Lowe JK         | PLoS Genet      | Quantitative trait | Hypertriglycerid | 5E-06 | 0.22 | [NR] mg/dL incr |  | rs4420638-G  | chr19 |
| 1382 | 19197348 | Lowe JK         | PLoS Genet      | Quantitative trait | Other            | 3E-07 | 0.28 | [NR] mg/dL incr |  | rs4420638-G  | chr19 |
| 1383 | 19197348 | Lowe JK         | PLoS Genet      | Quantitative trait | Other            | 2E-06 | 0.28 | [NR] mg/L decr  |  | rs4420638-G  | chr19 |
| 1384 | 19197348 | Lowe JK         | PLoS Genet      | Quantitative trait | Obesity          | 2E-06 | 0.85 | [NR] % increa   |  | rs6066084-A  | chr20 |
| 1385 | 19197348 | Lowe JK         | PLoS Genet      | Quantitative trait | Other            | 1E-06 | 0.36 | [NR] mL/U/L de  |  | rs6462411-C  | chr7  |
| 1386 | 19197348 | Lowe JK         | PLoS Genet      | Quantitative trait | Other            | 5E-06 | 0.23 | [NR] mg/dL incr |  | rs655601-A   | chr5  |
| 1387 | 19197348 | Lowe JK         | PLoS Genet      | Quantitative trait | Obesity          | 8E-06 | 0.34 | [NR] % decrea   |  | rs6560749-T  | chr10 |
| 1388 | 19197348 | Lowe JK         | PLoS Genet      | Quantitative trait | Obesity          | 2E-06 | 0.32 | [NR] kg/m2 de   |  | rs6560749-T  | chr10 |
| 1389 | 19197348 | Lowe JK         | PLoS Genet      | Quantitative trait | Other            | 8E-06 | 0.49 | [NR] mL/U/L de  |  | rs6909430-G  | chr6  |
| 1390 | 19197348 | Lowe JK         | PLoS Genet      | Quantitative trait | Other            | 1E-06 | 0.19 | [NR] mm Hg ir   |  | rs7069923-C  | chr10 |
| 1391 | 19197348 | Lowe JK         | PLoS Genet      | Quantitative trait | Hypertriglycerid | 1E-09 | 0.23 | [NR] mg/dL incr |  | rs7396835-T  | chr11 |
| 1392 | 19197348 | Lowe JK         | PLoS Genet      | Quantitative trait | Other            | 6E-06 | 0.22 | [NR] mg/L decr  |  | rs7561273-A  | chr2  |
| 1393 | 19197348 | Lowe JK         | PLoS Genet      | Quantitative trait | Other            | 6E-06 | 0.35 | [NR] mg/dL de   |  | rs7895372-G  | chr10 |
| 1394 | 19430482 | Kottgen A       | Nat Genet       | Renal function a   | Other            | 1E-12 | 0.01 | [0.008-0.016]   |  | rs17319721-A | chr4  |
| 1395 | 22044751 | Foster MC       | BMC Med Gene    | Renal sinus fat    | Other            | 6E-06 | 0.31 | [0.18-0.45] un  |  | rs1572050-A  | chr13 |
| 1396 | 22044751 | Foster MC       | BMC Med Gene    | Renal sinus fat    | Other            | 3E-06 | 0.18 | [0.11-0.26] un  |  | rs580140-G   | chr21 |
| 1397 | 22044751 | Foster MC       | BMC Med Gene    | Renal sinus fat    | Other            | 6E-06 | 0.16 | [0.089-0.227]   |  | rs9375674-A  | chr6  |
| 1398 | 22041458 | Clark SL        | Psychol Med     | Response to an     | Other            | 2E-07 | NR   | NR              |  | rs10517287-T | chr4  |
| 1399 | 22041458 | Clark SL        | Psychol Med     | Response to an     | Other            | 2E-07 | NR   | NR              |  | rs10857636-T | chr10 |
| 1400 | 22041458 | Clark SL        | Psychol Med     | Response to an     | Other            | 3E-06 | NR   | NR              |  | rs10988449-T | chr9  |
| 1401 | 22041458 | Clark SL        | Psychol Med     | Response to an     | Other            | 2E-07 | NR   | NR              |  | rs11949289-T | chr5  |
| 1402 | 22041458 | Clark SL        | Psychol Med     | Response to an     | Other            | 2E-06 | NR   | NR              |  | rs12157904-G | chr22 |
| 1403 | 22041458 | Clark SL        | Psychol Med     | Response to an     | Other            | 9E-08 | NR   | NR              |  | rs13432159-G | chr2  |
| 1404 | 22041458 | Clark SL        | Psychol Med     | Response to an     | Other            | 7E-07 | NR   | NR              |  | rs16861531-G | chr2  |
| 1405 | 22041458 | Clark SL        | Psychol Med     | Response to an     | Other            | 3E-06 | NR   | NR              |  | rs17150687-C | chr7  |
| 1406 | 22041458 | Clark SL        | Psychol Med     | Response to an     | Other            | 4E-07 | NR   | NR              |  | rs17647114-T | chr15 |
| 1407 | 22041458 | Clark SL        | Psychol Med     | Response to an     | Other            | 3E-07 | NR   | NR              |  | rs17766217-A | chr8  |
| 1408 | 22041458 | Clark SL        | Psychol Med     | Response to an     | Other            | 2E-06 | NR   | NR              |  | rs2034588-G  | chr16 |
| 1409 | 22041458 | Clark SL        | Psychol Med     | Response to an     | Other            | 3E-06 | NR   | NR              |  | rs2163287-A  | chr6  |
| 1410 | 22041458 | Clark SL        | Psychol Med     | Response to an     | Other            | 5E-07 | NR   | NR              |  | rs2742417-T  | chr3  |
| 1411 | 22041458 | Clark SL        | Psychol Med     | Response to an     | Other            | 2E-06 | NR   | NR              |  | rs491376-C   | chr4  |
| 1412 | 22041458 | Clark SL        | Psychol Med     | Response to an     | Other            | 4E-07 | NR   | NR              |  | rs527430-G   | chr1  |
| 1413 | 22041458 | Clark SL        | Psychol Med     | Response to an     | Other            | 1E-06 | NR   | NR              |  | rs573332-G   | chr4  |
| 1414 | 22041458 | Clark SL        | Psychol Med     | Response to an     | Other            | 4E-07 | NR   | NR              |  | rs6724422-T  | chr2  |
| 1415 | 22041458 | Clark SL        | Psychol Med     | Response to an     | Other            | 2E-06 | NR   | NR              |  | rs6795349-G  | chr3  |
| 1416 | 22041458 | Clark SL        | Psychol Med     | Response to an     | Other            | 1E-06 | NR   | NR              |  | rs7015622-C  | chr8  |
| 1417 | 22041458 | Clark SL        | Psychol Med     | Response to an     | Other            | 3E-07 | NR   | NR              |  | rs7136572-G  | chr12 |
| 1418 | 22041458 | Clark SL        | Psychol Med     | Response to an     | Other            | 5E-07 | NR   | NR              |  | rs8039808-A  | chr15 |

|      |          |                |                 |                  |       |       |       |              |              |       |
|------|----------|----------------|-----------------|------------------|-------|-------|-------|--------------|--------------|-------|
| 1419 | 21659360 | Wade R         | Haematologica   | Response to an   | Other | 5E-06 | 2.27  | [0.31-0.63]  | rs1168987-A  | chr14 |
| 1420 | 21659360 | Wade R         | Haematologica   | Response to an   | Other | 8E-07 | 2.36  | [1.60-3.47]  | rs1949733-A  | chr4  |
| 1421 | 21659360 | Wade R         | Haematologica   | Response to an   | Other | 7E-06 | 2.11  | [1.51-2.94]  | rs6785504-T  | chr3  |
| 1422 | 19680635 | Alkelai A      | Psychopharmac   | Response to an   | Other | 3E-06 | 3.21  | [1.97-5.25]  | rs12476047-C | chr2  |
| 1423 | 22142827 | Innocenti F    | Clin Cancer Res | Response to ge   | Other | 3E-08 | 3.3   | [2.10-5.10]  | rs763780-G   | chr6  |
| 1424 | 22095909 | Lange CM       | Hepatology      | Response to he   | Other | 5E-06 | 0.26  | [0.15-0.37]  | rs11242704-G | chr6  |
| 1425 | 21659334 | Tanaka Y       | Hum Mol Genet   | Response to he   | Other | 9E-25 | 33.33 | [12.50-100]  | rs11697186-A | chr20 |
| 1426 | 21659334 | Tanaka Y       | Hum Mol Genet   | Response to he   | Other | 5E-17 | 4.5   | [3.10-6.50]  | rs11697186-T | chr20 |
| 1427 | 21659334 | Tanaka Y       | Hum Mol Genet   | Response to he   | Other | 2E-25 | 25    | [11.11-50.0] | rs6139030-T  | chr20 |
| 1428 | 21659334 | Tanaka Y       | Hum Mol Genet   | Response to he   | Other | 1E-15 | 3.9   | [2.80-5.50]  | rs6139030-C  | chr20 |
| 1429 | 21228123 | Ochi H         | J Gen Virol     | Response to he   | Other | 1E-20 | 3     | [2.4-3.8]    | rs8099917-G  | chr19 |
| 1430 | 19749758 | Suppiah V      | Nat Genet       | Response to he   | Other | 9E-09 | 1.98  | [1.57-2.52]  | rs8099917-G  | chr19 |
| 1431 | 19749757 | Tanaka Y       | Nat Genet       | Response to he   | Other | 3E-32 | 27.1  | [14.6-50.3]  | rs8099917-G  | chr19 |
| 1432 | 18521091 | Volpi S        | Mol Psychiatry  | Response to ilot | Other | 3E-06 | NR    | NR           | rs17054392-C | chr4  |
| 1433 | 18521091 | Volpi S        | Mol Psychiatry  | Response to ilot | Other | 2E-06 | NR    | NR           | rs3924426-T  | chr15 |
| 1434 | 18521091 | Volpi S        | Mol Psychiatry  | Response to ilot | Other | 3E-06 | NR    | NR           | rs4799915-T  | chr18 |
| 1435 | 18521091 | Volpi S        | Mol Psychiatry  | Response to ilot | Other | 2E-06 | NR    | NR           | rs4933824-T  | chr10 |
| 1436 | 18521091 | Volpi S        | Mol Psychiatry  | Response to ilot | Other | 3E-06 | NR    | NR           | rs993648-T   | chr2  |
| 1437 | 21845381 | Florez JC      | Curr Diab Rep   | Response to me   | Other | 3E-09 | NR    | NR           | rs11212617-A | chr11 |
| 1438 | 21186350 | Zhou K         | Nat Genet       | Response to me   | Other | 3E-09 | 1.35  | [1.22-1.49]  | rs11212617-C | chr11 |
| 1439 | 20339536 | Barber MJ      | PLoS One        | Response to sta  | Other | 6E-06 | NR    | NR           | rs10221833-C | chr2  |
| 1440 | 20339536 | Barber MJ      | PLoS One        | Response to sta  | Other | 8E-06 | NR    | NR           | rs11641231-G | chr16 |
| 1441 | 20339536 | Barber MJ      | PLoS One        | Response to sta  | Other | 2E-07 | NR    | NR           | rs1431005-A  | chr4  |
| 1442 | 20339536 | Barber MJ      | PLoS One        | Response to sta  | Other | 1E-06 | NR    | NR           | rs16909449-C | chr9  |
| 1443 | 20339536 | Barber MJ      | PLoS One        | Response to sta  | Other | 3E-06 | NR    | NR           | rs174583-T   | chr11 |
| 1444 | 18650507 | Link E         | N Engl J Med    | Response to sta  | Other | 2E-09 | 4.5   | [2.60-7.70]  | rs4149056-C  | chr12 |
| 1445 | 20339536 | Barber MJ      | PLoS One        | Response to sta  | Other | 2E-08 | NR    | NR           | rs8014194-A  | chr14 |
| 1446 | 18615156 | Liu C          | Mol Med         | Response to TN   | Other | 3E-07 | NR    | NR           | rs10945919-G | chr6  |
| 1447 | 18615156 | Liu C          | Mol Med         | Response to TN   | Other | 5E-06 | NR    | NR           | rs983332-A   | chr1  |
| 1448 | 19176441 | Yang JJ        | JAMA            | Response to tre  | Other | 9E-07 | 2.73  | [1.52-4.93]  | rs1569175-T  | chr2  |
| 1449 | 19176441 | Yang JJ        | JAMA            | Response to tre  | Other | 9E-07 | 2.67  | [1.53-4.68]  | rs17007695-C | chr4  |
| 1450 | 19176441 | Yang JJ        | JAMA            | Response to tre  | Other | 7E-06 | 3.23  | [1.52-6.87]  | rs267759-A   | chr5  |
| 1451 | 19176441 | Yang JJ        | JAMA            | Response to tre  | Other | 4E-06 | 4.66  | [1.58-13.7]  | rs2901286-A  | chr10 |
| 1452 | 19176441 | Yang JJ        | JAMA            | Response to tre  | Other | 5E-06 | 7.24  | [2.46-21.30] | rs35229355-T | chr6  |
| 1453 | 19176441 | Yang JJ        | JAMA            | Response to tre  | Other | 9E-08 | 3.91  | [1.52-10.10] | rs359312-T   | chr10 |
| 1454 | 19176441 | Yang JJ        | JAMA            | Response to tre  | Other | 3E-06 | 3.01  | [1.50-6.03]  | rs4723619-C  | chr7  |
| 1455 | 19176441 | Yang JJ        | JAMA            | Response to tre  | Other | 2E-06 | 2.73  | [1.08-6.88]  | rs6125048-T  | chr20 |
| 1456 | 19176441 | Yang JJ        | JAMA            | Response to tre  | Other | 3E-06 | 13.91 | [2.72-70.92] | rs6971925-T  | chr7  |
| 1457 | 19176441 | Yang JJ        | JAMA            | Response to tre  | Other | 5E-06 | 13.9  | [2.72-71.1]  | rs7128311-C  | chr11 |
| 1458 | 20639392 | Eijgelsheim M  | Hum Mol Genet   | Resting heart ra | Other | 2E-09 | 6.2   | [4.22-8.18]  | rs174547-C   | chr11 |
| 1459 | 20639392 | Eijgelsheim M  | Hum Mol Genet   | Resting heart ra | Other | 3E-08 | 7.4   | [4.85-9.95]  | rs223116-A   | chr14 |
| 1460 | 20639392 | Eijgelsheim M  | Hum Mol Genet   | Resting heart ra | Other | 7E-08 | 5.4   | [3.48-7.32]  | rs2745967-G  | chr1  |
| 1461 | 20639392 | Eijgelsheim M  | Hum Mol Genet   | Resting heart ra | Other | 4E-10 | 6.3   | [4.36-8.24]  | rs281868-G   | chr6  |
| 1462 | 21779176 | Winkelmann J   | PLoS Genet      | Restless legs sy | Other | 1E-22 | 1.41  | [1.32-1.52]  | rs12593813-G | chr15 |
| 1463 | 17637780 | Winkelmann J   | Nat Genet       | Restless legs sy | Other | 1E-15 | 1.5   | [1.36-1.66]  | rs12593813-G | chr15 |
| 1464 | 21779176 | Winkelmann J   | PLoS Genet      | Restless legs sy | Other | 3E-10 | 1.29  | [1.19-1.40]  | rs1975197-A  | chr9  |
| 1465 | 18660810 | Schormair B    | Nat Genet       | Restless legs sy | Other | 6E-09 | 1.31  | [1.20-1.44]  | rs1975197-T  | chr9  |
| 1466 | 21779176 | Winkelmann J   | PLoS Genet      | Restless legs sy | Other | 3E-49 | 1.68  | [1.57-1.81]  | rs2300478-G  | chr2  |
| 1467 | 17637780 | Winkelmann J   | Nat Genet       | Restless legs sy | Other | 3E-28 | 1.74  | [1.57-1.92]  | rs2300478-G  | chr2  |
| 1468 | 21779176 | Winkelmann J   | PLoS Genet      | Restless legs sy | Other | 9E-19 | 1.35  | [1.27-1.43]  | rs3104767-G  | chr16 |
| 1469 | 18660810 | Schormair B    | Nat Genet       | Restless legs sy | Other | 6E-10 | 1.44  | [1.31-1.59]  | rs4626664-A  | chr9  |
| 1470 | 21779176 | Winkelmann J   | PLoS Genet      | Restless legs sy | Other | 9E-11 | 1.23  | [1.16-1.31]  | rs6747972-A  | chr2  |
| 1471 | 17637780 | Winkelmann J   | Nat Genet       | Restless legs sy | Other | 4E-18 | 1.67  | [1.49-1.89]  | rs9296249-T  | chr6  |
| 1472 | 21779176 | Winkelmann J   | PLoS Genet      | Restless legs sy | Other | 8E-22 | 1.47  | [1.35-1.47]  | rs9357271-T  | chr6  |
| 1473 | 21060863 | Ikram MK       | PLoS Genet      | Retinal vascular | Other | 4E-07 | 1     | [0.61-1.39]  | rs7824557-G  | chr8  |
| 1474 | 20453842 | Stahl EA       | Nat Genet       | Rheumatoid arth  | Other | 4E-06 | 1.11  | [NR]         | rs11203203-A | chr21 |
| 1475 | 17554300 | WTCCC          | Nature          | Rheumatoid arth  | Other | 4E-07 | 1.32  | [NR] (women) | rs11761231-C | chr7  |
| 1476 | 20453842 | Stahl EA       | Nat Genet       | Rheumatoid arth  | Other | 5E-08 | 1.29  | [NR]         | rs13315591-C | chr3  |
| 1477 | 18794853 | Raychaudhuri S | Nat Genet       | Rheumatoid arth  | Other | 9E-08 | 1.12  | [NR]         | rs1678542-C  | chr12 |
| 1478 | 19503088 | Gregersen PK   | Nat Genet       | Rheumatoid arth  | Other | 6E-09 | 1.17  | [1.11-1.23]  | rs231735-T   | chr2  |
| 1479 | 19503088 | Gregersen PK   | Nat Genet       | Rheumatoid arth  | Other | 6E-09 | 1.19  | [1.13-1.27]  | rs2736340-A  | chr8  |
| 1480 | 20453842 | Stahl EA       | Nat Genet       | Rheumatoid arth  | Other | 9E-07 | 1.1   | [NR]         | rs2872507-A  | chr17 |
| 1481 | 20453842 | Stahl EA       | Nat Genet       | Rheumatoid arth  | Other | 1E-08 | 1.15  | [1.10-1.20]  | rs3087243-G  | chr2  |
| 1482 | 20453841 | Kochi Y        | Nat Genet       | Rheumatoid arth  | Other | 8E-19 | 1.19  | [1.15-1.24]  | rs3093024-T  | chr6  |
| 1483 | 17554300 | WTCCC          | Nature          | Rheumatoid arth  | Other | 9E-06 | 1.09  | [0.96-1.25]  | rs3816587-C  | chr4  |
| 1484 | 20453842 | Stahl EA       | Nat Genet       | Rheumatoid arth  | Other | 4E-06 | 1.12  | [1.06-1.18]  | rs3890745-T  | chr1  |
| 1485 | 18794853 | Raychaudhuri S | Nat Genet       | Rheumatoid arth  | Other | 1E-07 | 1.12  | [NR]         | rs3890745-T  | chr1  |
| 1486 | 18794853 | Raychaudhuri S | Nat Genet       | Rheumatoid arth  | Other | 4E-06 | 1.11  | [NR]         | rs42041-G    | chr7  |
| 1487 | 20453842 | Stahl EA       | Nat Genet       | Rheumatoid arth  | Other | 2E-06 | 1.15  | [1.09-1.22]  | rs4750316-G  | chr10 |
| 1488 | 18794853 | Raychaudhuri S | Nat Genet       | Rheumatoid arth  | Other | 4E-06 | 1.14  | [NR]         | rs4750316-G  | chr10 |
| 1489 | 20453842 | Stahl EA       | Nat Genet       | Rheumatoid arth  | Other | 3E-09 | 1.18  | [1.11-1.25]  | rs4810485-T  | chr20 |
| 1490 | 18794853 | Raychaudhuri S | Nat Genet       | Rheumatoid arth  | Other | 8E-09 | 1.15  | [NR]         | rs4810485-G  | chr20 |
| 1491 | 17554300 | WTCCC          | Nature          | Rheumatoid arth  | Other | 5E-75 | 2.36  | [1.97-2.84]  | rs6457617-T  | chr6  |
| 1492 | 17554300 | WTCCC          | Nature          | Rheumatoid arth  | Other | 6E-25 | 1.98  | [1.72-2.27]  | rs6679677-A  | chr1  |
| 1493 | 20453842 | Stahl EA       | Nat Genet       | Rheumatoid arth  | Other | 9E-13 | 1.22  | [1.16-1.29]  | rs6920220-A  | chr6  |
| 1494 | 20453842 | Stahl EA       | Nat Genet       | Rheumatoid arth  | Other | 1E-11 | 1.14  | [NR]         | rs706778-T   | chr10 |

|      |          |                  |                   |                   |       |        |      |                 |              |       |
|------|----------|------------------|-------------------|-------------------|-------|--------|------|-----------------|--------------|-------|
| 1495 | 21653640 | Eleftherohorinou | Hum Mol Genet     | Rheumatoid arth   | Other | 2E-06  | 1.19 | [1.10-1.30]     | rs743777-G   | chr22 |
| 1496 | 17554300 | WTCCC            | Nature            | Rheumatoid arth   | Other | 1E-06  | 1.09 | [0.97-1.24]     | rs743777-G   | chr22 |
| 1497 | 21844665 | Hu HJ            | Exp Mol Med       | Rheumatoid arth   | Other | 3E-10  | 1.56 | [1.36-1.80]     | rs805297-A   | chr6  |
| 1498 | 20453842 | Stahl EA         | Nat Genet         | Rheumatoid arth   | Other | 1E-16  | 1.14 | [NR]            | rs874040-C   | chr4  |
| 1499 | 21653640 | Eleftherohorinou | Hum Mol Genet     | Rheumatoid arth   | Other | 5E-109 | 2.4  | [2.20-2.60]     | rs9268853-C  | chr6  |
| 1500 | 20453842 | Stahl EA         | Nat Genet         | Rheumatoid arth   | Other | 5E-10  | 1.13 | [NR]            | rs934734-G   | chr2  |
| 1501 | 20031603 | Marroni F        | Circ Cardiovasc   | RR interval (hea  | Other | 1E-06  | 0.15 | [0.09-0.21] un  | rs10514995-G | chr5  |
| 1502 | 20031603 | Marroni F        | Circ Cardiovasc   | RR interval (hea  | Other | 2E-06  | 0.25 | [0.15-0.35] un  | rs12552736-G | chr9  |
| 1503 | 20031603 | Marroni F        | Circ Cardiovasc   | RR interval (hea  | Other | 4E-06  | 0.26 | [0.14-0.38] un  | rs13300284-A | chr9  |
| 1504 | 20031603 | Marroni F        | Circ Cardiovasc   | RR interval (hea  | Other | 3E-06  | 0.18 | [0.10-0.26] un  | rs17706439-A | chr1  |
| 1505 | 20031603 | Marroni F        | Circ Cardiovasc   | RR interval (hea  | Other | 1E-06  | 0.19 | [0.11-0.27] un  | rs2717128-G  | chr18 |
| 1506 | 20031603 | Marroni F        | Circ Cardiovasc   | RR interval (hea  | Other | 2E-06  | 0.16 | [0.10-0.22] un  | rs3743200-A  | chr15 |
| 1507 | 20031603 | Marroni F        | Circ Cardiovasc   | RR interval (hea  | Other | 2E-06  | 0.18 | [0.10-0.26] un  | rs4132509-A  | chr1  |
| 1508 | 20031603 | Marroni F        | Circ Cardiovasc   | RR interval (hea  | Other | 4E-08  | 0.17 | [0.11-0.23] un  | rs885389-A   | chr12 |
| 1509 | 22037555 | Shi Y            | Nat Genet         | Schizophrenia     | Other | 1E-08  | 1.23 | [1.15-1.32]     | rs10489202-A | chr1  |
| 1510 | 18332876 | Kirov G          | Mol Psychiatry    | Schizophrenia     | Other | 1E-06  | NR   | NR              | rs11064768-A | chr12 |
| 1511 | 21926974 | Ripke S          | Nat Genet         | Schizophrenia     | Other | 3E-08  | 1.2  | [1.13-1.26]     | rs11191580-T | chr10 |
| 1512 | 19571808 | Stefansson H     | Nature            | Schizophrenia     | Other | 2E-09  | 1.15 | [NR]            | rs12807809-T | chr11 |
| 1513 | 18677311 | O'Donovan MC     | Nat Genet         | Schizophrenia     | Other | 2E-07  | 1.12 | [NR]            | rs1344706-T  | chr2  |
| 1514 | 19571808 | Stefansson H     | Nature            | Schizophrenia     | Other | 1E-06  | 1.09 | [NR]            | rs1502844-C  | chr5  |
| 1515 | 18677311 | O'Donovan MC     | Nat Genet         | Schizophrenia     | Other | 3E-06  | 1.16 | [NR]            | rs1602565-C  | chr11 |
| 1516 | 19571811 | Purcell SM       | Nature            | Schizophrenia     | Other | 1E-07  | 1.44 |                 | rs17594526-T | chr18 |
| 1517 | 20185149 | Athanasias L     | J Psychiatr Res   | Schizophrenia     | Other | 3E-06  | 1.13 | [NR]            | rs433598-T   | chr16 |
| 1518 | 21682944 | Alkelai A        | Int J Neuropsych  | Schizophrenia     | Other | 1E-07  | NR   | NR              | rs4803480-A  | chr19 |
| 1519 | 19571811 | Purcell SM       | Nature            | Schizophrenia     | Other | 1E-07  | 1.1  |                 | rs6782299-T  | chr3  |
| 1520 | 18677311 | O'Donovan MC     | Nat Genet         | Schizophrenia     | Other | 6E-06  | 1.12 | [NR]            | rs7192086-T  | chr16 |
| 1521 | 18282107 | Shifman S        | PLoS Genet        | Schizophrenia     | Other | 9E-07  | 1.58 | [1.31-1.89]     | rs7341475-G  | chr7  |
| 1522 | 19571809 | Shi J            | Nature            | Schizophrenia     | Other | 7E-08  | 1.14 | [NR]            | rs9272219-G  | chr6  |
| 1523 | 20713499 | Huang J          | Am J Psychiatry   | Schizophrenia,    | Other | 2E-06  | NR   | NR              | rs1001021-A  | chr22 |
| 1524 | 20713499 | Huang J          | Am J Psychiatry   | Schizophrenia,    | Other | 4E-06  | NR   | NR              | rs4982029-A  | chr14 |
| 1525 | 20713499 | Huang J          | Am J Psychiatry   | Schizophrenia,    | Other | 4E-08  | NR   | NR              | rs6484218-A  | chr11 |
| 1526 | 20713499 | Huang J          | Am J Psychiatry   | Schizophrenia,    | Other | 3E-06  | NR   | NR              | rs7326068-A  | chr13 |
| 1527 | 20707712 | Mosing MA        | Twin Res Hum G    | Self-rated health | Other | 4E-06  | 0.02 | [NR] unit decre | rs2357266-G  | chr2  |
| 1528 | 20705733 | O'Seaghdha CM    | Hum Mol Genet     | Serum calcium     | Other | 6E-06  | 0.02 | [NR] unit decre | rs6091737-T  | chr20 |
| 1529 | 20705733 | O'Seaghdha CM    | Hum Mol Genet     | Serum calcium     | Other | 8E-06  | 0.02 | [NR] unit decre | rs9831754-T  | chr3  |
| 1530 | 20383145 | Chambers JC      | Nat Genet         | Serum creatinin   | Other | 7E-10  | 1.1  | [0.8-1.4] % inc | rs3127573-G  | chr6  |
| 1531 | 20383145 | Chambers JC      | Nat Genet         | Serum creatinin   | Other | 3E-10  | 0.8  | [0.6-1.0] % inc | rs8068318-G  | chr17 |
| 1532 | 21533175 | Zhai G           | PLoS Genet        | Serum dehydro     | Other | 2E-11  | 0.11 | [0.07-0.15] un  | rs17277546-A | chr7  |
| 1533 | 21533175 | Zhai G           | PLoS Genet        | Serum dehydro     | Other | 5E-11  | 0.05 | [0.03-0.07] u n | rs7181230-G  | chr15 |
| 1534 | 22075330 | Granada M        | J Allergy Clin Im | Serum IgE level   | Other | 1E-07  | 0.05 | [NR] unit incre | rs1801275-G  | chr16 |
| 1535 | 22075330 | Granada M        | J Allergy Clin Im | Serum IgE level   | Other | 3E-18  | 0.08 | [NR] unit incre | rs20541-A    | chr5  |
| 1536 | 22075330 | Granada M        | J Allergy Clin Im | Serum IgE level   | Other | 2E-06  | 0.04 | [NR] unit decre | rs9290877-C  | chr3  |
| 1537 | 20700443 | Meyer TE         | PLoS Genet        | Serum magnes      | Other | 1E-08  | 0    | [0.002-0.006]   | rs448378-G   | chr3  |
| 1538 | 19084217 | Benjamin B       | Am J Hum Gene     | Serum markers     | Other | 1E-09  | 0.43 | [NR] s.d. incre | rs1830084-A  | chr3  |
| 1539 | 20031604 | Cheng YC         | Circ Cardiovasc   | Serum matrix m    | Other | 9E-29  | 0.39 | [NR] unit incre | rs11225434-C | chr11 |
| 1540 | 20031604 | Cheng YC         | Circ Cardiovasc   | Serum matrix m    | Other | 6E-34  | 0.44 | [NR] unit decre | rs495366-A   | chr11 |
| 1541 | 21909109 | Kim YJ           | Nat Genet         | Serum metaboli    | Other | 1E-16  | 0.04 | [0.034-0.055]   | rs10830962-C | chr11 |
| 1542 | 21909109 | Kim YJ           | Nat Genet         | Serum metaboli    | Other | 8E-22  | 0    | [0.0035-0.005]  | rs11066280-A | chr12 |
| 1543 | 21909109 | Kim YJ           | Nat Genet         | Serum metaboli    | Other | 3E-63  | 0    | [0.0014-0.001]  | rs11066280-A | chr12 |
| 1544 | 21909109 | Kim YJ           | Nat Genet         | Serum metaboli    | Other | 2E-18  | 0    | [0.0031-0.004]  | rs12483959-A | chr22 |
| 1545 | 21909109 | Kim YJ           | Nat Genet         | Serum metaboli    | Other | 2E-39  | 0    | [0.00080-0.00   | rs12483959-A | chr22 |
| 1546 | 21909109 | Kim YJ           | Nat Genet         | Serum metaboli    | Other | 1E-20  | 2.71 | [2.14-3.28] mg  | rs12654264-T | chr5  |
| 1547 | 21909109 | Kim YJ           | Nat Genet         | Serum metaboli    | Other | 3E-18  | 0.02 | [0.014-0.022]   | rs13069049-T | chr3  |
| 1548 | 21909109 | Kim YJ           | Nat Genet         | Serum metaboli    | Other | 2E-15  | 0.06 | [0.042-0.069]   | rs16856247-T | chr2  |
| 1549 | 20037589 | Illig T          | Nat Genet         | Serum metaboli    | Other | 7E-179 | 36.3 | [NR] % varian   | rs174547-C   | chr11 |
| 1550 | 21909109 | Kim YJ           | Nat Genet         | Serum metaboli    | Other | 2E-19  | 0.06 | [0.049-0.075]   | rs1799884-A  | chr7  |
| 1551 | 20037589 | Illig T          | Nat Genet         | Serum metaboli    | Other | 5E-96  | 21.5 | [NR] % varian   | rs2014355-T  | chr12 |
| 1552 | 20037589 | Illig T          | Nat Genet         | Serum metaboli    | Other | 1E-63  | 14.6 | [NR] % varian   | rs211718-C   | chr1  |
| 1553 | 21909109 | Kim YJ           | Nat Genet         | Serum metaboli    | Other | 9E-13  | 0.03 | [0.021-0.037]   | rs2280401-A  | chr19 |
| 1554 | 20037589 | Illig T          | Nat Genet         | Serum metaboli    | Other | 3E-60  | 13.8 | [NR] % varian   | rs2286963-T  | chr2  |
| 1555 | 21909109 | Kim YJ           | Nat Genet         | Serum metaboli    | Other | 2E-12  | 2.95 | [2.13-3.77] mg  | rs2738446-C  | chr19 |
| 1556 | 21931564 | Nicholson G      | PLoS Genet        | Serum metaboli    | Other | 1E-06  | 1.25 | [0.80-1.70] un  | rs37369-T    | chr5  |
| 1557 | 21909109 | Kim YJ           | Nat Genet         | Serum metaboli    | Other | 3E-21  | 0.02 | [0.019-0.029]   | rs4686914-T  | chr3  |
| 1558 | 21909109 | Kim YJ           | Nat Genet         | Serum metaboli    | Other | 2E-19  | 5.23 | [4.09-6.37] mg  | rs599839-G   | chr1  |
| 1559 | 21909109 | Kim YJ           | Nat Genet         | Serum metaboli    | Other | 6E-09  | 2.28 | [1.51-3.05] mg  | rs651007-A   | chr9  |
| 1560 | 21909109 | Kim YJ           | Nat Genet         | Serum metaboli    | Other | 1E-08  | 0.01 | [0.0059-0.012]  | rs6569474-A  | chr6  |
| 1561 | 21909109 | Kim YJ           | Nat Genet         | Serum metaboli    | Other | 8E-14  | 0.01 | [0.011-0.019]   | rs7232775-C  | chr18 |
| 1562 | 21909109 | Kim YJ           | Nat Genet         | Serum metaboli    | Other | 5E-18  | 0.02 | [-0.02972-0.07  | rs780092-G   | chr2  |
| 1563 | 20037589 | Illig T          | Nat Genet         | Serum metaboli    | Other | 4E-24  | 5.6  | [NR] % varian   | rs8396-T     | chr4  |
| 1564 | 21909109 | Kim YJ           | Nat Genet         | Serum metaboli    | Other | 1E-12  | 0.04 | [0.029-0.050]   | rs895636-A   | chr2  |
| 1565 | 20558539 | Kestenbaum B     | J Am Soc Neph     | Serum phospho     | Other | 1E-27  | 0.05 | [NR] mg/dl inc  | rs1697421-A  | chr1  |
| 1566 | 20558539 | Kestenbaum B     | J Am Soc Neph     | Serum phospho     | Other | 4E-09  | 0.04 | [NR] mg/dl dec  | rs17265703-G | chr3  |
| 1567 | 20529992 | Teupser D        | Circ Cardiovasc   | Serum phytoste    | Other | 6E-25  | 14   | [NR] % decrea   | rs41360247-C | chr2  |
| 1568 | 20529992 | Teupser D        | Circ Cardiovasc   | Serum phytoste    | Other | 2E-50  | 12   | [NR] % increa   | rs4245791-C  | chr2  |
| 1569 | 20529992 | Teupser D        | Circ Cardiovasc   | Serum phytoste    | Other | 9E-13  | 8    | [NR] % increa   | rs657152-T   | chr9  |
| 1570 | 21160077 | Gudmundsson J    | Sci Transl Med    | Serum prostate    | Other | 2E-11  | 8.3  | [NR] % increa   | rs11067228-A | chr12 |

|      |          |               |                 |                   |                  |       |       |                 |              |       |
|------|----------|---------------|-----------------|-------------------|------------------|-------|-------|-----------------|--------------|-------|
| 1571 | 21160077 | Gudmundsson J | Sci Transl Med  | Serum prostate    | Other            | 3E-46 | 39.1  | [NR] % increa   | rs17632542-T | chr19 |
| 1572 | 21160077 | Gudmundsson J | Sci Transl Med  | Serum prostate    | Other            | 1E-10 | 7     | [NR] % increa   | rs401681-C   | chr5  |
| 1573 | 20884846 | Yang Q        | Circ Cardiovasc | Serum urate       | Other            | 2E-11 | 5.16  | [3.65-6.67] um  | rs1106766-T  | chr12 |
| 1574 | 20884846 | Yang Q        | Circ Cardiovasc | Serum urate       | Other            | 5E-25 | 6.21  | [5.03-7.39] um  | rs1165196-G  | chr6  |
| 1575 | 20884846 | Yang Q        | Circ Cardiovasc | Serum urate       | Other            | 1E-06 | 1.26  | [1.14-1.38]     | rs2078267-C  | chr11 |
| 1576 | 20884846 | Yang Q        | Circ Cardiovasc | Serum urate       | Other            | 2E-26 | 6.8   | [5.55-8.05] um  | rs2078267-C  | chr11 |
| 1577 | 18327256 | Doring A      | Nat Genet       | Serum urate       | Other            | 3E-70 | 0.35  | [NR] mg/dl de   | rs7442295-C  | chr4  |
| 1578 | 18179892 | Wallace C     | Am J Hum Gene   | Serum urate       | Other            | 2E-15 | 0.02  | [0.02-0.03] ml  | rs7442295-A  | chr4  |
| 1579 | 22229870 | Karns R       | Ann Hum Genet   | Serum uric acid   | Other            | 2E-06 | 17.65 | [NR] umol/L de  | rs12999373-A | chr2  |
| 1580 | 21294900 | Charles BA    | BMC Med Genet   | Serum uric acid   | Other            | 4E-06 | 0.17  | [0.10-0.24] un  | rs1982821-T  | chr3  |
| 1581 | 21294900 | Charles BA    | BMC Med Genet   | Serum uric acid   | Other            | 5E-06 | 0.13  | [0.08-0.18] un  | rs2244967-T  | chr10 |
| 1582 | 21294900 | Charles BA    | BMC Med Genet   | Serum uric acid   | Other            | 5E-06 | 0.13  | [0.08-0.18] un  | rs717615-G   | chr4  |
| 1583 | 22229870 | Karns R       | Ann Hum Genet   | Serum uric acid   | Other            | 3E-06 | 20.9  | [NR] umol/L in  | rs765787-G   | chr15 |
| 1584 | 19503597 | Kolz M        | PLoS Genet      | Serum uric acid   | Other            | 1E-09 | 0.05  | [0.035-0.068]   | rs780094-T   | chr2  |
| 1585 | 17999355 | Stokowski RP  | Am J Hum Gene   | Skin pigmentati   | Other            | 4E-10 | 4.36  | [2.64-7.20]     | rs1042602-C  | chr11 |
| 1586 | 17952075 | Sulem P       | Nat Genet       | Skin sensitivity  | Other            | 2E-06 | 1.26  | [1.11-1.43]     | rs1393350-A  | chr11 |
| 1587 | 21118971 | Wu C          | Cancer Res      | Small-cell lung c | Other            | 9E-08 | 1.83  | [1.47-2.29] (A  | rs1716274-G  | chr11 |
| 1588 | 20418890 | TGC           | Nat Genet       | Smoking behavi    | Other            | 6E-10 | 0.37  | [0.25-0.49] CF  | rs1329650-T  | chr10 |
| 1589 | 20418890 | TGC           | Nat Genet       | Smoking behavi    | Other            | 1E-08 | 0.33  | [0.22-0.44] CF  | rs3733829-G  | chr19 |
| 1590 | 20418890 | TGC           | Nat Genet       | Smoking behavi    | Other            | 2E-08 | 1.06  | [1.04-1.08]     | rs6265-C     | chr11 |
| 1591 | 20167575 | Sun Q         | Hum Mol Genet   | Soluble leptin re | Other            | 6E-13 | 7.6   | [5.64-9.56] %   | rs1751492-C  | chr1  |
| 1592 | 21801394 | Genin E       | Orphanet J Rare | Stevens-Johnson   | Other            | 2E-08 | 1.74  | [1.43-2.13]     | rs3130501-G  | chr6  |
| 1593 | 19369658 | Ikram MA      | N Engl J Med    | Stroke            | Other            | 1E-09 | 1.29  | [1.19-1.41]     | rs12425791-A | chr12 |
| 1594 | 20877300 | Perroud N     | Pharmacogenom   | Suicidal ideation | Other            | 8E-07 | 1.88  | [NR]            | rs11143230-C | chr9  |
| 1595 | 20877300 | Perroud N     | Pharmacogenom   | Suicidal ideation | Other            | 7E-06 | 2.22  | [NR]            | rs11143230-C | chr9  |
| 1596 | 21423239 | Willour VL    | Mol Psychiatry  | Suicide attempts  | Other            | 5E-08 | 1.22  | [NR]            | rs300774-A   | chr2  |
| 1597 | 19838193 | Han JW        | Nat Genet       | Systemic lupus    | Other            | 2E-09 | 1.23  | [1.15-1.33]     | rs10036748-A | chr5  |
| 1598 | 18204447 | Kozyrev SV    | Nat Genet       | Systemic lupus    | Other            | 4E-10 | 1.38  | [1.25-1.53]     | rs10516487-G | chr4  |
| 1599 | 19838193 | Han JW        | Nat Genet       | Systemic lupus    | Other            | 2E-08 | 1.2   | [1.12-1.28]     | rs1167796-G  | chr7  |
| 1600 | 21408207 | Chung SA      | PLoS Genet      | Systemic lupus    | Other            | 6E-09 | 1.58  | [1.36-1.83]     | rs12531711-G | chr7  |
| 1601 | 19838193 | Han JW        | Nat Genet       | Systemic lupus    | Other            | 1E-15 | 1.43  | [1.32-1.56]     | rs13385731-A | chr2  |
| 1602 | 19838193 | Han JW        | Nat Genet       | Systemic lupus    | Other            | 2E-11 | 1.26  | [1.18-1.35]     | rs1385374-A  | chr12 |
| 1603 | 21408207 | Chung SA      | PLoS Genet      | Systemic lupus    | Other            | 6E-28 | 2.23  | [1.94-2.57]     | rs2187668-A  | chr6  |
| 1604 | 18204098 | Hom G         | N Engl J Med    | Systemic lupus    | Other            | 3E-21 | NR    | NR              | rs2187668-A  | chr6  |
| 1605 | 21408207 | Chung SA      | PLoS Genet      | Systemic lupus    | Other            | 3E-07 | 1.38  | [1.23-1.56]     | rs2736340-T  | chr8  |
| 1606 | 18204446 | Harley JB     | Nat Genet       | Systemic lupus    | Other            | 2E-52 | 2.36  | [2.11-2.64]     | rs3131379-A  | chr6  |
| 1607 | 19838193 | Han JW        | Nat Genet       | Systemic lupus    | Other            | 8E-19 | 1.43  | [1.32-1.54]     | rs4728142-A  | chr7  |
| 1608 | 19838193 | Han JW        | Nat Genet       | Systemic lupus    | Other            | 3E-23 | 1.39  | [1.30-1.47]     | rs4917014-A  | chr7  |
| 1609 | 19838193 | Han JW        | Nat Genet       | Systemic lupus    | Other            | 5E-12 | 1.25  | [1.17-1.33]     | rs548234-G   | chr6  |
| 1610 | 18204098 | Hom G         | N Engl J Med    | Systemic lupus    | Other            | 4E-06 | NR    | NR              | rs979233-T   | chr5  |
| 1611 | 21750679 | Allanore Y    | PLoS Genet      | Systemic sclero   | Other            | 5E-09 | 1.31  | [1.15-1.43]     | rs2233287-A  | chr5  |
| 1612 | 20383147 | Radstake TR   | Nat Genet       | Systemic sclero   | Other            | 3E-09 | 1.3   | [1.19-1.41]     | rs3821236-A  | chr2  |
| 1613 | 21750679 | Allanore Y    | PLoS Genet      | Systemic sclero   | Other            | 2E-37 | 1.61  | [1.49-1.72]     | rs6457617-T  | chr6  |
| 1614 | 21909115 | Ehret GB      | Nature          | Systolic blood p  | Other            | 7E-26 | 1.1   | [NR] mmHg in    | rs11191548-T | chr10 |
| 1615 | 19430483 | Newton-Cheh C | Nat Genet       | Systolic blood p  | Other            | 7E-24 | 1.16  | [0.92-1.40] mm  | rs11191548-T | chr10 |
| 1616 | 21909115 | Ehret GB      | Nature          | Systolic blood p  | Other            | 2E-16 | 0.5   | [NR] mmHg in    | rs1173771-G  | chr5  |
| 1617 | 21909115 | Ehret GB      | Nature          | Systolic blood p  | Other            | 2E-08 | 0.34  | [NR] mmHg in    | rs1327235-G  | chr20 |
| 1618 | 21909115 | Ehret GB      | Nature          | Systolic blood p  | Other            | 6E-23 | 0.61  | [NR] mmHg in    | rs1378942-C  | chr15 |
| 1619 | 19430483 | Newton-Cheh C | Nat Genet       | Systolic blood p  | Other            | 2E-13 | 0.85  | [0.63-1.07] mm  | rs17367504-G | chr1  |
| 1620 | 19430479 | Levy D        | Nat Genet       | Systolic blood p  | Other            | 1E-07 | 0.51  | [0.31-0.71] mm  | rs448378-A   | chr3  |
| 1621 | 21909115 | Ehret GB      | Nature          | Systolic blood p  | Other            | 3E-12 | 0.62  | [NR] mmHg de    | rs7129220-G  | chr11 |
| 1622 | 19340012 | Nan H         | J Invest Dermat | Tanning           | Other            | 5E-14 | 0.22  | [0.16-0.28] inc | rs12210050-T | chr6  |
| 1623 | 19340012 | Nan H         | J Invest Dermat | Tanning           | Other            | 2E-13 | 0.19  | [0.13-0.25] inc | rs1393350-A  | chr11 |
| 1624 | 19340012 | Nan H         | J Invest Dermat | Tanning           | Other            | 7E-08 | 0.14  | [0.08-0.20] inc | rs154659-C   | chr16 |
| 1625 | 19340012 | Nan H         | J Invest Dermat | Tanning           | Other            | 9E-08 | 0.2   | [0.12-0.28] inc | rs17094273-A | chr14 |
| 1626 | 19340012 | Nan H         | J Invest Dermat | Tanning           | Other            | 4E-06 | 0.11  | [0.07-0.15] de  | rs32579-A    | chr5  |
| 1627 | 21573004 | Prescott J    | PLoS One        | Telomere length   | Other            | 2E-14 | 0.03  | [0.02-0.04] un  | rs12696304-G | chr3  |
| 1628 | 20139977 | Codd V        | Nat Genet       | Telomere length   | Other            | 4E-14 | 0.11  | [0.08-0.14] un  | rs12696304-G | chr3  |
| 1629 | 20421499 | Levy D        | Proc Natl Acad  | Telomere length   | Other            | 2E-06 | 0.05  | [0.03-0.07] kb  | rs1975174-T  | chr19 |
| 1630 | 19483682 | Kanetsky PA   | Nat Genet       | Testicular cance  | Other            | 6E-15 | 3.07  | [2.29-4.13]     | rs4474514-A  | chr12 |
| 1631 | 21551455 | Kanetsky PA   | Hum Mol Genet   | Testicular cance  | Other            | 1E-11 | 1.7   | [1.46-1.99]     | rs7040024-A  | chr9  |
| 1632 | 20543847 | Turnbull C    | Nat Genet       | Testicular germ   | Other            | 8E-15 | 1.33  | [1.18-1.50]     | rs2736100-T  | chr5  |
| 1633 | 19483681 | Rapley EA     | Nat Genet       | Testicular germ   | Other            | 1E-13 | 1.5   | [1.28-1.75]     | rs210138-G   | chr6  |
| 1634 | 19483681 | Rapley EA     | Nat Genet       | Testicular germ   | Other            | 1E-31 | 2.55  | [2.05-3.19]     | rs995030-G   | chr12 |
| 1635 | 19483681 | Rapley EA     | Nat Genet       | Testicular germ   | Other            | 3E-30 | 2.69  | [2.10-3.44]     | rs1508595-G  | chr12 |
| 1636 | 22267200 | Gudmundsson J | Nat Genet       | Thyroid cancer    | Other            | 2E-09 | 1.36  | [1.23-1.50]     | rs2439302-G  | chr8  |
| 1637 | 22267200 | Gudmundsson J | Nat Genet       | Thyroid cancer    | Other            | 1E-09 | 1.34  | [1.22-1.47]     | rs966423-C   | chr2  |
| 1638 | 21565293 | Teumer A      | Am J Hum Gene   | Thyroid volume    | Other            | 1E-14 | 1.52  | [1.37-1.69]     | rs10917468-C | chr1  |
| 1639 | 21565293 | Teumer A      | Am J Hum Gene   | Thyroid volume    | Other            | 3E-14 | 0.07  | [0.05-0.09] un  | rs12045440-T | chr1  |
| 1640 | 21565293 | Teumer A      | Am J Hum Gene   | Thyroid volume    | Other            | 2E-11 | 1.38  | [1.26-1.51]     | rs12045440-T | chr1  |
| 1641 | 21565293 | Teumer A      | Am J Hum Gene   | Thyroid volume    | Other            | 9E-15 | 0.07  | [0.05-0.09] un  | rs17767419-T | chr16 |
| 1642 | 20686565 | Teslovich TM  | Nature          | Triglycerides     | Hypertriglycerid | 2E-29 | 7.83  | [6.22-9.44] mg  | rs10401969-C | chr19 |
| 1643 | 21909109 | Kim YJ        | Nat Genet       | Triglycerides     | Hypertriglycerid | 7E-39 | 0.09  | [0.073-0.098]   | rs10503669-T | chr8  |
| 1644 | 18193043 | Willer CJ     | Nat Genet       | Triglycerides     | Hypertriglycerid | 4E-22 | 11.57 | [NR] mg/dl hig  | rs10503669-C | chr8  |
| 1645 | 19060906 | Kathiresan S  | Nat Genet       | Triglycerides     | Hypertriglycerid | 3E-07 | 0.05  | [0.01-0.09] s.d | rs10889353-C | chr1  |
| 1646 | 19074352 | Pollin TI     | Science         | Triglycerides     | Hypertriglycerid | 3E-29 | NR    | NR              | rs10892151-A | chr11 |

|      |          |               |                   |                 |                  |        |       |                 |              |       |
|------|----------|---------------|-------------------|-----------------|------------------|--------|-------|-----------------|--------------|-------|
| 1647 | 20686565 | Teslovich TM  | Nature            | Triglycerides   | Hypertriglycerid | 3E-08  | 2.13  | [1.37-2.89] mg  | rs11649653-G | chr16 |
| 1648 | 20864672 | Waterworth DM | Arterioscler Thro | Triglycerides   | Hypertriglycerid | 6E-08  | 0.04  | [0.03-0.05] un  | rs1168013-G  | chr1  |
| 1649 | 18193044 | Kathiresan S  | Nat Genet         | Triglycerides   | Hypertriglycerid | 2E-08  | 0.11  | [0.07-0.15] %   | rs12130333-T | chr1  |
| 1650 | 18193043 | Willer CJ     | Nat Genet         | Triglycerides   | Hypertriglycerid | 1E-26  | 25.82 | [NR] mg/dl hig  | rs12286037-T | chr11 |
| 1651 | 18193044 | Kathiresan S  | Nat Genet         | Triglycerides   | Hypertriglycerid | 4E-09  | 0.1   | [0.06-0.14] %   | rs16996148-T | chr19 |
| 1652 | 18193043 | Willer CJ     | Nat Genet         | Triglycerides   | Hypertriglycerid | 3E-09  | 6.1   | [NR] mg/dl hig  | rs16996148-G | chr19 |
| 1653 | 20686565 | Teslovich TM  | Nature            | Triglycerides   | Hypertriglycerid | 9E-59  | 7.91  | [6.93-8.89] mg  | rs17145738-G | chr7  |
| 1654 | 18193044 | Kathiresan S  | Nat Genet         | Triglycerides   | Hypertriglycerid | 7E-22  | 0.14  | [0.25-0.53] %   | rs17145738-T | chr7  |
| 1655 | 18193043 | Willer CJ     | Nat Genet         | Triglycerides   | Hypertriglycerid | 2E-12  | 8.21  | [NR] mg/dl hig  | rs17145738-C | chr7  |
| 1656 | 18193044 | Kathiresan S  | Nat Genet         | Triglycerides   | Hypertriglycerid | 4E-17  | 0.08  | [0.06-0.10] %   | rs17321515-G | chr8  |
| 1657 | 18193043 | Willer CJ     | Nat Genet         | Triglycerides   | Hypertriglycerid | 7E-13  | 6.42  | [NR] mg/dl hig  | rs17321515-A | chr8  |
| 1658 | 19060906 | Kathiresan S  | Nat Genet         | Triglycerides   | Hypertriglycerid | 2E-14  | 0.06  | [0.02-0.10] s.d | rs174547-C   | chr11 |
| 1659 | 20864672 | Waterworth DM | Arterioscler Thro | Triglycerides   | Hypertriglycerid | 5E-14  | 0.03  | [0.02-0.04] un  | rs174548-G   | chr11 |
| 1660 | 18193043 | Willer CJ     | Nat Genet         | Triglycerides   | Hypertriglycerid | 2E-10  | 7.12  | [NR] mg/dl hig  | rs1748195-C  | chr1  |
| 1661 | 21909109 | Kim YJ        | Nat Genet         | Triglycerides   | Hypertriglycerid | 1E-20  | 0.04  | [0.032-0.049]   | rs2001945-C  | chr8  |
| 1662 | 18193043 | Willer CJ     | Nat Genet         | Triglycerides   | Hypertriglycerid | 8E-07  | 4.25  | [NR] mg/dl hig  | rs2144300-C  | chr1  |
| 1663 | 21909109 | Kim YJ        | Nat Genet         | Triglycerides   | Hypertriglycerid | 1E-15  | 0.07  | [0.049-0.081]   | rs2286276-T  | chr7  |
| 1664 | 18193046 | Kooner JS     | Nat Genet         | Triglycerides   | Hypertriglycerid | 5E-12  | 6.6   | [3.66-9.54] %   | rs326-A      | chr8  |
| 1665 | 17463246 | Saxena R      | Science           | Triglycerides   | Other            | 3E-13  | 2.4   | % [NR] of vari  | rs4420638-G  | chr19 |
| 1666 | 20686565 | Teslovich TM  | Nature            | Triglycerides   | Hypertriglycerid | 1E-08  | 2.42  | [1.62-3.22] mg  | rs4765127-G  | chr12 |
| 1667 | 18193043 | Willer CJ     | Nat Genet         | Triglycerides   | Hypertriglycerid | 2E-08  | 3.62  | [NR] mg/dl hig  | rs4765041-C  | chr15 |
| 1668 | 20686565 | Teslovich TM  | Nature            | Triglycerides   | Hypertriglycerid | 2E-14  | 2.76  | [2.02-3.5] mg/  | rs4846914-G  | chr1  |
| 1669 | 18193044 | Kathiresan S  | Nat Genet         | Triglycerides   | Hypertriglycerid | 7E-15  | 0.08  | [0.06-0.10] %   | rs4846914-G  | chr1  |
| 1670 | 21909109 | Kim YJ        | Nat Genet         | Triglycerides   | Hypertriglycerid | 2E-86  | 0.09  | [0.079-0.096]   | rs603446-T   | chr11 |
| 1671 | 20686565 | Teslovich TM  | Nature            | Triglycerides   | Hypertriglycerid | 3E-08  | 2.22  | [1.34-3.1] mg/  | rs645040-G   | chr3  |
| 1672 | 20864672 | Waterworth DM | Arterioscler Thro | Triglycerides   | Hypertriglycerid | 2E-07  | 0.04  | [0.03-0.05] un  | rs6544366-T  | chr2  |
| 1673 | 18193044 | Kathiresan S  | Nat Genet         | Triglycerides   | Hypertriglycerid | 2E-07  | 0.08  | [0.04-0.12] %   | rs693-A      | chr2  |
| 1674 | 17463246 | Saxena R      | Science           | Triglycerides   | Other            | 7E-07  | NR    | NR              | rs693-A      | chr2  |
| 1675 | 21909109 | Kim YJ        | Nat Genet         | Triglycerides   | Hypertriglycerid | 5E-27  | 0.05  | [0.041-0.059]   | rs780092-G   | chr2  |
| 1676 | 19060911 | Aulchenko YS  | Nat Genet         | Triglycerides   | Hypertriglycerid | 3E-20  | 0.1   | [NR] s.d. decre | rs780094-G   | chr2  |
| 1677 | 18193044 | Kathiresan S  | Nat Genet         | Triglycerides   | Hypertriglycerid | 3E-14  | 0.13  | [0.09-0.17] %   | rs780094-T   | chr2  |
| 1678 | 18193043 | Willer CJ     | Nat Genet         | Triglycerides   | Hypertriglycerid | 6E-32  | 8.59  | [NR] mg/dl hig  | rs780094-T   | chr2  |
| 1679 | 20686565 | Teslovich TM  | Nature            | Triglycerides   | Hypertriglycerid | 7E-240 | 16.95 | [16.01-17.89]   | rs964184-G   | chr11 |
| 1680 | 19060906 | Kathiresan S  | Nat Genet         | Triglycerides   | Hypertriglycerid | 4E-62  | 0.3   | [0.24-0.36] s.d | rs964184-G   | chr11 |
| 1681 | 20932310 | Han MR        | BMC Neurol        | T-tau           | Other            | 1E-08  | NR    | NR              | rs1997111-T  | chr12 |
| 1682 | 20694014 | Thye T        | Nat Genet         | Tuberculosis    | Other            | 2E-06  | 1.19  | [1.10-1.30]     | rs2335704-C  | chr2  |
| 1683 | 20694014 | Thye T        | Nat Genet         | Tuberculosis    | Other            | 7E-09  | 1.19  | [1.10-1.30]     | rs4331426-G  | chr18 |
| 1684 | 20081857 | Saxena R      | Nat Genet         | Two-hour glucos | Insulin          | 1E-07  | 0.08  | [0.06-0.10] mn  | rs12243326-C | chr10 |
| 1685 | 17554300 | WTCCC         | Nature            | Type 1 diabetes | Other            | 7E-07  | 1.49  | [1.28-1.73]     | rs11052552-G | chr12 |
| 1686 | 17554300 | WTCCC         | Nature            | Type 1 diabetes | Other            | 1E-11  | 1.34  | [1.17-1.54]     | rs11171739-C | chr12 |
| 1687 | 18978792 | Cooper JD     | Nat Genet         | Type 1 diabetes | Other            | 5E-12  | 1.13  | [1.08-1.19]     | rs11755527-G | chr6  |
| 1688 | 18978792 | Cooper JD     | Nat Genet         | Type 1 diabetes | Other            | 2E-06  | NR    | NR              | rs12251307-T | chr10 |
| 1689 | 19430480 | Barrett JC    | Nat Genet         | Type 1 diabetes | Other            | 2E-07  | 1.1   | [1.03-1.17]     | rs12444268-A | chr16 |
| 1690 | 18978792 | Cooper JD     | Nat Genet         | Type 1 diabetes | Other            | 7E-13  | NR    | NR              | rs12708716-G | chr16 |
| 1691 | 17554300 | WTCCC         | Nature            | Type 1 diabetes | Other            | 5E-07  | 1.19  | [0.97-1.45]     | rs12708716-A | chr16 |
| 1692 | 17554260 | Todd JA       | Nat Genet         | Type 1 diabetes | Other            | 3E-18  | 1.23  | [1.16-1.30]     | rs12708716-A | chr16 |
| 1693 | 17554300 | WTCCC         | Nature            | Type 1 diabetes | Other            | 5E-06  | 1.3   | [1.15-1.47]     | rs17166496-G | chr5  |
| 1694 | 17554300 | WTCCC         | Nature            | Type 1 diabetes | Other            | 3E-06  | 1.26  | [1.11-1.42]     | rs17388568-A | chr4  |
| 1695 | 18978792 | Cooper JD     | Nat Genet         | Type 1 diabetes | Other            | 6E-18  | NR    | NR              | rs17696736-G | chr12 |
| 1696 | 17554300 | WTCCC         | Nature            | Type 1 diabetes | Other            | 2E-14  | 1.34  | [1.16-1.53]     | rs17696736-G | chr12 |
| 1697 | 17554260 | Todd JA       | Nat Genet         | Type 1 diabetes | Other            | 2E-16  | 1.22  | [1.15-1.28]     | rs17696736-G | chr12 |
| 1698 | 18978792 | Cooper JD     | Nat Genet         | Type 1 diabetes | Other            | 4E-06  | 1.07  | [1.01-1.13]     | rs2165738-C  | chr2  |
| 1699 | 19430480 | Barrett JC    | Nat Genet         | Type 1 diabetes | Other            | 4E-07  | 1.1   | [1.02-1.18]     | rs2269241-G  | chr1  |
| 1700 | 18978792 | Cooper JD     | Nat Genet         | Type 1 diabetes | Other            | 3E-16  | NR    | NR              | rs2292239-A  | chr12 |
| 1701 | 17554260 | Todd JA       | Nat Genet         | Type 1 diabetes | Other            | 2E-20  | 1.28  | [1.21-1.35]     | rs2292239-A  | chr12 |
| 1702 | 18978792 | Cooper JD     | Nat Genet         | Type 1 diabetes | Other            | 2E-08  | 1.11  | [1.05-1.16]     | rs229541-T   | chr22 |
| 1703 | 19966805 | Wallace C     | Nat Genet         | Type 1 diabetes | Other            | 4E-09  | 1.16  | [1.11-1.22]     | rs2304256-C  | chr19 |
| 1704 | 18978792 | Cooper JD     | Nat Genet         | Type 1 diabetes | Other            | 9E-08  | NR    | NR              | rs2542151-C  | chr18 |
| 1705 | 17554260 | Todd JA       | Nat Genet         | Type 1 diabetes | Other            | 1E-14  | 1.3   | [1.22-1.40]     | rs2542151-C  | chr18 |
| 1706 | 18978792 | Cooper JD     | Nat Genet         | Type 1 diabetes | Other            | 8E-11  | NR    | NR              | rs3087243-A  | chr2  |
| 1707 | 18978792 | Cooper JD     | Nat Genet         | Type 1 diabetes | Other            | 3E-15  | 1.16  | [1.10-1.22]     | rs3825932-T  | chr15 |
| 1708 | 18978792 | Cooper JD     | Nat Genet         | Type 1 diabetes | Other            | 3E-06  | 1.06  | [1.01-1.12]     | rs416603-T   | chr16 |
| 1709 | 19430480 | Barrett JC    | Nat Genet         | Type 1 diabetes | Other            | 2E-11  | 1.09  | [1.02-1.16]     | rs4763879-A  | chr12 |
| 1710 | 19430480 | Barrett JC    | Nat Genet         | Type 1 diabetes | Other            | 4E-09  | 1.09  | [1.02-1.16]     | rs4900384-G  | chr14 |
| 1711 | 18978792 | Cooper JD     | Nat Genet         | Type 1 diabetes | Other            | 1E-40  | NR    | NR              | rs6679677-A  | chr1  |
| 1712 | 17554300 | WTCCC         | Nature            | Type 1 diabetes | Other            | 5E-26  | 1.82  | [1.59-2.09]     | rs6679677-A  | chr1  |
| 1713 | 17554260 | Todd JA       | Nat Genet         | Type 1 diabetes | Other            | 8E-24  | 1.89  | [1.67-2.13]     | rs6679677-A  | chr1  |
| 1714 | 17554260 | Todd JA       | Nat Genet         | Type 1 diabetes | Other            | 8E-06  | 1.12  | [1.06-1.19]     | rs6897932-G  | chr5  |
| 1715 | 18978792 | Cooper JD     | Nat Genet         | Type 1 diabetes | Other            | 6E-129 | NR    | NR              | rs9272346-G  | chr6  |
| 1716 | 17554300 | WTCCC         | Nature            | Type 1 diabetes | Other            | 5E-134 | 5.49  | [4.83-6.24]     | rs9272346-G  | chr6  |
| 1717 | 19430480 | Barrett JC    | Nat Genet         | Type 1 diabetes | Other            | 4E-13  | 1.17  | [1.10-1.24]     | rs9388489-G  | chr6  |
| 1718 | 18978792 | Cooper JD     | Nat Genet         | Type 1 diabetes | Other            | 4E-09  | 1.1   | [1.03-1.18]     | rs947474-G   | chr10 |
| 1719 | 17554260 | Todd JA       | Nat Genet         | Type 1 diabetes | Other            | 5E-06  | 1.11  | [1.05-1.17]     | rs9653442-G  | chr2  |
| 1720 | 18840781 | Grant SF      | Diabetes          | Type 1 diabetes | Other            | 2E-08  | 1.16  | [1.10-1.22]     | rs9976767-C  | chr21 |
| 1721 | 21829393 | Plagnol V     | PLoS Genet        | Type 1 diabetes | Other            | 3E-08  | 1.1   | [NR]            | rs11755527-G | chr6  |
| 1722 | 21829393 | Plagnol V     | PLoS Genet        | Type 1 diabetes | Other            | 5E-14  | 1.2   | [NR]            | rs12708716-G | chr16 |

|      |          |                  |              |                    |                 |       |      |             |  |              |       |
|------|----------|------------------|--------------|--------------------|-----------------|-------|------|-------------|--|--------------|-------|
| 1723 | 21829393 | Plagnol V        | PLoS Genet   | Type 1 diabetes    | Other           | 6E-06 | 1.1  | [NR]        |  | rs17388568-A | chr4  |
| 1724 | 21829393 | Plagnol V        | PLoS Genet   | Type 1 diabetes    | Other           | 3E-27 | 1.3  | [NR]        |  | rs2292239-T  | chr12 |
| 1725 | 21829393 | Plagnol V        | PLoS Genet   | Type 1 diabetes    | Other           | 4E-13 | 1.3  | [NR]        |  | rs2542151-G  | chr18 |
| 1726 | 21829393 | Plagnol V        | PLoS Genet   | Type 1 diabetes    | Other           | 2E-06 | 1.1  | [NR]        |  | rs2872507-A  | chr17 |
| 1727 | 21829393 | Plagnol V        | PLoS Genet   | Type 1 diabetes    | Other           | 5E-10 | 1.2  | [NR]        |  | rs3024505-G  | chr1  |
| 1728 | 21829393 | Plagnol V        | PLoS Genet   | Type 1 diabetes    | Other           | 2E-17 | 1.2  | [NR]        |  | rs3087243-A  | chr2  |
| 1729 | 21829393 | Plagnol V        | PLoS Genet   | Type 1 diabetes    | Other           | 2E-06 | 1.1  | [NR]        |  | rs743777-G   | chr22 |
| 1730 | 21490949 | Sim X            | PLoS Genet   | Type 2 diabetes    | Type 2 Diabetes | 9E-06 | 1.35 | [1.18-1.54] |  | rs10460009-C | chr18 |
| 1731 | 21490949 | Sim X            | PLoS Genet   | Type 2 diabetes    | Type 2 Diabetes | 3E-08 | 1.54 | [1.32-1.80] |  | rs1048886-G  | chr6  |
| 1732 | 17463246 | Saxena R         | Science      | Type 2 diabetes    | Type 2 Diabetes | 5E-08 | 1.2  | [1.12-1.28] |  | rs10811661-T | chr9  |
| 1733 | 17463248 | Scott LJ         | Science      | Type 2 diabetes    | Type 2 Diabetes | 8E-15 | 1.2  | [1.14-1.25] |  | rs10811661-T | chr9  |
| 1734 | 17463249 | Zeggini E        | Science      | Type 2 diabetes    | Type 2 Diabetes | 5E-06 | 1.19 | [1.11-1.28] |  | rs10811661-T | chr9  |
| 1735 | 20862305 | Shu XO           | PLoS Genet   | Type 2 diabetes    | Type 2 Diabetes | 1E-08 | 1.13 | [1.08-1.18] |  | rs10906115-A | chr10 |
| 1736 | 18372903 | Zeggini E        | Nat Genet    | Type 2 diabetes    | Type 2 Diabetes | 4E-08 | 1.13 | [1.08-1.17] |  | rs10923931-T | chr1  |
| 1737 | 17463249 | Zeggini E        | Science      | Type 2 diabetes    | Type 2 Diabetes | 1E-08 | 1.16 | [1.10-1.22] |  | rs10946398-C | chr6  |
| 1738 | 19401414 | Takeuchi F       | Diabetes     | Type 2 diabetes    | Type 2 Diabetes | 7E-12 | 1.21 | [1.15-1.28] |  | rs1111875-C  | chr10 |
| 1739 | 17463246 | Saxena R         | Science      | Type 2 diabetes    | Type 2 Diabetes | 6E-10 | 1.13 | [1.08-1.17] |  | rs1111875-C  | chr10 |
| 1740 | 17463248 | Scott LJ         | Science      | Type 2 diabetes    | Type 2 Diabetes | 6E-10 | 1.13 | [1.09-1.17] |  | rs1111875-C  | chr10 |
| 1741 | 17293876 | Sladek R         | Nature       | Type 2 diabetes    | Type 2 Diabetes | 3E-06 | 1.19 | [0.82-1.56] |  | rs1111875-G  | chr10 |
| 1742 | 18372903 | Zeggini E        | Nat Genet    | Type 2 diabetes    | Type 2 Diabetes | 2E-07 | 1.08 | [1.05-1.11] |  | rs1153188-A  | chr12 |
| 1743 | 20581827 | Voight BF        | Nat Genet    | Type 2 diabetes    | Type 2 Diabetes | 2E-09 | 1.06 | [1.04-1.08] |  | rs11634397-G | chr15 |
| 1744 | 21490949 | Sim X            | PLoS Genet   | Type 2 diabetes    | Type 2 Diabetes | 4E-07 | 1.41 | [1.23-1.61] |  | rs12027542-A | chr1  |
| 1745 | 17554300 | WTCCC            | Nature       | Type 2 diabetes    | Type 2 Diabetes | 7E-06 | 2.5  | [1.53-4.09] |  | rs12304921-G | chr12 |
| 1746 | 21573907 | Parra EJ         | Diabetologia | Type 2 diabetes    | Type 2 Diabetes | 6E-10 | 1.22 | [1.15-1.30] |  | rs1333051-A  | chr9  |
| 1747 | 20862305 | Shu XO           | PLoS Genet   | Type 2 diabetes    | Type 2 Diabetes | 6E-09 | 1.15 | [1.10-1.20] |  | rs1359790-G  | chr13 |
| 1748 | 21799836 | Cui B            | PLoS One     | Type 2 diabetes    | Type 2 Diabetes | 8E-06 | 1.14 | [NR]        |  | rs1436953-G  | chr15 |
| 1749 | 20862305 | Shu XO           | PLoS Genet   | Type 2 diabetes    | Type 2 Diabetes | 7E-07 | 1.13 | [1.08-1.19] |  | rs1436955-C  | chr15 |
| 1750 | 20581827 | Voight BF        | Nat Genet    | Type 2 diabetes    | Type 2 Diabetes | 2E-09 | 1.14 | [1.09-1.19] |  | rs1470579-C  | chr3  |
| 1751 | 17554300 | WTCCC            | Nature       | Type 2 diabetes    | Type 2 Diabetes | 7E-06 | 1.28 | [1.11-1.49] |  | rs1495377-G  | chr12 |
| 1752 | 20581827 | Voight BF        | Nat Genet    | Type 2 diabetes    | Type 2 Diabetes | 4E-09 | 1.1  | [1.07-1.14] |  | rs1531343-C  | chr12 |
| 1753 | 21490949 | Sim X            | PLoS Genet   | Type 2 diabetes    | Type 2 Diabetes | 7E-06 | 1.38 | [1.20-1.59] |  | rs17045328-G | chr1  |
| 1754 | 22158537 | Cho YS           | Nat Genet    | Type 2 diabetes    | Type 2 Diabetes | 9E-07 | 1.08 | [1.05-1.12] |  | rs17797882-T | chr16 |
| 1755 | 17463246 | Saxena R         | Science      | Type 2 diabetes    | Type 2 Diabetes | 2E-06 | 1.14 | [1.08-1.20] |  | rs1801282-C  | chr3  |
| 1756 | 17463248 | Scott LJ         | Science      | Type 2 diabetes    | Type 2 Diabetes | 2E-06 | 1.14 | [1.08-1.20] |  | rs1801282-C  | chr3  |
| 1757 | 17463249 | Zeggini E        | Science      | Type 2 diabetes    | Type 2 Diabetes | 2E-06 | 1.14 | [1.08-1.20] |  | rs1801282-C  | chr3  |
| 1758 | 21874001 | Kooner JS        | Nat Genet    | Type 2 diabetes    | Type 2 Diabetes | 4E-08 | 1.08 | [1.05-1.12] |  | rs1802295-A  | chr10 |
| 1759 | 19401414 | Takeuchi F       | Diabetes     | Type 2 diabetes    | Type 2 Diabetes | 2E-29 | 1.34 | [1.27-1.41] |  | rs2383208-A  | chr9  |
| 1760 | 22238593 | Palmer ND        | PLoS One     | Type 2 diabetes    | Type 2 Diabetes | 2E-06 | 1.35 | [1.19-1.54] |  | rs2722769-C  | chr11 |
| 1761 | 21490949 | Sim X            | PLoS Genet   | Type 2 diabetes    | Type 2 Diabetes | 9E-06 | 1.81 | [1.39-2.35] |  | rs3773506-C  | chr3  |
| 1762 | 19401414 | Takeuchi F       | Diabetes     | Type 2 diabetes    | Type 2 Diabetes | 1E-06 | 1.14 | [1.08-1.21] |  | rs4402960-T  | chr3  |
| 1763 | 18372903 | Zeggini E        | Nat Genet    | Type 2 diabetes    | Type 2 Diabetes | 8E-08 | 1.17 | [1.10-1.25] |  | rs4402960-T  | chr3  |
| 1764 | 17463246 | Saxena R         | Science      | Type 2 diabetes    | Type 2 Diabetes | 2E-09 | 1.17 | [1.11-1.23] |  | rs4402960-T  | chr3  |
| 1765 | 17463248 | Scott LJ         | Science      | Type 2 diabetes    | Type 2 Diabetes | 9E-16 | 1.14 | [1.11-1.18] |  | rs4402960-T  | chr3  |
| 1766 | 17463249 | Zeggini E        | Science      | Type 2 diabetes    | Type 2 Diabetes | 9E-16 | 1.14 | [1.11-1.18] |  | rs4402960-T  | chr3  |
| 1767 | 17554300 | WTCCC            | Nature       | Type 2 diabetes    | Type 2 Diabetes | 5E-12 | 1.36 | [1.20-1.54] |  | rs4506565-T  | chr10 |
| 1768 | 18372903 | Zeggini E        | Nat Genet    | Type 2 diabetes    | Type 2 Diabetes | 1E-08 | 1.09 | [1.06-1.12] |  | rs4607103-C  | chr3  |
| 1769 | 20862305 | Shu XO           | PLoS Genet   | Type 2 diabetes    | Type 2 Diabetes | 9E-06 | 1.17 | [1.11-1.24] |  | rs5015480-C  | chr10 |
| 1770 | 20581827 | Voight BF        | Nat Genet    | Type 2 diabetes    | Type 2 Diabetes | 1E-15 | 1.18 | [1.13-1.23] |  | rs5015480-C  | chr10 |
| 1771 | 18372903 | Zeggini E        | Nat Genet    | Type 2 diabetes    | Type 2 Diabetes | 7E-08 | 1.17 | [1.11-1.24] |  | rs5015480-C  | chr10 |
| 1772 | 17463249 | Zeggini E        | Science      | Type 2 diabetes    | Type 2 Diabetes | 5E-06 | 1.13 | [1.07-1.19] |  | rs5015480-C  | chr10 |
| 1773 | 18372903 | Zeggini E        | Nat Genet    | Type 2 diabetes    | Type 2 Diabetes | 4E-07 | 1.16 | [1.09-1.23] |  | rs5215-C     | chr11 |
| 1774 | 17463249 | Zeggini E        | Science      | Type 2 diabetes    | Type 2 Diabetes | 5E-11 | 1.14 | [1.10-1.19] |  | rs5215-C     | chr11 |
| 1775 | 17463249 | Zeggini E        | Science      | Type 2 diabetes    | Type 2 Diabetes | 1E-06 | 1.13 | [1.08-1.19] |  | rs564398-T   | chr9  |
| 1776 | 22238593 | Palmer ND        | PLoS One     | Type 2 diabetes    | Type 2 Diabetes | 3E-07 | 1.18 | [1.10-1.27] |  | rs7107217-C  | chr11 |
| 1777 | 21573907 | Parra EJ         | Diabetologia | Type 2 diabetes    | Type 2 Diabetes | 2E-08 | 1.14 | [1.09-1.20] |  | rs7305618-C  | chr12 |
| 1778 | 22238593 | Palmer ND        | PLoS One     | Type 2 diabetes    | Type 2 Diabetes | 6E-06 | 1.16 | [1.09-1.25] |  | rs7542900-C  | chr1  |
| 1779 | 22238593 | Palmer ND        | PLoS One     | Type 2 diabetes    | Type 2 Diabetes | 7E-09 | 1.33 | [1.19-1.49] |  | rs7560163-C  | chr2  |
| 1780 | 17463246 | Saxena R         | Science      | Type 2 diabetes    | Type 2 Diabetes | 4E-11 | 1.12 | [1.08-1.16] |  | rs7754840-C  | chr6  |
| 1781 | 17463248 | Scott LJ         | Science      | Type 2 diabetes    | Type 2 Diabetes | 4E-11 | 1.12 | [1.08-1.16] |  | rs7754840-C  | chr6  |
| 1782 | 17460697 | Steinthorsdottir | Nat Genet    | Type 2 diabetes    | Type 2 Diabetes | 8E-09 | 1.2  | [1.13-1.27] |  | rs7756992-G  | chr6  |
| 1783 | 17463249 | Zeggini E        | Science      | Type 2 diabetes    | Type 2 Diabetes | 1E-48 | 1.37 | [1.31-1.43] |  | rs7901695-C  | chr10 |
| 1784 | 18372903 | Zeggini E        | Nat Genet    | Type 2 diabetes    | Type 2 Diabetes | 1E-09 | 1.09 | [1.06-1.12] |  | rs7961581-C  | chr12 |
| 1785 | 20581827 | Voight BF        | Nat Genet    | Type 2 diabetes    | Type 2 Diabetes | 2E-10 | 1.07 | [1.05-1.09] |  | rs8042680-A  | chr15 |
| 1786 | 18372903 | Zeggini E        | Nat Genet    | Type 2 diabetes    | Type 2 Diabetes | 7E-06 | 1.15 | [1.09-1.22] |  | rs8050136-A  | chr16 |
| 1787 | 17463248 | Scott LJ         | Science      | Type 2 diabetes    | Type 2 Diabetes | 1E-12 | 1.17 | [1.12-1.22] |  | rs8050136-A  | chr16 |
| 1788 | 17463249 | Zeggini E        | Science      | Type 2 diabetes    | Type 2 Diabetes | 7E-14 | 1.23 | [1.18-1.32] |  | rs8050136-A  | chr16 |
| 1789 | 22158537 | Cho YS           | Nat Genet    | Type 2 diabetes    | Type 2 Diabetes | 8E-11 | 1.09 | [1.06-1.12] |  | rs831571-C   | chr3  |
| 1790 | 18372903 | Zeggini E        | Nat Genet    | Type 2 diabetes    | Type 2 Diabetes | 5E-14 | 1.1  | [1.07-1.13] |  | rs864745-T   | chr7  |
| 1791 | 17554300 | WTCCC            | Nature       | Type 2 diabetes    | Type 2 Diabetes | 3E-07 | 1.18 | [1.04-1.34] |  | rs9465871-C  | chr6  |
| 1792 | 18372903 | Zeggini E        | Nat Genet    | Type 2 diabetes    | Type 2 Diabetes | 4E-06 | 1.06 | [1.04-1.09] |  | rs9472138-T  | chr6  |
| 1793 | 17554300 | WTCCC            | Nature       | Type 2 diabetes    | Type 2 Diabetes | 2E-07 | 1.34 | [1.17-1.52] |  | rs9939609-A  | chr16 |
| 1794 | 21297633 | Anderson CA      | Nat Genet    | Ulcerative colitis | Other           | 5E-28 | 1.74 | [1.57-1.92] |  | rs11209026-G | chr1  |
| 1795 | 20228799 | McGovern DP      | Nat Genet    | Ulcerative colitis | Other           | 2E-07 | 1.27 | [NR]        |  | rs11584383-T | chr1  |
| 1796 | 21297633 | Anderson CA      | Nat Genet    | Ulcerative colitis | Other           | 1E-10 | 1.07 | [1.03-1.11] |  | rs11676348-T | chr2  |
| 1797 | 21297633 | Anderson CA      | Nat Genet    | Ulcerative colitis | Other           | 3E-08 | 1.15 | [1.09-1.21] |  | rs11739663-T | chr5  |
| 1798 | 20228799 | McGovern DP      | Nat Genet    | Ulcerative colitis | Other           | 2E-10 | 1.17 | [NR]        |  | rs1317209-T  | chr1  |



|      |          |                |                     |                         |         |        |      |                   |              |       |
|------|----------|----------------|---------------------|-------------------------|---------|--------|------|-------------------|--------------|-------|
| 1799 | 19915572 | Barrett JC     | Nat Genet           | Ulcerative colitis      | Other   | 3E-08  | 1.17 | [1.07-1.27]       | rs1728785-G  | chr16 |
| 1800 | 21297633 | Anderson CA    | Nat Genet           | Ulcerative colitis      | Other   | 9E-07  | 1.12 | [1.07-1.17]       | rs17388568-A | chr4  |
| 1801 | 20228799 | McGovern DP    | Nat Genet           | Ulcerative colitis      | Other   | 1E-13  | 1.27 | [NR]              | rs2201841-A  | chr1  |
| 1802 | 21297633 | Anderson CA    | Nat Genet           | Ulcerative colitis      | Other   | 2E-10  | 1.09 | [1.04-1.15]       | rs2297441-A  | chr20 |
| 1803 | 21297633 | Anderson CA    | Nat Genet           | Ulcerative colitis      | Other   | 3E-12  | 1.09 | [1.05-1.14]       | rs2310173-T  | chr2  |
| 1804 | 19122664 | Silverberg MS  | Nat Genet           | Ulcerative colitis      | Other   | 5E-07  | 1.54 |                   | rs2870946-G  | chr12 |
| 1805 | 21297633 | Anderson CA    | Nat Genet           | Ulcerative colitis      | Other   | 5E-11  | 1.15 | [1.10-1.19]       | rs2872507-A  | chr17 |
| 1806 | 20228798 | Franke A       | Nat Genet           | Ulcerative colitis      | Other   | 1E-12  | 1.35 | [1.22-1.50]       | rs3024493-T  | chr1  |
| 1807 | 21297633 | Anderson CA    | Nat Genet           | Ulcerative colitis      | Other   | 6E-17  | 1.25 | [1.19-1.32]       | rs3024505-A  | chr1  |
| 1808 | 20228799 | McGovern DP    | Nat Genet           | Ulcerative colitis      | Other   | 1E-08  | 1.23 | [NR]              | rs3024505-T  | chr1  |
| 1809 | 18836448 | Franke A       | Nat Genet           | Ulcerative colitis      | Other   | 1E-12  | 1.46 | [1.31-1.62]       | rs3024505-T  | chr1  |
| 1810 | 21297633 | Anderson CA    | Nat Genet           | Ulcerative colitis      | Other   | 2E-16  | 1.2  | [1.15-1.26]       | rs4510766-A  | chr7  |
| 1811 | 21297633 | Anderson CA    | Nat Genet           | Ulcerative colitis      | Other   | 2E-08  | 1.07 | [1.03-1.11]       | rs4728142-A  | chr7  |
| 1812 | 21297633 | Anderson CA    | Nat Genet           | Ulcerative colitis      | Other   | 1E-20  | 1.2  | [1.15-1.26]       | rs6017342-C  | chr20 |
| 1813 | 19915572 | Barrett JC     | Nat Genet           | Ulcerative colitis      | Other   | 9E-17  | 1.17 | [1.09-1.26]       | rs6017342-C  | chr20 |
| 1814 | 21297633 | Anderson CA    | Nat Genet           | Ulcerative colitis      | Other   | 4E-35  | 1.3  | [1.25-1.35]       | rs6426833-A  | chr1  |
| 1815 | 20228799 | McGovern DP    | Nat Genet           | Ulcerative colitis      | Other   | 2E-21  | 1.3  | [NR]              | rs6426833-A  | chr1  |
| 1816 | 19122664 | Silverberg MS  | Nat Genet           | Ulcerative colitis      | Other   | 5E-13  | 1.37 |                   | rs6426833-G  | chr1  |
| 1817 | 21297633 | Anderson CA    | Nat Genet           | Ulcerative colitis      | Other   | 3E-09  | 1.08 | [1.04-1.12]       | rs6451493-T  | chr5  |
| 1818 | 21297633 | Anderson CA    | Nat Genet           | Ulcerative colitis      | Other   | 8E-21  | 1.21 | [1.16-1.26]       | rs6584283-T  | chr10 |
| 1819 | 20228798 | Franke A       | Nat Genet           | Ulcerative colitis      | Other   | 2E-06  | 1.22 | [1.12-1.32]       | rs6584283-T  | chr10 |
| 1820 | 21297633 | Anderson CA    | Nat Genet           | Ulcerative colitis      | Other   | 1E-08  | 1.08 | [1.03-1.13]       | rs6911490-T  | chr6  |
| 1821 | 21297633 | Anderson CA    | Nat Genet           | Ulcerative colitis      | Other   | 8E-17  | 1.14 | [1.09-1.20]       | rs6920220-A  | chr6  |
| 1822 | 21297633 | Anderson CA    | Nat Genet           | Ulcerative colitis      | Other   | 2E-13  | 1.1  | [1.05-1.16]       | rs7524102-A  | chr1  |
| 1823 | 19915572 | Barrett JC     | Nat Genet           | Ulcerative colitis      | Other   | 3E-07  | 1.1  | [1.00-1.21]       | rs7524102-A  | chr1  |
| 1824 | 21297633 | Anderson CA    | Nat Genet           | Ulcerative colitis      | Other   | 2E-14  | 1.19 | [1.14-1.24]       | rs7608910-G  | chr2  |
| 1825 | 21297633 | Anderson CA    | Nat Genet           | Ulcerative colitis      | Other   | 3E-15  | 1.13 | [1.08-1.18]       | rs798502-A   | chr7  |
| 1826 | 19915572 | Barrett JC     | Nat Genet           | Ulcerative colitis      | Other   | 3E-08  | 1.11 | [1.03-1.19]       | rs886774-G   | chr7  |
| 1827 | 19915573 | Asano K        | Nat Genet           | Ulcerative colitis      | Other   | 3E-06  | 1.82 | [1.43-2.33]       | rs9268480-G  | chr6  |
| 1828 | 21297633 | Anderson CA    | Nat Genet           | Ulcerative colitis      | Other   | 1E-55  | 1.4  | [1.34-1.47]       | rs9268853-T  | chr6  |
| 1829 | 18836448 | Franke A       | Nat Genet           | Ulcerative colitis      | Other   | 6E-18  | 1.45 | [1.33-1.58]       | rs9268877-T  | chr6  |
| 1830 | 21297633 | Anderson CA    | Nat Genet           | Ulcerative colitis      | Other   | 4E-12  | 1.12 | [1.07-1.17]       | rs941823-C   | chr13 |
| 1831 | 19915572 | Barrett JC     | Nat Genet           | Ulcerative colitis      | Other   | 3E-07  | 1.1  | [1.03-1.19]       | rs9548988-T  | chr13 |
| 1832 | 21437268 | McKay JD       | PLoS Genet          | Upper aerodigestive     | Other   | 1E-08  | 1.12 | [1.08-1.17]       | rs1494961-C  | chr4  |
| 1833 | 21437268 | McKay JD       | PLoS Genet          | Upper aerodigestive     | Other   | 9E-17  | 1.33 | [1.25-1.43]       | rs971074-G   | chr4  |
| 1834 | 20348956 | Kiemeny LA     | Nat Genet           | Urinary bladder         | Other   | 1E-11  | 1.24 | [1.17-1.32]       | rs798766-T   | chr4  |
| 1835 | 20348956 | Kiemeny LA     | Nat Genet           | Urinary bladder         | Other   | 7E-12  | 1.21 | [1.15-1.28]       | rs9642880-T  | chr8  |
| 1836 | 18794855 | Kiemeny LA     | Nat Genet           | Urinary bladder         | Other   | 9E-12  | 1.22 | [1.15-1.29]       | rs9642880-T  | chr8  |
| 1837 | 21572414 | Suhre K        | Nat Genet           | Urinary metabol         | Other   | 3E-19  | NR   | NR                | rs17279437-A | chr3  |
| 1838 | 21572414 | Suhre K        | Nat Genet           | Urinary metabol         | Other   | 2E-182 | NR   | NR                | rs37369-T    | chr5  |
| 1839 | 21572414 | Suhre K        | Nat Genet           | Urinary metabol         | Other   | 1E-28  | NR   | NR                | rs4921914-C  | chr8  |
| 1840 | 21572414 | Suhre K        | Nat Genet           | Urinary metabol         | Other   | 6E-27  | NR   | NR                | rs8101881-C  | chr19 |
| 1841 | 21572414 | Suhre K        | Nat Genet           | Urinary metabol         | Other   | 1E-46  | NR   | NR                | rs830124-A   | chr12 |
| 1842 | 21460842 | Cha PC         | Nat Genet           | Uterine fibroids        | Other   | 9E-14  | 1.47 | [1.23-1.75]       | rs7913069-A  | chr10 |
| 1843 | 21460842 | Cha PC         | Nat Genet           | Uterine fibroids        | Other   | 9E-06  | 1.15 | [1.03-1.28]       | rs991964-A   | chr2  |
| 1844 | 21980494 | Germain M      | PLoS One            | Venous thrombosis       | Other   | 2E-26  | 2.52 | [NR]              | rs1018827-A  | chr1  |
| 1845 | 21980494 | Germain M      | PLoS One            | Venous thrombosis       | Other   | 6E-11  | 1.4  | [NR]              | rs3756008-T  | chr4  |
| 1846 | 21076409 | Sotoodehnia N  | Nat Genet           | Ventricular conduction  | Other   | 1E-06  | 0.44 | [NR] ms decre     | rs11710077-T | chr3  |
| 1847 | 21076409 | Sotoodehnia N  | Nat Genet           | Ventricular conduction  | Other   | 1E-13  | 0.69 | [0.51-0.87] ms    | rs1362212-A  | chr7  |
| 1848 | 21076409 | Sotoodehnia N  | Nat Genet           | Ventricular conduction  | Other   | 8E-09  | 0.39 | [0.25-0.53] ms    | rs7562790-G  | chr2  |
| 1849 | 21076409 | Sotoodehnia N  | Nat Genet           | Ventricular conduction  | Other   | 1E-10  | 0.49 | [0.33-0.65] ms    | rs883079-C   | chr12 |
| 1850 | 21076409 | Sotoodehnia N  | Nat Genet           | Ventricular conduction  | Other   | 5E-18  | 0.59 | [0.45-0.73] ms    | rs9436640-G  | chr1  |
| 1851 | 21076409 | Sotoodehnia N  | Nat Genet           | Ventricular conduction  | Other   | 1E-08  | 0.39 | [0.25-0.53] ms    | rs9912468-G  | chr17 |
| 1852 | 20548946 | Ramdas WD      | PLoS Genet          | Vertical cup-disk ratio | Other   | 1E-11  | 0.01 | [0.008-0.016]     | rs10483727-T | chr14 |
| 1853 | 20548946 | Ramdas WD      | PLoS Genet          | Vertical cup-disk ratio | Other   | 6E-08  | 0.01 | [0.007-0.015]     | rs12025126-C | chr1  |
| 1854 | 20548946 | Ramdas WD      | PLoS Genet          | Vertical cup-disk ratio | Other   | 4E-09  | 0.01 | [0.01-0.02] ms    | rs17146964-G | chr11 |
| 1855 | 20548946 | Ramdas WD      | PLoS Genet          | Vertical cup-disk ratio | Other   | 2E-08  | 0.01 | [0.009-0.017]     | rs1900004-T  | chr10 |
| 1856 | 21729881 | Major JM       | Hum Mol Genet       | Vitamin E levels        | Other   | 8E-12  | 0.04 | [0.02-0.06] unit  | rs964184-G   | chr11 |
| 1857 | 20410501 | Jin Y          | N Engl J Med        | Vitiligo                | Other   | 1E-09  | 1.27 | [1.18-1.38]       | rs11203203-A | chr21 |
| 1858 | 20410501 | Jin Y          | N Engl J Med        | Vitiligo                | Other   | 2E-18  | 1.53 | [1.39-1.68]       | rs1393350-G  | chr11 |
| 1859 | 20526339 | Quan C         | Nat Genet           | Vitiligo                | Other   | 1E-16  | 1.2  | [1.15-1.25]       | rs2236313-T  | chr6  |
| 1860 | 20410501 | Jin Y          | N Engl J Med        | Vitiligo                | Other   | 7E-19  | 1.42 | [1.32-1.54]       | rs3806156-T  | chr6  |
| 1861 | 21810271 | Antoni G       | BMC Med Genet       | WVF and FVIII levels    | Other   | 8E-06  | 0.2  | [0.12-0.28] IU/ml | rs12344583-G | chr9  |
| 1862 | 20966902 | Croteau-Chonka | Obesity (Silver \$) | Waist circumference     | Obesity | 7E-06  | 1.73 | [0.98-2.48] cm    | rs12594515-C | chr15 |
| 1863 | 20966902 | Croteau-Chonka | Obesity (Silver \$) | Waist circumference     | Obesity | 5E-06  | 3.91 | [2.24-5.58] cm    | rs13156607-T | chr5  |
| 1864 | 20966902 | Croteau-Chonka | Obesity (Silver \$) | Waist circumference     | Obesity | 8E-07  | 3.66 | [2.21-5.11] cm    | rs1440072-C  | chr2  |
| 1865 | 20935629 | Heid IM        | Nat Genet           | Waist-hip ratio         | Obesity | 1E-17  | 0.03 | [NR] unit incre   | rs1011731-G  | chr1  |
| 1866 | 20935629 | Heid IM        | Nat Genet           | Waist-hip ratio         | Obesity | 1E-24  | 0.04 | [NR] unit incre   | rs1055144-T  | chr7  |
| 1867 | 20935629 | Heid IM        | Nat Genet           | Waist-hip ratio         | Obesity | 2E-17  | 0.03 | [NR] unit incre   | rs1294421-G  | chr6  |
| 1868 | 20935629 | Heid IM        | Nat Genet           | Waist-hip ratio         | Obesity | 3E-11  | 0.03 | [NR] unit incre   | rs4823006-A  | chr22 |
| 1869 | 20935629 | Heid IM        | Nat Genet           | Waist-hip ratio         | Obesity | 4E-10  | 0.04 | [NR] unit incre   | rs6784615-T  | chr3  |
| 1870 | 20935629 | Heid IM        | Nat Genet           | Waist-hip ratio         | Obesity | 2E-16  | 0.04 | [NR] unit incre   | rs6795735-C  | chr3  |
| 1871 | 20935629 | Heid IM        | Nat Genet           | Waist-hip ratio         | Obesity | 2E-26  | 0.05 | [NR] unit incre   | rs6905288-A  | chr6  |
| 1872 | 19851299 | Johansson A    | Obesity (Silver \$) | Weight                  | Obesity | 9E-06  | 2.32 | [NR] kg increa    | rs10972341-G | chr9  |
| 1873 | 20966902 | Croteau-Chonka | Obesity (Silver \$) | Weight                  | Obesity | 4E-06  | 1.55 | [0.89-2.21] kg    | rs11108495-T | chr12 |
| 1874 | 19851299 | Johansson A    | Obesity (Silver \$) | Weight                  | Obesity | 7E-08  | 2.96 | [NR] kg decrea    | rs12517906-G | chr5  |

|      |          |                |                   |                  |         |       |      |                |              |       |
|------|----------|----------------|-------------------|------------------|---------|-------|------|----------------|--------------|-------|
| 1875 | 20966902 | Croteau-Chonka | Obesity (Silver S | Weight           | Obesity | 5E-06 | 1.71 | [0.98-2.44] kg | rs12594515-C | chr15 |
| 1876 | 20966902 | Croteau-Chonka | Obesity (Silver S | Weight           | Obesity | 1E-06 | 5.42 | [3.22-7.62] kg | rs16877106-C | chr4  |
| 1877 | 19851299 | Johansson A    | Obesity (Silver S | Weight           | Obesity | 8E-06 | 2.08 | [NR] kg increa | rs1816002-G  | chr10 |
| 1878 | 19851299 | Johansson A    | Obesity (Silver S | Weight           | Obesity | 3E-07 | 2.16 | [NR] kg increa | rs1840440-G  | chr18 |
| 1879 | 19079260 | Thorleifsson G | Nat Genet         | Weight           | Obesity | 1E-06 | 2.71 | [1.61-3.81] %  | rs1973993-C  | chr1  |
| 1880 | 19079260 | Thorleifsson G | Nat Genet         | Weight           | Obesity | 2E-07 | 4    | [2.47-5.53] %  | rs6265-G     | chr11 |
| 1881 | 19079260 | Thorleifsson G | Nat Genet         | Weight           | Obesity | 2E-07 | 3.27 | [2.05-4.49] %  | rs7138803-A  | chr12 |
| 1882 | 19079260 | Thorleifsson G | Nat Genet         | Weight           | Obesity | 3E-06 | 3.5  | [2.03-4.97] %  | rs7481311-T  | chr11 |
| 1883 | 19079260 | Thorleifsson G | Nat Genet         | Weight           | Obesity | 5E-36 | 7.05 | [5.95-8.15] %  | rs8050136-A  | chr16 |
| 1884 | 20966902 | Croteau-Chonka | Obesity (Silver S | Weight           | Obesity | 2E-06 | 1.83 | [1.08-2.58] kg | rs907121-C   | chr8  |
| 1885 | 21738478 | Okada Y        | PLoS Genet        | White blood cell | Other   | 1E-08 | 0.06 | [0.04-0.08] un | rs10147992-G | chr14 |
| 1886 | 21738478 | Okada Y        | PLoS Genet        | White blood cell | Other   | 2E-12 | 0.11 | [0.08-0.14] un | rs2516399-A  | chr6  |
| 1887 | 21738478 | Okada Y        | PLoS Genet        | White blood cell | Other   | 3E-07 | 0.06 | [0.04-0.08] un | rs546829-A   | chr4  |
| 1888 | 21738478 | Okada Y        | PLoS Genet        | White blood cell | Other   | 6E-06 | 0.05 | [0.03-0.07] un | rs6576878-G  | chr1  |
| 1889 | 21738478 | Okada Y        | PLoS Genet        | White blood cell | Other   | 2E-07 | 0.07 | [0.04-0.10] un | rs7237848-T  | chr18 |
| 1890 | 21104366 | Tan L          | Sci China Life S  | Wrist bone mas   | Other   | 5E-16 | NR   | NR             | rs11023787-T | chr11 |

tudv

pean Romani, plus a sixth category "Other" that pools all the SNPs associated to any

NonEuro, and not considered for the analysis. Also, SNPs for which the Catalog had

an excluded if they are in LD ( $r^2 > 0.8$ ) with any other associated SNP (see M&M section)

| Position  | Alleles | Non-Rom. European RAF<br>(Hapmap CEU) | Non-Rom. European RAF (from<br>B<br>GWAS paper) | Romani European RAF | Indian RAF (Hapmap GIH) | Included?<br>C | Reason for Exclusion<br>D |
|-----------|---------|---------------------------------------|-------------------------------------------------|---------------------|-------------------------|----------------|---------------------------|
| 130938530 | A/C     | 0.146                                 | NA                                              | 0.227               | 0.141                   | Yes            | -                         |
| 49303347  | A/C     | 0.248                                 | NA                                              | 0.176               | 0.182                   | Yes            | -                         |
| 55820737  | A/G     | 0.686                                 | 0.580                                           | 0.635               | 0.540                   | Yes            | -                         |
| 123462224 | A/G     | 0.248                                 | 0.230                                           | 0.306               | 0.310                   | Yes            | -                         |
| 63393583  | C/T     | 0.310                                 | 0.340                                           | 0.486               | 0.608                   | Yes            | -                         |
| 4295383   | A/G     | 0.009                                 | 0.020                                           | 0.080               | 0.131                   | Yes            | -                         |
| 76544916  | C/T     | 0.150                                 | 0.150                                           | 0.154               | 0.184                   | Yes            | -                         |
| 141211518 | A/G     | 0.000                                 | 0.010                                           | 0.028               | 0.108                   | Yes            | -                         |
| 50433798  | A/G     | 0.301                                 | 0.270                                           | 0.346               | 0.375                   | Yes            | -                         |
| 223626227 | G/T     | 0.263                                 | 0.280                                           | 0.290               | 0.142                   | Yes            | -                         |
| 2488054   | C/T     | 0.168                                 | 0.160                                           | 0.177               | 0.138                   | Yes            | -                         |
| 245756155 | C/T     | 0.129                                 | 0.180                                           | 0.150               | 0.057                   | Yes            | -                         |
| 115487041 | A/G     | 0.022                                 | 0.030                                           | 0.010               | 0.011                   | Yes            | -                         |
| 49203229  | G/T     | 0.288                                 | 0.280                                           | 0.341               | 0.295                   | Yes            | -                         |
| 34857994  | A/G     | 0.040                                 | 0.040                                           | 0.069               | 0.028                   | Yes            | -                         |
| 195111216 | A/G     | 0.344                                 | 0.320                                           | 0.396               | 0.000                   | Yes            | -                         |
| 235333226 | A/G     | 0.571                                 | 0.560                                           | 0.476               | 0.585                   | Yes            | -                         |
| 179912633 | A/T     | 0.147                                 | 0.130                                           | 0.224               | 0.000                   | Yes            | -                         |
| 107943635 | A/G     | 0.301                                 | 0.340                                           | 0.478               | 0.597                   | Yes            | -                         |
| 45059671  | C/G     | 0.088                                 | 0.900                                           | 0.250               | 0.151                   | Yes            | -                         |
| 78881467  | C/T     | 0.058                                 | 0.930                                           | 0.108               | 0.062                   | Yes            | -                         |
| 188053147 | A/G     | 0.881                                 | 0.890                                           | 0.832               | 0.841                   | Yes            | -                         |
| 140588699 | G/T     | 0.527                                 | 0.520                                           | 0.427               | 0.483                   | Yes            | -                         |
| 81208218  | A/T     | 0.465                                 | 0.470                                           | 0.359               | 0.426                   | Yes            | -                         |
| 188056399 | A/G     | 0.376                                 | 0.370                                           | 0.335               | 0.330                   | Yes            | -                         |
| 188036986 | G/T     | 0.876                                 | 0.880                                           | 0.850               | 0.767                   | Yes            | -                         |
| 217710847 | A/G     | 0.686                                 | 0.692                                           | 0.722               | 0.818                   | Yes            | -                         |
| 79857208  | A/G     | 0.723                                 | 0.680                                           | 0.727               | 0.494                   | Yes            | -                         |
| 233666752 | C/T     | 0.478                                 | 0.460                                           | 0.570               | 0.477                   | Yes            | -                         |
| 52373776  | A/C     | 0.460                                 | 0.400                                           | 0.416               | 0.261                   | No             | Duplicated                |
| 50911009  | A/G     | 0.164                                 | 0.164                                           | 0.183               | 0.284                   | No             | Duplicated                |
| 124204438 | G/T     | 0.199                                 | 0.210                                           | 0.402               | 0.364                   | Yes            | -                         |
| 124204438 | G/T     | 0.199                                 | NA                                              | 0.402               | 0.364                   | Yes            | -                         |
| 194946078 | A/C     | 0.580                                 | 0.566                                           | 0.590               | 0.455                   | Yes            | -                         |
| 56218017  | C/T     | 0.978                                 | NA                                              | 0.966               | 0.931                   | Yes            | -                         |
| 100878962 | C/T     | 0.066                                 | 0.120                                           | 0.164               | 0.091                   | Yes            | -                         |
| 57481207  | G/T     | 0.102                                 | 0.290                                           | 0.200               | 0.273                   | Yes            | -                         |
| 55351980  | C/T     | 0.321                                 | NA                                              | 0.297               | 0.199                   | Yes            | -                         |
| 56475172  | C/T     | 0.491                                 | 0.560                                           | 0.390               | 0.312                   | Yes            | -                         |
| 56475172  | C/T     | 0.491                                 | 0.550                                           | 0.390               | 0.312                   | Yes            | -                         |
| 152619870 | A/G     | 0.929                                 | 0.920                                           | 0.906               | 0.938                   | Yes            | -                         |
| 14006749  | C/T     | 0.080                                 | 0.080                                           | 0.045               | 0.136                   | Yes            | -                         |
| 101910722 | C/T     | 0.241                                 | 0.270                                           | 0.248               | 0.293                   | Yes            | -                         |
| 134977044 | C/T     | 0.137                                 | 0.170                                           | 0.247               | 0.205                   | Yes            | -                         |
| 109818005 | C/T     | 0.358                                 | 0.180                                           | 0.295               | 0.364                   | Yes            | -                         |
| 109898844 | G/T     | 0.000                                 | 0.140                                           | 0.000               | 0.000                   | Yes            | -                         |
| 135019757 | A/G     | 0.766                                 | 0.300                                           | 0.699               | 0.801                   | Yes            | -                         |
| 111893559 | A/G     | 0.000                                 | 0.110                                           | 0.000               | 0.000                   | Yes            | -                         |
| 111129784 | A/G     | 0.000                                 | 0.150                                           | 0.000               | 0.000                   | Yes            | -                         |
| 63900056  | C/G     | 0.168                                 | 0.190                                           | 0.091               | 0.148                   | Yes            | -                         |

|           |     |       |       |       |       |     |   |
|-----------|-----|-------|-------|-------|-------|-----|---|
| 69443959  | A/T | 0.181 | 0.240 | 0.278 | 0.000 | Yes | - |
| 245414812 | C/T | 0.205 | 0.030 | 0.390 | 0.398 | Yes | - |
| 173386702 | A/C | 0.518 | 0.460 | 0.321 | 0.318 | Yes | - |
| 11931598  | A/G | 0.093 | 0.090 | 0.076 | 0.205 | Yes | - |
| 216606903 | A/G | 0.274 | 0.290 | 0.324 | 0.489 | Yes | - |
| 19063517  | A/G | 0.031 | 0.020 | 0.017 | 0.028 | Yes | - |
| 41725025  | A/G | 0.549 | 0.440 | 0.490 | 0.591 | Yes | - |
| 75049350  | A/G | 0.920 | 0.070 | 0.927 | 0.807 | Yes | - |
| 121062465 | C/T | 0.562 | 0.380 | 0.542 | 0.477 | Yes | - |
| 93853746  | C/T | 0.867 | 0.190 | 0.781 | 0.642 | Yes | - |
| 91439404  | A/G | 0.739 | 0.250 | 0.591 | 0.339 | Yes | - |
| 53142608  | C/T | 0.929 | 0.070 | 0.759 | 0.767 | Yes | - |
| 115535614 | C/T | 0.765 | 0.240 | 0.617 | 0.562 | Yes | - |
| 134176278 | A/C | 0.836 | 0.160 | 0.821 | 0.915 | Yes | - |
| 25154654  | A/G | 0.514 | 0.510 | 0.388 | 0.460 | Yes | - |
| 59753183  | A/C | 0.107 | 0.150 | 0.101 | 0.379 | Yes | - |
| 116003555 | A/G | 0.219 | 0.220 | 0.274 | 0.261 | Yes | - |
| 32786977  | A/G | 0.606 | 0.590 | 0.511 | 0.693 | Yes | - |
| 146528336 | A/G | 0.540 | 0.420 | 0.579 | 0.773 | Yes | - |
| 25622328  | A/C | 0.159 | 0.170 | 0.086 | 0.256 | Yes | - |
| 2072894   | C/T | 0.721 | 0.250 | 0.714 | 0.619 | Yes | - |
| 77768798  | A/C | 0.872 | 0.700 | 0.710 | 0.682 | Yes | - |
| 47561337  | C/G | 0.275 | 0.270 | 0.287 | 0.241 | Yes | - |
| 123147464 | A/C | 0.066 | NA    | 0.074 | 0.207 | Yes | - |
| 88984673  | C/T | 0.416 | NA    | 0.270 | 0.352 | Yes | - |
| 230221774 | G/T | 0.036 | 0.040 | 0.024 | 0.080 | Yes | - |
| 2599938   | A/G | 0.093 | NA    | 0.159 | 0.415 | Yes | - |
| 55862408  | C/T | 0.522 | 0.390 | 0.436 | 0.420 | Yes | - |
| 58919763  | A/G | 0.491 | 0.310 | 0.594 | 0.375 | Yes | - |
| 238912747 | A/G | 0.465 | 0.480 | 0.489 | 0.443 | Yes | - |
| 138389159 | C/T | 0.487 | 0.420 | 0.437 | 0.403 | Yes | - |
| 62404976  | A/G | 0.288 | 0.370 | 0.462 | 0.398 | Yes | - |
| 62404976  | A/G | 0.288 | 0.400 | 0.462 | 0.398 | Yes | - |
| 67478546  | A/G | 0.959 | 0.930 | 0.950 | 0.000 | Yes | - |
| 25169771  | A/G | 0.482 | 0.470 | 0.604 | 0.528 | Yes | - |
| 109705657 | A/G | 0.487 | 0.460 | 0.441 | 0.290 | Yes | - |
| 102030060 | G/T | 0.420 | 0.450 | 0.399 | 0.392 | Yes | - |
| 39391390  | A/G | 0.496 | 0.480 | 0.455 | 0.483 | Yes | - |
| 83209349  | C/T | 0.239 | 0.280 | 0.328 | 0.159 | Yes | - |
| 43123835  | C/T | 0.496 | 0.510 | 0.409 | 0.619 | Yes | - |
| 33228215  | A/G | 0.097 | 0.077 | 0.179 | 0.148 | Yes | - |
| 20121906  | A/G | 0.186 | 0.190 | 0.086 | 0.341 | Yes | - |
| 109616599 | G/T | 0.323 | 0.440 | 0.500 | 0.364 | Yes | - |
| 110429771 | C/T | 0.717 | 0.350 | 0.650 | 0.528 | Yes | - |
| 54650588  | A/G | 0.310 | 0.230 | 0.272 | 0.176 | Yes | - |
| 35863980  | A/G | 0.584 | 0.560 | 0.579 | 0.529 | Yes | - |
| 152692888 | C/T | 0.350 | 0.370 | 0.528 | 0.278 | Yes | - |
| 35348700  | C/G | 0.496 | 0.430 | 0.389 | 0.528 | Yes | - |
| 75948331  | A/G | 0.381 | 0.340 | 0.425 | 0.216 | Yes | - |
| 65233839  | A/G | 0.451 | 0.490 | 0.500 | 0.540 | Yes | - |
| 32766057  | C/T | 0.876 | 0.630 | 0.893 | 0.722 | Yes | - |
| 20088711  | A/G | 0.137 | 0.020 | 0.073 | 0.142 | Yes | - |
| 26313673  | A/T | 0.757 | 0.290 | 0.721 | 0.676 | Yes | - |
| 35588449  | C/T | 0.292 | 0.290 | 0.328 | 0.310 | Yes | - |
| 75978964  | C/T | 0.394 | 0.360 | 0.459 | 0.256 | Yes | - |
| 153080977 | C/T | 0.336 | 0.300 | 0.323 | 0.205 | Yes | - |
| 111927736 | A/C | 0.115 | 0.120 | 0.100 | 0.136 | Yes | - |
| 71609121  | C/T | 0.181 | 0.174 | 0.217 | 0.188 | Yes | - |
| 111937516 | A/G | 0.212 | 0.260 | 0.252 | 0.318 | Yes | - |
| 71586661  | C/T | 0.164 | NA    | 0.286 | 0.290 | Yes | - |
| 111929618 | C/T | 0.115 | 0.110 | 0.101 | 0.136 | Yes | - |
| 61182216  | G/T | 0.487 | 0.390 | 0.444 | 0.291 | Yes | - |
| 181970114 | A/G | 0.389 | 0.400 | 0.497 | 0.511 | Yes | - |
| 6887167   | C/T | 0.934 | 0.050 | 0.979 | 0.955 | Yes | - |
| 234249063 | C/T | 0.465 | 0.480 | 0.541 | 0.324 | Yes | - |
| 46663178  | A/G | 0.956 | 0.030 | 0.910 | 0.915 | Yes | - |
| 57455118  | C/T | 0.354 | NA    | 0.336 | 0.222 | Yes | - |
| 32817105  | G/T | 0.133 | NA    | 0.155 | 0.102 | Yes | - |
| 112415609 | C/T | 0.248 | 0.310 | 0.372 | 0.398 | Yes | - |
| 107614226 | C/T | 0.810 | 0.840 | 0.701 | 0.841 | Yes | - |
| 94307612  | A/G | 0.128 | 0.130 | 0.099 | 0.057 | Yes | - |
| 62512948  | A/G | 0.425 | 0.400 | 0.431 | 0.415 | Yes | - |
| 3274007   | A/G | 0.509 | 0.510 | 0.483 | 0.415 | Yes | - |
| 20807173  | A/T | 0.159 | 0.170 | 0.148 | 0.142 | Yes | - |
| 53585200  | A/G | 0.845 | 0.860 | 0.917 | 0.938 | Yes | - |
| 78586361  | A/G | 0.168 | 0.190 | 0.125 | 0.178 | Yes | - |

|           |     |       |       |       |       |     |   |
|-----------|-----|-------|-------|-------|-------|-----|---|
| 101988497 | C/T | 0.664 | 0.740 | 0.776 | 0.739 | Yes | - |
| 187169435 | A/G | 0.537 | 0.590 | 0.739 | 0.000 | Yes | - |
| 26003460  | C/T | 0.628 | 0.610 | 0.692 | 0.619 | Yes | - |
| 420489    | C/T | 0.159 | 0.170 | 0.033 | 0.006 | Yes | - |
| 111725740 | C/T | 0.097 | 0.409 | 0.386 | 0.432 | Yes | - |
| 52556495  | A/C | 0.394 | 0.134 | 0.447 | 0.432 | Yes | - |
| 29356737  | G/T | 0.354 | 0.044 | 0.200 | 0.273 | Yes | - |
| 64640940  | A/G | 0.164 | 0.275 | 0.096 | 0.199 | Yes | - |
| 69352961  | C/T | 0.000 | 0.062 | 0.000 | 0.000 | Yes | - |
| 81726433  | A/C | 0.221 | 0.062 | 0.367 | 0.324 | Yes | - |
| 126212952 | A/G | 0.824 | 0.170 | 0.845 | 0.665 | Yes | - |
| 72106390  | A/G | 0.089 | 0.081 | 0.122 | 0.136 | Yes | - |
| 21222816  | C/T | 0.150 | 0.150 | 0.146 | 0.023 | Yes | - |
| 13952900  | A/G | 0.239 | 0.156 | 0.305 | 0.244 | Yes | - |
| 234337378 | G/T | 0.314 | 0.320 | 0.299 | 0.415 | Yes | - |
| 234333309 | C/T | 0.314 | 0.450 | 0.297 | 0.425 | Yes | - |
| 234333309 | C/T | 0.314 | 0.300 | 0.297 | 0.425 | Yes | - |
| 90688433  | C/T | 0.159 | 0.110 | 0.204 | 0.091 | Yes | - |
| 43309246  | A/G | 0.513 | 0.400 | 0.486 | 0.420 | Yes | - |
| 43309246  | A/G | 0.513 | 0.400 | 0.486 | 0.420 | Yes | - |
| 17316542  | C/T | 0.204 | 0.170 | 0.172 | 0.119 | Yes | - |
| 122199969 | A/G | 0.093 | 0.490 | 0.062 | 0.057 | Yes | - |
| 206091443 | C/T | 0.111 | 0.100 | 0.086 | 0.102 | Yes | - |
| 88584717  | A/G | 0.877 | 0.370 | 0.787 | 0.603 | Yes | - |
| 88584717  | A/G | 0.877 | 0.370 | 0.787 | 0.603 | Yes | - |
| 111129784 | A/G | 0.000 | 0.150 | 0.000 | 0.000 | Yes | - |
| 120820357 | C/T | 0.277 | 0.130 | 0.194 | 0.210 | Yes | - |
| 120820357 | C/T | 0.277 | 0.130 | 0.194 | 0.210 | Yes | - |
| 52378028  | A/T | 0.460 | 0.130 | 0.412 | 0.267 | Yes | - |
| 2215556   | A/G | 0.348 | 0.320 | 0.287 | 0.270 | Yes | - |
| 57188949  | C/T | 0.080 | 0.090 | 0.047 | 0.148 | Yes | - |
| 71799490  | A/G | 0.875 | NA    | 0.903 | 0.710 | Yes | - |
| 52796051  | A/G | 0.696 | 0.630 | 0.684 | 0.642 | Yes | - |
| 19222735  | A/G | 0.150 | 0.160 | 0.129 | 0.210 | Yes | - |
| 103578829 | C/T | 0.750 | 0.700 | 0.664 | 0.557 | Yes | - |
| 78761268  | A/T | 0.124 | 0.150 | 0.135 | 0.040 | Yes | - |
| 23451355  | C/T | 0.093 | 0.080 | 0.042 | 0.074 | Yes | - |
| 36773660  | G/T | 0.799 | NA    | 0.748 | 0.824 | Yes | - |
| 20795494  | A/G | 0.403 | NA    | 0.390 | 0.398 | Yes | - |
| 37609295  | A/T | 0.823 | 0.230 | 0.892 | 0.878 | Yes | - |
| 33789370  | C/T | 0.376 | 0.370 | 0.353 | 0.420 | Yes | - |
| 20828827  | C/T | 0.558 | NA    | 0.576 | 0.523 | Yes | - |
| 241164269 | C/G | 0.801 | 0.230 | 0.580 | 0.767 | Yes | - |
| 60831847  | C/G | 0.407 | NA    | 0.461 | 0.724 | Yes | - |
| 3724175   | C/T | 0.451 | 0.640 | 0.238 | 0.511 | Yes | - |
| 65612029  | C/T | 0.434 | NA    | 0.287 | 0.250 | Yes | - |
| 23541527  | A/G | 0.801 | 0.720 | 0.726 | 0.710 | Yes | - |
| 79010603  | C/T | 0.664 | NA    | 0.869 | 0.812 | Yes | - |
| 22590978  | A/G | 0.973 | NA    | 0.950 | 0.744 | Yes | - |
| 124043205 | C/T | 0.097 | 0.120 | 0.090 | 0.085 | Yes | - |
| 68267668  | A/C | 0.143 | 0.120 | 0.335 | 0.250 | Yes | - |
| 96774676  | A/G | 0.681 | NA    | 0.780 | 0.835 | Yes | - |
| 184352512 | A/G | 0.093 | 0.080 | 0.104 | 0.074 | Yes | - |
| 152833167 | A/C | 0.128 | NA    | 0.172 | 0.205 | Yes | - |
| 32550673  | C/T | 0.027 | 0.020 | 0.035 | 0.000 | Yes | - |
| 152832266 | G/T | 0.332 | NA    | 0.507 | 0.477 | Yes | - |
| 36831034  | C/T | 0.549 | NA    | 0.567 | 0.523 | Yes | - |
| 2215556   | A/G | 0.348 | 0.360 | 0.287 | 0.270 | Yes | - |
| 36773660  | G/T | 0.201 | NA    | 0.252 | 0.176 | Yes | - |
| 133722039 | A/G | 0.885 | NA    | 0.886 | 0.852 | Yes | - |
| 12486447  | A/G | 0.155 | NA    | 0.283 | 0.381 | Yes | - |
| 155741410 | G/T | 0.438 | NA    | 0.394 | 0.517 | Yes | - |
| 10701970  | G/T | 0.544 | NA    | 0.576 | 0.591 | Yes | - |
| 67437107  | C/T | 0.040 | NA    | 0.115 | 0.062 | Yes | - |
| 2007958   | A/G | 0.664 | NA    | 0.587 | 0.703 | Yes | - |
| 95365158  | C/G | 0.686 | NA    | 0.708 | 0.551 | Yes | - |
| 44443385  | C/T | 0.580 | NA    | 0.670 | 0.500 | Yes | - |
| 156874863 | A/G | 0.075 | NA    | 0.097 | 0.006 | Yes | - |
| 120399107 | A/G | 0.438 | NA    | 0.662 | 0.790 | Yes | - |
| 6031482   | C/G | 0.093 | NA    | 0.128 | 0.085 | Yes | - |
| 89788820  | C/T | 0.217 | NA    | 0.293 | 0.324 | Yes | - |
| 18222375  | C/T | 0.049 | NA    | 0.038 | 0.017 | Yes | - |
| 93174425  | A/G | 0.659 | NA    | 0.739 | 0.778 | Yes | - |
| 108430452 | A/G | 0.018 | NA    | 0.007 | 0.136 | Yes | - |
| 26476732  | G/T | 0.004 | NA    | 0.000 | 0.000 | Yes | - |
| 89221489  | C/G | 0.133 | NA    | 0.041 | 0.011 | Yes | - |

|           |     |       |         |       |       |     |                |
|-----------|-----|-------|---------|-------|-------|-----|----------------|
| 59003478  | C/T | 0.084 | NA      | 0.045 | 0.098 | Yes | -              |
| 10696942  | C/G | 0.544 | NA      | 0.576 | 0.591 | Yes | -              |
| 100506311 | A/G | 0.754 | NA      | 0.707 | 0.869 | Yes | -              |
| 10023882  | C/T | 0.769 | NA      | 0.876 | 0.801 | Yes | -              |
| 97630614  | A/G | 0.372 | NA      | 0.306 | 0.534 | Yes | -              |
| 106752487 | C/T | 0.363 | NA      | 0.462 | 0.575 | Yes | -              |
| 114517107 | A/G | 0.005 | NA      | 0.003 | 0.119 | Yes | -              |
| 100863408 | C/T | 0.131 | NA      | 0.113 | 0.000 | Yes | -              |
| 76473692  | A/T | 0.217 | NA      | 0.124 | 0.295 | Yes | -              |
| 87523211  | A/G | 0.398 | NA      | 0.493 | 0.466 | Yes | -              |
| 30204806  | C/T | 0.345 | NA      | 0.521 | 0.545 | Yes | -              |
| 105449662 | G/T | 0.336 | NA      | 0.451 | 0.409 | Yes | -              |
| 36391251  | A/G | 0.544 | NA      | 0.569 | 0.580 | Yes | -              |
| 19800503  | A/G | 0.279 | NA      | 0.355 | 0.432 | Yes | -              |
| 171646168 | A/G | 0.841 | NA      | 0.931 | 0.909 | Yes | -              |
| 1853061   | C/G | 0.332 | NA      | 0.355 | 0.426 | Yes | -              |
| 18328886  | C/T | 0.774 | NA      | 0.862 | 0.801 | Yes | -              |
| 109828579 | A/G | 0.655 | NA      | 0.810 | 0.807 | Yes | -              |
| 142428732 | A/G | 0.513 | NA      | 0.507 | 0.557 | Yes | -              |
| 194309285 | A/T | 0.775 | NA      | 0.855 | 0.949 | Yes | -              |
| 79906711  | C/T | 0.783 | NA      | 0.779 | 0.822 | Yes | -              |
| 4773585   | C/G | 0.810 | NA      | 0.828 | 0.801 | Yes | -              |
| 145679763 | A/G | 0.018 | NA      | 0.021 | 0.034 | Yes | -              |
| 145590176 | G/T | 0.022 | NA      | 0.052 | 0.097 | Yes | -              |
| 31503609  | C/T | 0.518 | NA      | 0.600 | 0.636 | Yes | -              |
| 104700560 | A/G | 0.177 | NA      | 0.179 | 0.178 | Yes | -              |
| 130841284 | G/T | 0.938 | NA      | 0.962 | 0.898 | Yes | -              |
| 25087175  | C/T | 0.248 | NA      | 0.388 | 0.352 | Yes | -              |
| 26039213  | A/G | 0.208 | NA      | 0.723 | 0.909 | Yes | -              |
| 26039213  | A/G | 0.208 | NA      | 0.723 | 0.909 | Yes | -              |
| 88283404  | A/G | 0.137 | NA      | 0.045 | 0.091 | Yes | -              |
| 1375087   | C/T | 0.566 | 0.540   | 0.701 | 0.790 | Yes | -              |
| 1704037   | C/T | 0.199 | 0.190   | 0.359 | 0.199 | Yes | -              |
| 128787250 | G/T | 0.425 | 0.450   | 0.483 | 0.642 | Yes | -              |
| 55654358  | A/G | 0.257 | 0.250   | 0.259 | 0.420 | Yes | -              |
| 87852466  | C/T | 0.146 | 0.140   | 0.042 | 0.023 | Yes | -              |
| 111302166 | A/T | 1.000 | 0.750   | 1.000 | 0.000 | Yes | -              |
| 111302166 | A/T | 1.000 | 0.750   | 1.000 | 0.000 | Yes | -              |
| 104836168 | C/T | 0.925 | 0.940   | 0.743 | 0.724 | Yes | -              |
| 104836168 | C/T | 0.925 | 0.740   | 0.743 | 0.724 | Yes | -              |
| 104836168 | C/T | 0.925 | 0.740   | 0.743 | 0.724 | Yes | -              |
| 129778440 | A/T | 0.403 | 0.380   | 0.262 | 0.250 | Yes | -              |
| 32850785  | A/G | 0.509 | 0.530   | 0.579 | 0.625 | Yes | -              |
| 32850785  | A/G | 0.509 | 0.530   | 0.579 | 0.625 | Yes | -              |
| 44757806  | C/T | 0.406 | 0.420   | 0.243 | 0.159 | Yes | -              |
| 164623454 | A/G | 0.748 | 0.200   | 0.680 | 0.727 | Yes | -              |
| 10917030  | A/G | 0.522 | 0.580   | 0.431 | 0.455 | Yes | -              |
| 72864420  | A/C | 0.321 | 0.330   | 0.608 | 0.869 | Yes | -              |
| 88584717  | A/G | 0.877 | 0.890   | 0.787 | 0.603 | Yes | -              |
| 88584717  | A/G | 0.877 | 0.890   | 0.787 | 0.603 | Yes | -              |
| 88584717  | A/G | 0.877 | 0.640   | 0.787 | 0.603 | Yes | -              |
| 88584717  | A/G | 0.877 | 0.640   | 0.787 | 0.603 | Yes | -              |
| 11785365  | A/G | 0.832 | 0.170   | 0.827 | 0.824 | Yes | -              |
| 113837114 | A/G | 0.633 | 0.660   | 0.618 | 0.619 | Yes | -              |
| 114036820 | A/G | 0.588 | 0.750   | 0.524 | 0.534 | Yes | -              |
| 114036820 | A/G | 0.588 | 0.750   | 0.524 | 0.534 | Yes | -              |
| 41852418  | C/T | 0.763 | 0.780   | 0.862 | 0.818 | Yes | -              |
| 110492139 | C/T | 0.438 | 0.590   | 0.396 | 0.131 | Yes | -              |
| 10307114  | A/G | 0.106 | 0.870   | 0.060 | 0.040 | Yes | -              |
| 157737035 | C/T | 0.690 | 0.320   | 0.600 | 0.659 | Yes | -              |
| 95885167  | C/G | 0.451 | 0.530   | 0.385 | 0.545 | Yes | -              |
| 88650694  | A/G | 0.226 | 0.270   | 0.158 | 0.114 | Yes | -              |
| 12662097  | C/T | 0.695 | 0.750   | 0.514 | 0.324 | Yes | -              |
| 110184852 | C/T | 0.327 | 0.320   | 0.390 | 0.415 | Yes | -              |
| 52373776  | A/C | 0.460 | 0.390   | 0.416 | 0.261 | Yes | -              |
| 70546020  | A/G | 0.332 | 0.280   | 0.245 | 0.176 | Yes | -              |
| 8440665   | C/T | 0.571 | 0.530   | 0.336 | 0.295 | Yes | -              |
| 39013977  | A/G | 0.690 | 0.670   | 0.671 | 0.636 | Yes | -              |
| 80139255  | A/C | 0.296 | 0.310   | 0.359 | 0.523 | Yes | -              |
| 180103425 | C/T | 0.850 | 0.850   | 0.872 | 0.153 | No  | Duplicated     |
| 223644982 | C/T | 0.058 | NonEuro | 0.077 | 0.062 | No  | Duplicated     |
| 74764232  | A/G | 0.460 | 0.430   | 0.500 | 0.420 | Yes | -              |
| 96717385  | A/C | 0.588 | 0.590   | 0.532 | 0.409 | Yes | -              |
| 56002077  | C/T | 0.265 | 0.210   | 0.196 | 0.301 | No  | LD to rs571312 |
| 56002077  | C/T | 0.265 | 0.240   | 0.196 | 0.301 | No  | Duplicated     |
| 153489789 | C/T | 0.434 | NonEuro | 0.521 | 0.500 | Yes | -              |

|           |     |       |         |       |       |     |                 |
|-----------|-----|-------|---------|-------|-------|-----|-----------------|
| 6569685   | C/T | 0.588 | 0.650   | 0.525 | 0.580 | Yes | -               |
| 129903085 | C/T | 0.748 | 0.730   | 0.735 | 0.523 | Yes | -               |
| 72585028  | A/G | 0.637 | 0.610   | 0.738 | 0.614 | Yes | -               |
| 72585028  | A/G | 0.637 | 0.620   | 0.738 | 0.614 | No  | Duplicated      |
| 47607569  | C/T | 0.412 | 0.410   | 0.379 | 0.284 | Yes | -               |
| 176156103 | A/G | 0.243 | 0.190   | 0.110 | 0.182 | Yes | -               |
| 55990749  | A/C | 0.263 | 0.240   | 0.181 | 0.300 | Yes | -               |
| 27636492  | C/T | 0.805 | 0.850   | 0.876 | 0.841 | Yes | -               |
| 624905    | C/T | 0.850 | 0.840   | 0.912 | 0.890 | Yes | -               |
| 173041038 | A/G | 0.978 | NonEuro | 0.990 | 0.983 | Yes | -               |
| 25011512  | C/T | 0.473 | 0.470   | 0.267 | 0.437 | Yes | -               |
| 48533735  | A/G | 0.345 | 0.380   | 0.356 | 0.420 | Yes | -               |
| 48533735  | A/G | 0.345 | 0.370   | 0.356 | 0.420 | No  | Duplicated      |
| 27539705  | C/T | 0.805 | 0.760   | 0.876 | 0.841 | No  | Duplicated      |
| 52373776  | A/C | 0.460 | 0.410   | 0.416 | 0.261 | No  | LD to rs9939609 |
| 128505146 | A/G | 0.237 | 0.220   | 0.133 | 0.227 | Yes | -               |
| 50911009  | A/G | 0.164 | 0.180   | 0.183 | 0.284 | Yes | -               |
| 73213292  | C/T | 0.938 | 0.910   | 0.972 | 0.932 | Yes | -               |
| 52378028  | A/T | 0.460 | 0.410   | 0.412 | 0.267 | Yes | -               |
| 52378028  | A/T | 0.460 | 0.390   | 0.412 | 0.267 | No  | Duplicated      |
| 75985270  | C/T | 0.066 | 0.120   | 0.098 | 0.131 | Yes | -               |
| 91983608  | A/G | 0.000 | 0.010   | 0.021 | 0.000 | Yes | -               |
| 67957871  | C/T | 0.140 | 0.140   | 0.087 | 0.097 | Yes | -               |
| 166291490 | C/T | 0.500 | NA      | 0.497 | 0.256 | Yes | -               |
| 22571034  | A/G | 0.186 | NA      | 0.143 | 0.188 | Yes | -               |
| 22571034  | A/G | 0.186 | NA      | 0.143 | 0.188 | Yes | -               |
| 27342428  | A/G | 0.347 | 0.320   | 0.300 | 0.000 | Yes | -               |
| 21492592  | A/G | 0.590 | NA      | 0.622 | 0.557 | Yes | -               |
| 41850145  | C/T | 0.447 | NA      | 0.354 | 0.295 | Yes | -               |
| 13576748  | C/T | 0.385 | 0.380   | 0.514 | 0.375 | Yes | -               |
| 85268161  | A/G | 0.190 | 0.190   | 0.128 | 0.114 | Yes | -               |
| 46805936  | A/G | 0.814 | 0.770   | 0.638 | 0.744 | Yes | -               |
| 151974868 | A/G | 0.451 | 0.470   | 0.466 | 0.466 | Yes | -               |
| 151974868 | A/G | 0.451 | 0.470   | 0.466 | 0.466 | Yes | -               |
| 88994267  | C/T | 0.385 | 0.340   | 0.416 | 0.290 | Yes | -               |
| 68407978  | C/T | 0.181 | 0.210   | 0.217 | 0.284 | Yes | -               |
| 15651038  | A/G | 0.217 | 0.200   | 0.181 | 0.218 | Yes | -               |
| 22571034  | A/G | 0.814 | 0.820   | 0.857 | 0.812 | Yes | -               |
| 22571034  | A/G | 0.814 | 0.820   | 0.857 | 0.812 | Yes | -               |
| 41112676  | A/G | 0.438 | 0.450   | 0.482 | 0.659 | Yes | -               |
| 41850145  | C/T | 0.447 | 0.560   | 0.354 | 0.295 | Yes | -               |
| 85268161  | A/G | 0.190 | 0.190   | 0.128 | 0.114 | Yes | -               |
| 151974868 | A/G | 0.451 | 0.470   | 0.466 | 0.466 | Yes | -               |
| 88994267  | C/T | 0.385 | 0.340   | 0.416 | 0.290 | Yes | -               |
| 52014222  | A/G | 0.332 | 0.320   | 0.261 | 0.182 | Yes | -               |
| 22571034  | A/G | 0.186 | 0.170   | 0.143 | 0.188 | Yes | -               |
| 22571034  | A/G | 0.814 | 0.820   | 0.857 | 0.812 | Yes | -               |
| 57064788  | C/T | 0.138 | 0.130   | 0.286 | 0.369 | Yes | -               |
| 63921983  | C/T | 0.562 | 0.470   | 0.309 | 0.409 | Yes | -               |
| 123336180 | A/G | 0.465 | 0.420   | 0.439 | 0.409 | Yes | -               |
| 123336180 | A/G | 0.465 | 0.400   | 0.439 | 0.409 | Yes | -               |
| 128457034 | C/T | 0.647 | 0.600   | 0.701 | 0.761 | Yes | -               |
| 128457034 | C/T | 0.647 | 0.580   | 0.701 | 0.761 | Yes | -               |
| 151990059 | A/G | 0.288 | 0.370   | 0.379 | 0.318 | Yes | -               |
| 130304391 | A/C | 0.681 | 0.450   | 0.712 | 0.511 | Yes | -               |
| 127642323 | A/G | 0.257 | 0.210   | 0.438 | 0.398 | Yes | -               |
| 5926740   | C/T | 0.518 | 0.570   | 0.521 | 0.770 | Yes | -               |
| 123342307 | A/G | 0.456 | 0.380   | 0.462 | 0.381 | Yes | -               |
| 51143842  | A/G | 0.248 | 0.300   | 0.287 | 0.267 | Yes | -               |
| 51143842  | A/G | 0.248 | 0.260   | 0.287 | 0.267 | Yes | -               |
| 51143842  | A/G | 0.248 | 0.270   | 0.287 | 0.267 | Yes | -               |
| 51143842  | A/G | 0.248 | 0.250   | 0.287 | 0.267 | Yes | -               |
| 51143842  | A/G | 0.248 | 0.270   | 0.287 | 0.267 | Yes | -               |
| 1865582   | C/T | 0.327 | 0.300   | 0.354 | 0.347 | Yes | -               |
| 69037945  | C/T | 0.185 | 0.150   | 0.178 | 0.184 | Yes | -               |
| 80511154  | C/T | 0.433 | 0.390   | 0.295 | 0.250 | Yes | -               |
| 67819680  | A/G | 0.305 | NA      | 0.259 | 0.233 | Yes | -               |
| 67819680  | A/G | 0.305 | NA      | 0.259 | 0.233 | Yes | -               |
| 71996856  | C/T | 0.871 | NA      | 0.644 | 0.534 | Yes | -               |
| 205336481 | C/T | 0.107 | NA      | 0.091 | 0.119 | Yes | -               |
| 104895835 | C/T | 0.159 | 0.130   | 0.138 | 0.244 | Yes | -               |
| 74392547  | A/G | 0.456 | 0.530   | 0.632 | 0.722 | Yes | -               |
| 110036113 | C/T | 0.018 | 0.020   | 0.010 | 0.000 | Yes | -               |
| 87836939  | C/G | 0.009 | 0.010   | 0.000 | 0.119 | Yes | -               |
| 116118870 | C/T | 0.049 | 0.070   | 0.087 | 0.029 | No  | LD to rs964184  |
| 9665474   | C/T | 0.234 | 0.210   | 0.233 | 0.148 | Yes | -               |

|           |     |       |       |       |       |     |   |
|-----------|-----|-------|-------|-------|-------|-----|---|
| 79822098  | G/T | 0.563 | 0.390 | 0.399 | 0.443 | Yes | - |
| 28177722  | A/C | 0.190 | 0.180 | 0.100 | 0.057 | Yes | - |
| 25574934  | A/G | 0.176 | 0.200 | 0.202 | 0.326 | Yes | - |
| 126111827 | A/G | 0.204 | 0.200 | 0.097 | 0.080 | Yes | - |
| 123477272 | A/G | 0.403 | 0.480 | 0.387 | 0.347 | Yes | - |
| 66851054  | A/G | 0.035 | NA    | 0.067 | 0.006 | Yes | - |
| 106196688 | A/G | 0.277 | 0.250 | 0.299 | 0.264 | Yes | - |
| 106196688 | A/G | 0.277 | 0.250 | 0.299 | 0.264 | Yes | - |
| 25880026  | A/G | 0.128 | NA    | 0.183 | 0.028 | Yes | - |
| 127886184 | C/T | 0.212 | 0.240 | 0.271 | 0.227 | Yes | - |
| 32713862  | C/T | 0.080 | 0.260 | 0.146 | 0.102 | Yes | - |
| 32713862  | C/T | 0.080 | 0.140 | 0.146 | 0.102 | Yes | - |
| 138014761 | A/G | 0.155 | 0.220 | 0.066 | 0.091 | Yes | - |
| 49733716  | C/T | 0.158 | 0.180 | 0.086 | 0.091 | Yes | - |
| 204510823 | C/T | 0.186 | 0.220 | 0.238 | 0.182 | Yes | - |
| 110492139 | C/T | 0.438 | 0.500 | 0.396 | 0.131 | Yes | - |
| 110492139 | C/T | 0.438 | 0.480 | 0.396 | 0.131 | Yes | - |
| 42709255  | A/G | 0.323 | NA    | 0.369 | 0.341 | Yes | - |
| 110492139 | C/T | 0.438 | NA    | 0.396 | 0.131 | Yes | - |
| 40007429  | A/C | 0.863 | NA    | 0.840 | 0.903 | Yes | - |
| 83626571  | A/C | 0.805 | 0.220 | 0.773 | 0.574 | Yes | - |
| 18589560  | C/T | 0.284 | 0.290 | 0.379 | 0.483 | Yes | - |
| 19268718  | C/T | 0.097 | 0.070 | 0.152 | 0.114 | Yes | - |
| 62890784  | A/C | 0.336 | 0.320 | 0.264 | 0.392 | Yes | - |
| 25641524  | A/G | 0.544 | 0.540 | 0.342 | 0.398 | Yes | - |
| 160498850 | C/T | 0.170 | 0.170 | 0.066 | 0.091 | Yes | - |
| 61353788  | C/T | 0.866 | 0.830 | 0.899 | 0.972 | Yes | - |
| 42475778  | C/T | 0.036 | 0.030 | 0.029 | 0.023 | Yes | - |
| 55277238  | A/G | 0.350 | 0.300 | 0.340 | 0.295 | Yes | - |
| 219040186 | C/T | 0.705 | 0.320 | 0.785 | 0.699 | Yes | - |
| 74686840  | A/G | 0.425 | 0.440 | 0.458 | 0.653 | Yes | - |
| 50114786  | A/G | 0.183 | 0.170 | 0.235 | 0.057 | Yes | - |
| 45421212  | C/T | 0.810 | 0.830 | 0.913 | 0.892 | Yes | - |
| 109619829 | G/T | 0.261 | 0.220 | 0.166 | 0.250 | Yes | - |
| 21085700  | A/G | 0.509 | 0.520 | 0.564 | 0.767 | Yes | - |
| 42780114  | A/G | 0.475 | 0.490 | 0.472 | 0.000 | Yes | - |
| 92782026  | A/C | 0.164 | 0.210 | 0.097 | 0.057 | Yes | - |
| 116154127 | C/G | 0.121 | 0.130 | 0.177 | 0.176 | Yes | - |
| 30595903  | G/T | 0.261 | 0.120 | 0.348 | 0.358 | Yes | - |
| 44435005  | G/T | 0.150 | 0.240 | 0.340 | 0.182 | Yes | - |
| 1146165   | C/T | 0.071 | 0.080 | 0.045 | 0.051 | Yes | - |
| 77587871  | A/G | 0.420 | 0.430 | 0.317 | 0.126 | Yes | - |
| 149218101 | C/T | 0.208 | 0.200 | 0.145 | 0.045 | Yes | - |
| 143289827 | A/C | 0.265 | 0.280 | 0.128 | 0.142 | Yes | - |
| 65263398  | C/G | 0.327 | 0.350 | 0.414 | 0.341 | Yes | - |
| 110492139 | C/T | 0.562 | 0.500 | 0.604 | 0.869 | Yes | - |
| 56811371  | C/T | 0.186 | 0.190 | 0.396 | 0.443 | Yes | - |
| 20272089  | A/G | 0.823 | 0.798 | 0.885 | 0.724 | Yes | - |
| 230799467 | G/T | 0.205 | 0.190 | 0.206 | 0.224 | Yes | - |
| 111513929 | A/G | 0.193 | 0.200 | 0.150 | 0.182 | Yes | - |
| 32686060  | C/T | 0.138 | 0.260 | 0.254 | 0.206 | Yes | - |
| 54128188  | A/G | 0.102 | NA    | 0.145 | 0.102 | Yes | - |
| 122866607 | A/G | 0.173 | 0.210 | 0.140 | 0.114 | Yes | - |
| 242019774 | C/T | 0.133 | NA    | 0.077 | 0.091 | Yes | - |
| 81051763  | A/G | 0.397 | NA    | 0.585 | 0.477 | Yes | - |
| 32714734  | A/G | 0.161 | 0.270 | 0.250 | 0.169 | Yes | - |
| 362727    | A/C | 0.469 | 0.490 | 0.406 | 0.432 | Yes | - |
| 22565405  | A/C | 0.323 | 0.480 | 0.328 | 0.358 | Yes | - |
| 151949441 | C/T | 0.336 | 0.770 | 0.447 | 0.432 | Yes | - |
| 33228215  | A/G | 0.097 | 0.101 | 0.179 | 0.148 | Yes | - |
| 72814933  | C/T | 0.248 | 0.265 | 0.083 | 0.028 | Yes | - |
| 128476625 | A/G | 0.460 | 0.500 | 0.448 | 0.489 | Yes | - |
| 117699864 | A/C | 0.894 | 0.070 | 0.934 | 0.977 | Yes | - |
| 128482487 | G/T | 0.487 | 0.340 | 0.529 | 0.506 | Yes | - |
| 128482487 | G/T | 0.487 | 0.490 | 0.529 | 0.506 | Yes | - |
| 128493974 | A/G | 0.310 | 0.180 | 0.335 | 0.364 | Yes | - |
| 150759778 | A/G | 0.288 | 0.290 | 0.247 | 0.233 | Yes | - |
| 113466972 | C/T | 0.128 | 0.160 | 0.178 | 0.131 | Yes | - |
| 39062796  | G/T | 0.205 | 0.190 | 0.121 | 0.108 | Yes | - |
| 154135249 | A/G | 0.257 | 0.230 | 0.176 | 0.227 | Yes | - |
| 93957372  | A/G | 0.263 | 0.280 | 0.203 | 0.256 | Yes | - |
| 41858501  | A/G | 0.867 | 0.860 | 0.849 | 0.722 | Yes | - |
| 48592940  | C/T | 0.442 | 0.490 | 0.388 | 0.574 | Yes | - |
| 89422694  | A/G | 0.549 | 0.600 | 0.636 | 0.733 | Yes | - |
| 73846059  | A/G | 0.093 | NA    | 0.034 | 0.205 | Yes | - |
| 226709230 | A/G | 0.305 | NA    | 0.117 | 0.210 | Yes | - |



|           |     |       |         |       |       |     |                 |
|-----------|-----|-------|---------|-------|-------|-----|-----------------|
| 67614078  | A/G | 0.296 | NA      | 0.292 | 0.188 | Yes | -               |
| 54819217  | C/T | 0.164 | 0.220   | 0.124 | 0.250 | Yes | -               |
| 22115503  | C/G | 0.456 | NA      | 0.538 | 0.483 | No  | Duplicated      |
| 181437571 | A/C | 1.000 | 0.970   | 0.996 | 0.000 | Yes | -               |
| 103313362 | C/T | 0.381 | 0.230   | 0.202 | 0.460 | Yes | -               |
| 55268627  | C/T | 0.836 | 0.820   | 0.903 | 0.955 | Yes | -               |
| 11024601  | G/T | 0.743 | 0.770   | 0.681 | 0.761 | Yes | -               |
| 129450732 | C/T | 0.615 | 0.620   | 0.720 | 0.864 | Yes | -               |
| 10953139  | A/G | 0.053 | 0.060   | 0.010 | 0.006 | Yes | -               |
| 10699486  | A/G | 0.106 | 0.110   | 0.055 | 0.085 | Yes | -               |
| 25741062  | A/G | 0.637 | 0.860   | 0.718 | 0.722 | Yes | -               |
| 134256218 | C/G | 0.597 | 0.620   | 0.583 | 0.460 | Yes | -               |
| 55515425  | A/G | 0.000 | 0.140   | 0.000 | 0.000 | Yes | -               |
| 116479139 | C/G | 0.254 | 0.680   | 0.292 | 0.477 | Yes | -               |
| 104709086 | A/G | 0.925 | 0.890   | 0.750 | 0.722 | Yes | -               |
| 13035530  | C/G | 0.633 | 0.670   | 0.631 | 0.858 | Yes | -               |
| 116186218 | A/G | 0.777 | 0.210   | 0.681 | 0.426 | Yes | -               |
| 22675664  | A/G | 0.248 | 0.050   | 0.169 | 0.142 | Yes | -               |
| 12996990  | C/T | 0.615 | NA      | 0.590 | 0.750 | No  | D to rs12526453 |
| 22115503  | C/G | 0.456 | 0.490   | 0.538 | 0.483 | No  | D to rs7865618  |
| 22115503  | C/G | 0.456 | 0.470   | 0.538 | 0.483 | No  | Duplicated      |
| 22115503  | C/G | 0.456 | 0.470   | 0.538 | 0.483 | No  | Duplicated      |
| 66522640  | A/G | 1.000 | 0.940   | 1.000 | 0.000 | Yes | -               |
| 82572034  | A/G | 0.885 | 0.910   | 0.914 | 0.892 | Yes | -               |
| 55604800  | C/T | 0.956 | 0.940   | 0.969 | 0.898 | Yes | -               |
| 71488586  | A/G | 0.743 | 0.550   | 0.583 | 0.619 | Yes | -               |
| 65245693  | C/T | 0.339 | 0.300   | 0.135 | 0.102 | Yes | -               |
| 44095830  | C/T | 0.854 | 0.870   | 0.808 | 0.699 | Yes | -               |
| 220890152 | A/C | 0.732 | 0.740   | 0.710 | 0.665 | Yes | -               |
| 220890152 | A/C | 0.732 | 0.710   | 0.710 | 0.665 | No  | Duplicated      |
| 35142778  | C/G | 0.779 | 0.750   | 0.958 | 0.915 | Yes | -               |
| 238512219 | C/T | 0.862 | 0.870   | 0.788 | 0.835 | Yes | -               |
| 76867289  | C/T | 0.571 | 0.600   | 0.631 | 0.672 | Yes | -               |
| 119919970 | G/T | 0.381 | 0.360   | 0.410 | 0.455 | Yes | -               |
| 139602642 | C/T | 0.177 | 0.180   | 0.092 | 0.074 | No  | D to rs9818870  |
| 46495753  | A/G | 0.456 | 0.490   | 0.475 | 0.460 | Yes | -               |
| 30375128  | C/T | 0.429 | 0.380   | 0.448 | 0.284 | Yes | -               |
| 226776324 | A/C | 0.655 | 0.650   | 0.684 | 0.801 | Yes | -               |
| 159566321 | C/T | 0.208 | 0.240   | 0.252 | 0.403 | Yes | -               |
| 65783002  | C/T | 0.066 | 0.440   | 0.081 | 0.148 | Yes | -               |
| 30356078  | C/G | 0.562 | NA      | 0.576 | 0.670 | Yes | -               |
| 44343596  | C/T | 0.536 | 0.530   | 0.555 | 0.534 | Yes | -               |
| 109758713 | A/G | 0.420 | 0.440   | 0.511 | 0.460 | Yes | -               |
| 11195295  | C/G | 0.916 | 0.690   | 0.931 | 0.852 | Yes | -               |
| 125787107 | A/G | 0.661 | 0.690   | 0.801 | 0.756 | Yes | -               |
| 22088574  | A/G | 0.460 | 0.460   | 0.566 | 0.477 | No  | Duplicated      |
| 22088574  | A/G | 0.460 | NA      | 0.566 | 0.477 | No  | D to rs7865618  |
| 109623689 | A/G | 0.721 | 0.780   | 0.843 | 0.750 | Yes | -               |
| 109623689 | A/G | 0.721 | 0.770   | 0.843 | 0.750 | No  | Duplicated      |
| 203454130 | C/T | 0.159 | 0.150   | 0.056 | 0.011 | Yes | -               |
| 25019635  | C/T | 0.332 | 0.310   | 0.296 | 0.074 | Yes | -               |
| 151294678 | A/G | 0.261 | 0.250   | 0.347 | 0.256 | Yes | -               |
| 11548681  | A/G | 0.535 | 0.220   | 0.654 | 0.545 | Yes | -               |
| 87502707  | C/T | 1.000 | 0.910   | 1.000 | 0.000 | Yes | -               |
| 232792635 | A/C | 0.723 | 0.720   | 0.625 | 0.767 | Yes | -               |
| 20964259  | C/T | 0.013 | 0.150   | 0.003 | 0.023 | Yes | -               |
| 15623008  | C/T | 0.469 | 0.460   | 0.535 | 0.477 | Yes | -               |
| 116855058 | G/T | 0.113 | 0.120   | 0.163 | 0.000 | Yes | -               |
| 22021005  | A/G | 0.553 | 0.590   | 0.688 | 0.676 | Yes | -               |
| 81769899  | G/T | 0.805 | 0.800   | 0.868 | 0.795 | Yes | -               |
| 55697456  | A/G | 0.376 | 0.570   | 0.472 | 0.483 | Yes | -               |
| 83952267  | A/G | 0.200 | NonEuro | 0.136 | 0.222 | Yes | -               |
| 116154127 | C/G | 0.121 | 0.130   | 0.177 | 0.176 | Yes | -               |
| 139604812 | C/T | 0.168 | 0.150   | 0.090 | 0.074 | Yes | -               |
| 102019281 | C/T | 0.513 | NA      | 0.514 | 0.449 | Yes | -               |
| 245668218 | C/T | 0.619 | NA      | 0.472 | 0.631 | Yes | -               |
| 93908973  | A/G | 0.094 | 0.100   | 0.250 | 0.312 | Yes | -               |
| 42475778  | C/T | 0.964 | NA      | 0.971 | 0.977 | Yes | -               |
| 65878532  | C/T | 0.338 | NA      | 0.435 | 0.466 | Yes | -               |
| 157945440 | C/T | 0.659 | NA      | 0.745 | 0.614 | Yes | -               |
| 58682257  | C/T | 0.625 | NA      | 0.604 | 0.636 | Yes | -               |
| 152692888 | C/T | 0.650 | NA      | 0.472 | 0.722 | Yes | -               |
| 50114786  | A/G | 0.817 | NA      | 0.766 | 0.943 | Yes | -               |
| 50114786  | A/G | 0.817 | 0.900   | 0.766 | 0.943 | Yes | -               |
| 50114786  | A/G | 0.183 | NA      | 0.235 | 0.057 | Yes | -               |
| 152685503 | C/T | 0.368 | NA      | 0.538 | 0.279 | Yes | -               |

|           |     |       |         |       |       |     |            |
|-----------|-----|-------|---------|-------|-------|-----|------------|
| 131867517 | A/G | 0.217 | NA      | 0.438 | 0.392 | Yes | -          |
| 113557501 | A/G | 0.394 | NA      | 0.493 | 0.290 | Yes | -          |
| 117220718 | A/G | 0.327 | NA      | 0.379 | 0.224 | Yes | -          |
| 119887315 | C/T | 0.204 | 0.520   | 0.288 | 0.261 | Yes | -          |
| 157965173 | A/G | 0.336 | NA      | 0.203 | 0.381 | Yes | -          |
| 27594741  | C/T | 0.394 | NA      | 0.489 | 0.188 | Yes | -          |
| 80390003  | A/G | 0.086 | NA      | 0.194 | 0.205 | Yes | -          |
| 150220269 | C/T | 0.044 | 0.070   | 0.128 | 0.062 | Yes | -          |
| 61077763  | C/T | 0.412 | 0.420   | 0.269 | 0.210 | Yes | -          |
| 233823578 | C/T | 0.580 | 0.480   | 0.604 | 0.489 | Yes | -          |
| 43660422  | C/T | 0.146 | 0.129   | 0.176 | 0.199 | Yes | -          |
| 64115570  | A/G | 0.553 | 0.538   | 0.555 | 0.619 | Yes | -          |
| 64115570  | A/G | 0.553 | 0.460   | 0.555 | 0.619 | Yes | -          |
| 101277754 | A/G | 0.456 | 0.480   | 0.358 | 0.375 | Yes | -          |
| 38888207  | C/T | 0.027 | 0.020   | 0.076 | 0.085 | Yes | -          |
| 67478546  | A/G | 0.959 | 0.932   | 0.950 | 0.000 | Yes | -          |
| 39078567  | A/G | 0.027 | 0.025   | 0.120 | 0.102 | Yes | -          |
| 199202489 | C/T | 0.668 | 0.700   | 0.793 | 0.903 | Yes | -          |
| 40446341  | C/T | 0.646 | 0.606   | 0.500 | 0.448 | Yes | -          |
| 150239060 | A/G | 0.049 | 0.090   | 0.136 | 0.153 | Yes | -          |
| 67448104  | C/T | 0.292 | 0.320   | 0.414 | 0.563 | Yes | -          |
| 131812292 | G/T | 0.397 | 0.422   | 0.290 | 0.102 | Yes | -          |
| 6142018   | C/T | 0.827 | 0.852   | 0.838 | 0.892 | Yes | -          |
| 25345971  | A/G | 0.314 | 0.326   | 0.469 | 0.256 | Yes | -          |
| 50240218  | A/G | 0.650 | 0.680   | 0.690 | 0.898 | Yes | -          |
| 28398018  | C/T | 0.372 | 0.386   | 0.235 | 0.307 | Yes | -          |
| 49297083  | C/G | 0.350 | 0.290   | 0.188 | 0.097 | Yes | -          |
| 40437266  | G/T | 0.168 | 0.130   | 0.052 | 0.017 | Yes | -          |
| 3378317   | G/T | 0.646 | 0.639   | 0.566 | 0.886 | Yes | -          |
| 20258641  | A/G | 0.168 | 0.203   | 0.239 | 0.375 | Yes | -          |
| 59583157  | C/T | 0.796 | 0.774   | 0.793 | 0.739 | Yes | -          |
| 91029880  | A/C | 0.692 | 0.658   | 0.767 | 0.761 | Yes | -          |
| 37989719  | C/T | 0.854 | 0.830   | 0.724 | 0.784 | Yes | -          |
| 12769947  | G/T | 0.115 | 0.150   | 0.142 | 0.102 | Yes | -          |
| 12769947  | G/T | 0.115 | 0.160   | 0.142 | 0.102 | Yes | -          |
| 96270305  | C/T | 0.429 | 0.409   | 0.355 | 0.284 | Yes | -          |
| 53906086  | A/G | 0.559 | 0.487   | 0.374 | 0.222 | Yes | -          |
| 35294289  | A/G | 0.473 | 0.470   | 0.466 | 0.330 | Yes | -          |
| 205006527 | A/G | 0.181 | 0.157   | 0.219 | 0.190 | Yes | -          |
| 43355925  | A/G | 0.243 | 0.220   | 0.279 | 0.369 | Yes | -          |
| 116592706 | C/T | 0.642 | 0.682   | 0.746 | 0.727 | Yes | -          |
| 233845149 | A/G | 0.571 | 0.530   | 0.603 | 0.494 | Yes | -          |
| 116606261 | A/G | 0.637 | 0.680   | 0.776 | 0.761 | Yes | -          |
| 131770127 | C/G | 0.819 | 0.170   | 0.808 | 0.824 | Yes | -          |
| 3852542   | C/T | 0.460 | 0.410   | 0.511 | 0.665 | Yes | -          |
| 20836710  | C/T | 0.823 | 0.780   | 0.811 | 0.718 | Yes | -          |
| 28922487  | C/G | 0.385 | 0.471   | 0.600 | 0.636 | Yes | -          |
| 230825118 | C/T | 0.205 | 0.187   | 0.198 | 0.233 | Yes | -          |
| 37767727  | A/G | 0.549 | 0.570   | 0.598 | 0.500 | Yes | -          |
| 44439989  | A/G | 0.412 | 0.390   | 0.285 | 0.381 | Yes | -          |
| 147888981 | C/G | 0.451 | 0.460   | 0.464 | 0.562 | Yes | -          |
| 75978964  | C/T | 0.394 | 0.390   | 0.459 | 0.256 | Yes | -          |
| 87542348  | C/T | 0.140 | 0.119   | 0.145 | 0.261 | Yes | -          |
| 32766288  | A/G | 0.442 | 0.480   | 0.439 | 0.625 | Yes | -          |
| 49676987  | A/G | 0.257 | 0.280   | 0.354 | 0.227 | Yes | -          |
| 23705444  | G/T | 0.235 | 0.250   | 0.178 | 0.199 | Yes | -          |
| 36874244  | A/G | 0.319 | 0.350   | 0.407 | 0.500 | Yes | -          |
| 21737803  | A/G | 0.504 | 0.480   | 0.548 | 0.631 | Yes | -          |
| 6338660   | C/T | 0.035 | 0.070   | 0.021 | 0.131 | Yes | -          |
| 33639790  | G/T | 0.022 | 0.070   | 0.118 | 0.114 | Yes | -          |
| 99118222  | A/G | 0.102 | 0.060   | 0.070 | 0.227 | Yes | -          |
| 38118955  | C/T | 0.128 | 0.120   | 0.191 | 0.193 | Yes | -          |
| 111219438 | A/C | 0.257 | 0.280   | 0.345 | 0.460 | Yes | -          |
| 167744198 | A/C | 0.068 | 0.060   | 0.150 | 0.080 | Yes | -          |
| 33228215  | A/G | 0.097 | 0.091   | 0.179 | 0.148 | Yes | -          |
| 81841839  | A/G | 0.230 | 0.310   | 0.471 | 0.233 | Yes | -          |
| 92338075  | C/G | 0.389 | NonEuro | 0.427 | 0.460 | Yes | -          |
| 187011774 | A/C | 0.296 | NonEuro | 0.411 | 0.511 | No  | Duplicated |
| 20769229  | C/G | 0.336 | NonEuro | 0.317 | 0.216 | Yes | -          |
| 29975759  | C/T | 0.695 | 0.940   | 0.700 | 0.744 | Yes | -          |
| 64403825  | A/G | 0.137 | 0.770   | 0.228 | 0.381 | Yes | -          |
| 148746647 | A/G | 0.341 | 0.280   | 0.413 | 0.432 | Yes | -          |
| 93015292  | A/G | 0.366 | 0.770   | 0.438 | 0.506 | Yes | -          |
| 133188489 | A/C | 0.097 | 0.290   | 0.188 | 0.155 | Yes | -          |
| 28357667  | A/G | 0.284 | 0.290   | 0.180 | 0.262 | Yes | -          |
| 93583458  | A/G | 0.876 | NA      | 0.897 | 0.960 | Yes | -          |

|           |     |       |       |       |       |     |                 |
|-----------|-----|-------|-------|-------|-------|-----|-----------------|
| 166322071 | A/G | 0.911 | 0.900 | 0.931 | 0.977 | Yes | -               |
| 58934736  | C/T | 0.584 | NA    | 0.556 | 0.614 | Yes | -               |
| 18667842  | C/T | 0.664 | 0.650 | 0.780 | 0.653 | Yes | -               |
| 149476804 | C/T | 0.575 | 0.580 | 0.615 | 0.580 | Yes | -               |
| 158433273 | C/T | 0.022 | 0.040 | 0.072 | 0.051 | Yes | -               |
| 16873795  | C/T | 0.345 | 0.720 | 0.350 | 0.176 | Yes | -               |
| 32850785  | A/G | 0.509 | 0.600 | 0.579 | 0.625 | Yes | -               |
| 10917030  | A/G | 0.522 | 0.460 | 0.431 | 0.455 | Yes | -               |
| 72864420  | A/C | 0.321 | 0.350 | 0.608 | 0.869 | Yes | -               |
| 72864420  | A/C | 0.321 | 0.360 | 0.608 | 0.869 | Yes | -               |
| 44795465  | A/G | 0.416 | 0.390 | 0.259 | 0.159 | Yes | -               |
| 113837114 | A/G | 0.633 | 0.350 | 0.618 | 0.619 | Yes | -               |
| 110492139 | C/T | 0.438 | 0.530 | 0.396 | 0.131 | Yes | -               |
| 10307114  | A/G | 0.106 | 0.890 | 0.060 | 0.040 | Yes | -               |
| 38417494  | A/G | 0.597 | 0.330 | 0.572 | 0.597 | Yes | -               |
| 175997565 | A/G | 0.854 | 0.440 | 0.745 | 0.744 | Yes | -               |
| 38569977  | G/T | 0.217 | 0.400 | 0.210 | 0.227 | Yes | -               |
| 150298143 | C/T | 0.376 | 0.350 | 0.385 | 0.381 | Yes | -               |
| 113279826 | A/G | 0.181 | 0.220 | 0.262 | 0.233 | Yes | -               |
| 113279826 | A/G | 0.181 | 0.220 | 0.262 | 0.233 | Yes | -               |
| 113279826 | A/G | 0.181 | 0.220 | 0.262 | 0.233 | Yes | -               |
| 1620821   | C/T | 0.819 | 0.760 | 0.670 | 0.591 | Yes | -               |
| 34271281  | A/C | 0.761 | 0.750 | 0.774 | 0.818 | Yes | -               |
| 22358458  | G/T | 0.407 | 0.523 | 0.233 | 0.415 | Yes | -               |
| 113245654 | C/T | 0.327 | 0.720 | 0.361 | 0.312 | Yes | -               |
| 227063245 | C/T | 0.009 | 0.110 | 0.000 | 0.000 | Yes | -               |
| 213532290 | A/G | 0.243 | 0.740 | 0.248 | 0.233 | Yes | -               |
| 131890876 | G/T | 0.832 | 0.160 | 0.688 | 0.847 | Yes | -               |
| 81975074  | A/G | 0.075 | 0.070 | 0.041 | 0.068 | Yes | -               |
| 121763831 | A/C | 0.214 | 0.230 | 0.135 | 0.102 | Yes | -               |
| 135143696 | C/T | 0.204 | 0.220 | 0.273 | 0.125 | Yes | -               |
| 58443528  | A/C | 0.858 | 0.780 | 0.904 | 0.000 | Yes | -               |
| 148884285 | A/T | 0.558 | 0.980 | 0.579 | 0.722 | Yes | -               |
| 110652392 | A/G | 0.000 | 0.190 | 0.015 | 0.006 | Yes | -               |
| 111302166 | A/T | 0.000 | 0.210 | 0.000 | 0.000 | Yes | -               |
| 111129784 | A/G | 0.000 | 0.130 | 0.000 | 0.000 | Yes | -               |
| 96056331  | A/G | 0.319 | 0.210 | 0.417 | 0.267 | Yes | -               |
| 66846138  | A/T | 0.000 | 0.030 | 0.011 | 0.006 | Yes | -               |
| 124213600 | A/G | 0.893 | 0.820 | 0.825 | 0.851 | Yes | -               |
| 96060365  | A/G | 0.274 | 0.150 | 0.366 | 0.216 | Yes | -               |
| 27460012  | C/T | 0.323 | 0.250 | 0.194 | 0.216 | Yes | -               |
| 124766048 | C/T | 0.442 | 0.330 | 0.338 | 0.170 | Yes | -               |
| 89433290  | C/T | 0.553 | NA    | 0.728 | 0.705 | Yes | -               |
| 1585021   | A/G | 0.170 | NA    | 0.243 | 0.125 | Yes | -               |
| 26039213  | A/G | 0.208 | 0.230 | 0.723 | 0.909 | Yes | -               |
| 26039213  | A/G | 0.208 | 0.230 | 0.723 | 0.909 | Yes | -               |
| 88650694  | A/G | 0.226 | 0.270 | 0.158 | 0.114 | Yes | -               |
| 92348358  | C/G | 0.300 | 0.300 | 0.245 | 0.000 | No  | Duplicated      |
| 124548468 | A/G | 0.774 | 0.780 | 0.859 | 0.784 | Yes | -               |
| 124548468 | A/G | 0.774 | 0.780 | 0.859 | 0.784 | No  | Duplicated      |
| 114746031 | A/T | 0.296 | 0.310 | 0.228 | 0.305 | No  | D to rs12243326 |
| 169471394 | C/T | 0.674 | 0.700 | 0.777 | 0.835 | Yes | -               |
| 169471394 | C/T | 0.674 | 0.700 | 0.777 | 0.835 | No  | Duplicated      |
| 27594741  | C/T | 0.606 | 0.620 | 0.511 | 0.812 | Yes | -               |
| 27594741  | C/T | 0.606 | 0.620 | 0.511 | 0.812 | No  | Duplicated      |
| 27594741  | C/T | 0.606 | 0.620 | 0.511 | 0.812 | No  | Duplicated      |
| 47292896  | A/T | 0.712 | 0.750 | 0.782 | 0.784 | Yes | -               |
| 27594741  | C/T | 0.606 | 0.620 | 0.511 | 0.812 | No  | Duplicated      |
| 27594741  | C/T | 0.606 | 0.620 | 0.511 | 0.812 | No  | Duplicated      |
| 92348358  | C/G | 0.300 | 0.280 | 0.245 | 0.000 | No  | Duplicated      |
| 169471394 | C/T | 0.674 | 0.700 | 0.777 | 0.835 | No  | Duplicated      |
| 169471394 | C/T | 0.326 | 0.300 | 0.224 | 0.835 | No  | Duplicated      |
| 169482317 | A/C | 0.372 | 0.340 | 0.306 | 0.195 | No  | LD to rs560887  |
| 23402119  | A/C | 0.540 | 0.330 | 0.628 | 0.557 | Yes | -               |
| 138061965 | C/T | 0.283 | 0.130 | 0.301 | 0.182 | Yes | -               |
| 60573750  | C/T | 0.699 | 0.800 | 0.462 | 0.443 | Yes | -               |
| 5263085   | A/G | 0.973 | 0.930 | 0.986 | 0.909 | Yes | -               |
| 24566924  | A/C | 0.363 | 0.370 | 0.518 | 0.369 | Yes | -               |
| 131829625 | A/G | 0.186 | 0.210 | 0.294 | 0.408 | Yes | -               |
| 64053049  | C/T | 0.730 | 0.840 | 0.847 | 0.807 | Yes | -               |
| 122866607 | A/G | 0.173 | 0.210 | 0.140 | 0.114 | Yes | -               |
| 88551344  | A/C | 0.571 | 0.670 | 0.661 | 0.881 | Yes | -               |
| 411033    | C/T | 0.559 | 0.420 | 0.521 | 0.330 | Yes | -               |
| 33331111  | A/G | 0.124 | 0.100 | 0.042 | 0.068 | Yes | -               |
| 62011764  | C/T | 0.150 | 0.100 | 0.169 | 0.256 | Yes | -               |
| 109898844 | G/T | 0.000 | 0.140 | 0.000 | 0.000 | Yes | -               |

|           |     |       |       |       |       |     |   |
|-----------|-----|-------|-------|-------|-------|-----|---|
| 72615834  | A/G | 0.257 | 0.100 | 0.110 | 0.182 | Yes | - |
| 111129784 | A/G | 0.000 | 0.150 | 0.000 | 0.000 | Yes | - |
| 119908339 | C/T | 0.425 | 0.480 | 0.490 | 0.489 | Yes | - |
| 23320213  | A/G | 0.270 | 0.240 | 0.260 | 0.199 | Yes | - |
| 147040860 | A/C | 0.138 | 0.420 | 0.163 | 0.244 | Yes | - |
| 45500328  | A/G | 0.987 | 0.810 | 0.955 | 0.915 | Yes | - |
| 53231077  | C/T | 0.509 | 0.480 | 0.594 | 0.557 | Yes | - |
| 1339516   | A/C | 0.527 | 0.490 | 0.560 | 0.645 | Yes | - |
| 117982577 | A/G | 0.310 | 0.690 | 0.279 | 0.403 | Yes | - |
| 78278822  | C/T | 0.314 | 0.310 | 0.424 | 0.438 | Yes | - |
| 44195593  | C/T | 0.195 | 0.180 | 0.213 | 0.114 | Yes | - |
| 41749562  | A/G | 0.270 | 0.240 | 0.200 | 0.216 | Yes | - |
| 169499684 | A/G | 0.624 | 0.640 | 0.693 | 0.784 | Yes | - |
| 41668351  | C/T | 0.968 | 0.970 | 0.983 | 0.000 | Yes | - |
| 70769919  | C/T | 0.504 | 0.500 | 0.592 | 0.529 | Yes | - |
| 20833402  | C/G | 0.204 | 0.530 | 0.269 | 0.199 | Yes | - |
| 80520982  | C/T | 0.345 | 0.640 | 0.320 | 0.290 | Yes | - |
| 31110595  | C/T | 0.810 | 0.540 | 0.605 | 0.807 | Yes | - |
| 31166157  | C/T | 0.062 | 0.140 | 0.224 | 0.125 | Yes | - |
| 32771829  | C/T | 0.522 | 0.450 | 0.366 | 0.432 | Yes | - |
| 39998408  | G/T | 0.274 | 0.350 | 0.317 | 0.148 | Yes | - |
| 26039213  | A/G | 0.208 | 0.230 | 0.723 | 0.909 | Yes | - |
| 11954630  | C/T | 0.040 | NA    | 0.073 | 0.051 | Yes | - |
| 43441008  | C/T | 0.531 | NA    | 0.448 | 0.500 | Yes | - |
| 150721215 | A/G | 0.696 | NA    | 0.745 | 0.767 | Yes | - |
| 99692646  | A/T | 0.239 | 0.250 | 0.153 | 0.409 | Yes | - |
| 19891970  | A/C | 0.115 | 0.120 | 0.131 | 0.085 | Yes | - |
| 19891970  | A/C | 0.115 | 0.100 | 0.131 | 0.085 | Yes | - |
| 35067382  | C/G | 0.683 | 0.340 | 0.718 | 0.699 | Yes | - |
| 21052397  | A/G | 0.788 | 0.780 | 0.697 | 0.455 | Yes | - |
| 109898844 | G/T | 0.000 | 0.140 | 0.000 | 0.000 | Yes | - |
| 55569880  | G/T | 0.354 | 0.100 | 0.403 | 0.420 | Yes | - |
| 56481312  | G/T | 0.210 | 0.340 | 0.238 | 0.159 | Yes | - |
| 72620810  | C/T | 0.122 | 0.120 | 0.042 | 0.062 | Yes | - |
| 61327359  | C/T | 0.344 | 0.330 | 0.279 | 0.098 | Yes | - |
| 61327924  | C/G | 0.301 | 0.170 | 0.241 | 0.097 | Yes | - |
| 61353788  | C/T | 0.866 | 0.830 | 0.899 | 0.972 | Yes | - |
| 19876926  | G/T | 0.107 | 0.110 | 0.135 | 0.085 | Yes | - |
| 42475778  | C/T | 0.036 | 0.030 | 0.029 | 0.023 | Yes | - |
| 42475778  | C/T | 0.036 | 0.030 | 0.029 | 0.023 | Yes | - |
| 111893559 | A/G | 0.000 | 0.110 | 0.000 | 0.000 | Yes | - |
| 111129784 | A/G | 0.000 | 0.150 | 0.000 | 0.000 | Yes | - |
| 228361539 | C/T | 0.568 | 0.600 | 0.500 | 0.369 | Yes | - |
| 45435666  | A/T | 0.810 | 0.810 | 0.918 | 0.892 | Yes | - |
| 45435666  | A/T | 0.190 | 0.180 | 0.082 | 0.108 | Yes | - |
| 45435666  | A/T | 0.810 | 0.840 | 0.918 | 0.892 | Yes | - |
| 66459571  | A/G | 0.907 | 0.870 | 0.804 | 0.898 | Yes | - |
| 66459571  | A/G | 0.093 | 0.110 | 0.196 | 0.102 | Yes | - |
| 108379551 | C/G | 0.482 | 0.450 | 0.466 | 0.688 | Yes | - |
| 108379551 | C/G | 0.518 | 0.450 | 0.535 | 0.312 | Yes | - |
| 66582496  | A/G | 0.139 | 0.170 | 0.231 | 0.131 | Yes | - |
| 34660775  | A/G | 0.143 | 0.160 | 0.098 | 0.114 | Yes | - |
| 10345358  | A/G | 0.155 | 0.170 | 0.056 | 0.131 | Yes | - |
| 8375738   | C/T | 0.173 | 0.160 | 0.290 | 0.250 | Yes | - |
| 106687476 | A/G | 0.920 | 0.880 | 0.859 | 0.926 | Yes | - |
| 106687476 | A/G | 0.080 | 0.130 | 0.141 | 0.074 | Yes | - |
| 106696891 | A/G | 0.916 | 0.860 | 0.850 | 0.915 | Yes | - |
| 106687041 | C/T | 0.721 | 0.640 | 0.432 | 0.425 | Yes | - |
| 50114786  | A/G | 0.183 | 0.170 | 0.235 | 0.057 | Yes | - |
| 39800767  | A/G | 0.257 | 0.230 | 0.145 | 0.057 | Yes | - |
| 15279578  | C/T | 0.106 | 0.120 | 0.041 | 0.080 | Yes | - |
| 123026120 | G/T | 0.385 | 0.340 | 0.379 | 0.195 | Yes | - |
| 56461987  | C/G | 0.318 | 0.330 | 0.297 | 0.233 | Yes | - |
| 228362314 | A/G | 0.429 | 0.390 | 0.493 | 0.636 | Yes | - |
| 228362314 | A/G | 0.429 | 0.400 | 0.493 | 0.636 | Yes | - |
| 228362314 | A/G | 0.429 | 0.400 | 0.493 | 0.636 | Yes | - |
| 45421212  | C/T | 0.810 | 0.830 | 0.913 | 0.892 | Yes | - |
| 45421212  | C/T | 0.190 | 0.170 | 0.087 | 0.108 | Yes | - |
| 50068124  | C/G | 0.765 | 0.150 | 0.737 | 0.615 | Yes | - |
| 15286034  | A/C | 0.146 | 0.070 | 0.049 | 0.074 | Yes | - |
| 45413088  | A/G | 0.186 | 0.150 | 0.083 | 0.108 | Yes | - |
| 48475469  | A/G | 0.642 | 0.610 | 0.559 | 0.364 | Yes | - |
| 123827546 | C/T | 0.288 | 0.310 | 0.389 | 0.437 | Yes | - |
| 116154127 | C/G | 0.121 | 0.120 | 0.177 | 0.176 | Yes | - |
| 116154127 | C/G | 0.121 | 0.130 | 0.177 | 0.176 | Yes | - |
| 116154127 | C/G | 0.121 | 0.140 | 0.177 | 0.176 | Yes | - |

|           |     |       |       |       |       |     |   |
|-----------|-----|-------|-------|-------|-------|-----|---|
| 2375258   | C/T | 0.124 | 0.160 | 0.101 | 0.239 | Yes | - |
| 55542640  | A/G | 0.602 | 0.600 | 0.614 | 0.591 | Yes | - |
| 55542640  | A/G | 0.398 | 0.380 | 0.386 | 0.409 | Yes | - |
| 55542640  | A/G | 0.602 | 0.650 | 0.614 | 0.591 | Yes | - |
| 88390431  | C/T | 0.527 | 0.560 | 0.448 | 0.591 | Yes | - |
| 64644614  | C/T | 0.504 | 0.490 | 0.618 | 0.688 | Yes | - |
| 64644614  | C/T | 0.496 | 0.490 | 0.382 | 0.312 | Yes | - |
| 64644614  | C/T | 0.496 | 0.510 | 0.382 | 0.312 | Yes | - |
| 97299524  | G/T | 0.350 | 0.310 | 0.238 | 0.210 | Yes | - |
| 142626120 | A/G | 0.088 | 0.260 | 0.051 | 0.102 | Yes | - |
| 142626120 | A/G | 0.088 | 0.260 | 0.051 | 0.102 | Yes | - |
| 219642592 | G/T | 0.890 | 0.910 | 0.938 | 0.971 | Yes | - |
| 98578959  | C/G | 0.018 | 0.290 | 0.131 | 0.097 | Yes | - |
| 82359162  | A/T | 0.496 | 0.520 | 0.618 | 0.619 | Yes | - |
| 82359162  | A/T | 0.496 | 0.520 | 0.618 | 0.619 | Yes | - |
| 135715782 | A/G | 0.301 | 0.330 | 0.374 | 0.398 | Yes | - |
| 14888161  | G/T | 0.137 | 0.330 | 0.055 | 0.108 | Yes | - |
| 92502635  | G/T | 0.788 | 0.770 | 0.826 | 0.892 | Yes | - |
| 59116763  | C/G | 0.721 | 0.300 | 0.799 | 0.818 | Yes | - |
| 59116763  | C/G | 0.279 | 0.700 | 0.201 | 0.182 | Yes | - |
| 88705737  | C/T | 0.668 | 0.670 | 0.748 | 0.552 | Yes | - |
| 203873416 | C/T | 0.049 | 0.150 | 0.085 | 0.114 | Yes | - |
| 118897020 | A/G | 0.624 | 0.480 | 0.663 | 0.636 | Yes | - |
| 17807301  | G/T | 0.257 | 0.330 | 0.179 | 0.114 | Yes | - |
| 52202982  | C/T | 0.991 | 0.870 | 0.993 | 0.943 | Yes | - |
| 50004556  | C/T | 0.336 | 0.350 | 0.367 | 0.398 | Yes | - |
| 51785154  | C/T | 0.460 | 0.470 | 0.464 | 0.619 | Yes | - |
| 46774789  | A/G | 0.314 | 0.350 | 0.355 | 0.301 | Yes | - |
| 135706519 | C/G | 0.619 | 0.600 | 0.703 | 0.523 | Yes | - |
| 118685496 | A/G | 0.265 | 0.240 | 0.177 | 0.267 | Yes | - |
| 2121954   | A/T | 0.459 | 0.450 | 0.543 | 0.415 | Yes | - |
| 57263345  | A/G | 0.142 | 0.070 | 0.228 | 0.153 | Yes | - |
| 57263345  | A/G | 0.142 | 0.070 | 0.228 | 0.153 | Yes | - |
| 217980143 | C/T | 0.805 | 0.790 | 0.752 | 0.585 | Yes | - |
| 225864573 | A/G | 0.754 | 0.820 | 0.938 | 0.784 | Yes | - |
| 39027527  | C/T | 0.699 | 0.680 | 0.573 | 0.784 | Yes | - |
| 101250468 | C/T | 0.000 | 0.260 | 0.007 | 0.028 | Yes | - |
| 51112786  | C/T | 0.788 | 0.200 | 0.723 | 0.767 | Yes | - |
| 122685098 | A/G | 0.473 | 0.470 | 0.631 | 0.659 | Yes | - |
| 219657428 | C/T | 0.031 | 0.390 | 0.031 | 0.080 | Yes | - |
| 96354562  | A/G | 0.031 | 0.140 | 0.069 | 0.097 | Yes | - |
| 118669928 | C/G | 0.284 | 0.420 | 0.219 | 0.273 | Yes | - |
| 46628935  | A/G | 0.371 | 0.360 | 0.420 | 0.403 | Yes | - |
| 78396214  | C/T | 0.119 | 0.120 | 0.034 | 0.011 | Yes | - |
| 4049800   | C/T | 0.637 | 0.630 | 0.860 | 0.790 | Yes | - |
| 37814117  | A/T | 0.947 | 0.910 | 0.951 | 0.000 | Yes | - |
| 56002077  | C/T | 0.735 | 0.760 | 0.804 | 0.699 | Yes | - |
| 44841652  | A/G | 0.885 | 0.370 | 0.872 | 0.642 | Yes | - |
| 44841652  | A/G | 0.885 | 0.370 | 0.872 | 0.642 | Yes | - |
| 145794294 | A/G | 0.835 | 0.830 | 0.899 | 0.869 | Yes | - |
| 145794294 | A/G | 0.835 | 0.860 | 0.899 | 0.869 | Yes | - |
| 56851431  | C/T | 0.314 | 0.330 | 0.481 | 0.415 | Yes | - |
| 92102346  | C/T | 0.412 | 0.290 | 0.284 | 0.148 | Yes | - |
| 92102346  | C/T | 0.412 | 0.330 | 0.284 | 0.148 | Yes | - |
| 101037661 | C/G | 0.009 | 0.300 | 0.007 | 0.028 | Yes | - |
| 36300407  | A/C | 0.442 | 0.010 | 0.435 | 0.261 | Yes | - |
| 217831893 | A/G | 0.717 | 0.190 | 0.479 | 0.500 | Yes | - |
| 82077496  | A/G | 0.212 | 0.170 | 0.418 | 0.276 | Yes | - |
| 90001002  | C/T | 0.261 | 0.250 | 0.160 | 0.312 | Yes | - |
| 34726871  | A/G | 0.128 | 0.150 | 0.093 | 0.102 | Yes | - |
| 59330980  | C/T | 0.336 | 0.210 | 0.392 | 0.598 | Yes | - |
| 24941897  | A/G | 0.314 | 0.330 | 0.426 | 0.386 | Yes | - |
| 134400584 | C/T | 0.730 | 0.750 | 0.668 | 0.523 | Yes | - |
| 142809326 | A/G | 0.719 | 0.740 | 0.633 | 0.739 | Yes | - |
| 65093395  | C/T | 0.049 | 0.060 | 0.070 | 0.233 | Yes | - |
| 55964813  | C/T | 0.748 | 0.770 | 0.690 | 0.807 | Yes | - |
| 55964813  | C/T | 0.748 | 0.230 | 0.690 | 0.807 | Yes | - |
| 55964813  | C/T | 0.748 | 0.220 | 0.690 | 0.807 | Yes | - |
| 55964813  | C/T | 0.748 | 0.770 | 0.690 | 0.807 | Yes | - |
| 62209892  | G/T | 0.584 | 0.140 | 0.630 | 0.636 | Yes | - |
| 33380803  | A/G | 0.540 | 0.350 | 0.463 | 0.500 | Yes | - |
| 98603794  | A/G | 0.296 | 0.280 | 0.203 | 0.210 | Yes | - |
| 127008001 | C/T | 0.456 | 0.500 | 0.380 | 0.670 | Yes | - |
| 24916698  | C/T | 0.252 | 0.260 | 0.510 | 0.398 | Yes | - |
| 35510763  | A/G | 0.848 | 0.860 | 0.759 | 0.807 | Yes | - |
| 108672174 | A/G | 0.212 | 0.230 | 0.273 | 0.381 | Yes | - |

|           |     |       |       |       |       |     |            |
|-----------|-----|-------|-------|-------|-------|-----|------------|
| 52205328  | A/G | 0.544 | 0.480 | 0.525 | 0.511 | Yes | -          |
| 56230190  | A/G | 0.332 | 0.390 | 0.192 | 0.345 | Yes | -          |
| 82373128  | G/T | 0.504 | 0.290 | 0.386 | 0.381 | Yes | -          |
| 73542520  | C/T | 0.221 | 0.420 | 0.383 | 0.466 | Yes | -          |
| 33370575  | C/T | 0.336 | 0.360 | 0.559 | 0.676 | Yes | -          |
| 33370575  | C/T | 0.336 | 0.440 | 0.559 | 0.676 | Yes | -          |
| 33377622  | A/G | 0.664 | 0.620 | 0.421 | 0.318 | Yes | -          |
| 33373198  | C/T | 0.274 | 0.260 | 0.262 | 0.290 | Yes | -          |
| 218231407 | A/G | 0.996 | 0.640 | 0.969 | 0.926 | Yes | -          |
| 130533446 | C/T | 0.212 | 0.210 | 0.238 | 0.170 | Yes | -          |
| 82196836  | A/G | 0.319 | 0.320 | 0.377 | 0.374 | Yes | -          |
| 130390812 | C/T | 0.765 | 0.760 | 0.849 | 0.892 | Yes | -          |
| 142721265 | A/G | 0.735 | 0.710 | 0.633 | 0.739 | Yes | -          |
| 41303458  | C/T | 0.619 | 0.560 | 0.673 | 0.722 | Yes | -          |
| 88896031  | C/T | 0.619 | 0.610 | 0.772 | 0.778 | Yes | -          |
| 219652090 | A/G | 0.106 | 0.100 | 0.052 | 0.028 | Yes | -          |
| 170456512 | G/T | 0.115 | 0.220 | 0.217 | 0.216 | Yes | -          |
| 17626828  | C/T | 0.885 | 0.840 | 0.880 | 0.767 | Yes | -          |
| 17626828  | C/T | 0.885 | 0.890 | 0.880 | 0.767 | Yes | -          |
| 145862529 | A/G | 0.549 | 0.430 | 0.709 | 0.756 | Yes | -          |
| 34346492  | A/G | 0.195 | 0.210 | 0.141 | 0.142 | Yes | -          |
| 34346492  | A/G | 0.195 | 0.210 | 0.141 | 0.142 | Yes | -          |
| 111985226 | A/G | 0.208 | 0.210 | 0.335 | 0.176 | Yes | -          |
| 66582736  | C/T | 0.387 | 0.350 | 0.398 | 0.597 | Yes | -          |
| 91496975  | A/C | 0.631 | 0.520 | 0.444 | 0.613 | Yes | -          |
| 142588260 | A/G | 0.420 | 0.480 | 0.252 | 0.273 | Yes | -          |
| 142588260 | A/G | 0.420 | 0.360 | 0.252 | 0.273 | Yes | -          |
| 135707814 | A/C | 0.252 | 0.270 | 0.210 | 0.409 | Yes | -          |
| 232504854 | C/T | 0.920 | 0.940 | 0.885 | 0.931 | Yes | -          |
| 232785308 | A/G | 0.969 | 0.450 | 0.979 | 0.915 | Yes | -          |
| 73734177  | C/T | 0.460 | 0.470 | 0.371 | 0.648 | Yes | -          |
| 57262703  | A/G | 0.146 | 0.080 | 0.257 | 0.153 | Yes | -          |
| 78322734  | C/T | 0.288 | 0.270 | 0.290 | 0.375 | Yes | -          |
| 16358732  | G/T | 0.341 | 0.320 | 0.443 | 0.460 | Yes | -          |
| 64658147  | G/T | 0.527 | 0.580 | 0.684 | 0.759 | Yes | -          |
| 2729628   | C/T | 0.699 | 0.720 | 0.900 | 0.830 | Yes | -          |
| 90813978  | A/G | 0.590 | 0.480 | 0.554 | 0.551 | Yes | -          |
| 87160693  | A/T | 0.496 | 0.470 | 0.478 | 0.591 | Yes | -          |
| 45245158  | A/G | 0.602 | 0.650 | 0.531 | 0.557 | Yes | -          |
| 7135762   | A/G | 0.739 | 0.740 | 0.629 | 0.574 | Yes | -          |
| 17528909  | A/G | 0.344 | 0.350 | 0.132 | 0.153 | Yes | -          |
| 6568893   | A/G | 0.593 | 0.530 | 0.741 | 0.653 | Yes | -          |
| 142619725 | A/G | 0.071 | 0.240 | 0.035 | 0.074 | Yes | -          |
| 72520103  | C/T | 0.228 | 0.220 | 0.166 | 0.193 | Yes | -          |
| 151045974 | A/G | 0.286 | NA    | 0.245 | 0.000 | Yes | -          |
| 35800170  | C/T | 0.478 | NA    | 0.563 | 0.636 | Yes | -          |
| 54691821  | A/G | 0.121 | 0.160 | 0.137 | 0.142 | Yes | -          |
| 1339516   | A/C | 0.527 | 0.400 | 0.560 | 0.645 | Yes | -          |
| 31193749  | A/G | 0.518 | 0.350 | 0.376 | 0.335 | Yes | -          |
| 49313780  | C/T | 0.403 | 0.260 | 0.278 | 0.278 | Yes | -          |
| 135468266 | A/G | 0.230 | 0.370 | 0.259 | 0.131 | Yes | -          |
| 55425101  | A/G | 0.689 | 0.420 | 0.615 | 0.000 | Yes | -          |
| 21876759  | A/C | 0.398 | 0.290 | 0.302 | 0.159 | Yes | -          |
| 189169768 | A/C | 0.407 | 0.310 | 0.432 | 0.227 | Yes | -          |
| 42033268  | A/T | 0.845 | NA    | 0.724 | 0.494 | Yes | -          |
| 151045974 | A/G | 0.286 | NA    | 0.245 | 0.000 | Yes | -          |
| 9770057   | G/T | 0.593 | NA    | 0.735 | 0.773 | Yes | -          |
| 33141000  | A/G | 0.155 | 0.600 | 0.191 | 0.358 | Yes | -          |
| 32837990  | A/G | 0.522 | 0.830 | 0.778 | 0.778 | Yes | -          |
| 10308058  | A/G | 0.681 | 0.720 | 0.672 | 0.716 | Yes | -          |
| 32786977  | A/G | 0.394 | 0.360 | 0.490 | 0.307 | Yes | -          |
| 198670488 | A/G | 0.867 | 0.890 | 0.921 | 0.943 | Yes | -          |
| 32530758  | C/T | 0.973 | 0.610 | 0.983 | 0.898 | Yes | -          |
| 42932615  | C/T | 0.765 | NA    | 0.699 | 0.535 | Yes | -          |
| 31251561  | A/C | 0.607 | 0.625 | 0.815 | 0.716 | Yes | -          |
| 32850785  | A/G | 0.509 | 0.600 | 0.579 | 0.625 | Yes | -          |
| 20273155  | A/G | 0.823 | 0.810 | 0.883 | 0.716 | Yes | -          |
| 57192115  | A/G | 0.071 | 0.880 | 0.063 | 0.041 | Yes | -          |
| 94631554  | A/G | 0.765 | 0.740 | 0.710 | 0.682 | Yes | -          |
| 237503165 | A/T | 0.188 | 0.140 | 0.201 | 0.148 | Yes | -          |
| 100541468 | C/T | 0.482 | 0.450 | 0.517 | 0.705 | Yes | -          |
| 116154127 | C/G | 0.121 | 0.140 | 0.177 | 0.176 | No  | Duplicated |
| 1339516   | A/C | 0.473 | 0.410 | 0.440 | 0.355 | Yes | -          |
| 28753460  | C/T | 0.690 | 0.810 | 0.476 | 0.500 | Yes | -          |
| 111316177 | A/G | 0.540 | NA    | 0.528 | 0.557 | Yes | -          |
| 9307225   | A/G | 0.602 | 0.600 | 0.597 | 0.500 | Yes | -          |

|           |     |       |         |       |       |     |            |
|-----------|-----|-------|---------|-------|-------|-----|------------|
| 32766057  | C/T | 0.124 | 0.130   | 0.107 | 0.278 | Yes | -          |
| 46336018  | C/T | 0.301 | 0.248   | 0.387 | 0.341 | Yes | -          |
| 32713862  | C/T | 0.080 | 0.130   | 0.146 | 0.102 | Yes | -          |
| 27872653  | C/T | 0.482 | 0.466   | 0.465 | 0.364 | Yes | -          |
| 205824138 | A/G | 0.858 | 0.408   | 0.808 | 0.517 | Yes | -          |
| 5263085   | A/G | 0.027 | 0.066   | 0.014 | 0.091 | Yes | -          |
| 67478546  | A/G | 0.959 | 0.930   | 0.950 | 0.000 | Yes | -          |
| 116632459 | C/T | 0.040 | 0.530   | 0.034 | 0.108 | Yes | -          |
| 116632459 | C/T | 0.960 | 0.470   | 0.966 | 0.892 | Yes | -          |
| 28745016  | C/T | 0.385 | 0.370   | 0.241 | 0.307 | Yes | -          |
| 117502578 | G/T | 0.473 | 0.460   | 0.483 | 0.483 | Yes | -          |
| 70571668  | C/T | 0.920 | 0.060   | 0.710 | 0.597 | Yes | -          |
| 87896435  | C/T | 0.956 | 0.060   | 0.931 | 0.926 | Yes | -          |
| 10798464  | G/T | 0.097 | 0.090   | 0.222 | 0.267 | Yes | -          |
| 43321787  | C/T | 0.124 | 0.110   | 0.145 | 0.097 | Yes | -          |
| 31138124  | A/G | 0.438 | 0.380   | 0.431 | 0.352 | Yes | -          |
| 77327696  | A/G | 0.969 | NonEuro | 0.899 | 0.943 | Yes | -          |
| 102984920 | A/G | 0.000 | NonEuro | 0.000 | 0.000 | Yes | -          |
| 119364817 | C/T | 0.938 | NonEuro | 0.931 | 0.886 | Yes | -          |
| 38144398  | A/G | 0.053 | NonEuro | 0.107 | 0.097 | Yes | -          |
| 37071072  | A/G | 0.085 | NonEuro | 0.186 | 0.091 | Yes | -          |
| 4065761   | C/G | 0.336 | NonEuro | 0.454 | 0.278 | Yes | -          |
| 45948606  | A/G | 0.777 | NonEuro | 0.855 | 0.892 | Yes | -          |
| 25027195  | C/T | 0.558 | NonEuro | 0.674 | 0.824 | Yes | -          |
| 23839487  | C/T | 1.000 | NonEuro | 1.000 | 0.000 | No  | Duplicated |
| 23839487  | C/T | 1.000 | NonEuro | 1.000 | 1.000 | Yes | -          |
| 84325735  | A/C | 0.336 | NonEuro | 0.510 | 0.233 | Yes | -          |
| 88762903  | A/G | 0.612 | NonEuro | 0.553 | 0.415 | Yes | -          |
| 7270834   | G/T | 0.447 | 0.390   | 0.380 | 0.375 | Yes | -          |
| 46720078  | C/G | 0.673 | 0.650   | 0.645 | 0.812 | Yes | -          |
| 46720078  | C/G | 0.673 | 0.650   | 0.645 | 0.812 | Yes | -          |
| 111529037 | C/G | 0.226 | 0.240   | 0.142 | 0.114 | Yes | -          |
| 111556379 | A/T | 0.415 | 0.330   | 0.482 | 0.619 | Yes | -          |
| 151324751 | A/G | 0.447 | NA      | 0.532 | 0.392 | Yes | -          |
| 22078260  | C/T | 0.460 | 0.649   | 0.623 | 0.506 | Yes | -          |
| 104709086 | A/G | 0.925 | 0.910   | 0.750 | 0.722 | Yes | -          |
| 55600077  | A/G | 0.795 | 0.810   | 0.841 | 0.761 | Yes | -          |
| 55600077  | A/G | 0.795 | 0.810   | 0.841 | 0.761 | Yes | -          |
| 32591837  | C/T | 0.212 | 0.210   | 0.331 | 0.284 | Yes | -          |
| 74825589  | A/G | 0.805 | NA      | 0.891 | 0.960 | Yes | -          |
| 111929618 | C/T | 0.115 | 0.110   | 0.101 | 0.136 | Yes | -          |
| 106247258 | C/T | 0.271 | 0.340   | 0.377 | 0.000 | Yes | -          |
| 81517183  | A/G | 0.153 | 0.520   | 0.156 | 0.131 | Yes | -          |
| 176376469 | C/T | 0.460 | 0.440   | 0.340 | 0.466 | Yes | -          |
| 71566525  | A/T | 0.314 | 0.300   | 0.262 | 0.284 | Yes | -          |
| 64202706  | A/C | 0.230 | 0.050   | 0.177 | 0.170 | Yes | -          |
| 220338390 | C/T | 0.283 | 0.280   | 0.252 | 0.432 | Yes | -          |
| 19268718  | C/T | 0.903 | 0.910   | 0.848 | 0.886 | Yes | -          |
| 19268718  | C/T | 0.097 | 0.070   | 0.152 | 0.114 | Yes | -          |
| 19268718  | C/T | 0.097 | 0.060   | 0.152 | 0.114 | Yes | -          |
| 62890784  | A/C | 0.336 | 0.320   | 0.264 | 0.392 | Yes | -          |
| 55268627  | C/T | 0.836 | 0.770   | 0.903 | 0.955 | Yes | -          |
| 55268627  | C/T | 0.164 | 0.190   | 0.097 | 0.045 | Yes | -          |
| 55268627  | C/T | 0.836 | 0.810   | 0.903 | 0.955 | Yes | -          |
| 74684359  | A/T | 0.398 | 0.390   | 0.410 | 0.642 | Yes | -          |
| 156330747 | C/G | 0.296 | 0.370   | 0.331 | 0.369 | Yes | -          |
| 160498850 | C/T | 0.170 | 0.170   | 0.066 | 0.091 | Yes | -          |
| 19519472  | G/T | 0.095 | 0.100   | 0.131 | 0.097 | Yes | -          |
| 19519472  | G/T | 0.905 | 0.920   | 0.869 | 0.903 | Yes | -          |
| 61353788  | C/T | 0.866 | 0.830   | 0.899 | 0.972 | Yes | -          |
| 55277238  | A/G | 0.350 | 0.300   | 0.340 | 0.295 | Yes | -          |
| 219040186 | C/T | 0.705 | 0.320   | 0.785 | 0.699 | Yes | -          |
| 119873345 | A/C | 0.363 | 0.360   | 0.356 | 0.420 | Yes | -          |
| 74686840  | A/G | 0.425 | 0.440   | 0.458 | 0.653 | Yes | -          |
| 74691482  | C/T | 0.394 | 0.380   | 0.400 | 0.591 | Yes | -          |
| 50114786  | A/G | 0.183 | 0.180   | 0.235 | 0.057 | Yes | -          |
| 50114786  | A/G | 0.183 | 0.170   | 0.235 | 0.057 | Yes | -          |
| 50114786  | A/G | 0.183 | 0.160   | 0.235 | 0.057 | Yes | -          |
| 50114786  | A/G | 0.183 | 0.180   | 0.235 | 0.057 | Yes | -          |
| 50114786  | A/G | 0.183 | 0.200   | 0.235 | 0.057 | Yes | -          |
| 50114786  | A/G | 0.183 | 0.180   | 0.235 | 0.057 | Yes | -          |
| 205941798 | G/T | 0.243 | 0.320   | 0.269 | 0.352 | Yes | -          |
| 21141826  | A/G | 0.221 | 0.200   | 0.129 | 0.136 | Yes | -          |
| 21141826  | A/G | 0.779 | 0.820   | 0.871 | 0.864 | Yes | -          |
| 109623689 | A/G | 0.279 | 0.190   | 0.157 | 0.250 | Yes | -          |
| 109623689 | A/G | 0.721 | 0.770   | 0.843 | 0.750 | Yes | -          |

|           |     |       |       |       |       |     |   |
|-----------|-----|-------|-------|-------|-------|-----|---|
| 109623689 | A/G | 0.279 | 0.240 | 0.157 | 0.250 | Yes | - |
| 38662198  | C/T | 0.283 | 0.320 | 0.124 | 0.386 | Yes | - |
| 109619829 | G/T | 0.261 | 0.220 | 0.166 | 0.250 | Yes | - |
| 116157633 | A/G | 0.071 | 0.060 | 0.090 | 0.142 | Yes | - |
| 21085700  | A/G | 0.509 | 0.520 | 0.564 | 0.767 | Yes | - |
| 21085700  | A/G | 0.491 | 0.410 | 0.436 | 0.233 | Yes | - |
| 21085700  | A/G | 0.491 | 0.480 | 0.436 | 0.233 | Yes | - |
| 42780114  | A/G | 0.475 | 0.350 | 0.472 | 0.000 | Yes | - |
| 74661243  | A/C | 0.398 | 0.410 | 0.410 | 0.648 | Yes | - |
| 27594741  | C/T | 0.394 | 0.390 | 0.489 | 0.188 | Yes | - |
| 116154127 | C/G | 0.121 | 0.130 | 0.177 | 0.176 | Yes | - |
| 146960643 | A/G | 0.058 | 0.210 | 0.245 | 0.114 | Yes | - |
| 67369707  | A/G | 0.805 | 0.100 | 0.824 | 0.932 | Yes | - |
| 43355925  | A/G | 0.243 | 0.310 | 0.279 | 0.369 | Yes | - |
| 90892832  | A/G | 0.456 | 0.280 | 0.427 | 0.693 | Yes | - |
| 116598524 | C/T | 0.624 | 0.460 | 0.767 | 0.750 | Yes | - |
| 123878378 | C/G | 0.150 | 0.150 | 0.227 | 0.233 | Yes | - |
| 116157417 | C/T | 0.040 | 0.070 | 0.087 | 0.028 | Yes | - |
| 46792181  | C/T | 0.212 | 0.260 | 0.420 | 0.534 | Yes | - |
| 46792181  | C/T | 0.212 | 0.260 | 0.420 | 0.534 | Yes | - |
| 50114786  | A/G | 0.817 | 0.840 | 0.766 | 0.943 | Yes | - |
| 50114786  | A/G | 0.183 | 0.160 | 0.235 | 0.057 | Yes | - |
| 109623689 | A/G | 0.279 | 0.220 | 0.157 | 0.250 | Yes | - |
| 116154127 | C/G | 0.879 | 0.860 | 0.823 | 0.824 | Yes | - |
| 64944933  | A/G | 0.456 | 0.490 | 0.424 | 0.548 | Yes | - |
| 101851425 | A/G | 0.325 | 0.360 | 0.295 | 0.116 | Yes | - |
| 119927053 | C/T | 0.381 | 0.380 | 0.489 | 0.466 | Yes | - |
| 64791571  | A/C | 0.456 | 0.480 | 0.427 | 0.523 | Yes | - |
| 21694344  | A/G | 0.509 | 0.430 | 0.416 | 0.580 | Yes | - |
| 42663903  | A/G | 0.190 | 0.180 | 0.181 | 0.335 | Yes | - |
| 23320213  | A/G | 0.270 | 0.310 | 0.260 | 0.199 | Yes | - |
| 135313575 | A/G | 0.156 | NA    | 0.163 | 0.091 | Yes | - |
| 135129086 | A/C | 0.376 | 0.390 | 0.490 | 0.432 | Yes | - |
| 24549725  | A/G | 0.243 | 0.240 | 0.281 | 0.176 | Yes | - |
| 165423124 | C/T | 0.354 | NA    | 0.420 | 0.142 | Yes | - |
| 24599454  | A/C | 0.345 | 0.330 | 0.270 | 0.244 | Yes | - |
| 7032374   | C/T | 0.354 | 0.330 | 0.241 | 0.278 | Yes | - |
| 25246087  | A/G | 0.562 | 0.570 | 0.507 | 0.529 | Yes | - |
| 172208236 | A/G | 0.142 | 0.140 | 0.085 | 0.000 | Yes | - |
| 52228882  | A/G | 0.088 | 0.070 | 0.024 | 0.068 | Yes | - |
| 79055102  | A/C | 0.274 | 0.270 | 0.308 | 0.290 | Yes | - |
| 79350440  | A/T | 0.261 | 0.240 | 0.235 | 0.362 | Yes | - |
| 71765390  | C/T | 0.473 | 0.390 | 0.264 | 0.239 | Yes | - |
| 54032656  | C/T | 0.299 | 0.310 | 0.417 | 0.426 | Yes | - |
| 67609756  | C/G | 0.650 | 0.650 | 0.443 | 0.649 | Yes | - |
| 110800303 | C/T | 0.788 | 0.820 | 0.893 | 0.943 | Yes | - |
| 89328613  | A/C | 0.761 | 0.790 | 0.811 | 0.874 | Yes | - |
| 160830507 | A/T | 0.044 | 0.040 | 0.105 | 0.057 | Yes | - |
| 160661612 | A/G | 0.168 | 0.130 | 0.038 | 0.062 | Yes | - |
| 161057980 | A/G | 0.434 | 0.450 | 0.306 | 0.432 | Yes | - |
| 1339516   | A/C | 0.527 | 0.390 | 0.560 | 0.645 | Yes | - |
| 1339516   | A/C | 0.527 | 0.390 | 0.560 | 0.645 | Yes | - |
| 1339516   | A/C | 0.527 | 0.500 | 0.560 | 0.645 | Yes | - |
| 91243230  | C/T | 0.239 | 0.260 | 0.281 | 0.108 | Yes | - |
| 1339516   | A/C | 0.527 | 0.410 | 0.560 | 0.645 | Yes | - |
| 28667586  | C/T | 0.252 | 0.090 | 0.358 | 0.287 | Yes | - |
| 1375087   | C/T | 0.566 | NA    | 0.701 | 0.790 | Yes | - |
| 190838955 | C/T | 0.491 | 0.470 | 0.362 | 0.364 | Yes | - |
| 191833155 | A/G | 0.106 | NA    | 0.209 | 0.261 | Yes | - |
| 72059037  | C/T | 0.084 | 0.130 | 0.110 | 0.341 | Yes | - |
| 24064990  | A/G | 0.310 | 0.310 | 0.500 | 0.295 | Yes | - |
| 29134265  | C/T | 0.310 | 0.290 | 0.247 | 0.080 | Yes | - |
| 7504555   | C/T | 0.465 | 0.440 | 0.373 | 0.392 | Yes | - |
| 10514884  | C/T | 0.350 | 0.450 | 0.412 | 0.267 | Yes | - |
| 21998503  | A/G | 0.549 | 0.430 | 0.278 | 0.420 | Yes | - |
| 21801100  | C/T | 0.420 | 0.430 | 0.598 | 0.568 | Yes | - |
| 4846877   | A/G | 0.235 | NA    | 0.145 | 0.261 | Yes | - |
| 249156    | A/C | 0.176 | NA    | 0.103 | 0.307 | Yes | - |
| 35800170  | C/T | 0.478 | NA    | 0.563 | 0.636 | Yes | - |
| 139880112 | A/C | 0.500 | NA    | 0.453 | 0.379 | Yes | - |
| 4846877   | A/G | 0.235 | NA    | 0.145 | 0.261 | Yes | - |
| 45344735  | A/G | 0.288 | NA    | 0.207 | 0.256 | Yes | - |
| 35800170  | C/T | 0.478 | NA    | 0.563 | 0.636 | Yes | - |
| 135468266 | A/G | 0.230 | NA    | 0.259 | 0.131 | Yes | - |
| 109723113 | C/T | 0.416 | NA    | 0.290 | 0.170 | Yes | - |
| 52998575  | A/G | 0.429 | NA    | 0.417 | 0.256 | Yes | - |



|           |     |       |       |       |       |     |   |
|-----------|-----|-------|-------|-------|-------|-----|---|
| 6942420   | C/G | 0.841 | NA    | 0.880 | 0.833 | Yes | - |
| 56840816  | A/G | 0.394 | NA    | 0.410 | 0.448 | Yes | - |
| 56840816  | A/G | 0.394 | 0.300 | 0.410 | 0.448 | Yes | - |
| 260715    | C/T | 0.721 | NA    | 0.943 | 0.000 | Yes | - |
| 24727475  | C/T | 0.558 | NA    | 0.552 | 0.631 | Yes | - |
| 24727475  | C/T | 0.442 | 0.470 | 0.448 | 0.369 | Yes | - |
| 55341558  | C/T | 0.673 | NA    | 0.725 | 0.801 | Yes | - |
| 113060899 | C/T | 0.594 | NA    | 0.663 | 0.636 | Yes | - |
| 120849966 | C/T | 0.107 | NA    | 0.038 | 0.017 | Yes | - |
| 120849966 | C/T | 0.107 | 0.110 | 0.038 | 0.017 | Yes | - |
| 201871056 | A/G | 0.416 | 0.370 | 0.263 | 0.159 | Yes | - |
| 88650694  | A/G | 0.226 | 0.280 | 0.158 | 0.114 | Yes | - |
| 88650694  | A/G | 0.226 | 0.270 | 0.158 | 0.114 | Yes | - |
| 88283404  | A/G | 0.137 | 0.110 | 0.045 | 0.091 | Yes | - |
| 88283404  | A/G | 0.137 | 0.090 | 0.045 | 0.091 | Yes | - |
| 224631314 | C/T | 0.637 | 0.670 | 0.707 | 0.580 | Yes | - |
| 1375087   | C/T | 0.434 | 0.460 | 0.299 | 0.210 | Yes | - |
| 88594437  | A/C | 0.376 | 0.320 | 0.257 | 0.305 | Yes | - |
| 32635433  | A/G | 0.084 | 0.090 | 0.010 | 0.011 | Yes | - |
| 41436618  | C/G | 0.124 | 0.150 | 0.197 | 0.091 | Yes | - |
| 77773021  | A/C | 0.124 | 0.150 | 0.288 | 0.307 | Yes | - |
| 46009151  | C/T | 0.080 | 0.090 | 0.138 | 0.102 | Yes | - |
| 56445587  | A/G | 0.186 | 0.170 | 0.148 | 0.176 | Yes | - |
| 129377916 | A/G | 0.217 | 0.270 | 0.294 | 0.415 | Yes | - |
| 604168    | A/G | 0.150 | 0.170 | 0.132 | 0.210 | Yes | - |
| 58568805  | C/T | 0.354 | 0.320 | 0.178 | 0.195 | Yes | - |
| 163661506 | C/T | 0.128 | 0.130 | 0.235 | 0.205 | Yes | - |
| 8595776   | C/T | 0.332 | 0.360 | 0.521 | 0.523 | Yes | - |
| 122375893 | A/C | 0.482 | 0.480 | 0.528 | 0.545 | Yes | - |
| 137735214 | A/G | 0.208 | 0.220 | 0.317 | 0.244 | Yes | - |
| 49185736  | A/C | 0.248 | 0.220 | 0.234 | 0.029 | Yes | - |
| 17070593  | A/G | 0.381 | 0.370 | 0.538 | 0.609 | Yes | - |
| 52378028  | A/T | 0.460 | 0.400 | 0.412 | 0.267 | Yes | - |
| 5896227   | A/G | 0.093 | 0.060 | 0.101 | 0.023 | Yes | - |
| 11005474  | A/G | 0.491 | 0.490 | 0.430 | 0.364 | Yes | - |
| 171699217 | C/T | 0.358 | 0.366 | 0.176 | 0.125 | Yes | - |
| 31710946  | A/G | 0.301 | 0.353 | 0.203 | 0.271 | Yes | - |
| 61012475  | A/G | 0.332 | 0.356 | 0.378 | 0.307 | Yes | - |
| 240107398 | C/T | 0.420 | 0.478 | 0.436 | 0.443 | Yes | - |
| 5896227   | A/G | 0.093 | 0.069 | 0.101 | 0.023 | Yes | - |
| 11005474  | A/G | 0.491 | 0.492 | 0.430 | 0.364 | Yes | - |
| 87664932  | G/T | 0.385 | 0.405 | 0.389 | 0.392 | Yes | - |
| 5883385   | C/T | 0.212 | 0.210 | 0.217 | 0.222 | Yes | - |
| 116157417 | C/T | 0.960 | NA    | 0.913 | 0.972 | Yes | - |
| 19870653  | A/G | 0.442 | NA    | 0.382 | 0.591 | Yes | - |
| 38487314  | C/T | 0.354 | 0.396 | 0.586 | 0.642 | Yes | - |
| 21693577  | A/G | 0.504 | 0.435 | 0.413 | 0.580 | Yes | - |
| 91362513  | A/G | 0.212 | 0.210 | 0.128 | 0.172 | Yes | - |
| 17275804  | A/C | 0.553 | 0.487 | 0.547 | 0.619 | Yes | - |
| 73672444  | A/G | 0.248 | 0.216 | 0.198 | 0.153 | Yes | - |
| 18317580  | C/G | 0.288 | 0.188 | 0.176 | 0.205 | Yes | - |
| 99327507  | A/G | 0.049 | 0.045 | 0.003 | 0.011 | Yes | - |
| 61327359  | C/T | 0.344 | 0.320 | 0.279 | 0.098 | Yes | - |
| 17352450  | A/G | 0.100 | 0.091 | 0.145 | 0.006 | Yes | - |
| 119644998 | A/G | 0.234 | 0.252 | 0.297 | 0.188 | Yes | - |
| 111554179 | G/T | 0.204 | 0.207 | 0.341 | 0.341 | Yes | - |
| 75879263  | C/T | 0.310 | 0.304 | 0.268 | 0.216 | Yes | - |
| 211325139 | A/G | 0.181 | 0.177 | 0.167 | 0.165 | Yes | - |
| 18281722  | C/T | 0.558 | 0.525 | 0.359 | 0.409 | Yes | - |
| 5128036   | A/G | 0.164 | 0.175 | 0.094 | 0.176 | Yes | - |
| 119873345 | A/C | 0.363 | 0.450 | 0.356 | 0.420 | Yes | - |
| 61209825  | C/T | 0.545 | 0.467 | 0.424 | 0.253 | Yes | - |
| 55151605  | A/G | 0.186 | 0.187 | 0.193 | 0.182 | Yes | - |
| 131693277 | A/G | 0.376 | 0.370 | 0.528 | 0.648 | Yes | - |
| 157945440 | C/T | 0.341 | 0.360 | 0.255 | 0.386 | Yes | - |
| 21269288  | A/G | 0.164 | 0.205 | 0.174 | 0.057 | Yes | - |
| 187394452 | G/T | 0.500 | 0.492 | 0.528 | 0.602 | Yes | - |
| 58917190  | A/G | 0.500 | 0.465 | 0.393 | 0.619 | Yes | - |
| 9565177   | C/T | 0.181 | 0.193 | 0.149 | 0.131 | Yes | - |
| 120059099 | A/G | 0.336 | 0.313 | 0.276 | 0.170 | Yes | - |
| 86173848  | A/G | 0.075 | 0.106 | 0.055 | 0.119 | Yes | - |
| 53900822  | C/T | 0.571 | 0.464 | 0.412 | 0.233 | Yes | - |
| 169471394 | C/T | 0.326 | 0.310 | 0.224 | 0.165 | Yes | - |
| 102065469 | A/G | 0.199 | 0.189 | 0.332 | 0.500 | Yes | - |
| 135133263 | A/G | 0.367 | 0.335 | 0.451 | 0.402 | Yes | - |
| 66883701  | A/C | 0.283 | 0.266 | 0.237 | 0.352 | Yes | - |

|           |     |       |       |       |       |     |   |
|-----------|-----|-------|-------|-------|-------|-----|---|
| 145211510 | C/G | 0.075 | 0.083 | 0.125 | 0.029 | Yes | - |
| 160484466 | C/G | 0.199 | 0.163 | 0.067 | 0.125 | Yes | - |
| 21091049  | A/G | 0.205 | 0.270 | 0.295 | 0.523 | Yes | - |
| 61119570  | A/G | 0.159 | 0.147 | 0.121 | 0.109 | Yes | - |
| 111853776 | C/G | 0.394 | 0.401 | 0.434 | 0.438 | Yes | - |
| 27594741  | C/T | 0.394 | 0.399 | 0.489 | 0.188 | Yes | - |
| 159850267 | C/T | 0.305 | 0.304 | 0.143 | 0.352 | Yes | - |
| 234333309 | C/T | 0.314 | 0.337 | 0.297 | 0.425 | Yes | - |
| 47176773  | C/T | 0.150 | 0.135 | 0.076 | 0.273 | Yes | - |
| 11150895  | A/G | 0.252 | 0.242 | 0.266 | 0.273 | Yes | - |
| 60135112  | C/G | 0.491 | 0.490 | 0.399 | 0.494 | Yes | - |
| 33672351  | A/G | 0.619 | 0.338 | 0.538 | 0.477 | Yes | - |
| 89749663  | C/T | 0.407 | 0.620 | 0.345 | 0.330 | Yes | - |
| 25512748  | A/C | 0.752 | 0.790 | 0.886 | 0.795 | Yes | - |
| 16409375  | A/G | 0.296 | 0.300 | 0.262 | 0.278 | Yes | - |
| 10275699  | C/T | 0.336 | 0.270 | 0.355 | 0.278 | Yes | - |
| 158851472 | A/G | 0.208 | 0.220 | 0.114 | 0.148 | Yes | - |
| 121024374 | A/G | 0.721 | 0.770 | 0.840 | 0.773 | Yes | - |
| 101180107 | A/G | 0.292 | NA    | 0.210 | 0.153 | Yes | - |
| 43212565  | A/C | 0.748 | NA    | 0.819 | 0.932 | Yes | - |
| 6142018   | C/T | 0.827 | 0.850 | 0.838 | 0.892 | Yes | - |
| 6142018   | C/T | 0.827 | 0.850 | 0.838 | 0.892 | Yes | - |
| 28054089  | C/T | 0.468 | 0.480 | 0.454 | 0.385 | Yes | - |
| 112381672 | C/T | 0.735 | NA    | 0.775 | 0.506 | Yes | - |
| 6139051   | C/T | 0.748 | 0.730 | 0.755 | 0.818 | Yes | - |
| 6139051   | C/T | 0.748 | 0.760 | 0.755 | 0.818 | Yes | - |
| 87557442  | A/C | 0.932 | NA    | 0.938 | 0.948 | Yes | - |
| 20461125  | G/T | 0.527 | NA    | 0.654 | 0.494 | Yes | - |
| 75075310  | C/T | 0.704 | NA    | 0.794 | 0.759 | Yes | - |
| 43134055  | A/G | 0.319 | NA    | 0.229 | 0.443 | Yes | - |
| 158692478 | A/G | 0.562 | 0.520 | 0.629 | 0.580 | Yes | - |
| 158692478 | A/G | 0.562 | NA    | 0.629 | 0.580 | Yes | - |
| 1013553   | A/G | 0.181 | NA    | 0.259 | 0.301 | Yes | - |
| 53906282  | C/T | 0.358 | NA    | 0.540 | 0.443 | Yes | - |
| 32444165  | C/T | 0.196 | NA    | 0.072 | 0.046 | Yes | - |
| 32509195  | C/T | 0.628 | 0.130 | 0.667 | 0.631 | Yes | - |
| 148920397 | A/G | 0.765 | NA    | 0.711 | 0.756 | Yes | - |
| 176717118 | A/G | 0.308 | NA    | 0.333 | 0.239 | Yes | - |
| 11156830  | A/G | 0.397 | 0.370 | 0.378 | 0.253 | Yes | - |
| 93076191  | C/T | 0.283 | 0.280 | 0.151 | 0.153 | Yes | - |
| 93076191  | C/T | 0.283 | 0.290 | 0.151 | 0.153 | Yes | - |
| 43179074  | A/G | 0.450 | 0.480 | 0.400 | 0.534 | Yes | - |
| 35910332  | C/T | 0.757 | 0.750 | 0.788 | 0.869 | Yes | - |
| 35910332  | C/T | 0.757 | 0.750 | 0.788 | 0.869 | Yes | - |
| 56449006  | A/G | 0.664 | 0.670 | 0.546 | 0.489 | Yes | - |
| 37767727  | A/G | 0.451 | 0.410 | 0.402 | 0.500 | Yes | - |
| 133474474 | C/T | 0.897 | NA    | 0.712 | 0.739 | Yes | - |
| 75791233  | A/C | 0.235 | 0.200 | 0.190 | 0.159 | Yes | - |
| 43123835  | C/T | 0.504 | 0.500 | 0.592 | 0.381 | Yes | - |
| 123279458 | A/G | 0.902 | NA    | 0.867 | 0.898 | Yes | - |
| 107069404 | C/T | 0.792 | 0.826 | 0.837 | 0.756 | Yes | - |
| 55268627  | C/T | 0.836 | 0.810 | 0.903 | 0.955 | Yes | - |
| 11024601  | G/T | 0.743 | 0.750 | 0.681 | 0.761 | Yes | - |
| 13035530  | C/G | 0.633 | 0.650 | 0.631 | 0.858 | Yes | - |
| 44095830  | C/T | 0.854 | 0.840 | 0.808 | 0.699 | Yes | - |
| 220890152 | A/C | 0.732 | 0.720 | 0.710 | 0.665 | Yes | - |
| 22088574  | A/G | 0.460 | 0.560 | 0.566 | 0.477 | Yes | - |
| 203454130 | C/T | 0.159 | 0.140 | 0.056 | 0.011 | Yes | - |
| 11222945  | C/T | 0.410 | 0.260 | 0.504 | 0.483 | Yes | - |
| 22072524  | G/T | 0.146 | 0.150 | 0.201 | 0.136 | Yes | - |
| 22072524  | G/T | 0.146 | 0.140 | 0.201 | 0.136 | Yes | - |
| 49364219  | C/T | 0.049 | 0.170 | 0.074 | 0.201 | Yes | - |
| 48472377  | A/G | 0.186 | 0.150 | 0.238 | 0.381 | Yes | - |
| 22233943  | C/T | 0.425 | 0.460 | 0.299 | 0.586 | Yes | - |
| 5790746   | A/G | 0.106 | 0.110 | 0.288 | 0.161 | Yes | - |
| 5790746   | A/G | 0.106 | 0.110 | 0.288 | 0.161 | Yes | - |
| 5790746   | A/G | 0.106 | 0.110 | 0.288 | 0.161 | Yes | - |
| 5790746   | A/G | 0.106 | 0.110 | 0.288 | 0.161 | Yes | - |
| 119888107 | A/G | 0.469 | 0.450 | 0.493 | 0.551 | Yes | - |
| 39302119  | C/T | 0.478 | 0.400 | 0.344 | 0.136 | Yes | - |
| 68310957  | A/G | 0.351 | 0.340 | 0.357 | 0.488 | Yes | - |
| 99369946  | A/G | 0.381 | 0.300 | 0.392 | 0.182 | Yes | - |
| 24180057  | C/T | 0.345 | 0.340 | 0.447 | 0.307 | Yes | - |
| 3627809   | C/T | 0.314 | 0.310 | 0.181 | 0.131 | Yes | - |
| 28176450  | C/T | 0.071 | 0.060 | 0.236 | 0.216 | Yes | - |
| 177617841 | C/T | 0.469 | 0.410 | 0.507 | 0.443 | Yes | - |

|           |     |       |         |       |       |     |                |
|-----------|-----|-------|---------|-------|-------|-----|----------------|
| 14275899  | A/G | 0.597 | 0.490   | 0.388 | 0.216 | Yes | -              |
| 43592990  | C/T | 0.288 | 0.380   | 0.469 | 0.460 | Yes | -              |
| 10889028  | A/G | 0.304 | NA      | 0.375 | 0.364 | Yes | -              |
| 39095398  | C/T | 0.376 | NA      | 0.292 | 0.125 | Yes | -              |
| 7032911   | C/T | 0.938 | 0.780   | 0.965 | 0.936 | Yes | -              |
| 196339663 | A/G | 0.788 | 0.440   | 0.809 | 0.636 | Yes | -              |
| 5848167   | A/T | 0.832 | 0.070   | 0.747 | 0.812 | Yes | -              |
| 51970616  | G/T | 0.170 | 0.160   | 0.159 | 0.068 | Yes | -              |
| 52128237  | G/T | 0.509 | 0.420   | 0.378 | 0.381 | Yes | -              |
| 208055893 | A/G | 0.223 | NA      | 0.138 | 0.250 | Yes | -              |
| 16339957  | C/T | 0.908 | 0.910   | 0.959 | 0.989 | Yes | -              |
| 52358455  | C/T | 0.460 | 0.400   | 0.392 | 0.278 | No  | D to rs9939609 |
| 56002077  | C/T | 0.265 | 0.180   | 0.196 | 0.301 | No  | Duplicated     |
| 78316542  | G/T | 0.770 | 0.800   | 0.889 | 0.955 | Yes | -              |
| 27519958  | G/T | 0.754 | 0.750   | 0.672 | 0.739 | No  | LD to rs6265   |
| 52366748  | A/G | 0.482 | 0.410   | 0.441 | 0.341 | No  | D to rs9939609 |
| 16383493  | C/T | 0.142 | 0.150   | 0.202 | 0.131 | Yes | -              |
| 71762246  | A/G | 0.022 | NA      | 0.000 | 0.000 | Yes | -              |
| 50944238  | A/G | 0.155 | NA      | 0.179 | 0.307 | No  | LD to rs987237 |
| 96693552  | C/G | 0.192 | NA      | 0.203 | 0.153 | Yes | -              |
| 52382989  | C/T | 0.473 | 0.430   | 0.406 | 0.324 | No  | D to rs9939609 |
| 16346170  | C/T | 0.208 | 0.230   | 0.206 | 0.210 | Yes | -              |
| 16360087  | C/T | 0.124 | 0.120   | 0.052 | 0.017 | Yes | -              |
| 52387966  | A/G | 0.518 | 0.540   | 0.563 | 0.352 | No  | Duplicated     |
| 52387966  | A/G | 0.518 | 0.540   | 0.563 | 0.352 | No  | Duplicated     |
| 52387966  | A/G | 0.518 | 0.540   | 0.563 | 0.352 | Yes | -              |
| 50015791  | C/G | 0.261 | 0.280   | 0.255 | 0.170 | Yes | -              |
| 69670887  | C/T | 0.208 | 0.220   | 0.280 | 0.216 | Yes | -              |
| 88967613  | A/G | 0.531 | NA      | 0.529 | 0.341 | Yes | -              |
| 141078528 | A/C | 0.965 | NA      | 0.979 | 0.954 | Yes | -              |
| 60142628  | C/T | 0.621 | NA      | 0.416 | 0.483 | Yes | -              |
| 35009004  | C/T | 0.633 | NA      | 0.598 | 0.665 | Yes | -              |
| 106725656 | A/C | 0.217 | 0.230   | 0.169 | 0.167 | Yes | -              |
| 96788538  | C/T | 0.159 | 0.120   | 0.262 | 0.301 | Yes | -              |
| 125946047 | A/G | 0.093 | 0.050   | 0.147 | 0.136 | Yes | -              |
| 65293837  | A/T | 0.272 | 0.230   | 0.124 | 0.102 | Yes | -              |
| 101035289 | A/G | 0.363 | 0.330   | 0.303 | 0.233 | Yes | -              |
| 20192656  | G/T | 0.409 | 0.390   | 0.343 | 0.378 | Yes | -              |
| 156879172 | A/T | 0.319 | NA      | 0.298 | 0.188 | Yes | -              |
| 129613131 | A/G | 0.875 | NA      | 0.873 | 0.943 | Yes | -              |
| 13195732  | C/T | 0.535 | 0.530   | 0.532 | 0.494 | Yes | -              |
| 58211715  | A/G | 0.403 | 0.380   | 0.321 | 0.455 | Yes | -              |
| 4416631   | A/C | 0.297 | NA      | 0.258 | 0.267 | Yes | -              |
| 120268934 | A/T | 0.522 | 0.370   | 0.623 | 0.705 | Yes | -              |
| 104745389 | C/T | 0.111 | 0.100   | 0.264 | 0.051 | Yes | -              |
| 39430746  | A/C | 1.000 | NA      | 0.997 | 0.943 | Yes | -              |
| 236974976 | C/G | 0.818 | 0.170   | 0.365 | 0.000 | Yes | -              |
| 29639608  | C/T | 0.509 | NA      | 0.538 | 0.352 | Yes | -              |
| 198274055 | A/G | 0.788 | 0.760   | 0.787 | 0.517 | Yes | -              |
| 1375087   | C/T | 0.434 | 0.450   | 0.299 | 0.210 | Yes | -              |
| 156239194 | A/G | 0.348 | NA      | 0.301 | 0.443 | Yes | -              |
| 47308233  | A/G | 0.354 | 0.230   | 0.366 | 0.341 | Yes | -              |
| 38588460  | A/G | 0.442 | 0.450   | 0.610 | 0.733 | Yes | -              |
| 69198729  | G/T | 0.586 | NA      | 0.596 | 0.494 | Yes | -              |
| 72806847  | C/G | 0.735 | 0.430   | 0.635 | 0.702 | Yes | -              |
| 179726814 | A/G | 0.143 | NA      | 0.294 | 0.261 | Yes | -              |
| 28680768  | A/G | 0.353 | 0.360   | 0.304 | 0.500 | Yes | -              |
| 69577214  | C/T | 0.195 | NA      | 0.167 | 0.295 | Yes | -              |
| 842313    | C/T | 0.111 | 0.090   | 0.145 | 0.222 | Yes | -              |
| 137669543 | C/G | 0.571 | 0.380   | 0.674 | 0.727 | Yes | -              |
| 20939614  | C/T | 0.385 | NonEuro | 0.486 | 0.364 | Yes | -              |
| 39812564  | A/C | 0.566 | 0.530   | 0.434 | 0.477 | Yes | -              |
| 61502867  | A/C | 0.664 | NA      | 0.601 | 0.347 | Yes | -              |
| 11184012  | G/T | 0.562 | NA      | 0.556 | 0.408 | Yes | -              |
| 11184012  | G/T | 0.562 | NA      | 0.556 | 0.408 | Yes | -              |
| 60978057  | C/T | 0.973 | NA      | 0.993 | 0.000 | Yes | -              |
| 61327359  | C/T | 0.656 | NA      | 0.721 | 0.902 | Yes | -              |
| 61327359  | C/T | 0.656 | NA      | 0.721 | 0.902 | Yes | -              |
| 11103001  | C/G | 0.447 | NA      | 0.438 | 0.597 | Yes | -              |
| 11090959  | C/T | 0.549 | NA      | 0.507 | 0.341 | Yes | -              |
| 61320875  | G/T | 0.372 | NA      | 0.264 | 0.102 | Yes | -              |
| 61320875  | G/T | 0.372 | NA      | 0.264 | 0.102 | Yes | -              |
| 61320875  | G/T | 0.372 | NA      | 0.264 | 0.102 | Yes | -              |
| 11182333  | C/T | 0.442 | NA      | 0.510 | 0.667 | Yes | -              |
| 27594741  | C/T | 0.394 | NA      | 0.489 | 0.188 | Yes | -              |
| 102858088 | C/T | 0.973 | NA      | 0.926 | 0.925 | Yes | -              |

|           |     |       |       |       |       |     |   |
|-----------|-----|-------|-------|-------|-------|-----|---|
| 2507306   | A/G | 0.195 | 0.167 | 0.221 | 0.261 | Yes | - |
| 13143291  | A/G | 0.412 | 0.459 | 0.532 | 0.489 | Yes | - |
| 30908917  | C/T | 0.097 | NA    | 0.215 | 0.222 | Yes | - |
| 135915484 | G/T | 0.195 | NA    | 0.223 | 0.000 | Yes | - |
| 62970854  | A/G | 0.113 | NA    | 0.173 | 0.184 | Yes | - |
| 50432611  | C/T | 0.726 | NA    | 0.591 | 0.614 | Yes | - |
| 76082695  | C/T | 0.947 | NA    | 0.976 | 0.983 | Yes | - |
| 131847820 | A/C | 0.465 | NA    | 0.426 | 0.653 | Yes | - |
| 102636538 | C/T | 0.171 | NA    | 0.349 | 0.239 | Yes | - |
| 33082992  | C/T | 0.434 | NA    | 0.267 | 0.392 | Yes | - |
| 61320875  | G/T | 0.372 | NA    | 0.264 | 0.102 | Yes | - |
| 25656267  | A/G | 0.571 | NA    | 0.497 | 0.551 | Yes | - |
| 118605116 | C/G | 0.076 | NA    | 0.188 | 0.330 | Yes | - |
| 24838622  | C/T | 0.442 | NA    | 0.464 | 0.358 | Yes | - |
| 6161354   | A/G | 0.597 | NA    | 0.656 | 0.790 | Yes | - |
| 18286416  | A/G | 0.823 | NA    | 0.703 | 0.739 | Yes | - |
| 120849966 | C/T | 0.893 | NA    | 0.962 | 0.983 | Yes | - |
| 125486599 | A/G | 0.058 | 0.090 | 0.041 | 0.085 | Yes | - |
| 43575012  | C/T | 0.434 | 0.710 | 0.221 | 0.312 | Yes | - |
| 48831663  | A/G | 0.951 | 0.760 | 0.934 | 0.881 | Yes | - |
| 43492342  | A/C | 0.907 | 0.910 | 0.732 | 0.875 | Yes | - |
| 125565033 | A/G | 0.296 | 0.220 | 0.272 | 0.290 | Yes | - |
| 66625504  | C/T | 0.429 | 0.390 | 0.266 | 0.205 | Yes | - |
| 172412942 | C/T | 0.389 | 0.400 | 0.583 | 0.597 | Yes | - |
| 75587267  | A/G | 0.336 | 0.320 | 0.173 | 0.176 | Yes | - |
| 128404702 | A/G | 0.124 | 0.110 | 0.148 | 0.159 | Yes | - |
| 11095284  | A/G | 0.710 | 0.680 | 0.735 | 0.523 | Yes | - |
| 120702624 | A/G | 0.850 | 0.800 | 0.879 | 0.830 | Yes | - |
| 67594965  | A/G | 0.261 | 0.232 | 0.324 | 0.233 | Yes | - |
| 67594965  | A/G | 0.261 | 0.240 | 0.324 | 0.233 | Yes | - |
| 161228557 | C/T | 0.593 | 0.570 | 0.725 | 0.790 | Yes | - |
| 103770651 | A/G | 0.544 | 0.520 | 0.374 | 0.443 | Yes | - |
| 35175785  | A/G | 0.487 | 0.450 | 0.458 | 0.341 | Yes | - |
| 35229995  | C/T | 0.513 | 0.510 | 0.490 | 0.369 | Yes | - |
| 64069645  | C/T | 0.611 | 0.270 | 0.690 | 0.807 | Yes | - |
| 67858677  | C/T | 0.629 | 0.380 | 0.613 | 0.670 | Yes | - |
| 43972018  | A/G | 0.799 | 0.220 | 0.849 | 0.864 | Yes | - |
| 64069645  | C/T | 0.611 | 0.270 | 0.690 | 0.807 | Yes | - |
| 2209453   | C/T | 0.398 | 0.450 | 0.559 | 0.705 | Yes | - |
| 129521063 | A/C | 0.239 | 0.280 | 0.338 | 0.483 | Yes | - |
| 128164338 | A/G | 0.699 | NA    | 0.551 | 0.500 | Yes | - |
| 23582408  | C/T | 0.420 | 0.450 | 0.570 | 0.443 | Yes | - |
| 128194098 | A/C | 0.031 | 0.040 | 0.024 | 0.131 | Yes | - |
| 128194098 | A/C | 0.031 | 0.030 | 0.024 | 0.131 | Yes | - |
| 95781900  | C/T | 0.646 | 0.650 | 0.778 | 0.795 | Yes | - |
| 87256014  | A/G | 0.504 | NA    | 0.585 | 0.659 | Yes | - |
| 41644405  | C/T | 0.274 | 0.410 | 0.288 | 0.324 | Yes | - |
| 51194977  | C/T | 0.580 | NA    | 0.528 | 0.386 | Yes | - |
| 117316745 | C/T | 0.637 | 0.370 | 0.641 | 0.591 | Yes | - |
| 128586755 | A/G | 0.071 | 0.120 | 0.113 | 0.136 | Yes | - |
| 128587736 | A/C | 0.071 | NA    | 0.108 | 0.136 | Yes | - |
| 128587736 | A/C | 0.929 | NA    | 0.892 | 0.864 | Yes | - |
| 128587736 | A/C | 0.071 | 0.090 | 0.108 | 0.136 | Yes | - |
| 41830156  | G/T | 0.451 | 0.530 | 0.587 | 0.460 | Yes | - |
| 160501364 | A/G | 0.655 | NA    | 0.590 | 0.570 | Yes | - |
| 160501364 | A/G | 0.345 | NA    | 0.410 | 0.430 | Yes | - |
| 128482487 | G/T | 0.487 | NA    | 0.529 | 0.506 | Yes | - |
| 128482487 | G/T | 0.487 | 0.490 | 0.529 | 0.506 | Yes | - |
| 128482487 | G/T | 0.487 | 0.530 | 0.529 | 0.506 | Yes | - |
| 128482487 | G/T | 0.487 | 0.500 | 0.529 | 0.506 | Yes | - |
| 68752534  | A/G | 0.190 | NA    | 0.106 | 0.064 | Yes | - |
| 68752534  | A/G | 0.190 | NA    | 0.106 | 0.064 | Yes | - |
| 41848219  | A/G | 0.881 | NA    | 0.828 | 0.864 | Yes | - |
| 87324187  | C/T | 0.330 | NA    | 0.342 | 0.369 | Yes | - |
| 51560171  | A/G | 0.142 | 0.170 | 0.028 | 0.000 | Yes | - |
| 33194048  | C/T | 0.212 | 0.230 | 0.297 | 0.250 | Yes | - |
| 33228215  | A/G | 0.097 | 0.100 | 0.179 | 0.148 | Yes | - |
| 134765855 | C/T | 0.500 | 0.480 | 0.476 | 0.597 | Yes | - |
| 31360904  | C/T | 0.133 | 0.150 | 0.156 | 0.312 | Yes | - |
| 162968937 | C/T | 0.805 | 0.860 | 0.897 | 0.949 | Yes | - |
| 150458511 | A/G | 0.080 | 0.054 | 0.077 | 0.110 | Yes | - |
| 132023863 | A/G | 0.783 | 0.790 | 0.684 | 0.790 | Yes | - |
| 158650367 | A/G | 0.805 | 0.800 | 0.726 | 0.665 | Yes | - |
| 67466790  | A/G | 0.296 | 0.300 | 0.374 | 0.614 | Yes | - |
| 158692478 | A/G | 0.562 | 0.560 | 0.629 | 0.580 | Yes | - |
| 158683347 | C/T | 0.190 | 0.450 | 0.288 | 0.330 | Yes | - |

|           |     |       |         |       |       |     |                |
|-----------|-----|-------|---------|-------|-------|-----|----------------|
| 23130802  | A/G | 0.323 | 0.350   | 0.287 | 0.477 | Yes | -              |
| 60935046  | C/T | 0.571 | 0.560   | 0.628 | 0.773 | Yes | -              |
| 227270383 | A/G | 0.372 | NA      | 0.299 | 0.352 | Yes | -              |
| 76746239  | A/G | 0.513 | NA      | 0.407 | 0.557 | Yes | -              |
| 95062456  | C/T | 0.531 | 0.550   | 0.601 | 0.636 | Yes | -              |
| 52230790  | A/G | 0.717 | NA      | 0.773 | 0.659 | Yes | -              |
| 22125717  | C/T | 0.495 | NA      | 0.743 | 0.511 | Yes | -              |
| 145705188 | C/T | 0.389 | 0.400   | 0.483 | 0.472 | Yes | -              |
| 15843619  | C/T | 0.292 | NA      | 0.392 | 0.295 | Yes | -              |
| 109374743 | C/T | 0.159 | 0.180   | 0.145 | 0.148 | Yes | -              |
| 109374743 | C/T | 0.159 | 0.180   | 0.145 | 0.148 | Yes | -              |
| 31676448  | A/G | 0.821 | 0.810   | 0.870 | 0.886 | Yes | -              |
| 150612560 | A/G | 0.040 | NA      | 0.041 | 0.045 | Yes | -              |
| 147826008 | A/C | 0.372 | 0.410   | 0.438 | 0.352 | Yes | -              |
| 19757396  | A/G | 0.748 | NA      | 0.821 | 0.879 | Yes | -              |
| 12317998  | C/T | 0.460 | 0.520   | 0.507 | 0.472 | Yes | -              |
| 12317998  | C/T | 0.460 | 0.520   | 0.507 | 0.472 | Yes | -              |
| 145679680 | A/G | 0.385 | 0.390   | 0.490 | 0.477 | Yes | -              |
| 37043379  | A/G | 0.071 | 0.070   | 0.080 | 0.040 | Yes | -              |
| 118551703 | A/G | 0.111 | 0.090   | 0.151 | 0.193 | Yes | -              |
| 160477234 | C/T | 0.257 | 0.330   | 0.420 | 0.477 | Yes | -              |
| 149194052 | C/T | 0.133 | 0.210   | 0.166 | 0.267 | Yes | -              |
| 119720641 | C/T | 0.164 | 0.360   | 0.190 | 0.290 | Yes | -              |
| 41445133  | A/G | 0.027 | 0.070   | 0.017 | 0.000 | Yes | -              |
| 22851382  | A/G | 0.375 | 0.250   | 0.239 | 0.295 | Yes | -              |
| 17037897  | A/G | 0.951 | 0.430   | 0.859 | 0.847 | Yes | -              |
| 80783532  | A/G | 0.283 | 0.230   | 0.236 | 0.125 | Yes | -              |
| 2752805   | C/T | 0.248 | 0.350   | 0.276 | 0.324 | Yes | -              |
| 144145078 | C/G | 0.097 | NonEuro | 0.162 | 0.949 | Yes | -              |
| 112464039 | C/G | 0.031 | 0.160   | 0.021 | 0.134 | Yes | -              |
| 8965501   | A/G | 0.190 | 0.320   | 0.203 | 0.335 | Yes | -              |
| 137807930 | A/G | 0.845 | NonEuro | 0.688 | 0.648 | Yes | -              |
| 160741985 | C/T | 0.199 | NonEuro | 0.114 | 0.562 | Yes | -              |
| 24101280  | A/C | 0.836 | NonEuro | 0.827 | 0.165 | Yes | -              |
| 156783057 | A/C | 0.261 | 0.230   | 0.370 | 0.471 | Yes | -              |
| 171008832 | A/G | 0.692 | 0.060   | 0.736 | 0.000 | Yes | -              |
| 74691482  | C/T | 0.394 | 0.390   | 0.400 | 0.591 | Yes | -              |
| 74691482  | C/T | 0.394 | 0.390   | 0.400 | 0.591 | Yes | -              |
| 50114786  | A/G | 0.183 | 0.210   | 0.235 | 0.057 | Yes | -              |
| 50114786  | A/G | 0.183 | 0.210   | 0.235 | 0.057 | Yes | -              |
| 50114786  | A/G | 0.183 | 0.210   | 0.235 | 0.057 | Yes | -              |
| 44893730  | A/G | 0.690 | NonEuro | 0.451 | 0.290 | Yes | -              |
| 3882090   | C/T | 0.155 | 0.200   | 0.229 | 0.256 | Yes | -              |
| 180159279 | A/C | 0.898 | 0.470   | 0.587 | 0.812 | Yes | -              |
| 1666531   | G/T | 0.022 | NonEuro | 0.052 | 0.966 | No  | Duplicated     |
| 1666531   | G/T | 0.022 | NonEuro | 0.052 | 0.966 | Yes | -              |
| 98846495  | A/G | 0.168 | 0.080   | 0.103 | 0.080 | Yes | -              |
| 18770374  | C/T | 0.652 | 0.490   | 0.645 | 0.741 | Yes | -              |
| 116189238 | C/T | 0.099 | NonEuro | 0.214 | 0.347 | No  | LD to rs964184 |
| 24101018  | A/G | 0.500 | 0.350   | 0.368 | 0.591 | Yes | -              |
| 15759627  | C/G | 0.000 | 0.040   | 0.000 | 0.000 | Yes | -              |
| 77587871  | A/G | 0.420 | 0.440   | 0.317 | 0.126 | Yes | -              |
| 93668766  | A/G | 0.071 | 0.100   | 0.045 | 0.097 | Yes | -              |
| 31739378  | A/G | 0.296 | 0.280   | 0.315 | 0.335 | Yes | -              |
| 130258203 | A/G | 0.447 | 0.460   | 0.537 | 0.625 | Yes | -              |
| 33301097  | G/T | 0.049 | 0.110   | 0.118 | 0.148 | Yes | -              |
| 49655116  | C/T | 0.071 | 0.060   | 0.100 | 0.040 | Yes | -              |
| 131410181 | C/T | 0.128 | 0.170   | 0.152 | 0.057 | Yes | -              |
| 28375930  | A/G | 0.527 | 0.420   | 0.438 | 0.341 | Yes | -              |
| 36311958  | A/C | 0.022 | 0.070   | 0.021 | 0.046 | Yes | -              |
| 67827391  | G/T | 0.080 | 0.080   | 0.034 | 0.051 | Yes | -              |
| 14315503  | C/G | 0.996 | 0.030   | 1.000 | 0.000 | Yes | -              |
| 77881227  | A/G | 0.000 | 0.020   | 0.000 | 0.000 | Yes | -              |
| 85237749  | A/G | 0.023 | 0.030   | 0.023 | 0.000 | Yes | -              |
| 128573679 | C/T | 0.615 | 0.010   | 0.659 | 0.609 | Yes | -              |
| 8269328   | C/T | 0.000 | 0.020   | 0.007 | 0.000 | Yes | -              |
| 157961271 | A/G | 0.000 | 0.020   | 0.000 | 0.000 | Yes | -              |
| 45706455  | C/T | 0.496 | 0.490   | 0.410 | 0.301 | Yes | -              |
| 12725860  | C/G | 1.000 | 0.010   | 1.000 | 0.000 | Yes | -              |
| 47691408  | A/G | 0.987 | 0.390   | 1.000 | 0.000 | Yes | -              |
| 12731633  | C/T | 0.000 | 0.110   | 0.000 | 0.000 | Yes | -              |
| 67830292  | C/T | 0.062 | 0.060   | 0.024 | 0.017 | Yes | -              |
| 147477    | A/G | 0.000 | 0.030   | 0.000 | 0.000 | Yes | -              |
| 84066369  | A/G | 0.000 | 0.010   | 0.000 | 0.000 | Yes | -              |
| 94483919  | A/G | 0.004 | 0.040   | 0.024 | 0.017 | Yes | -              |
| 47727138  | C/T | 0.013 | 0.060   | 0.021 | 0.029 | Yes | -              |

|           |     |       |       |       |       |     |   |
|-----------|-----|-------|-------|-------|-------|-----|---|
| 35467431  | C/T | 0.073 | NA    | 0.141 | 0.188 | Yes | - |
| 8554259   | A/G | 0.292 | NA    | 0.374 | 0.159 | Yes | - |
| 154155469 | G/T | 0.456 | NA    | 0.407 | 0.460 | Yes | - |
| 164026122 | C/T | 0.341 | NA    | 0.310 | 0.171 | Yes | - |
| 52209698  | C/T | 0.049 | NA    | 0.076 | 0.080 | Yes | - |
| 1480997   | A/G | 0.319 | NA    | 0.328 | 0.335 | Yes | - |
| 3133123   | A/T | 0.929 | 0.850 | 0.947 | 0.874 | Yes | - |
| 3133123   | A/T | 0.071 | 0.150 | 0.053 | 0.126 | Yes | - |
| 3135733   | C/T | 0.929 | 0.830 | 0.945 | 0.881 | Yes | - |
| 3135733   | C/T | 0.071 | 0.170 | 0.055 | 0.119 | Yes | - |
| 44435005  | G/T | 0.150 | 0.083 | 0.340 | 0.182 | Yes | - |
| 44435005  | G/T | 0.150 | NA    | 0.340 | 0.182 | Yes | - |
| 44435005  | G/T | 0.150 | 0.120 | 0.340 | 0.182 | Yes | - |
| 169766833 | C/T | 0.000 | NA    | 0.003 | 0.000 | Yes | - |
| 90246877  | C/T | 1.000 | NA    | 0.990 | 0.903 | Yes | - |
| 33182637  | C/T | 0.637 | NA    | 0.547 | 0.614 | Yes | - |
| 83809105  | G/T | 0.035 | NA    | 0.031 | 0.000 | Yes | - |
| 182164239 | C/T | 0.257 | NA    | 0.135 | 0.176 | Yes | - |
| 107788371 | A/C | 0.535 | 0.440 | 0.591 | 0.648 | Yes | - |
| 107788371 | A/C | 0.465 | 0.440 | 0.409 | 0.352 | Yes | - |
| 165285410 | C/G | 0.128 | 0.090 | 0.097 | 0.125 | Yes | - |
| 84938685  | C/G | 0.208 | 0.230 | 0.352 | 0.301 | Yes | - |
| 188582362 | A/G | 0.351 | 0.400 | 0.414 | 0.369 | Yes | - |
| 121901118 | C/T | 0.239 | 0.250 | 0.069 | 0.085 | Yes | - |
| 61366326  | C/T | 0.350 | 0.340 | 0.302 | 0.097 | Yes | - |
| 21222816  | C/T | 0.150 | 0.130 | 0.146 | 0.023 | Yes | - |
| 94790431  | A/T | 0.198 | 0.240 | 0.250 | 0.291 | Yes | - |
| 164106667 | A/G | 0.336 | 0.320 | 0.383 | 0.295 | Yes | - |
| 87904968  | G/T | 0.199 | 0.210 | 0.215 | 0.190 | Yes | - |
| 200730199 | C/T | 0.044 | NA    | 0.060 | 0.045 | Yes | - |
| 142929173 | C/T | 0.062 | NA    | 0.083 | 0.182 | Yes | - |
| 36173377  | A/G | 0.004 | NA    | 0.010 | 0.023 | Yes | - |
| 122890613 | A/C | 0.009 | NA    | 0.007 | 0.017 | Yes | - |
| 155971493 | C/T | 0.013 | NA    | 0.097 | 0.062 | Yes | - |
| 17428149  | C/T | 0.000 | NA    | 0.003 | 0.000 | Yes | - |
| 37232877  | C/T | 0.036 | NA    | 0.125 | 0.085 | Yes | - |
| 45642012  | G/T | 0.000 | NA    | 0.035 | 0.092 | Yes | - |
| 14412442  | C/T | 0.000 | NA    | 0.000 | 0.029 | Yes | - |
| 20519095  | C/T | 0.000 | NA    | 0.007 | 0.062 | Yes | - |
| 61327359  | C/T | 0.344 | 0.330 | 0.279 | 0.098 | Yes | - |
| 23046850  | A/G | 0.223 | 0.240 | 0.461 | 0.330 | Yes | - |
| 206195345 | A/G | 0.482 | 0.370 | 0.219 | 0.170 | Yes | - |
| 118680754 | A/G | 0.438 | 0.500 | 0.486 | 0.483 | Yes | - |
| 65823906  | A/G | 0.705 | 0.680 | 0.700 | 0.523 | Yes | - |
| 65823906  | A/G | 0.705 | 0.670 | 0.700 | 0.523 | Yes | - |
| 8836955   | A/G | 0.190 | 0.160 | 0.200 | 0.193 | Yes | - |
| 8836955   | A/G | 0.190 | 0.160 | 0.200 | 0.193 | Yes | - |
| 66634957  | G/T | 0.237 | 0.240 | 0.195 | 0.341 | Yes | - |
| 66634957  | G/T | 0.237 | 0.240 | 0.195 | 0.341 | Yes | - |
| 51182239  | G/T | 0.602 | 0.580 | 0.521 | 0.483 | Yes | - |
| 9251737   | A/G | 0.127 | 0.120 | 0.153 | 0.233 | Yes | - |
| 67923729  | A/G | 0.398 | 0.440 | 0.531 | 0.381 | Yes | - |
| 38473819  | C/T | 0.770 | 0.760 | 0.669 | 0.608 | Yes | - |
| 38473851  | C/T | 0.765 | 0.760 | 0.628 | 0.369 | Yes | - |
| 11141521  | A/G | 0.372 | 0.390 | 0.352 | 0.443 | Yes | - |
| 42709255  | A/G | 0.323 | 0.370 | 0.369 | 0.341 | Yes | - |
| 131020579 | C/T | 0.593 | 0.620 | 0.586 | 0.523 | Yes | - |
| 58531881  | C/T | 0.093 | 0.090 | 0.024 | 0.023 | Yes | - |
| 56254982  | C/G | 0.606 | 0.370 | 0.517 | 0.443 | Yes | - |
| 204402121 | G/T | 0.491 | 0.510 | 0.413 | 0.318 | Yes | - |
| 11381382  | C/T | 0.239 | 0.240 | 0.186 | 0.318 | Yes | - |
| 35294289  | A/G | 0.473 | 0.470 | 0.466 | 0.330 | Yes | - |
| 204447164 | A/G | 0.540 | 0.560 | 0.412 | 0.347 | Yes | - |
| 167452783 | A/G | 0.407 | 0.460 | 0.596 | 0.449 | Yes | - |
| 25026342  | C/T | 0.424 | 0.410 | 0.469 | 0.574 | Yes | - |
| 2543484   | C/T | 0.668 | 0.680 | 0.755 | 0.591 | Yes | - |
| 2543484   | C/T | 0.668 | 0.670 | 0.755 | 0.591 | Yes | - |
| 92084680  | C/G | 0.314 | 0.240 | 0.144 | 0.108 | Yes | - |
| 6433266   | C/G | 0.832 | 0.810 | 0.766 | 0.790 | Yes | - |
| 6433266   | C/G | 0.832 | 0.200 | 0.766 | 0.790 | Yes | - |
| 44181354  | G/T | 0.248 | 0.250 | 0.319 | 0.253 | Yes | - |
| 44181354  | G/T | 0.752 | 0.750 | 0.681 | 0.747 | Yes | - |
| 32771829  | C/T | 0.522 | 0.490 | 0.366 | 0.432 | Yes | - |
| 114105331 | A/C | 0.115 | 0.100 | 0.059 | 0.006 | Yes | - |
| 138048197 | A/G | 0.165 | 0.220 | 0.054 | 0.086 | Yes | - |
| 6138955   | C/T | 0.403 | 0.400 | 0.490 | 0.466 | Yes | - |

|           |     |       |       |       |       |     |   |
|-----------|-----|-------|-------|-------|-------|-----|---|
| 35881553  | A/G | 0.296 | NA    | 0.306 | 0.176 | Yes | - |
| 35881553  | A/G | 0.296 | 0.290 | 0.306 | 0.176 | Yes | - |
| 31730585  | A/C | 0.310 | 0.360 | 0.365 | 0.244 | Yes | - |
| 25717295  | C/G | 0.292 | 0.300 | 0.238 | 0.108 | Yes | - |
| 32537621  | C/T | 0.425 | NA    | 0.191 | 0.312 | Yes | - |
| 65449090  | A/G | 0.442 | 0.490 | 0.621 | 0.299 | Yes | - |
| 65775195  | C/T | 0.367 | 0.360 | 0.352 | 0.443 | Yes | - |
| 25439122  | C/T | 0.102 | 0.060 | 0.045 | 0.012 | Yes | - |
| 25442812  | A/G | 0.069 | 0.040 | 0.038 | 0.011 | Yes | - |
| 211922211 | A/G | 0.150 | 0.170 | 0.098 | 0.114 | Yes | - |
| 73116620  | A/G | 0.128 | 0.140 | 0.114 | 0.097 | Yes | - |
| 77061101  | C/T | 0.239 | 0.270 | 0.228 | 0.148 | Yes | - |
| 242009707 | A/C | 0.173 | 0.210 | 0.217 | 0.188 | Yes | - |
| 130187715 | A/G | 0.321 | 0.300 | 0.333 | 0.364 | Yes | - |
| 166169703 | G/T | 0.243 | 0.141 | 0.129 | 0.159 | Yes | - |
| 118302892 | A/G | 0.889 | 0.910 | 0.917 | 0.898 | Yes | - |
| 104896201 | C/T | 0.925 | 0.910 | 0.745 | 0.722 | Yes | - |
| 124111495 | C/T | 0.823 | 0.830 | 0.854 | 0.875 | Yes | - |
| 185486673 | A/C | 0.604 | 0.590 | 0.526 | 0.716 | Yes | - |
| 101887216 | C/T | 0.385 | NA    | 0.465 | 0.420 | Yes | - |
| 29118712  | C/T | 0.094 | 0.110 | 0.112 | 0.076 | Yes | - |
| 51209236  | C/T | 0.031 | 0.030 | 0.031 | 0.000 | Yes | - |
| 20587707  | C/T | 0.319 | NA    | 0.497 | 0.619 | Yes | - |
| 46758119  | A/G | 0.220 | 0.130 | 0.201 | 0.136 | Yes | - |
| 182033396 | G/T | 0.817 | 0.730 | 0.635 | 0.741 | Yes | - |
| 12969112  | A/T | 0.248 | 0.240 | 0.309 | 0.341 | Yes | - |
| 103192051 | A/G | 0.858 | 0.620 | 0.721 | 0.847 | Yes | - |
| 32710247  | G/T | 0.839 | 0.720 | 0.724 | 0.822 | Yes | - |
| 24733599  | A/G | 0.049 | 0.020 | 0.042 | 0.114 | Yes | - |
| 32546017  | A/G | 0.027 | 0.020 | 0.034 | 0.092 | Yes | - |
| 10347157  | A/G | 0.146 | 0.140 | 0.186 | 0.244 | Yes | - |
| 20107512  | A/G | 0.173 | 0.190 | 0.350 | 0.500 | Yes | - |
| 9841838   | A/G | 0.717 | 0.350 | 0.604 | 0.597 | Yes | - |
| 51783299  | C/T | 0.783 | NA    | 0.569 | 0.795 | Yes | - |
| 78436281  | G/T | 0.770 | NA    | 0.811 | 0.695 | Yes | - |
| 160601383 | A/G | 0.115 | 0.130 | 0.066 | 0.085 | Yes | - |
| 56838548  | C/T | 0.268 | 0.270 | 0.429 | 0.517 | Yes | - |
| 99327507  | A/G | 0.049 | 0.050 | 0.003 | 0.011 | Yes | - |
| 38148033  | A/G | 0.353 | 0.330 | 0.329 | 0.326 | Yes | - |
| 27281901  | A/G | 0.199 | NA    | 0.152 | 0.267 | Yes | - |
| 132023863 | A/G | 0.217 | NA    | 0.316 | 0.210 | Yes | - |
| 189925174 | C/T | 0.332 | NA    | 0.410 | 0.239 | Yes | - |
| 170583593 | A/G | 0.451 | 0.470 | 0.564 | 0.449 | Yes | - |
| 134991154 | A/T | 0.646 | 0.360 | 0.654 | 0.545 | Yes | - |
| 102196692 | C/T | 0.575 | 0.380 | 0.435 | 0.244 | Yes | - |
| 102200318 | A/G | 0.255 | 0.360 | 0.405 | 0.574 | Yes | - |
| 92338075  | C/G | 0.611 | 0.450 | 0.573 | 0.540 | Yes | - |
| 111302166 | A/T | 0.000 | 0.170 | 0.000 | 0.000 | Yes | - |
| 111302166 | A/T | 0.000 | 0.170 | 0.000 | 0.000 | Yes | - |
| 42657329  | A/G | 0.167 | 0.420 | 0.194 | 0.330 | Yes | - |
| 42657329  | A/G | 0.167 | 0.420 | 0.194 | 0.330 | Yes | - |
| 74684359  | A/T | 0.398 | 0.480 | 0.410 | 0.642 | Yes | - |
| 66892632  | A/T | 0.177 | 0.170 | 0.083 | 0.062 | Yes | - |
| 169492659 | C/T | 0.009 | 0.350 | 0.007 | 0.091 | Yes | - |
| 61327359  | C/T | 0.344 | 0.300 | 0.279 | 0.098 | Yes | - |
| 44195593  | C/T | 0.195 | 0.190 | 0.213 | 0.114 | Yes | - |
| 119659907 | C/T | 0.757 | 0.280 | 0.698 | 0.782 | Yes | - |
| 75879263  | C/T | 0.690 | 0.310 | 0.732 | 0.784 | Yes | - |
| 54691821  | A/G | 0.121 | 0.170 | 0.137 | 0.142 | Yes | - |
| 210768295 | G/T | 0.650 | 0.370 | 0.726 | 0.676 | Yes | - |
| 11088326  | C/G | 0.571 | 0.140 | 0.642 | 0.614 | Yes | - |
| 35072872  | C/T | 0.088 | NA    | 0.229 | 0.261 | Yes | - |
| 189200234 | C/T | 0.358 | 0.380 | 0.298 | 0.222 | Yes | - |
| 109623689 | A/G | 0.279 | 0.060 | 0.157 | 0.250 | Yes | - |
| 135143696 | C/T | 0.204 | 0.260 | 0.273 | 0.125 | Yes | - |
| 127535304 | A/T | 0.429 | 0.470 | 0.511 | 0.494 | Yes | - |
| 41456402  | C/T | 0.292 | 0.200 | 0.198 | 0.148 | Yes | - |
| 27596658  | A/G | 0.128 | 0.330 | 0.110 | 0.193 | Yes | - |
| 159850267 | C/T | 0.695 | 0.300 | 0.857 | 0.648 | Yes | - |
| 45041857  | C/T | 0.199 | 0.380 | 0.125 | 0.286 | Yes | - |
| 21695879  | C/T | 0.460 | 0.490 | 0.560 | 0.375 | Yes | - |
| 123531334 | A/G | 0.128 | 0.150 | 0.224 | 0.256 | Yes | - |
| 43927160  | C/T | 0.080 | 0.064 | 0.051 | 0.023 | Yes | - |
| 43927935  | C/T | 0.288 | 0.322 | 0.288 | 0.000 | Yes | - |
| 135129086 | A/C | 0.376 | 0.383 | 0.490 | 0.432 | Yes | - |
| 113578643 | A/G | 0.549 | 0.560 | 0.628 | 0.528 | Yes | - |

|           |     |       |       |       |       |     |                 |
|-----------|-----|-------|-------|-------|-------|-----|-----------------|
| 56053569  | C/T | 0.916 | 0.910 | 0.921 | 0.955 | Yes | -               |
| 1375087   | C/T | 0.566 | 0.550 | 0.701 | 0.790 | Yes | -               |
| 56095723  | C/T | 0.246 | 0.230 | 0.118 | 0.102 | Yes | -               |
| 25921129  | A/G | 0.451 | 0.460 | 0.341 | 0.494 | Yes | -               |
| 64090690  | C/T | 0.465 | 0.460 | 0.430 | 0.580 | Yes | -               |
| 64090690  | C/T | 0.465 | 0.460 | 0.430 | 0.580 | Yes | -               |
| 9575478   | A/G | 0.212 | 0.400 | 0.250 | 0.193 | Yes | -               |
| 9575478   | A/G | 0.788 | 0.790 | 0.750 | 0.807 | Yes | -               |
| 653483    | A/G | 0.217 | 0.270 | 0.245 | 0.199 | Yes | -               |
| 179275801 | G/T | 0.195 | 0.170 | 0.208 | 0.455 | Yes | -               |
| 49894772  | C/T | 0.832 | 0.460 | 0.566 | 0.449 | Yes | -               |
| 9713768   | A/G | 0.487 | 0.350 | 0.421 | 0.432 | Yes | -               |
| 43287339  | A/G | 0.164 | 0.150 | 0.178 | 0.159 | Yes | -               |
| 27594741  | C/T | 0.394 | 0.420 | 0.489 | 0.188 | Yes | -               |
| 88551344  | A/C | 0.571 | 0.840 | 0.661 | 0.881 | Yes | -               |
| 88650694  | A/G | 0.226 | 0.270 | 0.158 | 0.114 | Yes | -               |
| 102923368 | A/G | 0.566 | NA    | 0.593 | 0.477 | Yes | -               |
| 93338100  | G/T | 0.296 | 0.280 | 0.317 | 0.580 | Yes | -               |
| 46002411  | A/G | 0.376 | 0.360 | 0.448 | 0.438 | Yes | -               |
| 27636492  | C/T | 0.805 | 0.790 | 0.876 | 0.841 | Yes | -               |
| 65765213  | C/T | 0.323 | 0.300 | 0.119 | 0.159 | Yes | -               |
| 31244432  | A/G | 0.739 | 0.740 | 0.724 | 0.756 | Yes | -               |
| 653745    | A/G | 0.177 | 0.190 | 0.341 | 0.301 | Yes | -               |
| 74077523  | A/C | 0.341 | 0.350 | 0.348 | 0.318 | Yes | -               |
| 74077523  | A/C | 0.341 | 0.350 | 0.348 | 0.318 | Yes | -               |
| 102496    | A/C | 0.133 | 0.180 | 0.295 | 0.256 | Yes | -               |
| 150438339 | C/T | 0.230 | 0.760 | 0.455 | 0.364 | Yes | -               |
| 102970099 | A/G | 0.748 | 0.770 | 0.731 | 0.778 | Yes | -               |
| 75011116  | A/G | 0.553 | 0.710 | 0.554 | 0.688 | Yes | -               |
| 128404702 | A/G | 0.124 | 0.110 | 0.148 | 0.159 | Yes | -               |
| 33555394  | C/T | 0.938 | 0.850 | 0.950 | 0.960 | Yes | -               |
| 127866647 | C/T | 0.111 | 0.200 | 0.073 | 0.193 | Yes | -               |
| 32713862  | C/T | 0.080 | 0.120 | 0.146 | 0.102 | Yes | -               |
| 32713862  | C/T | 0.080 | 0.110 | 0.146 | 0.102 | Yes | -               |
| 11381382  | C/T | 0.239 | 0.230 | 0.186 | 0.318 | Yes | -               |
| 31829012  | A/G | 0.080 | 0.100 | 0.010 | 0.000 | Yes | -               |
| 128361203 | A/G | 0.398 | 0.130 | 0.500 | 0.403 | Yes | -               |
| 50276409  | G/T | 0.679 | 0.680 | 0.779 | 0.744 | Yes | -               |
| 106674727 | C/T | 0.363 | 0.260 | 0.231 | 0.244 | Yes | -               |
| 42411000  | A/C | 0.465 | 0.460 | 0.452 | 0.244 | Yes | -               |
| 150420290 | A/G | 0.058 | 0.100 | 0.077 | 0.040 | Yes | -               |
| 191611003 | A/G | 0.217 | 0.200 | 0.145 | 0.210 | Yes | -               |
| 32771829  | C/T | 0.522 | 0.500 | 0.366 | 0.432 | Yes | -               |
| 104836168 | C/T | 0.925 | 0.910 | 0.743 | 0.724 | Yes | -               |
| 104836168 | C/T | 0.925 | 0.910 | 0.743 | 0.724 | Yes | -               |
| 32850785  | A/G | 0.509 | 0.600 | 0.579 | 0.625 | Yes | -               |
| 10917030  | A/G | 0.522 | 0.460 | 0.431 | 0.455 | Yes | -               |
| 72864420  | A/C | 0.321 | 0.350 | 0.608 | 0.869 | Yes | -               |
| 11785365  | A/G | 0.832 | 0.140 | 0.827 | 0.824 | Yes | -               |
| 170583593 | A/G | 0.451 | 0.520 | 0.564 | 0.449 | Yes | -               |
| 10307114  | A/G | 0.106 | 0.890 | 0.060 | 0.040 | Yes | -               |
| 420489    | C/T | 0.159 | NA    | 0.033 | 0.006 | Yes | -               |
| 88650694  | A/G | 0.226 | NA    | 0.158 | 0.114 | Yes | -               |
| 88194838  | C/T | 0.290 | NA    | 0.153 | 0.227 | Yes | -               |
| 96173560  | A/G | 0.080 | NA    | 0.071 | 0.222 | Yes | -               |
| 149191041 | C/T | 0.301 | NA    | 0.379 | 0.398 | Yes | -               |
| 170963965 | C/G | 0.274 | 0.270 | 0.248 | 0.352 | Yes | -               |
| 170963965 | C/G | 0.274 | 0.300 | 0.248 | 0.352 | Yes | -               |
| 22307091  | G/T | 0.478 | NA    | 0.585 | 0.718 | Yes | -               |
| 87478090  | A/G | 0.801 | NA    | 0.803 | 0.767 | Yes | -               |
| 835516    | A/C | 0.783 | NA    | 0.697 | 0.770 | Yes | -               |
| 1339516   | A/C | 0.473 | 0.490 | 0.440 | 0.355 | Yes | -               |
| 33650516  | A/G | 0.181 | 0.200 | 0.274 | 0.438 | Yes | -               |
| 87414802  | A/G | 0.814 | 0.800 | 0.839 | 0.791 | Yes | -               |
| 87414802  | A/G | 0.814 | 0.830 | 0.839 | 0.791 | Yes | -               |
| 32551911  | C/G | 0.465 | 0.351 | 0.546 | 0.477 | Yes | -               |
| 218018585 | C/T | 0.456 | 0.442 | 0.424 | 0.739 | Yes | -               |
| 19715941  | C/T | 0.270 | 0.217 | 0.257 | 0.267 | Yes | -               |
| 19638105  | G/T | 0.699 | 0.664 | 0.617 | 0.648 | Yes | -               |
| 19638105  | G/T | 0.699 | 0.664 | 0.617 | 0.648 | Yes | -               |
| 78302049  | C/T | 0.367 | 0.321 | 0.290 | 0.108 | Yes | -               |
| 19268718  | C/T | 0.097 | 0.070 | 0.152 | 0.114 | Yes | -               |
| 19891970  | A/C | 0.115 | 0.120 | 0.131 | 0.085 | Yes | -               |
| 19891970  | A/C | 0.115 | 0.100 | 0.131 | 0.085 | No  | Duplicated      |
| 62890784  | A/C | 0.336 | 0.330 | 0.264 | 0.392 | No  | LD to rs1748195 |
| 117036941 | C/T | 0.031 | 0.028 | 0.041 | 0.062 | No  | LD to rs964184  |



|           |     |       |         |       |       |     |                  |
|-----------|-----|-------|---------|-------|-------|-----|------------------|
| 30825988  | C/G | 0.390 | 0.400   | 0.441 | 0.227 | Yes | -                |
| 62769426  | C/G | 0.659 | 0.650   | 0.738 | 0.551 | No  | LD to rs1748195  |
| 62964365  | C/T | 0.223 | 0.220   | 0.104 | 0.136 | No  | LD to rs1748195  |
| 116157417 | C/T | 0.040 | 0.060   | 0.087 | 0.028 | No  | LD to rs964184   |
| 19519472  | G/T | 0.095 | 0.100   | 0.131 | 0.097 | No  | Duplicated       |
| 19519472  | G/T | 0.095 | NA      | 0.131 | 0.097 | Yes | -                |
| 72620810  | C/T | 0.878 | 0.810   | 0.958 | 0.938 | Yes | -                |
| 72620810  | C/T | 0.878 | 0.870   | 0.958 | 0.938 | No  | Duplicated       |
| 72620810  | C/T | 0.878 | 0.840   | 0.958 | 0.938 | No  | Duplicated       |
| 126555591 | A/G | 0.429 | 0.490   | 0.455 | 0.375 | No  | LD to rs2001945  |
| 126555591 | A/G | 0.429 | 0.440   | 0.455 | 0.375 | No  | Duplicated       |
| 61327359  | C/T | 0.344 | 0.330   | 0.279 | 0.098 | No  | LD to rs174548   |
| 61327924  | C/G | 0.301 | NonEuro | 0.241 | 0.097 | Yes | -                |
| 62822181  | C/G | 0.659 | 0.700   | 0.722 | 0.552 | Yes | -                |
| 126547160 | C/G | 0.487 | NonEuro | 0.597 | 0.455 | Yes | -                |
| 228361539 | C/T | 0.432 | 0.400   | 0.500 | 0.631 | No  | LD to rs4846914  |
| 72625290  | C/T | 0.259 | NonEuro | 0.111 | 0.182 | No  | LD to rs7145738  |
| 19863719  | A/G | 0.708 | NonEuro | 0.628 | 0.830 | No  | LD to rs10503669 |
| 50114786  | A/G | 0.183 | 0.220   | 0.235 | 0.057 | Yes | -                |
| 123026120 | G/T | 0.615 | 0.660   | 0.622 | 0.805 | Yes | -                |
| 56461987  | C/G | 0.318 | 0.330   | 0.297 | 0.233 | Yes | -                |
| 228362314 | A/G | 0.429 | 0.390   | 0.493 | 0.636 | No  | Duplicated       |
| 228362314 | A/G | 0.429 | 0.400   | 0.493 | 0.636 | Yes | -                |
| 116159645 | C/T | 0.473 | NonEuro | 0.369 | 0.267 | No  | LD to rs964184   |
| 137409312 | G/T | 0.230 | 0.220   | 0.160 | 0.284 | Yes | -                |
| 21057522  | G/T | 0.212 | 0.220   | 0.303 | 0.551 | No  | LD to rs673548   |
| 21085700  | A/G | 0.491 | 0.480   | 0.436 | 0.233 | No  | LD to rs673548   |
| 21085700  | A/G | 0.491 | 0.490   | 0.436 | 0.233 | Yes | -                |
| 27596658  | A/G | 0.128 | NonEuro | 0.110 | 0.193 | No  | LD to rs780094   |
| 27594741  | C/T | 0.394 | 0.370   | 0.489 | 0.188 | No  | Duplicated       |
| 27594741  | C/T | 0.394 | 0.340   | 0.489 | 0.188 | No  | Duplicated       |
| 27594741  | C/T | 0.394 | 0.390   | 0.489 | 0.188 | Yes | -                |
| 116154127 | C/G | 0.121 | 0.130   | 0.177 | 0.176 | Yes | -                |
| 116154127 | C/G | 0.121 | 0.140   | 0.177 | 0.176 | No  | Duplicated       |
| 117872301 | A/C | 0.292 | NA      | 0.330 | 0.489 | Yes | -                |
| 205573077 | A/C | 0.097 | 0.200   | 0.063 | 0.068 | Yes | -                |
| 18444793  | A/G | 0.035 | 0.480   | 0.087 | 0.045 | Yes | -                |
| 114778805 | C/T | 0.243 | NA      | 0.212 | 0.239 | Yes | -                |
| 9747225   | G/T | 0.549 | 0.490   | 0.545 | 0.489 | Yes | -                |
| 54756892  | C/T | 0.407 | 0.420   | 0.369 | 0.250 | Yes | -                |
| 91014952  | C/G | 0.429 | 0.470   | 0.346 | 0.374 | Yes | -                |
| 6163501   | C/T | 0.102 | NA      | 0.207 | 0.180 | Yes | -                |
| 20250073  | A/T | 0.323 | 0.300   | 0.186 | 0.176 | Yes | -                |
| 11087374  | A/G | 0.319 | NA      | 0.261 | 0.477 | Yes | -                |
| 11087374  | A/G | 0.681 | 0.650   | 0.739 | 0.523 | Yes | -                |
| 11087374  | A/G | 0.681 | 0.680   | 0.739 | 0.523 | Yes | -                |
| 132656783 | C/G | 0.416 | 0.610   | 0.574 | 0.540 | Yes | -                |
| 123548812 | A/G | 0.345 | 0.260   | 0.321 | 0.151 | Yes | -                |
| 110971201 | A/G | 0.358 | NA      | 0.359 | 0.131 | Yes | -                |
| 110971201 | A/G | 0.358 | 0.420   | 0.359 | 0.131 | Yes | -                |
| 110971201 | A/G | 0.358 | 0.420   | 0.359 | 0.131 | Yes | -                |
| 24546313  | C/G | 0.283 | 0.270   | 0.169 | 0.267 | Yes | -                |
| 63881359  | C/T | 0.159 | 0.190   | 0.097 | 0.148 | Yes | -                |
| 54768447  | G/T | 0.330 | NA      | 0.319 | 0.193 | Yes | -                |
| 54768447  | G/T | 0.330 | 0.340   | 0.319 | 0.193 | Yes | -                |
| 35921264  | A/G | 0.420 | 0.430   | 0.472 | 0.000 | Yes | -                |
| 10336652  | A/C | 0.679 | 0.710   | 0.725 | 0.759 | Yes | -                |
| 12769947  | G/T | 0.115 | NA      | 0.142 | 0.102 | Yes | -                |
| 12769947  | G/T | 0.115 | 0.160   | 0.142 | 0.102 | Yes | -                |
| 204447164 | A/G | 0.460 | NA      | 0.588 | 0.653 | Yes | -                |
| 77022501  | C/T | 0.305 | 0.680   | 0.366 | 0.391 | Yes | -                |
| 11271580  | A/T | 0.451 | 0.440   | 0.489 | 0.432 | Yes | -                |
| 9801431   | A/G | 0.385 | 0.370   | 0.360 | 0.402 | Yes | -                |
| 97568704  | A/G | 0.265 | 0.290   | 0.379 | 0.621 | Yes | -                |
| 114105331 | A/C | 0.115 | NA      | 0.059 | 0.006 | Yes | -                |
| 114105331 | A/C | 0.115 | 0.100   | 0.059 | 0.006 | Yes | -                |
| 114105331 | A/C | 0.115 | 0.100   | 0.059 | 0.006 | Yes | -                |
| 35910332  | C/T | 0.757 | 0.710   | 0.788 | 0.869 | Yes | -                |
| 32712350  | A/G | 0.425 | NA      | 0.566 | 0.511 | Yes | -                |
| 32712350  | A/G | 0.425 | 0.610   | 0.566 | 0.511 | Yes | -                |
| 126740412 | A/G | 0.412 | 0.450   | 0.401 | 0.676 | Yes | -                |
| 6430456   | A/G | 0.155 | 0.190   | 0.160 | 0.182 | Yes | -                |
| 100191799 | C/T | 0.420 | 0.460   | 0.476 | 0.574 | Yes | -                |
| 42709459  | A/G | 0.398 | NA      | 0.462 | 0.375 | Yes | -                |
| 91014952  | C/G | 0.429 | NA      | 0.346 | 0.374 | Yes | -                |
| 11087374  | A/G | 0.319 | NA      | 0.261 | 0.477 | Yes | -                |

|           |     |       |         |       |       |     |                |
|-----------|-----|-------|---------|-------|-------|-----|----------------|
| 123548812 | A/G | 0.345 | NA      | 0.321 | 0.151 | Yes | -              |
| 54768447  | G/T | 0.330 | NA      | 0.319 | 0.193 | Yes | -              |
| 12769947  | G/T | 0.115 | NA      | 0.142 | 0.102 | Yes | -              |
| 35294289  | A/G | 0.473 | NA      | 0.466 | 0.330 | Yes | -              |
| 205006527 | A/G | 0.819 | NA      | 0.781 | 0.810 | Yes | -              |
| 204447164 | A/G | 0.460 | NA      | 0.588 | 0.653 | Yes | -              |
| 35881553  | A/G | 0.296 | NA      | 0.306 | 0.176 | Yes | -              |
| 2938029   | C/T | 0.915 | NonEuro | 0.766 | 0.750 | Yes | -              |
| 71345910  | A/G | 0.146 | NonEuro | 0.217 | 0.159 | Yes | -              |
| 22124094  | C/T | 0.801 | 0.830   | 0.869 | 0.909 | No  | Duplicated     |
| 22124094  | C/T | 0.801 | 0.850   | 0.869 | 0.909 | No  | D to rs2383208 |
| 22124094  | C/T | 0.801 | 0.830   | 0.869 | 0.909 | No  | Duplicated     |
| 12355003  | A/G | 0.642 | NonEuro | 0.667 | 0.562 | Yes | -              |
| 120319482 | G/T | 0.093 | 0.110   | 0.079 | 0.210 | Yes | -              |
| 20769013  | A/C | 0.336 | 0.320   | 0.317 | 0.216 | No  | D to rs7754840 |
| 94452862  | C/T | 0.584 | NonEuro | 0.532 | 0.415 | Yes | -              |
| 94452862  | C/T | 0.584 | 0.530   | 0.532 | 0.415 | No  | Duplicated     |
| 94452862  | C/T | 0.584 | 0.520   | 0.532 | 0.415 | No  | Duplicated     |
| 94452862  | C/T | 0.584 | 0.600   | 0.532 | 0.415 | No  | Duplicated     |
| 53385263  | A/T | 0.743 | 0.730   | 0.817 | 0.824 | Yes | -              |
| 78219277  | A/G | 0.642 | NA      | 0.646 | 0.551 | Yes | -              |
| 231406777 | A/G | 0.933 | NonEuro | 0.892 | 0.955 | Yes | -              |
| 49643809  | A/G | 0.155 | 0.150   | 0.201 | 0.358 | Yes | -              |
| 22126489  | A/T | 0.835 | NA      | 0.911 | 0.932 | No  | D to rs2383208 |
| 79615157  | A/G | 0.727 | NonEuro | 0.866 | 0.835 | Yes | -              |
| 60201306  | C/T | 0.429 | NonEuro | 0.404 | 0.551 | No  | D to rs1436955 |
| 60191674  | C/T | 0.743 | NonEuro | 0.735 | 0.739 | Yes | -              |
| 187011774 | A/C | 0.296 | NA      | 0.411 | 0.511 | Yes | -              |
| 69863368  | C/G | 0.482 | 0.500   | 0.500 | 0.420 | No  | D to rs7961581 |
| 64461161  | C/G | 0.115 | NA      | 0.152 | 0.182 | Yes | -              |
| 205718799 | A/G | 0.027 | NonEuro | 0.021 | 0.068 | Yes | -              |
| 77964419  | C/T | 0.009 | NonEuro | 0.032 | 0.034 | Yes | -              |
| 12368125  | C/G | 0.903 | 0.860   | 0.959 | 0.909 | No  | Duplicated     |
| 12368125  | C/G | 0.903 | 0.820   | 0.959 | 0.909 | No  | Duplicated     |
| 12368125  | C/G | 0.903 | NA      | 0.959 | 0.909 | Yes | -              |
| 70601480  | C/T | 0.353 | NonEuro | 0.272 | 0.307 | Yes | -              |
| 22122076  | A/G | 0.792 | NonEuro | 0.871 | 0.914 | Yes | -              |
| 11184950  | C/G | 0.558 | NonEuro | 0.714 | 0.739 | Yes | -              |
| 143913690 | C/G | 0.040 | NonEuro | 0.021 | 0.040 | Yes | -              |
| 186994381 | G/T | 0.296 | NonEuro | 0.431 | 0.506 | No  | Duplicated     |
| 186994381 | G/T | 0.296 | NA      | 0.431 | 0.506 | No  | Duplicated     |
| 186994381 | G/T | 0.296 | 0.290   | 0.431 | 0.506 | No  | Duplicated     |
| 186994381 | G/T | 0.296 | 0.300   | 0.431 | 0.506 | No  | Duplicated     |
| 186994381 | G/T | 0.296 | 0.320   | 0.431 | 0.506 | Yes | -              |
| 114746031 | A/T | 0.296 | 0.320   | 0.228 | 0.305 | No  | D to rs7901695 |
| 64686944  | C/T | 0.810 | 0.760   | 0.603 | 0.494 | Yes | -              |
| 94455539  | C/T | 0.580 | NonEuro | 0.535 | 0.443 | No  | Duplicated     |
| 94455539  | C/T | 0.580 | NA      | 0.535 | 0.443 | No  | D to rs1111875 |
| 94455539  | C/T | 0.580 | NA      | 0.535 | 0.443 | No  | Duplicated     |
| 94455539  | C/T | 0.580 | 0.570   | 0.535 | 0.443 | No  | Duplicated     |
| 17365206  | C/T | 0.398 | NA      | 0.335 | 0.397 | No  | Duplicated     |
| 17365206  | C/T | 0.398 | NA      | 0.335 | 0.397 | Yes | -              |
| 22019547  | C/T | 0.566 | 0.560   | 0.688 | 0.676 | Yes | -              |
| 128978900 | A/C | 0.496 | NonEuro | 0.709 | 0.636 | Yes | -              |
| 119887315 | C/T | 0.796 | NA      | 0.712 | 0.739 | Yes | -              |
| 94842629  | C/T | 0.802 | NonEuro | 0.819 | 0.776 | Yes | -              |
| 151346182 | C/G | 0.995 | NonEuro | 0.952 | 0.959 | Yes | -              |
| 20769229  | C/G | 0.336 | 0.310   | 0.317 | 0.216 | No  | Duplicated     |
| 20769229  | C/G | 0.336 | 0.360   | 0.317 | 0.216 | No  | Duplicated     |
| 20787688  | A/G | 0.279 | 0.260   | 0.290 | 0.244 | Yes | -              |
| 114744078 | C/T | 0.281 | NA      | 0.228 | 0.295 | Yes | -              |
| 69949369  | C/T | 0.252 | 0.270   | 0.367 | 0.358 | Yes | -              |
| 89322341  | A/C | 0.261 | NA      | 0.528 | 0.585 | Yes | -              |
| 52373776  | A/C | 0.460 | NA      | 0.416 | 0.261 | No  | Duplicated     |
| 52373776  | A/C | 0.460 | 0.380   | 0.416 | 0.261 | No  | Duplicated     |
| 52373776  | A/C | 0.460 | 0.400   | 0.416 | 0.261 | No  | D to rs9939609 |
| 64023337  | C/T | 0.774 | NonEuro | 0.856 | 0.847 | Yes | -              |
| 28147081  | C/T | 0.487 | 0.500   | 0.576 | 0.776 | Yes | -              |
| 20825234  | C/T | 0.164 | 0.180   | 0.268 | 0.222 | Yes | -              |
| 43919740  | C/T | 0.239 | 0.280   | 0.248 | 0.227 | Yes | -              |
| 52378028  | A/T | 0.460 | 0.400   | 0.412 | 0.267 | Yes | -              |
| 67478546  | A/G | 0.959 | 0.940   | 0.950 | 0.000 | Yes | -              |
| 199202489 | C/T | 0.668 | NA      | 0.793 | 0.903 | Yes | -              |
| 218718391 | C/T | 0.425 | 0.490   | 0.517 | 0.517 | Yes | -              |
| 647083    | C/T | 0.752 | 0.770   | 0.654 | 0.767 | Yes | -              |
| 20012623  | A/G | 0.137 | NA      | 0.276 | 0.210 | Yes | -              |

|           |     |       |         |       |       |     |            |
|-----------|-----|-------|---------|-------|-------|-----|------------|
| 67148731  | A/C | 0.836 | 0.760   | 0.761 | 0.739 | Yes | -          |
| 123548812 | A/G | 0.345 | 0.270   | 0.321 | 0.151 | Yes | -          |
| 67466790  | A/G | 0.704 | NA      | 0.626 | 0.386 | Yes | -          |
| 61798026  | A/G | 0.752 | 0.770   | 0.735 | 0.830 | Yes | -          |
| 102030060 | G/T | 0.420 | 0.460   | 0.399 | 0.392 | Yes | -          |
| 66882928  | C/T | 0.058 | 0.055   | 0.074 | 0.051 | Yes | -          |
| 35294289  | A/G | 0.473 | 0.460   | 0.466 | 0.330 | Yes | -          |
| 205010591 | A/C | 0.169 | 0.160   | 0.190 | 0.190 | Yes | -          |
| 205006527 | A/G | 0.181 | 0.160   | 0.219 | 0.190 | Yes | -          |
| 205006527 | A/G | 0.181 | NA      | 0.219 | 0.190 | Yes | -          |
| 205006527 | A/G | 0.181 | 0.150   | 0.219 | 0.190 | Yes | -          |
| 107280025 | A/G | 0.562 | 0.560   | 0.622 | 0.688 | Yes | -          |
| 128361203 | A/G | 0.398 | 0.440   | 0.500 | 0.403 | Yes | -          |
| 42498442  | A/C | 0.562 | 0.540   | 0.667 | 0.603 | Yes | -          |
| 42498442  | A/C | 0.562 | 0.520   | 0.667 | 0.603 | Yes | -          |
| 20044447  | A/G | 0.509 | 0.540   | 0.660 | 0.648 | Yes | -          |
| 20044447  | A/G | 0.509 | NA      | 0.660 | 0.648 | Yes | -          |
| 20044447  | A/G | 0.491 | 0.540   | 0.340 | 0.352 | Yes | -          |
| 40446692  | G/T | 0.646 | 0.610   | 0.533 | 0.448 | Yes | -          |
| 101280291 | C/T | 0.447 | 0.470   | 0.366 | 0.352 | Yes | -          |
| 101280291 | C/T | 0.447 | 0.460   | 0.366 | 0.352 | Yes | -          |
| 106628720 | C/T | 0.209 | 0.210   | 0.190 | 0.064 | Yes | -          |
| 138048197 | A/G | 0.165 | 0.210   | 0.054 | 0.086 | Yes | -          |
| 22571034  | A/G | 0.814 | 0.830   | 0.857 | 0.812 | Yes | -          |
| 22571034  | A/G | 0.814 | 0.830   | 0.857 | 0.812 | Yes | -          |
| 61058360  | A/G | 0.379 | 0.390   | 0.254 | 0.212 | Yes | -          |
| 2756406   | A/C | 0.712 | 0.710   | 0.895 | 0.824 | Yes | -          |
| 107282670 | A/G | 0.414 | 0.410   | 0.329 | 0.431 | Yes | -          |
| 32471822  | C/T | 0.659 | 0.910   | 0.893 | 0.767 | Yes | -          |
| 32537621  | C/T | 0.575 | 0.660   | 0.809 | 0.688 | Yes | -          |
| 32539125  | A/G | 0.420 | 0.450   | 0.576 | 0.506 | Yes | -          |
| 39911977  | C/T | 0.779 | 0.760   | 0.886 | 0.966 | Yes | -          |
| 39403510  | C/T | 0.478 | 0.460   | 0.529 | 0.621 | Yes | -          |
| 84593504  | C/T | 0.451 | 0.490   | 0.459 | 0.419 | Yes | -          |
| 100560884 | C/T | 0.868 | NA      | 0.866 | 0.932 | Yes | -          |
| 1704037   | C/T | 0.199 | 0.190   | 0.359 | 0.199 | Yes | -          |
| 128787250 | G/T | 0.425 | 0.440   | 0.483 | 0.642 | Yes | -          |
| 128787250 | G/T | 0.425 | 0.450   | 0.483 | 0.642 | Yes | -          |
| 45789098  | A/G | 0.095 | 0.115   | 0.052 | 0.011 | Yes | -          |
| 35072872  | C/T | 0.088 | 0.092   | 0.229 | 0.261 | Yes | -          |
| 18316718  | C/T | 0.288 | 0.230   | 0.174 | 0.205 | Yes | -          |
| 38056468  | C/T | 0.372 | 0.350   | 0.489 | 0.460 | Yes | -          |
| 120880160 | A/G | 0.124 | 0.152   | 0.172 | 0.210 | Yes | -          |
| 105704389 | C/T | 0.009 | 0.070   | 0.017 | 0.040 | Yes | -          |
| 59136095  | C/T | 0.549 | 0.340   | 0.369 | 0.494 | Yes | -          |
| 167780630 | A/G | 0.076 | 0.120   | 0.147 | 0.085 | Yes | -          |
| 187422379 | A/T | 0.398 | 0.440   | 0.372 | 0.381 | Yes | -          |
| 38632903  | A/T | 0.195 | 0.210   | 0.207 | 0.193 | Yes | -          |
| 35271831  | A/G | 0.128 | 0.180   | 0.066 | 0.071 | Yes | -          |
| 36527059  | G/T | 0.372 | 0.400   | 0.591 | 0.591 | Yes | -          |
| 113277623 | C/T | 0.248 | 0.290   | 0.360 | 0.426 | Yes | -          |
| 61646265  | G/T | 0.496 | 0.460   | 0.552 | 0.568 | Yes | -          |
| 61748819  | C/G | 0.469 | 0.430   | 0.593 | 0.278 | Yes | -          |
| 60142628  | C/T | 0.379 | 0.410   | 0.585 | 0.517 | Yes | -          |
| 8682141   | C/T | 0.301 | 0.290   | 0.198 | 0.205 | Yes | -          |
| 65005721  | A/G | 0.257 | 0.200   | 0.156 | 0.102 | Yes | -          |
| 69670887  | C/T | 0.208 | 0.220   | 0.280 | 0.216 | Yes | -          |
| 116154127 | C/G | 0.121 | 0.150   | 0.177 | 0.176 | Yes | -          |
| 42709255  | A/G | 0.323 | 0.373   | 0.369 | 0.341 | Yes | -          |
| 88650694  | A/G | 0.774 | 0.733   | 0.842 | 0.886 | Yes | -          |
| 167280379 | C/T | 0.571 | 0.380   | 0.375 | 0.443 | Yes | -          |
| 32481676  | G/T | 0.398 | 0.370   | 0.300 | 0.392 | Yes | -          |
| 135713341 | A/G | 0.221 | 0.200   | 0.269 | 0.290 | Yes | -          |
| 43772363  | C/G | 0.442 | NonEuro | 0.550 | 0.534 | No  | Duplicated |
| 168832565 | C/T | 0.363 | NonEuro | 0.379 | 0.386 | Yes | -          |
| 223644982 | C/T | 0.058 | 0.060   | 0.077 | 0.062 | Yes | -          |
| 170613171 | A/G | 0.405 | 0.430   | 0.475 | 0.415 | Yes | -          |
| 25837634  | C/T | 0.159 | 0.210   | 0.205 | 0.455 | Yes | -          |
| 6688148   | G/T | 0.580 | 0.610   | 0.654 | 0.500 | Yes | -          |
| 27781671  | A/G | 0.588 | 0.570   | 0.410 | 0.420 | Yes | -          |
| 52481466  | C/T | 0.960 | 0.940   | 0.954 | 0.943 | Yes | -          |
| 64680405  | C/T | 0.549 | 0.590   | 0.366 | 0.267 | Yes | -          |
| 43866851  | A/G | 0.575 | 0.560   | 0.507 | 0.790 | Yes | -          |
| 35131705  | A/G | 0.576 | 0.600   | 0.546 | 0.307 | Yes | -          |
| 95332048  | C/T | 0.606 | NonEuro | 0.705 | 0.790 | Yes | -          |
| 180103425 | C/T | 0.850 | 0.850   | 0.872 | 0.153 | Yes | -          |

|           |     |       |         |       |       |     |                 |
|-----------|-----|-------|---------|-------|-------|-----|-----------------|
| 43772363  | C/G | 0.442 | NonEuro | 0.550 | 0.534 | Yes | -               |
| 25012364  | C/T | 0.969 | 0.960   | 0.893 | 0.955 | Yes | -               |
| 72153016  | C/T | 0.469 | 0.460   | 0.493 | 0.653 | Yes | -               |
| 21511184  | C/T | 0.588 | 0.610   | 0.583 | 0.727 | Yes | -               |
| 96716582  | C/T | 0.593 | 0.630   | 0.511 | 0.409 | No  | LD to rs1555543 |
| 27636492  | C/T | 0.805 | 0.850   | 0.876 | 0.841 | No  | Duplicated      |
| 48533735  | A/G | 0.345 | 0.370   | 0.356 | 0.420 | No  | Duplicated      |
| 27539705  | C/T | 0.805 | 0.760   | 0.876 | 0.841 | No  | LD to rs6265    |
| 52373776  | A/C | 0.460 | 0.410   | 0.416 | 0.261 | No  | Duplicated      |
| 123032396 | C/T | 0.659 | 0.570   | 0.714 | 0.648 | Yes | -               |
| 24573639  | A/G | 0.393 | 0.470   | 0.401 | 0.551 | Yes | -               |
| 31589278  | A/G | 0.885 | 0.810   | 0.852 | 0.891 | Yes | -               |
| 75175236  | A/T | 0.341 | 0.430   | 0.394 | 0.267 | Yes | -               |
| 87477619  | A/G | 0.230 | 0.430   | 0.190 | 0.307 | Yes | -               |
| 4763110   | C/T | 0.553 | 0.330   | 0.486 | 0.602 | Yes | -               |
| 15908870  | C/T | 0.075 | 0.040   | 0.088 | 0.188 | Yes | -               |
