# Supplementary material
Source: publisher figshare collection journal article supplement (https://karger.figshare.com/articles/dataset/_/4747918)
Supplement: Supplementary file 5 [file 1]

## Supplementary Table 2. Differences in RAF among populations using European

### A) Evidence from the 102 SNPs for which the European RAF is available at the Catalog

| Disease/<br>Trait       | SNP | Average RAF    |                    |       | Test of differences in F    |                             |
|-------------------------|-----|----------------|--------------------|-------|-----------------------------|-----------------------------|
|                         |     | Europe<br>Roma | Europe<br>Non-Roma | India | $\Delta_{R\_E}$             | $\Delta_{R\_I}$             |
| Coronary<br>Artery Dis. | 30  | 0.565          | 0.549              | 0.546 | 0.016<br>( <i>P</i> =0.25)  | 0.019<br>( <i>P</i> =0.45)  |
| Type 2<br>Diabetes      | 12  | 0.415          | 0.377              | 0.43  | 0.038<br>( <i>P</i> =0.11)  | -0.015<br>( <i>P</i> =0.79) |
| Trigly-<br>cerides      | 14  | 0.386          | 0.353              | 0.353 | 0.033<br>( <i>P</i> =0.13)  | 0.033<br>( <i>P</i> =0.31)  |
| Insulin response        | 5   | 0.698          | 0.66               | 0.784 | 0.038<br>( <i>P</i> =0.20)  | -0.086<br>( <i>P</i> =0.97) |
| Obesity                 | 41  | 0.532          | 0.54               | 0.506 | -0.008<br>( <i>P</i> =0.81) | 0.026<br>( <i>P</i> =0.33)  |
| All combined            | 102 | 0.516          | 0.504              | 0.501 | 0.012<br>( <i>P</i> =0.22)  | 0.015<br>( <i>P</i> =0.57)  |

### B) Evidence for the same 102 SNPs above but using the European RAF from HapMap CE

| Disease/<br>Trait       | SNP | Average RAF    |                    |       | Test of differences in F    |                             |
|-------------------------|-----|----------------|--------------------|-------|-----------------------------|-----------------------------|
|                         |     | Europe<br>Roma | Europe<br>Non-Roma | India | $\Delta_{R\_E}$             | $\Delta_{R\_I}$             |
| Coronary<br>Artery Dis. | 30  | 0.565          | 0.545              | 0.546 | 0.02<br>( <i>P</i> =0.19)   | 0.019<br>( <i>P</i> =0.44)  |
| Type 2<br>Diabetes      | 12  | 0.415          | 0.379              | 0.43  | 0.036<br>( <i>P</i> =0.13)  | -0.015<br>( <i>P</i> =0.78) |
| Trigly-<br>cerides      | 14  | 0.386          | 0.351              | 0.353 | 0.035<br>( <i>P</i> =0.11)  | 0.033<br>( <i>P</i> =0.30)  |
| Insulin response        | 5   | 0.698          | 0.633              | 0.784 | 0.065<br>( <i>P</i> =0.08)  | -0.086<br>( <i>P</i> =0.97) |
| Obesity                 | 41  | 0.532          | 0.544              | 0.506 | -0.012<br>( <i>P</i> =0.87) | 0.026<br>( <i>P</i> =0.34)  |
| All combined            | 102 | 0.516          | 0.503              | 0.501 | 0.013<br>( <i>P</i> =0.19)  | 0.015<br>( <i>P</i> =0.56)  |

ean RAF from the GWAS Catalog

| RAF                         |
|-----------------------------|
| $\Delta_{I\_E}$             |
| -0.003<br>( <i>P</i> =0.39) |
| 0.053<br>( <i>P</i> =0.07)  |
| 0<br>( <i>P</i> =0.42)      |
| 0.124<br>( <i>P</i> =0.02)  |
| -0.034<br>( <i>P</i> =0.79) |
| -0.002<br>( <i>P</i> =0.26) |

EU

| RAF                         |
|-----------------------------|
| $\Delta_{I\_E}$             |
| 0.001<br>( <i>P</i> =0.33)  |
| 0.051<br>( <i>P</i> =0.08)  |
| 0.002<br>( <i>P</i> =0.39)  |
| 0.151<br>( <i>P</i> =0.01)  |
| -0.038<br>( <i>P</i> =0.82) |
| -0.001<br>( <i>P</i> =0.24) |
