# Supplementary material
Source: publisher figshare collection journal article supplement (https://karger.figshare.com/articles/dataset/_/4747918)
Supplement: Supplementary file 6 [file 1]

Archive with 10 entries (10 files):
- Fig.1S.pdf
- Fig.2S.pdf
- Fig.3S.pdf
- Fig.4S.pdf
- Fig.5S.pdf
- Fig.6S.pdf
- HHE_201311002_1_10.xlsx
- HHE_201311002_1_11.xlsx
- Table 1S.PDF
- Table 2S.PDF
