# Supplementary material
Source: publisher figshare collection journal article supplement (https://karger.figshare.com/articles/dataset/_/4747918)
Supplement: Supplementary file 6 [file 1 › HHE_201311002_1_10.xlsx]

## Sheet: Supplementary Table 1
		Supplementary Table 1. Disease-associated SNPs considered in the present study
		A = The phenotypes from the GWAS Catalog are summarized into six categories, namely, the five diseases that show higher prevalence in European Romani, plus a sixth category "Other" that pools all the SNPs associated to any
		other trait (this sixth category was used in the Permutation analyses)
		B = This column records the Risk Allele Frequency available from the GWAS Catalog. Associations from "non-European GWAS" are labelled as NonEuro, and not considered for the analysis. Also, SNPs for which the Catalog had
		recorded the wrong allele as causal are marked in red (e.g. if 0.76 in red, the Catalog recorded 0.24 as the RAF from the GWAS study)
		C = This column indicates if the SNP has been considered for the analysis comparing the RAF between populations
		D = Reason for exclusion. "Duplicated" indicates that this SNP is repeated as associated to the same phenotype. Further, some SNPs have been excluded if they are in LD (r2 > 0.8) with any other associated SNP (see M&M section)
	Nb	Pubmed	Author	Journal	Disease (Catalog)	Disease (assigned) A	Pvalue	OR	OR_text	SNP - Risk Allele	Chr	Position	Alleles	Non-Rom. European RAF (Hapmap CEU)	Non-Rom. European RAF (from GWAS paper) B	Romani European RAF	Indian RAF (Hapmap GIH)	Included? C	Reason for Exclusion D
	1	20932310	Han MR	BMC Neurol	AB1-42	Other	9e-07	NR	NR	rs12534221-A	chr7	130938530	A/C	0.146	NA	0.2273	0.141	Yes	-
	2	20932310	Han MR	BMC Neurol	AB1-42	Other	2e-09	NR	NR	rs2899472-A	chr15	49303347	A/C	0.248	NA	0.1761	0.182	Yes	-
	3	22055160	Bown MJ	Am J Hum Genet	Abdominal aortic aneurysm	Other	5e-10	1.15	[1.10-1.21]	rs1466535-C	chr12	55820737	A/G	0.686	0.58	0.6345	0.54	Yes	-
	4	20622881	Gretarsdottir S	Nat Genet	Abdominal aortic aneurysm	Other	5e-10	1.21	[1.14-1.28]	rs7025486-A	chr9	123462224	A/G	0.248	0.23	0.3056	0.31	Yes	-
	5	19684603	Trevino LR	Nat Genet	Acute lymphoblastic leukemia (childhood)	Other	1e-15	1.91	[1.60-2.20]	rs10821936-C	chr10	63393583	C/T	0.31	0.34	0.4862	0.608	Yes	-
	6	19684603	Trevino LR	Nat Genet	Acute lymphoblastic leukemia (childhood)	Other	9e-06	2.55	[1.60-3.80]	rs10849033-G	chr12	4295383	A/G	0.009	0.02	0.07986	0.131	Yes	-
	7	19684603	Trevino LR	Nat Genet	Acute lymphoblastic leukemia (childhood)	Other	4e-06	1.55	[1.20-1.80]	rs10873876-T	chr1	76544916	C/T	0.15	0.15	0.1538	0.184	Yes	-
	8	19684603	Trevino LR	Nat Genet	Acute lymphoblastic leukemia (childhood)	Other	3e-07	3.62	[2.10-6.00]	rs11155133-G	chr6	141211518	A/G	0	0.01	0.02778	0.108	Yes	-
	9	19684603	Trevino LR	Nat Genet	Acute lymphoblastic leukemia (childhood)	Other	8e-11	1.69	[1.40-1.90]	rs11978267-G	chr7	50433798	A/G	0.301	0.27	0.3456	0.375	Yes	-
	10	19684603	Trevino LR	Nat Genet	Acute lymphoblastic leukemia (childhood)	Other	3e-06	1.48	[1.20-1.70]	rs12621643-T	chr2	223626227	G/T	0.263	0.28	0.2897	0.142	Yes	-
	11	19684603	Trevino LR	Nat Genet	Acute lymphoblastic leukemia (childhood)	Other	9e-06	1.53	[1.20-1.80]	rs1879352-C	chr18	2488054	C/T	0.168	0.16	0.1771	0.138	Yes	-
	12	19684603	Trevino LR	Nat Genet	Acute lymphoblastic leukemia (childhood)	Other	7e-06	1.52	[1.20-1.80]	rs1881797-C	chr1	245756155	C/T	0.129	0.18	0.1503	0.057	Yes	-
	13	19684603	Trevino LR	Nat Genet	Acute lymphoblastic leukemia (childhood)	Other	8e-08	2.26	[1.60-3.0]	rs2089222-A	chr12	115487041	A/G	0.022	0.03	0.01034	0.011	Yes	-
	14	19684603	Trevino LR	Nat Genet	Acute lymphoblastic leukemia (childhood)	Other	4e-07	1.52	[1.20-1.70]	rs2191566-G	chr19	49203229	G/T	0.288	0.28	0.3414	0.295	Yes	-
	15	19684603	Trevino LR	Nat Genet	Acute lymphoblastic leukemia (childhood)	Other	9e-06	2	[1.40-2.70]	rs563507-A	chr10	34857994	A/G	0.04	0.04	0.06944	0.028	Yes	-
	16	19684603	Trevino LR	Nat Genet	Acute lymphoblastic leukemia (childhood)	Other	7e-06	1.43	[1.20-1.60]	rs6428370-G	chr1	195111216	A/G	0.344	0.32	0.3958	0	Yes	-
	17	19684603	Trevino LR	Nat Genet	Acute lymphoblastic leukemia (childhood)	Other	2e-06	1.49	[1.20-1.70]	rs7554607-A	chr1	235333226	A/G	0.571	0.56	0.4757	0.585	Yes	-
	18	19684603	Trevino LR	Nat Genet	Acute lymphoblastic leukemia (childhood)	Other	6e-06	1.58	[1.20-1.90]	rs9290663-T	chr3	179912633	A/T	0.147	0.13	0.2238	0	Yes	-
	19	21700879	Qi L	Diabetes	Adiponectin levels	Other	5e-08	NR	NR	rs10447248-A	chr5	107943635	A/G	0.301	0.34	0.4784	0.597	Yes	-
	20	21700879	Qi L	Diabetes	Adiponectin levels	Other	5e-06	NR	NR	rs10517133-C	chr4	45059671	C/G	0.088	0.9	0.25	0.151	Yes	-
	21	21700879	Qi L	Diabetes	Adiponectin levels	Other	5e-06	NR	NR	rs13358260-C	chr5	78881467	C/T	0.058	0.93	0.1076	0.062	Yes	-
	22	20018283	Heid IM	Atherosclerosis	Adiponectin levels	Other	1e-41	0.13	[NR] log(ug/ml) increase	rs17366568-G	chr3	188053147	A/G	0.881	0.89	0.8322	0.841	Yes	-
	23	21700879	Qi L	Diabetes	Adiponectin levels	Other	8e-07	NR	NR	rs2468677-G	chr8	140588699	G/T	0.527	0.52	0.4271	0.483	Yes	-
	24	20876611	Wu Y	Hum Mol Genet	Adiponectin levels	Other	4e-30	0.11	[0.09-0.13] unit decrease	rs3865188-T	chr16	81208218	A/T	0.465	0.47	0.3586	0.426	Yes	-
	25	19165155	Ling H	Obesity (Silver Spring)	Adiponectin levels	Other	5e-08	NR	NR	rs6773957-A	chr3	188056399	A/G	0.376	0.37	0.3345	0.33	Yes	-
	26	20876611	Wu Y	Hum Mol Genet	Adiponectin levels	Other	1e-19	0.13	[0.10-0.16] unit increase	rs864265-G	chr3	188036986	G/T	0.876	0.88	0.85	0.767	Yes	-
	27	19557161	Lindgren CM	PLoS Genet	Adiposity	Obesity	3e-08	0.04	[0.03-0.05] z-score unit increase	rs2605100-G	chr1	217710847	A/G	0.686	0.692	0.7222	0.818	Yes	-
	28	21706003	Kilpelainen TO	Nat Genet	Adiposity	Obesity	7e-08	0.03	[NR] % decrease	rs534870-A	chr13	79857208	A/G	0.723	0.68	0.7273	0.494	Yes	-
	29	19557161	Lindgren CM	PLoS Genet	Adiposity	Obesity	3e-07	NR	NR	rs6429082-C	chr1	233666752	C/T	0.478	0.46	0.5699	0.477	Yes	-
	30	21706003	Kilpelainen TO	Nat Genet	Adiposity	Obesity	3e-26	0.06	[NR] % decrease	rs8050136-C	chr16	52373776	A/C	0.46	0.4	0.4161	0.261	No	Duplicated
	31	19557161	Lindgren CM	PLoS Genet	Adiposity	Obesity	2e-11	0.04	[0.03-0.05] z-score unit increase	rs987237-G	chr6	50911009	A/G	0.164	0.164	0.1828	0.284	No	Duplicated
	32	21665990	Yu Y	Hum Mol Genet	Age-related macular degeneration	Other	1e-300	2.94	[NR]	rs10490924-T	chr10	124204438	G/T	0.199	0.21	0.4021	0.364	Yes	-
	33	20861866	Kopplin LJ	Genes Immun	Age-related macular degeneration	Other	1e-60	2.75	[NR]	rs10490924-T	chr10	124204438	G/T	0.199	NA	0.4021	0.364	Yes	-
	34	20385819	Chen W	Proc Natl Acad Sci U S A	Age-related macular degeneration	Other	2e-76	3.11	[2.76-3.51]	rs10737680-A	chr1	194946078	A/C	0.58	0.566	0.5903	0.455	Yes	-
	35	20385819	Chen W	Proc Natl Acad Sci U S A	Age-related macular degeneration	Other	4e-06	NR	NR	rs11878133-T	chr18	56218017	C/T	0.978	NA	0.96552	0.931	Yes	-
	36	20385826	Neale BM	Proc Natl Acad Sci U S A	Age-related macular degeneration	Other	3e-06	1.24	[1.13-1.35]	rs13095226-C	chr3	100878962	C/T	0.066	0.12	0.1643	0.091	Yes	-
	37	21909106	Arakawa S	Nat Genet	Age-related macular degeneration	Other	2e-08	1.3	[1.19-1.42]	rs1713985-G	chr4	57481207	G/T	0.102	0.29	0.2	0.273	Yes	-
	38	20385819	Chen W	Proc Natl Acad Sci U S A	Age-related macular degeneration	Other	2e-06	NR	NR	rs2958154-C	chr12	55351980	C/T	0.321	NA	0.2972	0.199	Yes	-
	39	20385819	Chen W	Proc Natl Acad Sci U S A	Age-related macular degeneration	Other	1e-07	1.14	[1.09-1.20]	rs493258-C	chr15	56475172	C/T	0.491	0.56	0.3897	0.312	Yes	-
	40	20385826	Neale BM	Proc Natl Acad Sci U S A	Age-related macular degeneration	Other	2e-08	1.16	[1.10-1.22]	rs493258-C	chr15	56475172	C/T	0.491	0.55	0.3897	0.312	Yes	-
	41	21782286	Walter S	Neurobiol Aging	Aging (time to event)	Other	7e-06	1.18	[NR]	rs3112530-G	chr5	152619870	A/G	0.929	0.92	0.90625	0.938	Yes	-
	42	21782286	Walter S	Neurobiol Aging	Aging (time to event)	Other	6e-06	1.17	[NR]	rs4764043-T	chr12	14006749	C/T	0.08	0.08	0.04514	0.136	Yes	-
	43	19754311	Le Clerc S	J Infect Dis	AIDS	Other	4e-06	2.13	[1.56-2.91]	rs3108919-C	chr8	101910722	C/T	0.241	0.27	0.2482	0.293	Yes	-
	44	21665994	Kutalik Z	Hum Mol Genet	Alcohol consumption	Other	5e-43	0.29	[0.25-0.33] unit decrease	rs1049296-T	chr3	134977044	C/T	0.137	0.17	0.2465	0.205	Yes	-
	45	21270382	Baik I	Am J Clin Nutr	Alcohol consumption	Other	1e-23	0.55	[0.45-0.65] unit decrease	rs10849915-G	chr12	109818005	C/T	0.358	0.18	0.2951	0.364	Yes	-
	46	21270382	Baik I	Am J Clin Nutr	Alcohol consumption	Other	4e-35	0.79	[0.67-0.91] unit decrease	rs12229654-G	chr12	109898844	G/T	0	0.14	0	0	Yes	-
	47	21665994	Kutalik Z	Hum Mol Genet	Alcohol consumption	Other	2e-17	0.29	[0.22-0.36] unit decrease	rs1534166-A	chr3	135019757	A/G	0.766	0.3	0.6993	0.801	Yes	-
	48	21270382	Baik I	Am J Clin Nutr	Alcohol consumption	Other	6e-17	0.61	[0.49-0.73] unit decrease	rs2072134-A	chr12	111893559	A/G	0	0.11	0	0	Yes	-
	49	21270382	Baik I	Am J Clin Nutr	Alcohol consumption	Other	9e-59	1.06	[0.94-1.18] unit decrease	rs2074356-T	chr12	111129784	A/G	0	0.15	0	0	Yes	-
	50	21665994	Kutalik Z	Hum Mol Genet	Alcohol consumption	Other	2e-09	0.12	[0.08-0.16] unit decrease	rs2749097-G	chr1	63900056	C/G	0.168	0.19	0.09091	0.148	Yes	-
	51	21471458	Schumann G	Proc Natl Acad Sci U S A	Alcohol consumption	Other	4e-08	0.01	[-0.003-0.028] unit decrease	rs6943555-A	chr7	69443959	A/T	0.181	0.24	0.2782	0	Yes	-
	52	21314694	Kendler KS	Alcohol Clin Exp Res	Alcohol dependence	Other	4e-06	NR	NR	rs3738443-A	chr1	245414812	C/T	0.205	0.03	0.3902	0.398	Yes	-
	53	21703634	Wang KS	J Psychiatr Res	Alcohol dependence	Other	2e-07	NR	NR	rs6701037-C	chr1	173386702	A/C	0.518	0.46	0.3207	0.318	Yes	-
	54	21314694	Kendler KS	Alcohol Clin Exp Res	Alcohol dependence	Other	4e-07	NR	NR	rs6777876-G	chr3	11931598	A/G	0.093	0.09	0.07586	0.205	Yes	-
	55	19581569	Treutlein J	Arch Gen Psychiatry	Alcohol dependence	Other	1e-08	1.35	[1.22-1.49]	rs7590720-G	chr2	216606903	A/G	0.274	0.29	0.3239	0.489	Yes	-
	56	21876473	Lydall GJ	Psychiatr Genet	Alcohol dependence	Other	4e-06	NR	NR	rs8062326-T	chr16	19063517	A/G	0.031	0.02	0.01724	0.028	Yes	-
	57	21529783	Heath AC	Biol Psychiatry	Alcoholism (12-month weekly alcohol consumption)	Other	3e-06	0.08	[NR] unit increase	rs2154294-G	chr14	41725025	A/G	0.549	0.44	0.4895	0.591	Yes	-
	58	21529783	Heath AC	Biol Psychiatry	Alcoholism (12-month weekly alcohol consumption)	Other	7e-06	0.16	[NR] unit increase	rs237238-A	chr7	75049350	A/G	0.92	0.07	0.92657	0.807	Yes	-
	59	21529783	Heath AC	Biol Psychiatry	Alcoholism (alcohol dependence factor score)	Other	6e-06	0.08	[NR] unit decrease	rs10253361-T	chr7	121062465	C/T	0.562	0.38	0.5417	0.477	Yes	-
	60	21529783	Heath AC	Biol Psychiatry	Alcoholism (alcohol dependence factor score)	Other	7e-06	0.1	[NR] unit decrease	rs933769-T	chr15	93853746	C/T	0.867	0.19	0.7812	0.642	Yes	-
	61	21529783	Heath AC	Biol Psychiatry	Alcoholism (heaviness of drinking)	Other	6e-06	0.1	[NR] unit increase	rs10908907-G	chr9	91439404	A/G	0.739	0.25	0.5909	0.339	Yes	-
	62	21529783	Heath AC	Biol Psychiatry	Alcoholism (heaviness of drinking)	Other	9e-06	0.15	[NR] unit increase	rs1380131-C	chr14	53142608	C/T	0.929	0.07	0.7586	0.767	Yes	-
	63	21529783	Heath AC	Biol Psychiatry	Alcoholism (heaviness of drinking)	Other	9e-06	0.1	[NR] unit increase	rs195204-T	chr1	115535614	C/T	0.765	0.24	0.6172	0.562	Yes	-
	64	21529783	Heath AC	Biol Psychiatry	Alcoholism (heaviness of drinking)	Other	2e-06	0.14	[NR] unit decrease	rs2369955-A	chr3	134176278	A/C	0.836	0.16	0.8207	0.915	Yes	-
	65	22036096	Ramasamy A	J Allergy Clin Immunol	Allergic rhinitis	Other	1e-06	1.15	[1.09-1.21]	rs1044573-A	chr20	25154654	A/G	0.514	0.51	0.3881	0.46	Yes	-
	66	22036096	Ramasamy A	J Allergy Clin Immunol	Allergic rhinitis	Other	2e-06	1.21	[1.12-1.31]	rs216518-A	chr14	59753183	A/C	0.107	0.15	0.1007	0.379	Yes	-
	67	22036096	Ramasamy A	J Allergy Clin Immunol	Allergic rhinitis	Other	1e-06	1.23	[1.13-1.34]	rs6898653-G	chr5	116003555	A/G	0.219	0.22	0.2743	0.261	Yes	-
	68	20596022	Petukhova L	Nature	Alopecia areata	Other	1e-35	2.21	[1.98-2.47]	rs9275572-G	chr6	32786977	A/G	0.606	0.59	0.5105	0.693	Yes	-
	69	22159054	Logue MW	Arch Neurol	Alzheimer's disease	Other	9e-06	1.52	[1.27-1.84]	rs10273775-G	chr7	146528336	A/G	0.54	0.42	0.5786	0.773	Yes	-
	70	22159054	Logue MW	Arch Neurol	Alzheimer's disease	Other	5e-06	1.75	[1.37-2.22]	rs17511627-C	chr13	25622328	A/C	0.159	0.17	0.08621	0.256	Yes	-
	71	22159054	Logue MW	Arch Neurol	Alzheimer's disease	Other	6e-06	1.6	[1.30-1.95]	rs1923775-T	chr4	2072894	C/T	0.721	0.25	0.7138	0.619	Yes	-
	72	17553421	Reiman EM	Neuron	Alzheimer's disease (late onset)	Other	1e-10	4.06	[2.81-14.69]	rs2373115-G	chr11	77768798	A/C	0.872	0.7	0.7103	0.682	Yes	-
	73	21460841	Naj AC	Nat Genet	Alzheimer's disease (late onset)	Other	9e-09	1.11	[1.07-1.15]	rs9349407-C	chr6	47561337	C/G	0.275	0.27	0.2867	0.241	Yes	-
	74	19451621	Landers JE	Proc Natl Acad Sci U S A	Amyotrophic lateral sclerosis	Other	3e-06	0.79	[0.46-1.12] years older	rs11241713-T	chr5	123147464	A/C	0.066	NA	0.07353	0.207	Yes	-
	75	20801717	Shatunov A	Lancet Neurol	Amyotrophic lateral sclerosis	Other	3e-06	1.15	[NR]	rs1488902-C	chr11	88984673	C/T	0.416	NA	0.2698	0.352	Yes	-
	76	19451621	Landers JE	Proc Natl Acad Sci U S A	Amyotrophic lateral sclerosis	Other	8e-06	2	[NR]	rs16856202-C	chr1	230221774	G/T	0.036	0.04	0.02448	0.08	Yes	-
	77	19451621	Landers JE	Proc Natl Acad Sci U S A	Amyotrophic lateral sclerosis	Other	7e-06	3.03	[1.71-4.35] years younger	rs2619566-G	chr3	2599938	A/G	0.093	NA	0.1586	0.415	Yes	-
	78	19451621	Landers JE	Proc Natl Acad Sci U S A	Amyotrophic lateral sclerosis	Other	1e-06	1.41	[NR]	rs7577894-T	chr2	55862408	C/T	0.522	0.39	0.4362	0.42	Yes	-
	79	20066004	Chung CM	Pharmacogenomics J	Angiotensin-converting enzyme activity	Other	3e-25	16.2	[NR] % variance	rs4343-G	chr17	58919763	A/G	0.491	0.31	0.5938	0.375	Yes	-
	80	22199011	Murabito JM	Circ Cardiovasc Genet	Ankle-brachial index	Other	7e-06	0	[0.0022-0.0058] unit decrease	rs4659996-A	chr1	238912747	A/G	0.465	0.48	0.4894	0.443	Yes	-
	81	21743469	Evans DM	Nat Genet	Ankylosing spondylitis	Other	1e-06	NR	NR	rs10781500-T	chr9	138389159	C/T	0.487	0.42	0.437	0.403	Yes	-
	82	21743469	Evans DM	Nat Genet	Ankylosing spondylitis	Other	7e-34	NR	NR	rs10865331-A	chr2	62404976	A/G	0.288	0.37	0.4621	0.398	Yes	-
	83	20062062	Reveille JD	Nat Genet	Ankylosing spondylitis	Other	2e-19	1.27	[1.18-1.37]	rs10865331-A	chr2	62404976	A/G	0.288	0.4	0.4621	0.398	Yes	-
	84	21743469	Evans DM	Nat Genet	Ankylosing spondylitis	Other	2e-17	NR	NR	rs11209026-G	chr1	67478546	A/G	0.959	0.93	0.94964	0	Yes	-
	85	21743469	Evans DM	Nat Genet	Ankylosing spondylitis	Other	9e-11	NR	NR	rs11249215-A	chr1	25169771	A/G	0.482	0.47	0.6042	0.528	Yes	-
	86	22138694	Lin Z	Nat Genet	Ankylosing spondylitis	Other	9e-07	1.15	[1.09-1.22]	rs13210693-A	chr6	109705657	A/G	0.487	0.46	0.4414	0.29	Yes	-
	87	20062062	Reveille JD	Nat Genet	Ankylosing spondylitis	Other	5e-07	1.18	[1.10-1.27]	rs2310173-A	chr2	102030060	G/T	0.42	0.45	0.3986	0.392	Yes	-
	88	21743469	Evans DM	Nat Genet	Ankylosing spondylitis	Other	2e-11	NR	NR	rs378108-G	chr21	39391390	A/G	0.496	0.48	0.4552	0.483	Yes	-
	89	22138694	Lin Z	Nat Genet	Ankylosing spondylitis	Other	9e-10	1.21	[1.14-1.29]	rs4552569-C	chr5	83209349	C/T	0.239	0.28	0.3276	0.159	Yes	-
	90	21743469	Evans DM	Nat Genet	Ankylosing spondylitis	Other	5e-08	NR	NR	rs8070463-C	chr17	43123835	C/T	0.496	0.51	0.4085	0.619	Yes	-
	91	22216198	Athanasiadis G	PLoS One	Anticoagulant levels	Other	4e-09	0.85	[NR] SD units	rs867186-G	chr20	33228215	A/G	0.097	0.077	0.1793	0.148	Yes	-
	92	19584346	Vasan RS	JAMA	Aortic root size	Other	2e-08	0.03	[0.02-0.04] cm increase	rs10770612-G	chr12	20121906	A/G	0.186	0.19	0.08621	0.341	Yes	-
	93	20031579	Tarasov KV	Circ Cardiovasc Genet	Arterial stiffness	Other	5e-08	21	[11.79-30.21] cm/s increase	rs3742207-C	chr13	109616599	G/T	0.323	0.44	0.5	0.364	Yes	-
	94	21804548	Hirota T	Nat Genet	Asthma	Other	1e-16	1.17	[1.13-1.22]	rs1837253-C	chr5	110429771	C/T	0.717	0.35	0.6503	0.528	Yes	-
	95	21804548	Hirota T	Nat Genet	Asthma	Other	1e-10	1.15	[1.10-1.20]	rs2069408-C	chr12	54650588	A/G	0.31	0.23	0.2724	0.176	Yes	-
	96	20860503	Moffatt MF	N Engl J Med	Asthma	Other	1e-08	1.12	[1.08-1.16]	rs2284033-G	chr22	35863980	A/G	0.584	0.56	0.5793	0.529	Yes	-
	97	21907864	Ferreira MA	Lancet	Asthma	Other	2e-08	1.09	[1.06-1.12]	rs4129267-T	chr1	152692888	C/T	0.35	0.37	0.5284	0.278	Yes	-
	98	21150878	Ferreira MA	Eur J Hum Genet	Asthma	Other	5e-07	1.33	[NR]	rs6503525-C	chr17	35348700	C/G	0.496	0.43	0.3889	0.528	Yes	-
	99	21907864	Ferreira MA	Lancet	Asthma	Other	2e-08	1.09	[1.06-1.13]	rs7130588-G	chr11	75948331	A/G	0.381	0.34	0.4248	0.216	Yes	-
	100	20860503	Moffatt MF	N Engl J Med	Asthma	Other	4e-09	1.12	[1.09-1.16]	rs744910-G	chr15	65233839	A/G	0.451	0.49	0.5	0.54	Yes	-
	101	21804548	Hirota T	Nat Genet	Asthma	Other	5e-15	1.17	[1.12-1.21]	rs7775228-A	chr6	32766057	C/T	0.876	0.63	0.8931	0.722	Yes	-
	102	19187332	Kim SH	Clin Exp Allergy	Asthma (toluene diisocyanate-induced)	Other	7e-06	5.29	[2.41-11.61]	rs16937883-G	chr9	20088711	A/G	0.137	0.02	0.07292	0.142	Yes	-
	103	19187332	Kim SH	Clin Exp Allergy	Asthma (toluene diisocyanate-induced)	Other	3e-06	5.2	[2.47-10.92]	rs9319321-T	chr13	26313673	A/T	0.757	0.29	0.7214	0.676	Yes	-
	104	22197932	Paternoster L	Nat Genet	Atopic dermatitis	Other	6e-06	1.09	[1.05-1.13]	rs4821544-C	chr22	35588449	C/T	0.292	0.29	0.3276	0.31	Yes	-
	105	19349984	Esparza-Gordillo J	Nat Genet	Atopic dermatitis	Other	8e-10	1.22	[1.15-1.30]	rs7927894-A	chr11	75978964	C/T	0.394	0.36	0.4586	0.256	Yes	-
	106	20173747	Ellinor PT	Nat Genet	Atrial fibrillation	Other	2e-21	1.52	[1.40-1.64]	rs13376333-T	chr1	153080977	C/T	0.336	0.3	0.3229	0.205	Yes	-
	107	19597492	Benjamin EJ	Nat Genet	Atrial fibrillation	Other	4e-63	1.65		rs17042171-A	chr4	111927736	A/C	0.115	0.12	0.1	0.136	Yes	-
	108	19597492	Benjamin EJ	Nat Genet	Atrial fibrillation	Other	2e-15	1.25		rs2106261-T	chr16	71609121	C/T	0.181	0.174	0.2172	0.188	Yes	-
	109	20173747	Ellinor PT	Nat Genet	Atrial fibrillation	Other	3e-28	2.03	[1.79-2.30]	rs6843082-G	chr4	111937516	A/G	0.212	0.26	0.2518	0.318	Yes	-
	110	19597491	Gudbjartsson DF	Nat Genet	Atrial fibrillation	Other	1e-10	1.21	[1.14-1.29]	rs7193343-T	chr16	71586661	C/T	0.164	NA	0.2862	0.29	Yes	-
	111	17603472	Gudbjartsson DF	Nature	Atrial fibrillation/atrial flutter	Other	3e-41	1.72	[1.59-1.86]	rs2200733-T	chr4	111929618	C/T	0.115	0.11	0.1007	0.136	Yes	-
	112	21041692	Denny JC	Circulation	Atrioventricular conduction	Other	5e-06	2.45	[1.41-3.49] ms increase	rs470490-G	chr18	61182216	G/T	0.487	0.39	0.4441	0.291	Yes	-
	113	21041692	Denny JC	Circulation	Atrioventricular conduction	Other	6e-06	2.42	[1.36-3.48] ms decrease	rs7602460-A	chr2	181970114	A/G	0.389	0.4	0.4965	0.511	Yes	-
	114	18821564	Mick E	Am J Med Genet B Neuropsychiatr Genet	Attention deficit hyperactivity disorder	Other	3e-06	NR	NR	rs11134178-T	chr5	6887167	C/T	0.934	0.05	0.97931	0.955	Yes	-
	115	20732626	Mick E	J Am Acad Child Adolesc Psychiatry	Attention deficit hyperactivity disorder	Other	4e-06	1.42	[NR]	rs2602381-A	chr2	234249063	C/T	0.465	0.48	0.5414	0.324	Yes	-
	116	18821564	Mick E	Am J Med Genet B Neuropsychiatr Genet	Attention deficit hyperactivity disorder	Other	3e-06	NR	NR	rs9627183-C	chr22	46663178	A/G	0.956	0.03	0.91034	0.915	Yes	-
	117	18937294	Lasky-Su J	Am J Med Genet B Neuropsychiatr Genet	Attention deficit hyperactivity disorder (time to onset)	Other	8e-06	NR	NR	rs1335515-C	chr14	57455118	C/T	0.354	NA	0.3357	0.222	Yes	-
	118	18937294	Lasky-Su J	Am J Med Genet B Neuropsychiatr Genet	Attention deficit hyperactivity disorder (time to onset)	Other	4e-06	NR	NR	rs9845475-G	chr3	32817105	G/T	0.133	NA	0.1547	0.102	Yes	-
	119	18951430	Anney RJ	Am J Med Genet B Neuropsychiatr Genet	Attention deficit hyperactivity disorder and conduct disorder	Other	5e-06	NR	NR	rs10229603-C	chr7	112415609	C/T	0.248	0.31	0.3723	0.398	Yes	-
	120	18951430	Anney RJ	Am J Med Genet B Neuropsychiatr Genet	Attention deficit hyperactivity disorder and conduct disorder	Other	1e-06	NR	NR	rs10492664-C	chr13	107614226	C/T	0.81	0.84	0.7008	0.841	Yes	-
	121	18951430	Anney RJ	Am J Med Genet B Neuropsychiatr Genet	Attention deficit hyperactivity disorder and conduct disorder	Other	2e-06	NR	NR	rs10831284-G	chr11	94307612	A/G	0.128	0.13	0.09859	0.057	Yes	-
	122	18951430	Anney RJ	Am J Med Genet B Neuropsychiatr Genet	Attention deficit hyperactivity disorder and conduct disorder	Other	6e-06	NR	NR	rs1381102-A	chr16	62512948	A/G	0.425	0.4	0.4306	0.415	Yes	-
	123	18951430	Anney RJ	Am J Med Genet B Neuropsychiatr Genet	Attention deficit hyperactivity disorder and conduct disorder	Other	9e-06	NR	NR	rs2764980-A	chr10	3274007	A/G	0.509	0.51	0.4828	0.415	Yes	-
	124	18951430	Anney RJ	Am J Med Genet B Neuropsychiatr Genet	Attention deficit hyperactivity disorder and conduct disorder	Other	2e-06	NR	NR	rs2826340-T	chr21	20807173	A/T	0.159	0.17	0.1483	0.142	Yes	-
	125	18951430	Anney RJ	Am J Med Genet B Neuropsychiatr Genet	Attention deficit hyperactivity disorder and conduct disorder	Other	6e-06	NR	NR	rs7236632-A	chr18	53585200	A/G	0.845	0.86	0.91724	0.938	Yes	-
	126	18951430	Anney RJ	Am J Med Genet B Neuropsychiatr Genet	Attention deficit hyperactivity disorder and conduct disorder	Other	4e-06	NR	NR	rs7297018-A	chr12	78586361	A/G	0.168	0.19	0.125	0.178	Yes	-
	127	18951430	Anney RJ	Am J Med Genet B Neuropsychiatr Genet	Attention deficit hyperactivity disorder and conduct disorder	Other	5e-06	NR	NR	rs931812-C	chr8	101988497	C/T	0.664	0.74	0.7762	0.739	Yes	-
	128	18846501	Sonuga-Barke EJ	Am J Med Genet B Neuropsychiatr Genet	Attention deficit hyperactivity disorder symptoms (interaction)	Other	8e-06	0.6	[NR] unit increase	rs10049246-G	chr3	187169435	A/G	0.537	0.59	0.7385	0	Yes	-
	129	19404256	Wang K	Nature	Autism	Other	2e-10	1.19	[NR]	rs4307059-T	chr5	26003460	C/T	0.628	0.61	0.6923	0.619	Yes	-
	130	21700618	Nan H	Hum Mol Genet	Basal cell carcinoma	Other	1e-09	1.24	[1.17-1.31]	rs12210050-T	chr6	420489	C/T	0.159	0.17	0.03333	0.006	Yes	-
	131	20460270	Garcia-Barcelo MM	Hum Mol Genet	Biliary atresia	Other	7e-09	1.77	[1.38-2.26]	rs17095355-T	chr10	111725740	C/T	0.097	0.409	0.3862	0.432	Yes	-
	132	20460270	Garcia-Barcelo MM	Hum Mol Genet	Biliary atresia	Other	9e-06	2.14	[1.58-2.89]	rs2120991-A	chr12	52556495	A/C	0.394	0.134	0.4472	0.432	Yes	-
	133	20460270	Garcia-Barcelo MM	Hum Mol Genet	Biliary atresia	Other	2e-06	2.95	[1.89-4.60]	rs9314986-G	chr13	29356737	G/T	0.354	0.044	0.2	0.273	Yes	-
	134	22085899	Chen G	Eur J Hum Genet	Bilirubin levels	Other	9e-06	0.12	[0.067-0.172] unit increasee	rs11208446-A	chr1	64640940	A/G	0.164	0.275	0.09574	0.199	Yes	-
	135	22085899	Chen G	Eur J Hum Genet	Bilirubin levels	Other	7e-06	0.21	[0.12-0.304] unit increase	rs11843309-T	chr13	69352961	C/T	0	0.062	0	0	Yes	-
	136	22085899	Chen G	Eur J Hum Genet	Bilirubin levels	Other	7e-06	0.22	[0.127-0.321] unit increase	rs12052359-A	chr2	81726433	A/C	0.221	0.062	0.3667	0.324	Yes	-
	137	19414484	Johnson AD	Hum Mol Genet	Bilirubin levels	Other	2e-06	0.02	[0.00-0.04] umol/l decrease in log(tbil)	rs1986655-A	chr4	126212952	A/G	0.824	0.17	0.8451	0.665	Yes	-
	138	22085899	Chen G	Eur J Hum Genet	Bilirubin levels	Other	4e-06	0.19	[0.112-0.276] unit increase	rs2135319-A	chr3	72106390	A/G	0.089	0.081	0.1215	0.136	Yes	-
	139	19414484	Johnson AD	Hum Mol Genet	Bilirubin levels	Other	7e-13	0.05	[0.03-0.07] umol/l increase in log(tbil)	rs4149056-C	chr12	21222816	C/T	0.15	0.15	0.1458	0.023	Yes	-
	140	22085899	Chen G	Eur J Hum Genet	Bilirubin levels	Other	2e-06	0.16	[0.097-0.229] unit decrease	rs4781563-A	chr16	13952900	A/G	0.239	0.156	0.3051	0.244	Yes	-
	141	19414484	Johnson AD	Hum Mol Genet	Bilirubin levels	Other	1e-300	0.23	[0.21-0.25] umol/l increase in log(tbil)	rs6742078-T	chr2	234337378	G/T	0.314	0.32	0.2986	0.415	Yes	-
	142	22085899	Chen G	Eur J Hum Genet	Bilirubin levels	Other	2e-22	0.23	[0.183-0.270] unit increase	rs887829-T	chr2	234333309	C/T	0.314	0.45	0.2972	0.425	Yes	-
	143	19419973	Sanna S	Hum Mol Genet	Bilirubin levels	Other	1e-69	0.57	[0.50-0.63] s.d. decrease	rs887829-T	chr2	234333309	C/T	0.314	0.3	0.2972	0.425	Yes	-
	144	19260141	Zemunik T	Croat Med J	Biochemical measures	Other	5e-06	0.24	[0.14-0.34] mmol/L decrease	rs10777332-A	chr12	90688433	C/T	0.159	0.11	0.2036	0.091	Yes	-
	145	19260141	Zemunik T	Croat Med J	Biochemical measures	Other	8e-06	0.13	[0.08-0.18] mmol/L increase	rs2839619-G	chr21	43309246	A/G	0.513	0.4	0.4861	0.42	Yes	-
	146	19260141	Zemunik T	Croat Med J	Biochemical measures	Other	8e-06	0.13	[0.07-0.19] mmol/L increase	rs2839619-G	chr21	43309246	A/G	0.513	0.4	0.4861	0.42	Yes	-
	147	19260141	Zemunik T	Croat Med J	Biochemical measures	Other	8e-06	0.23	[0.13-0.33] g/L increase	rs6044777-A	chr20	17316542	C/T	0.204	0.17	0.1724	0.119	Yes	-
	148	19396169	Cho YS	Nat Genet	Biomedical quantitative traits	Other	2e-09	0.66	[0.45-0.87] beats per minute increase	rs12110693-A	chr6	122199969	A/G	0.093	0.49	0.06204	0.057	Yes	-
	149	19396169	Cho YS	Nat Genet	Biomedical quantitative traits	Other	3e-09	1.09	[0.72-1.44] beats per minute increase	rs12731740-T	chr1	206091443	C/T	0.111	0.1	0.08621	0.102	Yes	-
	150	19396169	Cho YS	Nat Genet	Biomedical quantitative traits	Other	3e-06	0.63	[0.37-0.89] mm Hg decrease	rs17249754-A	chr12	88584717	A/G	0.877	0.37	0.7867	0.603	Yes	-
	151	19396169	Cho YS	Nat Genet	Biomedical quantitative traits	Other	1e-07	1.06	[0.67-1.45] mm Hg decrease	rs17249754-A	chr12	88584717	A/G	0.877	0.37	0.7867	0.603	Yes	-
	152	19396169	Cho YS	Nat Genet	Biomedical quantitative traits	Other	8e-12	0.01	[0.004-0.008] decrease	rs2074356-T	chr12	111129784	A/G	0	0.15	0	0	Yes	-
	153	19396169	Cho YS	Nat Genet	Biomedical quantitative traits	Other	2e-06	NR	NR	rs7776725-C	chr7	120820357	C/T	0.277	0.13	0.1937	0.21	Yes	-
	154	19396169	Cho YS	Nat Genet	Biomedical quantitative traits	Other	1e-11	NR	NR	rs7776725-C	chr7	120820357	C/T	0.277	0.13	0.1937	0.21	Yes	-
	155	19396169	Cho YS	Nat Genet	Biomedical quantitative traits	Other	2e-07	0.24	[0.14-0.32] kg/m2 increase	rs9939609-A	chr16	52378028	A/T	0.46	0.13	0.412	0.267	Yes	-
	156	18711365	Ferreira MA	Nat Genet	Bipolar disorder	Other	7e-08	1.18	[NR]	rs1006737-A	chr12	2215556	A/G	0.348	0.32	0.2867	0.27	Yes	-
	157	17554300	WTCCC	Nature	Bipolar disorder	Other	7e-06	1.45	[1.24-1.68]	rs10134944-T	chr14	57188949	C/T	0.08	0.09	0.04745	0.148	Yes	-
	158	21738484	Smith EN	PLoS Genet	Bipolar disorder	Other	9e-06	1.27	[NR]	rs1038094-G	chr15	71799490	A/G	0.875	NA	0.90278	0.71	Yes	-
	159	19416921	Scott LJ	Proc Natl Acad Sci U S A	Bipolar disorder	Other	2e-07	1.19	[1.11-1.27]	rs1042779-A	chr3	52796051	A/G	0.696	0.63	0.6844	0.642	Yes	-
	160	21353194	Cichon S	Am J Hum Genet	Bipolar disorder	Other	2e-09	1.17	[NR]	rs1064395-A	chr19	19222735	A/G	0.15	0.16	0.1294	0.21	Yes	-
	161	17554300	WTCCC	Nature	Bipolar disorder	Other	8e-06	1.13	[0.89-1.44]	rs11622475-C	chr14	103578829	C/T	0.75	0.7	0.6643	0.557	Yes	-
	162	18711365	Ferreira MA	Nat Genet	Bipolar disorder	Other	4e-06	1.2	[NR]	rs12290811-A	chr11	78761268	A/T	0.124	0.15	0.1345	0.04	Yes	-
	163	18711365	Ferreira MA	Nat Genet	Bipolar disorder	Other	5e-06	1.3	[NR]	rs12436436-C	chr14	23451355	C/T	0.093	0.08	0.04196	0.074	Yes	-
	164	21926972	Sklar P	Nat Genet	Bipolar disorder	Other	3e-06	1.1	[NR]	rs12912251-G	chr15	36773660	G/T	0.799	NA	0.7482	0.824	Yes	-
	165	21738484	Smith EN	PLoS Genet	Bipolar disorder	Other	2e-06	1.17	[NR]	rs17197037-A	chr14	20795494	A/G	0.403	NA	0.3897	0.398	Yes	-
	166	19488044	Smith EN	Mol Psychiatry	Bipolar disorder	Other	2e-06	1.74	[NR]	rs2111504-T	chr19	37609295	A/T	0.823	0.23	0.8924	0.878	Yes	-
	167	18711365	Ferreira MA	Nat Genet	Bipolar disorder	Other	4e-06	1.15	[NR]	rs216345-T	chr9	33789370	C/T	0.376	0.37	0.3531	0.42	Yes	-
	168	20386566	Lee MT	Mol Psychiatry	Bipolar disorder	Other	5e-07	1.44	[1.25-1.66] (GG genotype)	rs2709736-G	chr7	20828827	C/T	0.558	NA	0.5759	0.523	Yes	-
	169	17554300	WTCCC	Nature	Bipolar disorder	Other	7e-06	1.84	[1.31-2.58]	rs2953145-C	chr2	241164269	C/G	0.801	0.23	0.5804	0.767	Yes	-
	170	21738484	Smith EN	PLoS Genet	Bipolar disorder	Other	3e-06	1.16	[NR]	rs2989476-C	chr1	60831847	C/G	0.407	NA	0.4607	0.724	Yes	-
	171	17554300	WTCCC	Nature	Bipolar disorder	Other	7e-06	1.03	[1.15-1.23]	rs3761218-C	chr20	3724175	C/T	0.451	0.64	0.2378	0.511	Yes	-
	172	21926972	Sklar P	Nat Genet	Bipolar disorder	Other	2e-06	1.1	[NR]	rs3845817-T	chr2	65612029	C/T	0.434	NA	0.2867	0.25	Yes	-
	173	17554300	WTCCC	Nature	Bipolar disorder	Other	6e-08	2.08	[1.60-2.71]	rs420259-A	chr16	23541527	A/G	0.801	0.72	0.7257	0.71	Yes	-
	174	22182935	Chen DT	Mol Psychiatry	Bipolar disorder	Other	8e-09	NR	NR	rs4650608-T	chr1	79010603	C/T	0.664	NA	0.869	0.812	Yes	-
	175	21738484	Smith EN	PLoS Genet	Bipolar disorder	Other	9e-06	1.59	[NR]	rs4770394-A	chr13	22590978	A/G	0.973	NA	0.95035	0.744	Yes	-
	176	18711365	Ferreira MA	Nat Genet	Bipolar disorder	Other	6e-06	1.22	[NR]	rs544368-T	chr11	124043205	C/T	0.097	0.12	0.08993	0.085	Yes	-
	177	19416921	Scott LJ	Proc Natl Acad Sci U S A	Bipolar disorder	Other	7e-06	1.23	[1.13-1.35]	rs6494849-A	chr15	68267668	A/C	0.143	0.12	0.3346	0.25	Yes	-
	178	21926972	Sklar P	Nat Genet	Bipolar disorder	Other	2e-06	1.1	[NR]	rs6746896-A	chr2	96774676	A/G	0.681	NA	0.7797	0.835	Yes	-
	179	17554300	WTCCC	Nature	Bipolar disorder	Other	5e-06	1.47	[1.26-1.71]	rs683395-G	chr3	184352512	A/G	0.093	0.08	0.1042	0.074	Yes	-
	180	21738484	Smith EN	PLoS Genet	Bipolar disorder	Other	9e-06	1.23	[NR]	rs7747960-A	chr6	152833167	A/C	0.128	NA	0.1724	0.205	Yes	-
	181	18711365	Ferreira MA	Nat Genet	Bipolar disorder	Other	5e-06	1.59	[NR]	rs8015959-T	chr14	32550673	C/T	0.027	0.02	0.03472	0	Yes	-
	182	21926972	Sklar P	Nat Genet	Bipolar disorder	Other	7e-07	1.1	[NR]	rs9371601-T	chr6	152832266	G/T	0.332	NA	0.5069	0.477	Yes	-
	183	22182935	Chen DT	Mol Psychiatry	Bipolar disorder	Other	1e-12	NR	NR	rs9834970-C	chr3	36831034	C/T	0.549	NA	0.5669	0.523	Yes	-
	184	20351715	Liu Y	Mol Psychiatry	Bipolar disorder and major depressive disorder (combined)	Other	3e-08	1.18	[NR] (bipolar)	rs1006737-A	chr12	2215556	A/G	0.348	0.36	0.2867	0.27	Yes	-
	185	20351715	Liu Y	Mol Psychiatry	Bipolar disorder and major depressive disorder (combined)	Other	1e-06	NR	NR	rs12912251-T	chr15	36773660	G/T	0.201	NA	0.2518	0.176	Yes	-
	186	20889312	Wang KS	Schizophr Res	Bipolar disorder and schizophrenia	Other	7e-07	1.39	[NR]	rs10496702-G	chr2	133722039	A/G	0.885	NA	0.8862	0.852	Yes	-
	187	20889312	Wang KS	Schizophr Res	Bipolar disorder and schizophrenia	Other	4e-06	1.37	[NR]	rs10929808-G	chr2	12486447	A/G	0.155	NA	0.2832	0.381	Yes	-
	188	20889312	Wang KS	Schizophr Res	Bipolar disorder and schizophrenia	Other	1e-07	1.27	[NR]	rs10949808-T	chr7	155741410	G/T	0.438	NA	0.3936	0.517	Yes	-
	189	20889312	Wang KS	Schizophr Res	Bipolar disorder and schizophrenia	Other	2e-06	1.23	[NR]	rs11042937-T	chr11	10701970	G/T	0.544	NA	0.5759	0.591	Yes	-
	190	20889312	Wang KS	Schizophr Res	Bipolar disorder and schizophrenia	Other	3e-06	1.89	[NR]	rs11072089-C	chr15	67437107	C/T	0.04	NA	0.1146	0.062	Yes	-
	191	20889312	Wang KS	Schizophr Res	Bipolar disorder and schizophrenia	Other	2e-06	1.24	[NR]	rs1107592-T	chr7	2007958	A/G	0.664	NA	0.587	0.703	Yes	-
	192	20889312	Wang KS	Schizophr Res	Bipolar disorder and schizophrenia	Other	4e-06	1.25	[NR]	rs11097407-G	chr4	95365158	C/G	0.686	NA	0.7083	0.551	Yes	-
	193	20889312	Wang KS	Schizophr Res	Bipolar disorder and schizophrenia	Other	3e-06	1.23	[NR]	rs11239177-T	chr10	44443385	C/T	0.58	NA	0.6701	0.5	Yes	-
	194	20889312	Wang KS	Schizophr Res	Bipolar disorder and schizophrenia	Other	1e-06	1.56	[NR]	rs11740562-C	chr5	156874863	A/G	0.075	NA	0.09655	0.006	Yes	-
	195	20889312	Wang KS	Schizophr Res	Bipolar disorder and schizophrenia	Other	6e-09	1.29	[NR]	rs11789399-G	chr9	120399107	A/G	0.438	NA	0.6621	0.79	Yes	-
	196	20889312	Wang KS	Schizophr Res	Bipolar disorder and schizophrenia	Other	2e-06	1.44	[NR]	rs11880706-G	chr19	6031482	C/G	0.093	NA	0.1276	0.085	Yes	-
	197	20889312	Wang KS	Schizophr Res	Bipolar disorder and schizophrenia	Other	4e-08	1.31	[NR]	rs12201676-C	chr6	89788820	C/T	0.217	NA	0.2931	0.324	Yes	-
	198	20889312	Wang KS	Schizophr Res	Bipolar disorder and schizophrenia	Other	1e-06	1.67	[NR]	rs12282742-A	chr11	18222375	C/T	0.049	NA	0.03819	0.017	Yes	-
	199	20889312	Wang KS	Schizophr Res	Bipolar disorder and schizophrenia	Other	8e-07	1.25	[NR]	rs12745968-T	chr1	93174425	A/G	0.659	NA	0.7393	0.778	Yes	-
	200	20889312	Wang KS	Schizophr Res	Bipolar disorder and schizophrenia	Other	1e-06	2.33	[NR]	rs17069122-T	chr6	108430452	A/G	0.018	NA	0.006897	0.136	Yes	-
	201	20889312	Wang KS	Schizophr Res	Bipolar disorder and schizophrenia	Other	3e-06	2.41	[NR]	rs17111920-A	chr14	26476732	G/T	0.004	NA	0	0	Yes	-
	202	20889312	Wang KS	Schizophr Res	Bipolar disorder and schizophrenia	Other	1e-06	1.44	[NR]	rs1806864-C	chr9	89221489	C/G	0.133	NA	0.04138	0.011	Yes	-
	203	20889312	Wang KS	Schizophr Res	Bipolar disorder and schizophrenia	Other	2e-07	1.56	[NR]	rs1992045-T	chr8	59003478	C/T	0.084	NA	0.04483	0.098	Yes	-
	204	20889312	Wang KS	Schizophr Res	Bipolar disorder and schizophrenia	Other	1e-06	1.24	[NR]	rs2018368-G	chr11	10696942	C/G	0.544	NA	0.5764	0.591	Yes	-
	205	20889312	Wang KS	Schizophr Res	Bipolar disorder and schizophrenia	Other	5e-07	1.3	[NR]	rs2044117-C	chr13	100506311	A/G	0.754	NA	0.7069	0.869	Yes	-
	206	20889312	Wang KS	Schizophr Res	Bipolar disorder and schizophrenia	Other	2e-06	1.31	[NR]	rs240444-A	chr21	10023882	C/T	0.769	NA	0.8759	0.801	Yes	-
	207	20889312	Wang KS	Schizophr Res	Bipolar disorder and schizophrenia	Other	2e-07	1.27	[NR]	rs2509843-C	chr11	97630614	A/G	0.372	NA	0.3058	0.534	Yes	-
	208	20889312	Wang KS	Schizophr Res	Bipolar disorder and schizophrenia	Other	2e-06	1.24	[NR]	rs252817-G	chr5	106752487	C/T	0.363	NA	0.4621	0.575	Yes	-
	209	20889312	Wang KS	Schizophr Res	Bipolar disorder and schizophrenia	Other	3e-06	2.09	[NR]	rs2774292-A	chr1	114517107	A/G	0.005	NA	0.003472	0.119	Yes	-
	210	20889312	Wang KS	Schizophr Res	Bipolar disorder and schizophrenia	Other	1e-06	1.36	[NR]	rs2841307-T	chr6	100863408	C/T	0.131	NA	0.1131	0	Yes	-
	211	20889312	Wang KS	Schizophr Res	Bipolar disorder and schizophrenia	Other	3e-06	1.28	[NR]	rs435746-A	chr16	76473692	A/T	0.217	NA	0.1241	0.295	Yes	-
	212	20889312	Wang KS	Schizophr Res	Bipolar disorder and schizophrenia	Other	3e-06	1.23	[NR]	rs493187-G	chr6	87523211	A/G	0.398	NA	0.493	0.466	Yes	-
	213	20889312	Wang KS	Schizophr Res	Bipolar disorder and schizophrenia	Other	4e-07	1.28	[NR]	rs4949526-T	chr1	30204806	C/T	0.345	NA	0.5208	0.545	Yes	-
	214	20889312	Wang KS	Schizophr Res	Bipolar disorder and schizophrenia	Other	1e-07	1.28	[NR]	rs4996815-C	chr13	105449662	G/T	0.336	NA	0.4514	0.409	Yes	-
	215	20889312	Wang KS	Schizophr Res	Bipolar disorder and schizophrenia	Other	1e-06	1.24	[NR]	rs6024905-C	chr20	36391251	A/G	0.544	NA	0.5693	0.58	Yes	-
	216	20889312	Wang KS	Schizophr Res	Bipolar disorder and schizophrenia	Other	4e-07	1.28	[NR]	rs6046396-G	chr20	19800503	A/G	0.279	NA	0.3552	0.432	Yes	-
	217	20889312	Wang KS	Schizophr Res	Bipolar disorder and schizophrenia	Other	6e-07	1.33	[NR]	rs6444931-T	chr3	171646168	A/G	0.841	NA	0.93056	0.909	Yes	-
	218	20889312	Wang KS	Schizophr Res	Bipolar disorder and schizophrenia	Other	2e-06	1.25	[NR]	rs6952808-C	chr7	1853061	C/G	0.332	NA	0.3546	0.426	Yes	-
	219	20889312	Wang KS	Schizophr Res	Bipolar disorder and schizophrenia	Other	1e-06	1.3	[NR]	rs7248363-G	chr19	18328886	C/T	0.774	NA	0.8621	0.801	Yes	-
	220	20889312	Wang KS	Schizophr Res	Bipolar disorder and schizophrenia	Other	4e-06	1.25	[NR]	rs7319311-A	chr13	109828579	A/G	0.655	NA	0.8102	0.807	Yes	-
	221	20889312	Wang KS	Schizophr Res	Bipolar disorder and schizophrenia	Other	3e-06	1.23	[NR]	rs7386474-C	chr8	142428732	A/G	0.513	NA	0.5071	0.557	Yes	-
	222	20889312	Wang KS	Schizophr Res	Bipolar disorder and schizophrenia	Other	2e-06	1.29	[NR]	rs7512769-T	chr1	194309285	A/T	0.775	NA	0.8545	0.949	Yes	-
	223	20889312	Wang KS	Schizophr Res	Bipolar disorder and schizophrenia	Other	4e-06	1.3	[NR]	rs7533906-G	chr1	79906711	C/T	0.783	NA	0.779	0.822	Yes	-
	224	20889312	Wang KS	Schizophr Res	Bipolar disorder and schizophrenia	Other	1e-06	1.31	[NR]	rs7727102-G	chr5	4773585	C/G	0.81	NA	0.8276	0.801	Yes	-
	225	20889312	Wang KS	Schizophr Res	Bipolar disorder and schizophrenia	Other	2e-06	2.26	[NR]	rs7799181-C	chr7	145679763	A/G	0.018	NA	0.02098	0.034	Yes	-
	226	20889312	Wang KS	Schizophr Res	Bipolar disorder and schizophrenia	Other	2e-07	2.03	[NR]	rs802568-C	chr7	145590176	G/T	0.022	NA	0.05172	0.097	Yes	-
	227	20889312	Wang KS	Schizophr Res	Bipolar disorder and schizophrenia	Other	2e-06	1.23	[NR]	rs915071-A	chr14	31503609	C/T	0.518	NA	0.6	0.636	Yes	-
	228	20889312	Wang KS	Schizophr Res	Bipolar disorder and schizophrenia	Other	2e-06	1.34	[NR]	rs9377619-G	chr6	104700560	A/G	0.177	NA	0.1793	0.178	Yes	-
	229	20889312	Wang KS	Schizophr Res	Bipolar disorder and schizophrenia	Other	4e-06	1.62	[NR]	rs992564-G	chr11	130841284	G/T	0.938	NA	0.96181	0.898	Yes	-
	230	20889312	Wang KS	Schizophr Res	Bipolar disorder and schizophrenia	Other	1e-06	1.28	[NR]	rs993804-C	chr3	25087175	C/T	0.248	NA	0.3881	0.352	Yes	-
	231	18483556	Han J	PLoS Genet	Black vs. blond hair color	Other	4e-103	0.44	[0.40-0.48] decrease in hair color score	rs12913832-A	chr15	26039213	A/G	0.208	NA	0.723	0.909	Yes	-
	232	18483556	Han J	PLoS Genet	Black vs. red hair color	Other	1e-77	0.44	[0.40-0.48] decrease in hair color score	rs12913832-A	chr15	26039213	A/G	0.208	NA	0.723	0.909	Yes	-
	233	18483556	Han J	PLoS Genet	Black vs. red hair color	Other	2e-23	0.36	[0.28-0.44] increase in hair color score	rs258322-T	chr16	88283404	A/G	0.137	NA	0.04483	0.091	Yes	-
	234	20972438	Rothman N	Nat Genet	Bladder cancer	Other	5e-07	1.11	[1.07-1.16]	rs401681-C	chr5	1375087	C/T	0.566	0.54	0.7007	0.79	Yes	-
	235	20972438	Rothman N	Nat Genet	Bladder cancer	Other	4e-13	1.2	[1.14-1.26]	rs798766-T	chr4	1704037	C/T	0.199	0.19	0.3586	0.199	Yes	-
	236	20972438	Rothman N	Nat Genet	Bladder cancer	Other	2e-18	1.21	[1.16-1.27]	rs9642880-T	chr8	128787250	G/T	0.425	0.45	0.4828	0.642	Yes	-
	237	21106707	Gu J	Hum Mol Genet	Bleomycin sensitivity	Other	3e-08	0.18	[0.12-0.24] more chromatid breaks	rs8093763-A	chr18	55654358	A/G	0.257	0.25	0.2586	0.42	Yes	-
	238	17952075	Sulem P	Nat Genet	Blond vs. brown hair color	Other	4e-30	2.32	[1.86-2.92]	rs12821256-C	chr12	87852466	C/T	0.146	0.14	0.04167	0.023	Yes	-
	239	21572416	Kato N	Nat Genet	Blood pressure	Other	8e-31	1.56	[1.31-1.81] mm Hg increase	rs11066280-T	chr12	111302166	A/T	1	0.75	1	0	Yes	-
	240	21572416	Kato N	Nat Genet	Blood pressure	Other	1e-35	1.01	[0.85-1.17] mm Hg increase	rs11066280-T	chr12	111302166	A/T	1	0.75	1	0	Yes	-
	241	21909110	Wain LV	Nat Genet	Blood pressure	Other	8e-11	0.53	[0.37-0.69] mmHg increase	rs11191548-T	chr10	104836168	C/T	0.925	0.94	0.743	0.724	Yes	-
	242	21572416	Kato N	Nat Genet	Blood pressure	Other	7e-12	0.58	[0.42-0.74] mm Hg increase	rs11191548-T	chr10	104836168	C/T	0.925	0.74	0.743	0.724	Yes	-
	243	21572416	Kato N	Nat Genet	Blood pressure	Other	4e-17	1.18	[0.91-1.45] mm Hg increase	rs11191548-T	chr10	104836168	C/T	0.925	0.74	0.743	0.724	Yes	-
	244	21909110	Wain LV	Nat Genet	Blood pressure	Other	2e-11	0.34	[0.24-0.44] mmHg increase	rs11222084-T	chr11	129778440	A/T	0.403	0.38	0.2624	0.25	Yes	-
	245	21909110	Wain LV	Nat Genet	Blood pressure	Other	4e-09	0.28	[0.19-0.37] mmHg increase	rs1173771-G	chr5	32850785	A/G	0.509	0.53	0.5786	0.625	Yes	-
	246	21909110	Wain LV	Nat Genet	Blood pressure	Other	5e-09	0.28	[0.18-0.37] mmHg increase	rs1173771-G	chr5	32850785	A/G	0.509	0.53	0.5786	0.625	Yes	-
	247	21909110	Wain LV	Nat Genet	Blood pressure	Other	2e-07	0.25	[0.16-0.35] mmHg increase	rs12940887-T	chr17	44757806	C/T	0.406	0.42	0.2426	0.159	Yes	-
	248	21909110	Wain LV	Nat Genet	Blood pressure	Other	2e-08	0.31	[0.20-0.42] mmHg decrease	rs13002573-G	chr2	164623454	A/G	0.748	0.2	0.6796	0.727	Yes	-
	249	21909110	Wain LV	Nat Genet	Blood pressure	Other	4e-08	0.26	[0.17-0.35] mmHg increase	rs1327235-G	chr20	10917030	A/G	0.522	0.58	0.4306	0.455	Yes	-
	250	21909110	Wain LV	Nat Genet	Blood pressure	Other	2e-15	0.39	[0.29-0.48] mmHg increase	rs1378942-C	chr15	72864420	A/C	0.321	0.33	0.6076	0.869	Yes	-
	251	21909110	Wain LV	Nat Genet	Blood pressure	Other	6e-10	0.39	[0.27-0.52] mmHg increase	rs17249754-G	chr12	88584717	A/G	0.877	0.89	0.7867	0.603	Yes	-
	252	21909110	Wain LV	Nat Genet	Blood pressure	Other	1e-17	0.56	[0.43-0.69] mmHg increase	rs17249754-G	chr12	88584717	A/G	0.877	0.89	0.7867	0.603	Yes	-
	253	21572416	Kato N	Nat Genet	Blood pressure	Other	8e-20	1.17	[0.92-1.42] mm Hg increase	rs17249754-G	chr12	88584717	A/G	0.877	0.64	0.7867	0.603	Yes	-
	254	21572416	Kato N	Nat Genet	Blood pressure	Other	2e-13	0.58	[0.42-0.74] mm Hg increase	rs17249754-G	chr12	88584717	A/G	0.877	0.64	0.7867	0.603	Yes	-
	255	21909110	Wain LV	Nat Genet	Blood pressure	Other	2e-16	0.53	[0.40-0.66] mmHg decrease	rs17367504-G	chr1	11785365	A/G	0.832	0.17	0.8273	0.824	Yes	-
	256	21909110	Wain LV	Nat Genet	Blood pressure	Other	4e-06	0.23	[0.13-0.32] mmHg increase	rs2384550-G	chr12	113837114	A/G	0.633	0.66	0.6181	0.619	Yes	-
	257	21572416	Kato N	Nat Genet	Blood pressure	Other	8e-07	0.63	[0.38-0.88] mm Hg increase	rs35444-A	chr12	114036820	A/G	0.588	0.75	0.5241	0.534	Yes	-
	258	21572416	Kato N	Nat Genet	Blood pressure	Other	1e-10	0.5	[0.34-0.66] mm Hg increase	rs35444-A	chr12	114036820	A/G	0.588	0.75	0.5241	0.534	Yes	-
	259	21909110	Wain LV	Nat Genet	Blood pressure	Other	8e-07	0.3	[0.18-0.42] mmHg increase	rs3774372-T	chr3	41852418	C/T	0.763	0.78	0.8621	0.818	Yes	-
	260	21909110	Wain LV	Nat Genet	Blood pressure	Other	7e-20	0.43	[0.34-0.52] mmHg decrease	rs653178-T	chr12	110492139	C/T	0.438	0.59	0.3964	0.131	Yes	-
	261	21909110	Wain LV	Nat Genet	Blood pressure	Other	4e-07	0.38	[0.23-0.53] mmHg decrease	rs7129220-G	chr11	10307114	A/G	0.106	0.87	0.05986	0.04	Yes	-
	262	21909110	Wain LV	Nat Genet	Blood pressure	Other	1e-11	0.34	[0.24-0.44] mmHg decrease	rs9313772-T	chr5	157737035	C/T	0.69	0.32	0.6	0.659	Yes	-
	263	21909110	Wain LV	Nat Genet	Blood pressure	Other	5e-09	0.27	[0.18-0.36] mmHg decrease	rs9663362-G	chr10	95885167	C/G	0.451	0.53	0.3849	0.545	Yes	-
	264	17952075	Sulem P	Nat Genet	Blue vs. green eyes	Other	3e-12	1.52	[1.28-1.81]	rs1393350-A	chr11	88650694	A/G	0.226	0.27	0.1581	0.114	Yes	-
	265	18488028	Sulem P	Nat Genet	Blue vs. green eyes	Other	6e-17	1.4	[1.25-1.57]	rs1408799-C	chr9	12662097	C/T	0.695	0.75	0.5139	0.324	Yes	-
	266	19268274	Liu XG	Am J Hum Genet	Body mass (lean)	Other	4e-10	0.1	[0.04-0.16] kg increase	rs7832552-T	chr8	110184852	C/T	0.327	0.32	0.3901	0.415	Yes	-
	267	21037115	Wan ES	Am J Respir Cell Mol Biol	Body mass in chronic obstructive pulmonary disease	Other	4e-08	NR	NR	rs8050136-A	chr16	52373776	A/C	0.46	0.39	0.4161	0.261	Yes	-
	268	19851299	Johansson A	Obesity (Silver Spring)	Body mass index	Obesity	6e-06	0.12	[NR] kg increase	rs1024889-G	chr3	70546020	A/G	0.332	0.28	0.2448	0.176	Yes	-
	269	19079261	Willer CJ	Nat Genet	Body mass index	Obesity	1e-06	NR	NR	rs10769908-C	chr11	8440665	C/T	0.571	0.53	0.3357	0.295	Yes	-
	270	19079261	Willer CJ	Nat Genet	Body mass index	Obesity	2e-08	0.06	[-0.01-0.13] kg/m2 increase	rs11084753-G	chr19	39013977	A/G	0.69	0.67	0.6713	0.636	Yes	-
	271	19079261	Willer CJ	Nat Genet	Body mass index	Obesity	7e-06	NR	NR	rs12324805-C	chr15	80139255	A/C	0.296	0.31	0.3586	0.523	Yes	-
	272	19851299	Johansson A	Obesity (Silver Spring)	Body mass index	Obesity	6e-06	0.16	[NR] kg decrease	rs12517906-G	chr5	180103425	C/T	0.85	0.85	0.8724	0.153	No	Duplicated
	273	20966902	Croteau-Chonka DC	Obesity (Silver Spring)	Body mass index	Obesity	4e-06	0.06	[0.04-0.08] unit increase	rs1440072-C	chr2	223644982	C/T	0.058	NonEuro	0.07746	0.062	No	Duplicated
	274	20935630	Speliotes EK	Nat Genet	Body mass index	Obesity	8e-14	0.07	[0.03-0.11] kg/m2 increase	rs1514175-A	chr1	74764232	A/G	0.46	0.43	0.5	0.42	Yes	-
	275	20935630	Speliotes EK	Nat Genet	Body mass index	Obesity	4e-10	0.06	[0.02-0.10] kg/m2 increase	rs1555543-C	chr1	96717385	A/C	0.588	0.59	0.5315	0.409	Yes	-
	276	19079261	Willer CJ	Nat Genet	Body mass index	Obesity	5e-18	0.2	[0.12-0.28] kg/m2 increase	rs17782313-C	chr18	56002077	C/T	0.265	0.21	0.1958	0.301	No	LD to rs571312
	277	18454148	Loos RJ	Nat Genet	Body mass index	Obesity	3e-15	0.05	[0.04-0.06] unit increase in log(BMI)	rs17782313-C	chr18	56002077	C/T	0.265	0.24	0.1958	0.301	No	Duplicated
	278	21701570	Ng MC	Obesity (Silver Spring)	Body mass index	Obesity	6e-06	0.09	[0.05-0.13] s.d. increase	rs2033195-C	chr5	153489789	C/T	0.434	NonEuro	0.521	0.5	Yes	-
	279	19079261	Willer CJ	Nat Genet	Body mass index	Obesity	6e-06	NR	NR	rs2145270-T	chr20	6569685	C/T	0.588	0.65	0.5252	0.58	Yes	-
	280	20397748	Liu JZ	Twin Res Hum Genet	Body mass index	Obesity	4e-07	0.09	[0.05-0.13] SD decrease	rs2275215-T	chr6	129903085	C/T	0.748	0.73	0.7345	0.523	Yes	-
	281	20935630	Speliotes EK	Nat Genet	Body mass index	Obesity	2e-22	0.13	[0.09-0.17] kg/m2 increase	rs2815752-A	chr1	72585028	A/G	0.637	0.61	0.7379	0.614	Yes	-
	282	19079261	Willer CJ	Nat Genet	Body mass index	Obesity	6e-08	0.1	[0.04-0.16] kg/m2 increase	rs2815752-A	chr1	72585028	A/G	0.637	0.62	0.7379	0.614	No	Duplicated
	283	20935630	Speliotes EK	Nat Genet	Body mass index	Obesity	2e-12	0.06	[0.02-0.10] kg/m2 increase	rs3817334-T	chr11	47607569	C/T	0.412	0.41	0.3786	0.284	Yes	-
	284	20935630	Speliotes EK	Nat Genet	Body mass index	Obesity	4e-23	0.22	[0.16-0.28] kg/m2 increase	rs543874-G	chr1	176156103	A/G	0.243	0.19	0.1103	0.182	Yes	-
	285	20935630	Speliotes EK	Nat Genet	Body mass index	Obesity	6e-42	0.23	[0.17-0.29] kg/m2 increase	rs571312-A	chr18	55990749	A/C	0.263	0.24	0.1805	0.3	Yes	-
	286	19079260	Thorleifsson G	Nat Genet	Body mass index	Obesity	5e-10	4.58	[3.07-6.09] % SD	rs6265-G	chr11	27636492	C/T	0.805	0.85	0.8759	0.841	Yes	-
	287	19079261	Willer CJ	Nat Genet	Body mass index	Obesity	1e-18	0.26	[0.19-0.34] kg/m2 increase	rs6548238-C	chr2	624905	C/T	0.85	0.84	0.91154	0.89	Yes	-
	288	21701570	Ng MC	Obesity (Silver Spring)	Body mass index	Obesity	2e-06	0.17	[0.10-0.24] s.d. increase	rs6794092-G	chr3	173041038	A/G	0.978	NonEuro	0.98966	0.983	Yes	-
	289	20935630	Speliotes EK	Nat Genet	Body mass index	Obesity	6e-22	0.14	[0.10-0.18] kg/m2 increase	rs713586-C	chr2	25011512	C/T	0.473	0.47	0.2669	0.437	Yes	-
	290	20935630	Speliotes EK	Nat Genet	Body mass index	Obesity	2e-17	0.12	[0.08-0.16] kg/m2 increase	rs7138803-A	chr12	48533735	A/G	0.345	0.38	0.3556	0.42	Yes	-
	291	19079260	Thorleifsson G	Nat Genet	Body mass index	Obesity	1e-07	3.28	[2.06-4.50] % SD	rs7138803-A	chr12	48533735	A/G	0.345	0.37	0.3556	0.42	No	Duplicated
	292	19079260	Thorleifsson G	Nat Genet	Body mass index	Obesity	8e-06	3.15	[1.78-4.52] % SD	rs7481311-T	chr11	27539705	C/T	0.805	0.76	0.8759	0.841	No	Duplicated
	293	19079260	Thorleifsson G	Nat Genet	Body mass index	Obesity	1e-47	8.04	[6.96-9.12] % SD	rs8050136-A	chr16	52373776	A/C	0.46	0.41	0.4161	0.261	No	LD to rs9939609
	294	20935630	Speliotes EK	Nat Genet	Body mass index	Obesity	1e-07	NR	NR	rs867559-G	chr9	128505146	A/G	0.237	0.22	0.1329	0.227	Yes	-
	295	20935630	Speliotes EK	Nat Genet	Body mass index	Obesity	3e-20	0.13	[0.07-0.19] kg/m2 increase	rs987237-G	chr6	50911009	A/G	0.164	0.18	0.1828	0.284	Yes	-
	296	20966902	Croteau-Chonka DC	Obesity (Silver Spring)	Body mass index	Obesity	9e-06	0.05	[0.02-0.07] unit increase	rs9906155-T	chr17	73213292	C/T	0.938	0.91	0.97241	0.932	Yes	-
	297	19079261	Willer CJ	Nat Genet	Body mass index	Obesity	4e-51	0.33	[0.27-0.39] kg/m2 increase	rs9939609-A	chr16	52378028	A/T	0.46	0.41	0.412	0.267	Yes	-
	298	17434869	Frayling TM	Science	Body mass index	Obesity	2e-20	0.36	[NR] kg/m2 per copy in adults	rs9939609-A	chr16	52378028	A/T	0.46	0.39	0.412	0.267	No	Duplicated
	299	19249006	Xiong DH	Am J Hum Genet	Bone mineral density	Other	2e-08	1	% [NR] of variance explained	rs11864477-C	chr16	75985270	C/T	0.066	0.12	0.0979	0.131	Yes	-
	300	19249006	Xiong DH	Am J Hum Genet	Bone mineral density	Other	1e-06	1.2	% [NR] of variance explained	rs17131547-A	chr1	91983608	A/G	0	0.01	0.02069	0	Yes	-
	301	18455228	Richards JB	Lancet	Bone mineral density	Other	6e-12	0.13	[NR] SD decrease	rs3736228-T	chr11	67957871	C/T	0.14	0.14	0.08681	0.097	Yes	-
	302	21533022	Duncan EL	PLoS Genet	Bone mineral density	Other	5e-10	0.06	[NR] unit decrease	rs6710518-T	chr2	166291490	C/T	0.5	NA	0.4965	0.256	Yes	-
	303	21533022	Duncan EL	PLoS Genet	Bone mineral density	Other	1e-06	0.14	[NR] unit decrease	rs7524102-G	chr1	22571034	A/G	0.186	NA	0.1434	0.188	Yes	-
	304	21533022	Duncan EL	PLoS Genet	Bone mineral density	Other	9e-07	0.44	[NR] unit decrease	rs7524102-G	chr1	22571034	A/G	0.186	NA	0.1434	0.188	Yes	-
	305	19874204	Guo Y	J Bone Miner Res	Bone mineral density	Other	2e-06	0.11	[NR] s.d. increase	rs8057551-G	chr16	27342428	A/G	0.347	0.32	0.3	0	Yes	-
	306	21533022	Duncan EL	PLoS Genet	Bone mineral density	Other	4e-06	0.05	[NR] unit increase	rs9466056-G	chr6	21492592	A/G	0.59	NA	0.6215	0.557	Yes	-
	307	21533022	Duncan EL	PLoS Genet	Bone mineral density	Other	4e-06	0.15	[NR] unit increase	rs9594738-T	chr13	41850145	C/T	0.447	NA	0.354	0.295	Yes	-
	308	19874204	Guo Y	J Bone Miner Res	Bone mineral density	Other	4e-07	0.11	[NR] s.d. increase	rs9630182-T	chr11	13576748	C/T	0.385	0.38	0.5138	0.375	Yes	-
	309	19801982	Rivadeneira F	Nat Genet	Bone mineral density (hip)	Other	2e-07	0.09	[0.06-0.12] s.d. decrease	rs10048146-G	chr16	85268161	A/G	0.19	0.19	0.1276	0.114	Yes	-
	310	19079262	Styrkarsdottir U	Nat Genet	Bone mineral density (hip)	Other	7e-07	0.08	[0.05-0.11] s.d. decrease	rs1007738-A	chr11	46805936	A/G	0.814	0.77	0.6379	0.744	Yes	-
	311	19079262	Styrkarsdottir U	Nat Genet	Bone mineral density (hip)	Other	4e-10	0.08	[0.06-0.11] s.d. decrease	rs1038304-G	chr6	151974868	A/G	0.451	0.47	0.4655	0.466	Yes	-
	312	18445777	Styrkarsdottir U	N Engl J Med	Bone mineral density (hip)	Other	5e-09	0.08	[0.06-0.11] s.d. decrease	rs1038304-G	chr6	151974868	A/G	0.451	0.47	0.4655	0.466	Yes	-
	313	19801982	Rivadeneira F	Nat Genet	Bone mineral density (hip)	Other	8e-07	0.06	[0.04-0.08] s.d. increase	rs1471403-T	chr4	88994267	C/T	0.385	0.34	0.4161	0.29	Yes	-
	314	19801982	Rivadeneira F	Nat Genet	Bone mineral density (hip)	Other	2e-12	0.1	[0.07-0.13] s.d. increase	rs2566755-C	chr1	68407978	C/T	0.181	0.21	0.2172	0.284	Yes	-
	315	19801982	Rivadeneira F	Nat Genet	Bone mineral density (hip)	Other	6e-10	0.09	[0.06-0.12] s.d. increase	rs7117858-G	chr11	15651038	A/G	0.217	0.2	0.1806	0.218	Yes	-
	316	19079262	Styrkarsdottir U	Nat Genet	Bone mineral density (hip)	Other	1e-16	0.15	[0.11-0.18] s.d. decrease	rs7524102-A	chr1	22571034	A/G	0.814	0.82	0.8566	0.812	Yes	-
	317	18445777	Styrkarsdottir U	N Engl J Med	Bone mineral density (hip)	Other	5e-16	0.15	[0.11-0.19] s.d. decrease	rs7524102-A	chr1	22571034	A/G	0.814	0.82	0.8566	0.812	Yes	-
	318	19801982	Rivadeneira F	Nat Genet	Bone mineral density (hip)	Other	8e-10	0.07	[0.05-0.09] s.d. decrease	rs87938-A	chr3	41112676	A/G	0.438	0.45	0.4823	0.659	Yes	-
	319	18445777	Styrkarsdottir U	N Engl J Med	Bone mineral density (hip)	Other	2e-08	0.1	[0.06-0.13] s.d. decrease	rs9594738-T	chr13	41850145	C/T	0.447	0.56	0.354	0.295	Yes	-
	320	19801982	Rivadeneira F	Nat Genet	Bone mineral density (spine)	Other	2e-08	0.09	[0.06-0.12] s.d. decrease	rs10048146-G	chr16	85268161	A/G	0.19	0.19	0.1276	0.114	Yes	-
	321	18445777	Styrkarsdottir U	N Engl J Med	Bone mineral density (spine)	Other	4e-11	0.1	[0.07-0.13] s.d. decrease	rs1038304-G	chr6	151974868	A/G	0.451	0.47	0.4655	0.466	Yes	-
	322	19801982	Rivadeneira F	Nat Genet	Bone mineral density (spine)	Other	2e-08	0.07	[0.05-0.09] s.d. increase	rs1471403-T	chr4	88994267	C/T	0.385	0.34	0.4161	0.29	Yes	-
	323	19801982	Rivadeneira F	Nat Genet	Bone mineral density (spine)	Other	1e-08	0.07	[0.05-0.09] s.d. increase	rs2016266-G	chr12	52014222	A/G	0.332	0.32	0.2607	0.182	Yes	-
	324	19801982	Rivadeneira F	Nat Genet	Bone mineral density (spine)	Other	3e-10	0.09	[0.06-0.12] s.d. increase	rs7524102-G	chr1	22571034	A/G	0.186	0.17	0.1434	0.188	Yes	-
	325	18445777	Styrkarsdottir U	N Engl J Med	Bone mineral density (spine)	Other	9e-09	0.11	[0.07-0.15] s.d. decrease	rs7524102-A	chr1	22571034	A/G	0.814	0.82	0.8566	0.812	Yes	-
	326	21424380	Sehrawat B	Hum Genet	Breast cancer	Other	7e-06	1.42	[1.22-1.65]	rs10411161-T	chr19	57064788	C/T	0.138	0.13	0.2862	0.369	Yes	-
	327	21908515	Cai Q	Hum Mol Genet	Breast cancer	Other	6e-09	1.12	[1.06-1.18]	rs10822013-T	chr10	63921983	C/T	0.562	0.47	0.309	0.409	Yes	-
	328	20872241	Li J	Breast Cancer Res Treat	Breast cancer	Other	2e-13	1.32	[1.22-1.42]	rs1219648-G	chr10	123336180	A/G	0.465	0.42	0.4393	0.409	Yes	-
	329	17529973	Hunter DJ	Nat Genet	Breast cancer	Other	1e-10	1.2	[1.07-1.42]	rs1219648-G	chr10	123336180	A/G	0.465	0.4	0.4393	0.409	Yes	-
	330	21263130	Fletcher O	J Natl Cancer Inst	Breast cancer	Other	3e-11	1.16	[1.11-1.22]	rs1562430-A	chr8	128457034	C/T	0.647	0.6	0.7014	0.761	Yes	-
	331	20453838	Turnbull C	Nat Genet	Breast cancer	Other	6e-07	1.17	[1.10-1.25]	rs1562430-T	chr8	128457034	C/T	0.647	0.58	0.7014	0.761	Yes	-
	332	19219042	Zheng W	Nat Genet	Breast cancer	Other	2e-15	1.29	[1.21-1.37]	rs2046210-A	chr6	151990059	A/G	0.288	0.37	0.3785	0.318	Yes	-
	333	21908515	Cai Q	Hum Mol Genet	Breast cancer	Other	6e-06	1.11	[1.05-1.17]	rs2048672-C	chr7	130304391	A/C	0.681	0.45	0.7118	0.511	Yes	-
	334	18326623	Gold B	Proc Natl Acad Sci U S A	Breast cancer	Other	3e-08	1.41	[1.25-1.59]	rs2180341-G	chr6	127642323	A/G	0.257	0.21	0.4375	0.398	Yes	-
	335	20453838	Turnbull C	Nat Genet	Breast cancer	Other	5e-07	1.06	[1.02-1.10]	rs2380205-C	chr10	5926740	C/T	0.518	0.57	0.5208	0.77	Yes	-
	336	17529967	Easton DF	Nature	Breast cancer	Other	2e-76	1.26	[1.23-1.30]	rs2981582-A	chr10	123342307	A/G	0.456	0.38	0.4615	0.381	Yes	-
	337	20872241	Li J	Breast Cancer Res Treat	Breast cancer	Other	4e-07	1.22	[1.13-1.32]	rs3803662-A	chr16	51143842	A/G	0.248	0.3	0.2872	0.267	Yes	-
	338	20453838	Turnbull C	Nat Genet	Breast cancer	Other	3e-15	1.3	[1.22-1.39]	rs3803662-A	chr16	51143842	A/G	0.248	0.26	0.2872	0.267	Yes	-
	339	19330030	Thomas G	Nat Genet	Breast cancer	Other	1e-09	1.16	[1.07-1.27]	rs3803662-T	chr16	51143842	A/G	0.248	0.27	0.2872	0.267	Yes	-
	340	17529967	Easton DF	Nature	Breast cancer	Other	1e-36	1.2	[1.16-1.24]	rs3803662-T	chr16	51143842	A/G	0.248	0.25	0.2872	0.267	Yes	-
	341	17529974	Stacey SN	Nat Genet	Breast cancer	Other	6e-19	1.28	[1.21-1.35]	rs3803662-T	chr16	51143842	A/G	0.248	0.27	0.2872	0.267	Yes	-
	342	17529967	Easton DF	Nature	Breast cancer	Other	3e-09	1.07	[1.04-1.11]	rs3817198-C	chr11	1865582	C/T	0.327	0.3	0.3542	0.347	Yes	-
	343	20453838	Turnbull C	Nat Genet	Breast cancer	Other	3e-15	1.15	[1.10-1.20]	rs614367-T	chr11	69037945	C/T	0.185	0.15	0.1783	0.184	Yes	-
	344	20453838	Turnbull C	Nat Genet	Breast cancer	Other	4e-09	1.07	[1.03-1.11]	rs704010-A	chr10	80511154	C/T	0.433	0.39	0.2951	0.25	Yes	-
	345	22232737	Shu XO	Cancer Res	Breast cancer (survival)	Other	3e-07	1.43	[1.25-1.64]	rs3784099-A	chr14	67819680	A/G	0.305	NA	0.2587	0.233	Yes	-
	346	22232737	Shu XO	Cancer Res	Breast cancer (survival)	Other	1e-07	1.49	[1.28-1.72]	rs3784099-A	chr14	67819680	A/G	0.305	NA	0.2587	0.233	Yes	-
	347	22232737	Shu XO	Cancer Res	Breast cancer (survival)	Other	6e-06	1.29	[1.16-1.44]	rs9934948-C	chr16	71996856	C/T	0.871	NA	0.6439	0.534	Yes	-
	348	20212171	Buil A	Blood	C4b binding protein levels	Other	4e-10	NR	NR	rs3813948-C	chr1	205336481	C/T	0.107	NA	0.09091	0.119	Yes	-
	349	21490707	Cornelis MC	PLoS Genet	Caffeine consumption	Other	7e-06	0.15	[0.08-0.22] mg/day increase	rs7447447-T	chr5	104895835	C/T	0.159	0.13	0.1379	0.244	Yes	-
	350	21490707	Cornelis MC	PLoS Genet	Caffeine consumption	Other	5e-06	0.07	[0.04-0.10] mg/day increase	rs8014204-A	chr14	74392547	A/G	0.456	0.53	0.6319	0.722	Yes	-
	351	19584346	Vasan RS	JAMA	Cardiac structure and function	Other	9e-07	0.06	[0.04-0.08] cm increase	rs17132261-T	chr5	110036113	C/T	0.018	0.02	0.01034	0	Yes	-
	352	19584346	Vasan RS	JAMA	Cardiac structure and function	Other	7e-07	0.17	[0.11-0.23] cm increase	rs7910620-G	chr10	87836939	C/G	0.009	0.01	0	0.119	Yes	-
	353	20838585	Smith EN	PLoS Genet	Cardiovascular disease risk factors	Hypertriglyceridemia	8e-06	0.69	[0.40-0.98] % SD increase, SNPxAGE interaction	rs12280753-T	chr11	116118870	C/T	0.049	0.07	0.08681	0.029	No	LD to rs964184
	354	21943158	Middelberg RP	BMC Med Genet	Cardiovascular disease risk factors	Other	9e-71	0.31	[0.27-0.34] umol/l decrease	rs7671266-T	chr4	9665474	C/T	0.234	0.21	0.2326	0.148	Yes	-
	355	19185284	Ferrucci L	Am J Hum Genet	Carotenoid and tocopherol levels	Other	2e-24	0.15	[0.120-0.177] umol/L increase	rs6564851-G	chr16	79822098	G/T	0.563	0.39	0.3986	0.443	Yes	-
	356	20009918	Shrestha S	AIDS	Carotid atherosclerosis in HIV infection	Other	2e-06	NR	NR	rs13053817-A	chr22	28177722	A/C	0.19	0.18	0.1	0.057	Yes	-
	357	20009918	Shrestha S	AIDS	Carotid atherosclerosis in HIV infection	Other	1e-06	NR	NR	rs17151904-A	chr7	25574934	A/G	0.176	0.2	0.2022	0.326	Yes	-
	358	20009918	Shrestha S	AIDS	Carotid atherosclerosis in HIV infection	Other	9e-07	NR	NR	rs17691394-G	chr7	126111827	A/G	0.204	0.2	0.09655	0.08	Yes	-
	359	21909108	Bis JC	Nat Genet	Carotid intima media thickness	Other	2e-11	0.01	[0.01-0.01] unit decrease	rs11781551-A	chr8	123477272	A/G	0.403	0.48	0.3865	0.347	Yes	-
	360	21909108	Bis JC	Nat Genet	Carotid intima media thickness	Other	4e-07	0.3	[0.18-0.42] unit decrease	rs17045031-A	chr3	66851054	A/G	0.035	NA	0.0669	0.006	Yes	-
	361	21909108	Bis JC	Nat Genet	Carotid intima media thickness	Other	2e-12	0.16	[0.11-0.21] unit increase	rs17398575-A	chr7	106196688	A/G	0.277	0.25	0.2993	0.264	Yes	-
	362	21909108	Bis JC	Nat Genet	Carotid intima media thickness	Other	3e-06	0.01	[0.01-0.01] per unit increase	rs17398575-A	chr7	106196688	A/G	0.277	0.25	0.2993	0.264	Yes	-
	363	21909108	Bis JC	Nat Genet	Carotid intima media thickness	Other	8e-08	0.01	[0.01-0.01] unit increase	rs4712972-A	chr6	25880026	A/G	0.128	NA	0.1828	0.028	Yes	-
	364	20190752	Dubois PC	Nat Genet	Celiac disease	Other	5e-16	1.21	[1.16-1.27]	rs11221332-A	chr11	127886184	C/T	0.212	0.24	0.2708	0.227	Yes	-
	365	20190752	Dubois PC	Nat Genet	Celiac disease	Other	1e-50	6.23	[5.95-6.52]	rs2187668-A	chr6	32713862	C/T	0.08	0.26	0.1458	0.102	Yes	-
	366	17558408	van Heel DA	Nat Genet	Celiac disease	Other	1e-19	7.04	[6.08-8.15]	rs2187668-A	chr6	32713862	C/T	0.08	0.14	0.1458	0.102	Yes	-
	367	20190752	Dubois PC	Nat Genet	Celiac disease	Other	4e-19	1.23	[1.17-1.28]	rs2327832-G	chr6	138014761	A/G	0.155	0.22	0.06643	0.091	Yes	-
	368	20190752	Dubois PC	Nat Genet	Celiac disease	Other	7e-07	1.13	[1.08-1.18]	rs2762051-A	chr13	49733716	C/T	0.158	0.18	0.08621	0.091	Yes	-
	369	20190752	Dubois PC	Nat Genet	Celiac disease	Other	6e-09	1.14	[1.09-1.19]	rs4675374-A	chr2	204510823	C/T	0.186	0.22	0.2378	0.182	Yes	-
	370	20190752	Dubois PC	Nat Genet	Celiac disease	Other	7e-21	1.2	[1.15-1.24]	rs653178-G	chr12	110492139	C/T	0.438	0.5	0.3964	0.131	Yes	-
	371	18311140	Hunt KA	Nat Genet	Celiac disease	Other	8e-08	1.21	[1.13-1.30]	rs653178-G	chr12	110492139	C/T	0.438	0.48	0.3964	0.131	Yes	-
	372	21383967	Zhernakova A	PLoS Genet	Celiac disease and Rheumatoid arthritis	Other	1e-08	NR	NR	rs11203203-A	chr21	42709255	A/G	0.323	NA	0.369	0.341	Yes	-
	373	21383967	Zhernakova A	PLoS Genet	Celiac disease and Rheumatoid arthritis	Other	3e-19	NR	NR	rs653178-C	chr12	110492139	C/T	0.438	NA	0.3964	0.131	Yes	-
	374	20719862	Vitart V	Hum Mol Genet	Central corneal thickness	Other	1e-08	0.17	[0.11-0.23] unit increase	rs2755237-A	chr13	40007429	A/C	0.863	NA	0.8403	0.903	Yes	-
	375	20719862	Vitart V	Hum Mol Genet	Central corneal thickness	Other	1e-08	0.13	[0.09-0.18] unit increase	rs6496932-C	chr15	83626571	A/C	0.805	0.22	0.7734	0.574	Yes	-
	376	20686565	Teslovich TM	Nature	Cholesterol, total	Other	3e-08	1.06	[0.63-1.49] mg/dL decrease	rs10128711-T	chr11	18589560	C/T	0.284	0.29	0.3786	0.483	Yes	-
	377	20686565	Teslovich TM	Nature	Cholesterol, total	Other	3e-38	4.74	[3.92-5.56] mg/dL decrease	rs10401969-C	chr19	19268718	C/T	0.097	0.07	0.1517	0.114	Yes	-
	378	19060911	Aulchenko YS	Nat Genet	Cholesterol, total	Other	4e-12	0.08	[NR] s.d. decrease	rs10889353-C	chr1	62890784	A/C	0.336	0.32	0.2641	0.392	Yes	-
	379	19060911	Aulchenko YS	Nat Genet	Cholesterol, total	Other	5e-10	0.06	[NR] s.d. increase	rs10903129-G	chr1	25641524	A/G	0.544	0.54	0.3415	0.398	Yes	-
	380	20686565	Teslovich TM	Nature	Cholesterol, total	Other	1e-16	2.18	[1.65-2.71] mg/dL increase	rs1564348-C	chr6	160498850	C/T	0.17	0.17	0.06597	0.091	Yes	-
	381	19060911	Aulchenko YS	Nat Genet	Cholesterol, total	Other	2e-10	0.09	[NR] s.d. increase	rs174570-G	chr11	61353788	C/T	0.866	0.83	0.8993	0.972	Yes	-
	382	20686565	Teslovich TM	Nature	Cholesterol, total	Other	6e-13	4.73	[3.44-6.02] mg/dL decrease	rs1800961-T	chr20	42475778	C/T	0.036	0.03	0.02857	0.023	Yes	-
	383	20686565	Teslovich TM	Nature	Cholesterol, total	Other	4e-24	1.96	[1.49-2.43] mg/dL increase	rs2479409-G	chr1	55277238	A/G	0.35	0.3	0.3403	0.295	Yes	-
	384	20686565	Teslovich TM	Nature	Cholesterol, total	Other	5e-13	1.38	[0.95-1.81] mg/dL decrease	rs2642442-T	chr1	219040186	C/T	0.705	0.32	0.7847	0.699	Yes	-
	385	19060911	Aulchenko YS	Nat Genet	Cholesterol, total	Other	3e-19	0.09	[NR] s.d. increase	rs3846662-G	chr5	74686840	A/G	0.425	0.44	0.4577	0.653	Yes	-
	386	20686565	Teslovich TM	Nature	Cholesterol, total	Other	5e-111	6.83	[6.2-7.46] mg/dL increase	rs4420638-G	chr19	50114786	A/G	0.183	0.17	0.2345	0.057	Yes	-
	387	19060911	Aulchenko YS	Nat Genet	Cholesterol, total	Other	2e-11	0.07	[NR] s.d. increase	rs4939883-G	chr18	45421212	C/T	0.81	0.83	0.91319	0.892	Yes	-
	388	20686565	Teslovich TM	Nature	Cholesterol, total	Other	6e-131	5.41	[4.94-5.88] mg/dL decrease	rs629301-G	chr1	109619829	G/T	0.261	0.22	0.1655	0.25	Yes	-
	389	19060911	Aulchenko YS	Nat Genet	Cholesterol, total	Other	9e-23	0.1	[NR] s.d. decrease	rs693-G	chr2	21085700	A/G	0.509	0.52	0.5638	0.767	Yes	-
	390	20686565	Teslovich TM	Nature	Cholesterol, total	Other	1e-08	1.01	[0.62-1.4] mg/dL increase	rs7206971-A	chr17	42780114	A/G	0.475	0.49	0.4722	0	Yes	-
	391	20686565	Teslovich TM	Nature	Cholesterol, total	Other	3e-08	1.18	[0.71-1.65] mg/dL decrease	rs7515577-C	chr1	92782026	A/C	0.164	0.21	0.09655	0.057	Yes	-
	392	20686565	Teslovich TM	Nature	Cholesterol, total	Other	6e-57	4.68	[4.11-5.25] mg/dL increase	rs964184-G	chr11	116154127	C/G	0.121	0.13	0.1771	0.176	Yes	-
	393	21725309	Miki D	Nat Genet	Chronic Hepatitis C infection	Other	1e-13	1.75	[1.51-2.03]	rs1012068-G	chr22	30595903	G/T	0.261	0.12	0.3483	0.358	Yes	-
	394	20060832	Rauch A	Gastroenterology	Chronic Hepatitis C infection	Other	6e-09	2.31	[1.74-3.06]	rs8099917-G	chr19	44435005	G/T	0.15	0.24	0.3403	0.182	Yes	-
	395	20383146	Kottgen A	Nat Genet	Chronic kidney disease	Other	1e-08	0.01	[0.010-0.018] ml/min/1.73 m2 decrease	rs10794720-T	chr10	1146165	C/T	0.071	0.08	0.04514	0.051	Yes	-
	396	20383146	Kottgen A	Nat Genet	Chronic kidney disease	Other	1e-19	NR	NR	rs17319721-A	chr4	77587871	A/G	0.42	0.43	0.3169	0.126	Yes	-
	397	20383146	Kottgen A	Nat Genet	Chronic kidney disease	Other	1e-12	0.01	[0.004-0.016] ml/min/1.73m2 increase	rs267734-C	chr1	149218101	C/T	0.208	0.2	0.1448	0.045	Yes	-
	398	20383146	Kottgen A	Nat Genet	Chronic kidney disease	Other	3e-11	1.09	[0.007-0.011] ml/min/1.73 m2 increase	rs347685-C	chr3	143289827	A/C	0.265	0.28	0.1276	0.142	Yes	-
	399	20383146	Kottgen A	Nat Genet	Chronic kidney disease	Other	1e-07	0.01	[0.006-0.010] ml/min/1.73 m2 decrease	rs4014195-G	chr11	65263398	C/G	0.327	0.35	0.4137	0.341	Yes	-
	400	20383146	Kottgen A	Nat Genet	Chronic kidney disease	Other	4e-11	0.01	[0.009-0.017] ml/min/1.73 m2 increase	rs653178-T	chr12	110492139	C/T	0.562	0.5	0.6036	0.869	Yes	-
	401	20383146	Kottgen A	Nat Genet	Chronic kidney disease	Other	1e-15	0.01	[0.007-0.015] ml/min/1.73 m2 decrease	rs9895661-C	chr17	56811371	C/T	0.186	0.19	0.3958	0.443	Yes	-
	402	20686651	Gudbjartsson DF	PLoS Genet	Chronic kidney disease and serum creatinine levels	Other	4e-10	1.25	[1.17-1.35]	rs4293393-T	chr16	20272089	A/G	0.823	0.798	0.8849	0.724	Yes	-
	403	18758461	Di Bernardo MC	Nat Genet	Chronic lymphocytic leukemia	Other	6e-10	1.41	[1.26-1.57]	rs13397985-G	chr2	230799467	G/T	0.205	0.19	0.2063	0.224	Yes	-
	404	18758461	Di Bernardo MC	Nat Genet	Chronic lymphocytic leukemia	Other	2e-10	1.39	[1.25-1.53]	rs17483466-G	chr2	111513929	A/G	0.193	0.2	0.15	0.182	Yes	-
	405	21131588	Slager SL	Blood	Chronic lymphocytic leukemia	Other	7e-09	1.69	[1.41-2.01]	rs674313-T	chr6	32686060	C/T	0.138	0.26	0.2537	0.206	Yes	-
	406	20062064	Crowther-Swanepoel D	Nat Genet	Chronic lymphocytic leukemia	Other	5e-07	1.36	[1.21-1.53]	rs7169431-A	chr15	54128188	A/G	0.102	NA	0.1449	0.102	Yes	-
	407	18758461	Di Bernardo MC	Nat Genet	Chronic lymphocytic leukemia	Other	4e-12	1.45	[1.31-1.61]	rs735665-A	chr11	122866607	A/G	0.173	0.21	0.1403	0.114	Yes	-
	408	20062064	Crowther-Swanepoel D	Nat Genet	Chronic lymphocytic leukemia	Other	2e-09	1.38	[1.25-1.56]	rs757978-A	chr2	242019774	C/T	0.133	NA	0.07692	0.091	Yes	-
	409	20062064	Crowther-Swanepoel D	Nat Genet	Chronic lymphocytic leukemia	Other	4e-06	1.18	[1.10-1.27]	rs783540-G	chr15	81051763	A/G	0.397	NA	0.5851	0.477	Yes	-
	410	21131588	Slager SL	Blood	Chronic lymphocytic leukemia	Other	9e-08	1.61	[1.35-1.92]	rs9272535-A	chr6	32714734	A/G	0.161	0.27	0.25	0.169	Yes	-
	411	21131588	Slager SL	Blood	Chronic lymphocytic leukemia	Other	2e-06	1.38	[1.20-1.58]	rs9378805-C	chr6	362727	A/C	0.469	0.49	0.4062	0.432	Yes	-
	412	21540461	Kim DH	Blood	Chronic myeloid leukemia	Other	1e-12	1.85	[1.56-2.17]	rs4795519-C	chr17	22565405	A/C	0.323	0.48	0.3276	0.358	Yes	-
	413	21540461	Kim DH	Blood	Chronic myeloid leukemia	Other	2e-06	1.67	[1.35-2.04]	rs4869742-T	chr6	151949441	C/T	0.336	0.77	0.4466	0.432	Yes	-
	414	20231535	Smith NL	Circulation	Coagulation factor levels	Other	6e-37	NR	NR	rs867186-G	chr20	33228215	A/G	0.097	0.101	0.1793	0.148	Yes	-
	415	21357676	Sulem P	Hum Mol Genet	Coffee consumption	Other	5e-14	0.31	[0.17-0.44] increase in cups per day	rs2472297-T	chr15	72814933	C/T	0.248	0.265	0.08276	0.028	Yes	-
	416	17618283	Zanke BW	Nat Genet	Colorectal cancer	Other	3e-11	1.17	[1.12-1.23]	rs10505477-A	chr8	128476625	A/G	0.46	0.5	0.4483	0.489	Yes	-
	417	18372905	Tomlinson IP	Nat Genet	Colorectal cancer	Other	3e-18	1.27	[1.20-1.34]	rs16892766-A	chr8	117699864	A/C	0.894	0.07	0.93403	0.977	Yes	-
	418	21242260	Cui R	Gut	Colorectal cancer	Other	2e-08	1.18	[1.11-1.25]	rs6983267-G	chr8	128482487	G/T	0.487	0.34	0.5288	0.506	Yes	-
	419	17618284	Tomlinson I	Nat Genet	Colorectal cancer	Other	1e-14	1.27	[1.16-1.39]	rs6983267-G	chr8	128482487	G/T	0.487	0.49	0.5288	0.506	Yes	-
	420	18372901	Tenesa A	Nat Genet	Colorectal cancer	Other	9e-26	1.19	[1.15-1.23]	rs7014346-A	chr8	128493974	A/G	0.31	0.18	0.3345	0.364	Yes	-
	421	20585627	Eriksson N	PLoS Genet	Common traits (Other)	Other	1e-10	0.13	[NR] unit increase	rs499697-G	chr1	150759778	A/G	0.288	0.29	0.2465	0.233	Yes	-
	422	18846501	Sonuga-Barke EJ	Am J Med Genet B Neuropsychiatr Genet	Conduct disorder (interaction)	Other	9e-06	1.3	[NR] unit increase	rs17116334-T	chr11	113466972	C/T	0.128	0.16	0.1775	0.131	Yes	-
	423	18846501	Sonuga-Barke EJ	Am J Med Genet B Neuropsychiatr Genet	Conduct disorder (interaction)	Other	7e-06	1.39	[NR] unit increase	rs17664267-T	chr18	39062796	G/T	0.205	0.19	0.1213	0.108	Yes	-
	424	18846501	Sonuga-Barke EJ	Am J Med Genet B Neuropsychiatr Genet	Conduct disorder (interaction)	Other	7e-06	2.88	[NR] unit increase	rs2282301-A	chr1	154135249	A/G	0.257	0.23	0.1759	0.227	Yes	-
	425	18846501	Sonuga-Barke EJ	Am J Med Genet B Neuropsychiatr Genet	Conduct disorder (interaction)	Other	7e-06	1.13	[NR] unit increase	rs4321143-G	chr15	93957372	A/G	0.263	0.28	0.2034	0.256	Yes	-
	426	18846501	Sonuga-Barke EJ	Am J Med Genet B Neuropsychiatr Genet	Conduct disorder (interaction)	Other	5e-06	2.05	[NR] unit decrease	rs719593-T	chr2	41858501	A/G	0.867	0.86	0.8493	0.722	Yes	-
	427	18846501	Sonuga-Barke EJ	Am J Med Genet B Neuropsychiatr Genet	Conduct disorder (interaction)	Other	8e-06	1.76	[NR] unit decrease	rs8073783-C	chr17	48592940	C/T	0.442	0.49	0.3881	0.574	Yes	-
	428	18846501	Sonuga-Barke EJ	Am J Med Genet B Neuropsychiatr Genet	Conduct disorder (interaction)	Other	7e-06	1.15	[NR] unit decrease	rs893971-T	chr4	89422694	A/G	0.549	0.6	0.6364	0.733	Yes	-
	429	22144915	Fan Q	PLoS Genet	Corneal astigmatism	Other	5e-06	1.29	[1.17-1.41]	rs2270676-G	chr11	73846059	A/G	0.093	NA	0.03448	0.205	Yes	-
	430	22144915	Fan Q	PLoS Genet	Corneal astigmatism	Other	3e-06	1.39	[1.21-1.57]	rs6758183-A	chr2	226709230	A/G	0.305	NA	0.1172	0.21	Yes	-
	431	22144915	Fan Q	PLoS Genet	Corneal astigmatism	Other	5e-06	1.24	[1.14-1.34]	rs6792584-G	chr3	67614078	A/G	0.296	NA	0.2917	0.188	Yes	-
	432	22144915	Fan Q	PLoS Genet	Corneal astigmatism	Other	8e-09	1.26	[1.18-1.34]	rs7677751-T	chr4	54819217	C/T	0.164	0.22	0.1241	0.25	Yes	-
	433	22144573	O'Donnell CJ	Circulation	Coronary artery calcification	Coronary Artery Disease	3e-24	0.2	[0.16-0.24] % increase	rs1333049-C	chr9	22115503	C/G	0.456	NA	0.5379	0.483	No	Duplicated
	434	21347282	Lettre G	PLoS Genet	Coronary heart disease	Other	4e-06	0.22	[0.13-0.31] SD decrease	rs1028771-A	chr1	181437571	A/C	1	0.97	0.996479	0	Yes	-
	435	21347282	Lettre G	PLoS Genet	Coronary heart disease	Other	3e-06	0.07	[0.04-0.10] SD decrease	rs10895547-T	chr11	103313362	C/T	0.381	0.23	0.2021	0.46	Yes	-
	436	21378990	Schunkert H	Nat Genet	Coronary heart disease	Coronary Artery Disease	9e-08	1.08	[1.05-1.11]	rs11206510-T	chr1	55268627	C/T	0.836	0.82	0.90345	0.955	Yes	-
	437	21378990	Schunkert H	Nat Genet	Coronary heart disease	Coronary Artery Disease	1e-09	1.14	[1.09-1.18]	rs1122608-G	chr19	11024601	G/T	0.743	0.77	0.6806	0.761	Yes	-
	438	21378990	Schunkert H	Nat Genet	Coronary heart disease	Coronary Artery Disease	9e-18	1.09	[1.07-1.12]	rs11556924-C	chr7	129450732	C/T	0.615	0.62	0.7199	0.864	Yes	-
	439	21347282	Lettre G	PLoS Genet	Coronary heart disease	Other	1e-08	0.17	[0.11-0.23] SD decrease	rs11669133-A	chr19	10953139	A/G	0.053	0.06	0.01049	0.006	Yes	-
	440	21347282	Lettre G	PLoS Genet	Coronary heart disease	Other	9e-07	0.11	[0.07-0.15] SD increase	rs11671653-A	chr19	10699486	A/G	0.106	0.11	0.05517	0.085	Yes	-
	441	21347282	Lettre G	PLoS Genet	Coronary heart disease	Other	6e-06	0.09	[0.05-0.13] SD decrease	rs11684202-A	chr2	25741062	A/G	0.637	0.86	0.7183	0.722	Yes	-
	442	21378990	Schunkert H	Nat Genet	Coronary heart disease	Coronary Artery Disease	1e-12	1.08	[1.06-1.10]	rs12190287-C	chr6	134256218	C/G	0.597	0.62	0.5828	0.46	Yes	-
	443	21347282	Lettre G	PLoS Genet	Coronary heart disease	Other	5e-06	0.09	[0.05-0.13] SD increase	rs12239436-A	chr1	55515425	A/G	0	0.14	0	0	Yes	-
	444	21347282	Lettre G	PLoS Genet	Coronary heart disease	Other	2e-06	0.07	[0.04-0.10] SD increase	rs12269901-C	chr11	116479139	C/G	0.254	0.68	0.2923	0.477	Yes	-
	445	21378990	Schunkert H	Nat Genet	Coronary heart disease	Coronary Artery Disease	1e-09	1.12	[1.08-1.16]	rs12413409-G	chr10	104709086	A/G	0.925	0.89	0.75	0.722	Yes	-
	446	21378990	Schunkert H	Nat Genet	Coronary heart disease	Coronary Artery Disease	1e-09	1.1	[1.06-1.13]	rs12526453-C	chr6	13035530	C/G	0.633	0.67	0.631	0.858	Yes	-
	447	21347282	Lettre G	PLoS Genet	Coronary heart disease	Other	2e-07	0.09	[0.06-0.12] SD decrease	rs1263173-A	chr11	116186218	A/G	0.777	0.21	0.6806	0.426	Yes	-
	448	21347282	Lettre G	PLoS Genet	Coronary heart disease	Other	4e-07	0.18	[0.11-0.25] SD increase	rs13015955-A	chr2	22675664	A/G	0.248	0.05	0.169	0.142	Yes	-
	449	21378988	C4DGC	Nat Genet	Coronary heart disease	Coronary Artery Disease	6e-08	1.11	[1.07-1.15]	rs1332844-T	chr6	12996990	C/T	0.615	NA	0.5903	0.75	No	LD to rs12526453
	450	21606135	Wild PS	Circ Cardiovasc Genet	Coronary heart disease	Coronary Artery Disease	7e-58	1.27	[1.23-1.31]	rs1333049-C	chr9	22115503	C/G	0.456	0.49	0.5379	0.483	No	LD to rs7865618
	451	17634449	Samani NJ	N Engl J Med	Coronary heart disease	Coronary Artery Disease	3e-19	1.36	[1.27-1.46]	rs1333049-C	chr9	22115503	C/G	0.456	0.47	0.5379	0.483	No	Duplicated
	452	17554300	WTCCC	Nature	Coronary heart disease	Coronary Artery Disease	1e-13	1.47	[1.27-1.70]	rs1333049-C	chr9	22115503	C/G	0.456	0.47	0.5379	0.483	No	Duplicated
	453	21347282	Lettre G	PLoS Genet	Coronary heart disease	Other	9e-06	0.14	[0.08-0.20] SD increase	rs1445021-A	chr15	66522640	A/G	1	0.94	1	0	Yes	-
	454	21606135	Wild PS	Circ Cardiovasc Genet	Coronary heart disease	Coronary Artery Disease	5e-06	1.13	[1.07-1.21]	rs16893526-G	chr6	82572034	A/G	0.885	0.91	0.91379	0.892	Yes	-
	455	21347282	Lettre G	PLoS Genet	Coronary heart disease	Other	6e-07	0.14	[0.09-0.19] SD decrease	rs16965039-T	chr16	55604800	C/T	0.956	0.94	0.96897	0.898	Yes	-
	456	21347282	Lettre G	PLoS Genet	Coronary heart disease	Other	5e-06	0.07	[0.04-0.10] SD decrease	rs16971384-A	chr16	71488586	A/G	0.743	0.55	0.5828	0.619	Yes	-
	457	17634449	Samani NJ	N Engl J Med	Coronary heart disease	Coronary Artery Disease	2e-07	1.21	[1.13-1.30]	rs17228212-C	chr15	65245693	C/T	0.339	0.3	0.1345	0.102	Yes	-
	458	21378990	Schunkert H	Nat Genet	Coronary heart disease	Coronary Artery Disease	3e-10	1.09	[1.07-1.13]	rs1746048-C	chr10	44095830	C/T	0.854	0.87	0.8077	0.699	Yes	-
	459	21378990	Schunkert H	Nat Genet	Coronary heart disease	Coronary Artery Disease	1e-08	1.14	[1.09-1.20]	rs17465637-C	chr1	220890152	A/C	0.732	0.74	0.7103	0.665	Yes	-
	460	17634449	Samani NJ	N Engl J Med	Coronary heart disease	Coronary Artery Disease	1e-06	1.2	[1.12-1.30]	rs17465637-C	chr1	220890152	A/C	0.732	0.71	0.7103	0.665	No	Duplicated
	461	21378990	Schunkert H	Nat Genet	Coronary heart disease	Coronary Artery Disease	1e-08	1.07	[1.05-1.10]	rs17609940-G	chr6	35142778	C/G	0.779	0.75	0.95833	0.915	Yes	-
	462	17554300	WTCCC	Nature	Coronary heart disease	Coronary Artery Disease	2e-06	1.43	[1.23-1.64]	rs17672135-T	chr1	238512219	C/T	0.862	0.87	0.7878	0.835	Yes	-
	463	21239051	Reilly MP	Lancet	Coronary heart disease	Coronary Artery Disease	5e-13	1.19	[1.13-1.24]	rs1994016-C	chr15	76867289	C/T	0.571	0.6	0.631	0.672	Yes	-
	464	19198612	Erdmann J	Nat Genet	Coronary heart disease	Coronary Artery Disease	5e-07	1.08	[1.05-1.11]	rs2259816-T	chr12	119919970	G/T	0.381	0.36	0.4098	0.455	Yes	-
	465	21378990	Schunkert H	Nat Genet	Coronary heart disease	Coronary Artery Disease	3e-08	1.12	[1.07-1.16]	rs2306374-C	chr3	139602642	C/T	0.177	0.18	0.09155	0.074	No	LD to rs9818870
	466	21347282	Lettre G	PLoS Genet	Coronary heart disease	Other	2e-06	0.07	[0.04-0.10] SD increase	rs2346177-A	chr2	46495753	A/G	0.456	0.49	0.4754	0.46	Yes	-
	467	21378988	C4DGC	Nat Genet	Coronary heart disease	Coronary Artery Disease	4e-08	1.07	[1.04-1.09]	rs2505083-C	chr10	30375128	C/T	0.429	0.38	0.4479	0.284	Yes	-
	468	17634449	Samani NJ	N Engl J Med	Coronary heart disease	Coronary Artery Disease	2e-07	1.21	[1.13-1.30]	rs2943634-C	chr2	226776324	A/C	0.655	0.65	0.684	0.801	Yes	-
	469	21606135	Wild PS	Circ Cardiovasc Genet	Coronary heart disease	Coronary Artery Disease	8e-07	1.11	[1.06-1.15]	rs365302-C	chr6	159566321	C/T	0.208	0.24	0.2517	0.403	Yes	-
	470	21347282	Lettre G	PLoS Genet	Coronary heart disease	Other	2e-11	0.09	[0.06-0.12] SD increase	rs3729639-T	chr16	65783002	C/T	0.066	0.44	0.08148	0.148	Yes	-
	471	21088011	Erdmann J	Eur Heart J	Coronary heart disease	Coronary Artery Disease	1e-11	1.15	[1.11-1.20]	rs3739998-C	chr10	30356078	C/G	0.562	NA	0.5759	0.67	Yes	-
	472	21378990	Schunkert H	Nat Genet	Coronary heart disease	Coronary Artery Disease	2e-08	1.06	[1.04-1.08]	rs46522-T	chr17	44343596	C/T	0.536	0.53	0.5552	0.534	Yes	-
	473	21378990	Schunkert H	Nat Genet	Coronary heart disease	Coronary Artery Disease	4e-09	1.07	[1.05-1.09]	rs4773144-G	chr13	109758713	A/G	0.42	0.44	0.5106	0.46	Yes	-
	474	21347282	Lettre G	PLoS Genet	Coronary heart disease	Other	5e-06	0.08	[0.05-0.11] SD increase	rs4804155-C	chr19	11195295	C/G	0.916	0.69	0.93056	0.852	Yes	-
	475	21378990	Schunkert H	Nat Genet	Coronary heart disease	Coronary Artery Disease	5e-06	1.06	[1.04-1.09]	rs4937126-G	chr11	125787107	A/G	0.661	0.69	0.8014	0.756	Yes	-
	476	21378990	Schunkert H	Nat Genet	Coronary heart disease	Coronary Artery Disease	1e-22	1.29	[1.23-1.36]	rs4977574-G	chr9	22088574	A/G	0.46	0.46	0.5655	0.477	No	Duplicated
	477	21378988	C4DGC	Nat Genet	Coronary heart disease	Coronary Artery Disease	2e-25	1.2	[1.16-1.25]	rs4977574-G	chr9	22088574	A/G	0.46	NA	0.5655	0.477	No	LD to rs7865618
	478	21378990	Schunkert H	Nat Genet	Coronary heart disease	Coronary Artery Disease	3e-10	1.11	[1.08-1.15]	rs599839-A	chr1	109623689	A/G	0.721	0.78	0.8427	0.75	Yes	-
	479	17634449	Samani NJ	N Engl J Med	Coronary heart disease	Coronary Artery Disease	4e-09	1.29	[1.18-1.40]	rs599839-A	chr1	109623689	A/G	0.721	0.77	0.8427	0.75	No	Duplicated
	480	21378990	Schunkert H	Nat Genet	Coronary heart disease	Coronary Artery Disease	1e-09	1.14	[1.09-1.19]	rs6725887-C	chr2	203454130	C/T	0.159	0.15	0.05594	0.011	Yes	-
	481	17554300	WTCCC	Nature	Coronary heart disease	Coronary Artery Disease	4e-06	1.11	[0.99-1.25]	rs688034-T	chr22	25019635	C/T	0.332	0.31	0.2958	0.074	Yes	-
	482	17634449	Samani NJ	N Engl J Med	Coronary heart disease	Coronary Artery Disease	3e-08	1.23	[1.15-1.33]	rs6922269-A	chr6	151294678	A/G	0.261	0.25	0.3472	0.256	Yes	-
	483	21347282	Lettre G	PLoS Genet	Coronary heart disease	Other	3e-06	0.08	[0.05-0.11] SD increase	rs7203193-A	chr16	11548681	A/G	0.535	0.22	0.6538	0.545	Yes	-
	484	21347282	Lettre G	PLoS Genet	Coronary heart disease	Other	1e-07	0.14	[0.09-0.19] SD decrease	rs7323893-T	chr13	87502707	C/T	1	0.91	1	0	Yes	-
	485	21347282	Lettre G	PLoS Genet	Coronary heart disease	Other	5e-06	0.07	[0.04-0.10] SD decrease	rs744487-A	chr1	232792635	A/C	0.723	0.72	0.625	0.767	Yes	-
	486	21347282	Lettre G	PLoS Genet	Coronary heart disease	Other	1e-07	0.1	[0.06-0.14] SD decrease	rs7569328-T	chr2	20964259	C/T	0.013	0.15	0.003448	0.023	Yes	-
	487	21378990	Schunkert H	Nat Genet	Coronary heart disease	Coronary Artery Disease	2e-06	1.06	[1.04-1.09]	rs7651039-C	chr3	15623008	C/T	0.469	0.46	0.5352	0.477	Yes	-
	488	21378990	Schunkert H	Nat Genet	Coronary heart disease	Coronary Artery Disease	1e-06	1.1	[1.06-1.14]	rs7808424-G	chr7	116855058	G/T	0.113	0.12	0.1632	0	Yes	-
	489	21606135	Wild PS	Circ Cardiovasc Genet	Coronary heart disease	Coronary Artery Disease	2e-27	1.18	[1.14-1.21]	rs7865618-A	chr9	22021005	A/G	0.553	0.59	0.6875	0.676	Yes	-
	490	17554300	WTCCC	Nature	Coronary heart disease	Coronary Artery Disease	6e-06	1.91	[1.33-2.74]	rs8055236-G	chr16	81769899	G/T	0.805	0.8	0.8681	0.795	Yes	-
	491	21347282	Lettre G	PLoS Genet	Coronary heart disease	Other	1e-06	0.08	[0.05-0.11] SD increase	rs937254-A	chr15	55697456	A/G	0.376	0.57	0.472	0.483	Yes	-
	492	21347282	Lettre G	PLoS Genet	Coronary heart disease	Coronary Artery Disease	2e-06	1.66	[1.35-2.04]	rs9546711-A	chr13	83952267	A/G	0.2	NonEuro	0.1357	0.222	Yes	-
	493	21378990	Schunkert H	Nat Genet	Coronary heart disease	Coronary Artery Disease	1e-17	1.13	[1.10-1.16]	rs964184-G	chr11	116154127	C/G	0.121	0.13	0.1771	0.176	Yes	-
	494	19198612	Erdmann J	Nat Genet	Coronary heart disease	Coronary Artery Disease	7e-13	1.15	[1.11-1.19]	rs9818870-T	chr3	139604812	C/T	0.168	0.15	0.09028	0.074	Yes	-
	495	18439548	Ridker PM	Am J Hum Genet	C-reactive protein	Other	1e-10	0.12	[NR] mg/dl decrease	rs10778213-G	chr12	102019281	C/T	0.513	NA	0.5142	0.449	Yes	-
	496	21300955	Dehghan A	Circulation	C-reactive protein	Other	1e-15	0.05	[0.04-0.06] unit increase	rs12239046-C	chr1	245668218	C/T	0.619	NA	0.4722	0.631	Yes	-
	497	21647738	Wu Y	Inflammation	C-reactive protein	Other	1e-06	0.41	[0.24-0.58] unit increase	rs1408282-A	chr6	93908973	A/G	0.094	0.1	0.25	0.312	Yes	-
	498	21300955	Dehghan A	Circulation	C-reactive protein	Other	2e-09	0.09	[0.06-0.12] unit increase	rs1800961-C	chr20	42475778	C/T	0.964	NA	0.97143	0.977	Yes	-
	499	18439548	Ridker PM	Am J Hum Genet	C-reactive protein	Other	7e-21	0.17	[NR] mg/dl decrease	rs1892534-A	chr1	65878532	C/T	0.338	NA	0.4345	0.466	Yes	-
	500	21300955	Dehghan A	Circulation	C-reactive protein	Other	2e-186	0.16	[0.15-0.17] unit increase	rs2794520-C	chr1	157945440	C/T	0.659	NA	0.7447	0.614	Yes	-
	501	21300955	Dehghan A	Circulation	C-reactive protein	Other	4e-09	0.03	[0.02-0.04] unit increase	rs340029-T	chr15	58682257	C/T	0.625	NA	0.6042	0.636	Yes	-
	502	21300955	Dehghan A	Circulation	C-reactive protein	Other	2e-48	0.08	[0.07-0.09] unit increase	rs4129267-C	chr1	152692888	C/T	0.65	NA	0.4716	0.722	Yes	-
	503	21300955	Dehghan A	Circulation	C-reactive protein	Other	9e-139	0.24	[0.22-0.26] unit increase	rs4420638-A	chr19	50114786	A/G	0.817	NA	0.7655	0.943	Yes	-
	504	21196492	Okada Y	Hum Mol Genet	C-reactive protein	Other	3e-07	0.14	[0.09-0.19] unit increase	rs4420638-A	chr19	50114786	A/G	0.817	0.9	0.7655	0.943	Yes	-
	505	19567438	Elliott P	JAMA	C-reactive protein	Other	5e-27	21.8	[18.1-25.3] % decrease	rs4420638-G	chr19	50114786	A/G	0.183	NA	0.2345	0.057	Yes	-
	506	19567438	Elliott P	JAMA	C-reactive protein	Other	2e-14	11.5	[8.5-14.4] % decrease	rs4537545-T	chr1	152685503	C/T	0.368	NA	0.5382	0.279	Yes	-
	507	21300955	Dehghan A	Circulation	C-reactive protein	Other	1e-08	0.04	[0.03-0.05] unit increase	rs4705952-G	chr5	131867517	A/G	0.217	NA	0.4375	0.392	Yes	-
	508	21300955	Dehghan A	Circulation	C-reactive protein	Other	2e-17	0.05	[0.04-0.06] unit increase	rs6734238-G	chr2	113557501	A/G	0.394	NA	0.493	0.29	Yes	-
	509	21300955	Dehghan A	Circulation	C-reactive protein	Other	5e-08	0.04	[0.03-0.05] unit increase	rs6901250-A	chr6	117220718	A/G	0.327	NA	0.3794	0.224	Yes	-
	510	21647738	Wu Y	Inflammation	C-reactive protein	Other	1e-08	0.27	[0.18-0.36] unit increase	rs7305618-T	chr12	119887315	C/T	0.204	0.52	0.2882	0.261	Yes	-
	511	19567438	Elliott P	JAMA	C-reactive protein	Other	8e-44	20.7	[18.9-23.4] % decrease	rs7553007-A	chr1	157965173	A/G	0.336	NA	0.2028	0.381	Yes	-
	512	18439548	Ridker PM	Am J Hum Genet	C-reactive protein	Other	7e-15	0.14	[NR] mg/dl increase	rs780094-A	chr2	27594741	C/T	0.394	NA	0.4893	0.188	Yes	-
	513	19081515	Mead S	Lancet Neurol	Creutzfeldt-Jakob disease	Other	6e-08	NR	NR	rs1460163-A	chr8	80390003	A/G	0.086	NA	0.1944	0.205	Yes	-
	514	17554300	WTCCC	Nature	Crohn's disease	Other	3e-07	1.54	[1.31-1.82]	rs1000113-T	chr5	150220269	C/T	0.044	0.07	0.1276	0.062	Yes	-
	515	21102463	Franke A	Nat Genet	Crohn's disease	Other	7e-09	1.14	[1.09-1.19]	rs10181042-T	chr2	61077763	C/T	0.412	0.42	0.269	0.21	Yes	-
	516	17554300	WTCCC	Nature	Crohn's disease	Other	5e-14	1.19	[1.01-1.41]	rs10210302-T	chr2	233823578	C/T	0.58	0.48	0.6042	0.489	Yes	-
	517	21102463	Franke A	Nat Genet	Crohn's disease	Other	2e-14	1.14	[1.09-1.20]	rs10495903-T	chr2	43660422	C/T	0.146	0.129	0.1759	0.199	Yes	-
	518	21102463	Franke A	Nat Genet	Crohn's disease	Other	4e-22	1.23	[1.18-1.29]	rs10761659-G	chr10	64115570	A/G	0.553	0.538	0.5552	0.619	Yes	-
	519	17554300	WTCCC	Nature	Crohn's disease	Other	2e-06	1.23	[1.05-1.45]	rs10761659-G	chr10	64115570	A/G	0.553	0.46	0.5552	0.619	Yes	-
	520	17554300	WTCCC	Nature	Crohn's disease	Other	6e-08	1.2	[1.03-1.39]	rs10883365-G	chr10	101277754	A/G	0.456	0.48	0.3582	0.375	Yes	-
	521	18587394	Barrett JC	Nat Genet	Crohn's disease	Other	3e-10	1.54	[NR]	rs11175593-T	chr12	38888207	C/T	0.027	0.02	0.07586	0.085	Yes	-
	522	21102463	Franke A	Nat Genet	Crohn's disease	Other	1e-64	2.66	[2.36-3.00]	rs11209026-G	chr1	67478546	A/G	0.959	0.932	0.94964	0	Yes	-
	523	21102463	Franke A	Nat Genet	Crohn's disease	Other	6e-21	1.74	[1.55-1.95]	rs11564258-A	chr12	39078567	A/G	0.027	0.025	0.1204	0.102	Yes	-
	524	18587394	Barrett JC	Nat Genet	Crohn's disease	Other	1e-11	1.18	[NR]	rs11584383-T	chr1	199202489	C/T	0.668	0.7	0.7931	0.903	Yes	-
	525	21102463	Franke A	Nat Genet	Crohn's disease	Other	7e-36	1.33	[1.27-1.39]	rs11742570-C	chr5	40446341	C/T	0.646	0.606	0.5	0.448	Yes	-
	526	18587394	Barrett JC	Nat Genet	Crohn's disease	Other	3e-16	1.33	[NR]	rs11747270-G	chr5	150239060	A/G	0.049	0.09	0.1364	0.153	Yes	-
	527	17554300	WTCCC	Nature	Crohn's disease	Other	6e-12	1.39	[1.22-1.58]	rs11805303-T	chr1	67448104	C/T	0.292	0.32	0.4138	0.563	Yes	-
	528	21102463	Franke A	Nat Genet	Crohn's disease	Other	1e-20	1.23	[1.18-1.28]	rs12521868-T	chr5	131812292	G/T	0.397	0.422	0.2897	0.102	Yes	-
	529	21102463	Franke A	Nat Genet	Crohn's disease	Other	3e-09	1.11	[1.05-1.16]	rs12722489-C	chr10	6142018	C/T	0.827	0.852	0.8379	0.892	Yes	-
	530	21102463	Franke A	Nat Genet	Crohn's disease	Other	9e-10	1.06	[1.03-1.10]	rs13428812-G	chr2	25345971	A/G	0.314	0.326	0.469	0.256	Yes	-
	531	18587394	Barrett JC	Nat Genet	Crohn's disease	Other	5e-09	1.2	[NR]	rs1456893-A	chr7	50240218	A/G	0.65	0.68	0.6903	0.898	Yes	-
	532	21102463	Franke A	Nat Genet	Crohn's disease	Other	2e-11	1.07	[1.03-1.12]	rs151181-G	chr16	28398018	C/T	0.372	0.386	0.2345	0.307	Yes	-
	533	17554300	WTCCC	Nature	Crohn's disease	Other	4e-11	1.29	[1.13-1.46]	rs17221417-G	chr16	49297083	C/G	0.35	0.29	0.1875	0.097	Yes	-
	534	17554300	WTCCC	Nature	Crohn's disease	Other	2e-12	1.54	[1.34-1.76]	rs17234657-G	chr5	40437266	G/T	0.168	0.13	0.05208	0.017	Yes	-
	535	21102463	Franke A	Nat Genet	Crohn's disease	Other	7e-09	1.1	[1.05-1.16]	rs17309827-T	chr6	3378317	G/T	0.646	0.639	0.566	0.886	Yes	-
	536	21102463	Franke A	Nat Genet	Crohn's disease	Other	5e-16	1.1	[1.06-1.15]	rs181359-T	chr22	20258641	A/G	0.168	0.203	0.2394	0.375	Yes	-
	537	21102463	Franke A	Nat Genet	Crohn's disease	Other	9e-17	1.19	[1.13-1.25]	rs1819658-C	chr10	59583157	C/T	0.796	0.774	0.7931	0.739	Yes	-
	538	21102463	Franke A	Nat Genet	Crohn's disease	Other	5e-09	1.07	[1.03-1.11]	rs1847472-G	chr6	91029880	A/C	0.692	0.658	0.7674	0.761	Yes	-
	539	21102463	Franke A	Nat Genet	Crohn's disease	Other	1e-26	1.23	[1.17-1.29]	rs2413583-C	chr22	37989719	C/T	0.854	0.83	0.7241	0.784	Yes	-
	540	18587394	Barrett JC	Nat Genet	Crohn's disease	Other	5e-17	1.35	[NR]	rs2542151-G	chr18	12769947	G/T	0.115	0.15	0.1424	0.102	Yes	-
	541	17554300	WTCCC	Nature	Crohn's disease	Other	2e-07	1.3	[1.14-1.48]	rs2542151-G	chr18	12769947	G/T	0.115	0.16	0.1424	0.102	Yes	-
	542	21102463	Franke A	Nat Genet	Crohn's disease	Other	1e-10	1.05	[1.02-1.09]	rs2549794-C	chr5	96270305	C/T	0.429	0.409	0.3552	0.284	Yes	-
	543	21102463	Franke A	Nat Genet	Crohn's disease	Other	7e-12	1.07	[1.04-1.11]	rs281379-A	chr19	53906086	A/G	0.559	0.487	0.3741	0.222	Yes	-
	544	18587394	Barrett JC	Nat Genet	Crohn's disease	Other	5e-09	1.12	[NR]	rs2872507-A	chr17	35294289	A/G	0.473	0.47	0.4655	0.33	Yes	-
	545	21102463	Franke A	Nat Genet	Crohn's disease	Other	2e-14	1.12	[1.07-1.17]	rs3024505-T	chr1	205006527	A/G	0.181	0.157	0.2188	0.19	Yes	-
	546	18587394	Barrett JC	Nat Genet	Crohn's disease	Other	2e-13	1.25	[NR]	rs3764147-G	chr13	43355925	A/G	0.243	0.22	0.2793	0.369	Yes	-
	547	21102463	Franke A	Nat Genet	Crohn's disease	Other	1e-15	1.21	[1.15-1.27]	rs3810936-C	chr9	116592706	C/T	0.642	0.682	0.7464	0.727	Yes	-
	548	18587394	Barrett JC	Nat Genet	Crohn's disease	Other	2e-32	1.25	[NR]	rs3828309-G	chr2	233845149	A/G	0.571	0.53	0.6034	0.494	Yes	-
	549	18587394	Barrett JC	Nat Genet	Crohn's disease	Other	3e-10	1.22	[NR]	rs4263839-G	chr9	116606261	A/G	0.637	0.68	0.7759	0.761	Yes	-
	550	17554300	WTCCC	Nature	Crohn's disease	Other	3e-06	1.55	[1.00-2.39]	rs6596075-C	chr5	131770127	C/G	0.819	0.17	0.8083	0.824	Yes	-
	551	17554300	WTCCC	Nature	Crohn's disease	Other	9e-06	1.16	[1.01-1.33]	rs6601764-C	chr10	3852542	C/T	0.46	0.41	0.5106	0.665	Yes	-
	552	18587394	Barrett JC	Nat Genet	Crohn's disease	Other	9e-10	1.21	[NR]	rs6908425-C	chr6	20836710	C/T	0.823	0.78	0.8106	0.718	Yes	-
	553	21102463	Franke A	Nat Genet	Crohn's disease	Other	7e-12	1.08	[1.04-1.13]	rs713875-C	chr22	28922487	C/G	0.385	0.471	0.6	0.636	Yes	-
	554	21102463	Franke A	Nat Genet	Crohn's disease	Other	3e-13	1.12	[1.07-1.18]	rs7423615-T	chr2	230825118	C/T	0.205	0.187	0.1979	0.233	Yes	-
	555	18587394	Barrett JC	Nat Genet	Crohn's disease	Other	7e-12	1.18	[NR]	rs744166-A	chr17	37767727	A/G	0.549	0.57	0.5979	0.5	Yes	-
	556	18587394	Barrett JC	Nat Genet	Crohn's disease	Other	1e-09	1.13	[NR]	rs762421-G	chr21	44439989	A/G	0.412	0.39	0.2847	0.381	Yes	-
	557	17554300	WTCCC	Nature	Crohn's disease	Other	4e-06	1.38	[1.20-1.60]	rs7807268-G	chr7	147888981	C/G	0.451	0.46	0.4643	0.562	Yes	-
	558	18587394	Barrett JC	Nat Genet	Crohn's disease	Other	1e-09	1.16	[NR]	rs7927894-T	chr11	75978964	C/T	0.394	0.39	0.4586	0.256	Yes	-
	559	21102463	Franke A	Nat Genet	Crohn's disease	Other	4e-18	1.23	[1.16-1.31]	rs8005161-T	chr14	87542348	C/T	0.14	0.119	0.1448	0.261	Yes	-
	560	17554300	WTCCC	Nature	Crohn's disease	Other	2e-06	1.14	[0.98-1.32]	rs9469220-A	chr6	32766288	A/G	0.442	0.48	0.4393	0.625	Yes	-
	561	17554300	WTCCC	Nature	Crohn's disease	Other	4e-08	1.09	[0.96-1.24]	rs9858542-A	chr3	49676987	A/G	0.257	0.28	0.3542	0.227	Yes	-
	562	18723019	Franke A	Gastroenterology	Crohn's disease and sarcoidosis (combined)	Other	4e-06	1.23	[1.04-1.45]	rs1398024-A	chr10	23705444	G/T	0.235	0.25	0.1783	0.199	Yes	-
	563	19578365	Falchi M	Nat Genet	Cutaneous nevi	Other	3e-08	0.08	[-0.002-0.16] decrease in log nevus count	rs2284063-G	chr22	36874244	A/G	0.319	0.35	0.4069	0.5	Yes	-
	564	19578365	Falchi M	Nat Genet	Cutaneous nevi	Other	3e-15	0.2	[0.13-0.27] increase in log nevus count	rs4636294-A	chr9	21737803	A/G	0.504	0.48	0.5483	0.631	Yes	-
	565	21993531	Kuparinen T	Genes Immun	Cytomegalovirus antibody response	Other	8e-06	0.3	[0.17-0.43] unit increase	rs17077154-G	chr8	6338660	C/T	0.035	0.07	0.02069	0.131	Yes	-
	566	21993531	Kuparinen T	Genes Immun	Cytomegalovirus antibody response	Other	8e-07	0.33	[0.20-0.45] unit decrease	rs17170316-A	chr7	33639790	G/T	0.022	0.07	0.1179	0.114	Yes	-
	567	21993531	Kuparinen T	Genes Immun	Cytomegalovirus antibody response	Other	9e-06	0.32	[0.18-0.47] unit increase	rs2086512-A	chr6	99118222	A/G	0.102	0.06	0.06993	0.227	Yes	-
	568	21993531	Kuparinen T	Genes Immun	Cytomegalovirus antibody response	Other	3e-06	0.26	[0.15-0.36] unit decrease	rs2870137-A	chr20	38118955	C/T	0.128	0.12	0.191	0.193	Yes	-
	569	21993531	Kuparinen T	Genes Immun	Cytomegalovirus antibody response	Other	5e-06	0.21	[0.12-0.30] unit decrease	rs2885805-A	chr1	111219438	A/C	0.257	0.28	0.3448	0.46	Yes	-
	570	21502573	Smith NL	Circulation	D-dimer levels	Other	2e-14	10.1	[2.7-17.9] % increase	rs6687813-A	chr1	167744198	A/C	0.068	0.06	0.1503	0.08	Yes	-
	571	21502573	Smith NL	Circulation	D-dimer levels	Other	4e-06	0.05	[NR] % increase	rs867186-G	chr20	33228215	A/G	0.097	0.091	0.1793	0.148	Yes	-
	572	20800221	Terracciano A	Biol Psychiatry	Depression--quantitative trait	Other	5e-06	0.15	[NR] unit increase	rs10514585-A	chr16	81841839	A/G	0.23	0.31	0.4706	0.233	Yes	-
	573	22233651	Kwak SH	Diabetes	Diabetes (gestational)	Type 2 Diabetes	2e-13	1.45	[1.315-1.608]	rs10830962-G	chr11	92338075	C/G	0.389	NonEuro	0.4266	0.46	Yes	-
	574	22233651	Kwak SH	Diabetes	Diabetes (gestational)	Type 2 Diabetes	2e-07	1.33	[1.197-1.484]	rs1470579-C	chr3	187011774	A/C	0.296	NonEuro	0.4113	0.511	No	Duplicated
	575	22233651	Kwak SH	Diabetes	Diabetes (gestational)	Type 2 Diabetes	7e-16	1.52	[1.372-1.680]	rs7754840-C	chr6	20769229	C/G	0.336	NonEuro	0.3172	0.216	Yes	-
	576	21150874	McDonough CW	Kidney Int	Diabetic nephropathy	Other	4e-06	1.75	[1.39-2.22]	rs2106294-T	chr22	29975759	C/T	0.695	0.94	0.7	0.744	Yes	-
	577	21150874	McDonough CW	Kidney Int	Diabetic nephropathy	Other	4e-06	1.33	[1.18-1.49]	rs2358944-G	chr12	64403825	A/G	0.137	0.77	0.2276	0.381	Yes	-
	578	21150874	McDonough CW	Kidney Int	Diabetic nephropathy	Other	7e-07	1.31	[1.18-1.45]	rs6930576-A	chr6	148746647	A/G	0.341	0.28	0.4132	0.432	Yes	-
	579	21150874	McDonough CW	Kidney Int	Diabetic nephropathy	Other	6e-06	1.32	[1.18-1.49]	rs773506-G	chr9	93015292	A/G	0.366	0.77	0.438	0.506	Yes	-
	580	21150874	McDonough CW	Kidney Int	Diabetic nephropathy	Other	2e-06	1.28	[1.16-1.42]	rs7769051-A	chr6	133188489	A/C	0.097	0.29	0.1875	0.155	Yes	-
	581	21441570	Grassi MA	Hum Mol Genet	Diabetic retinopathy	Other	7e-06	1.02	[NR]	rs11765845-A	chr7	28357667	A/G	0.284	0.29	0.1796	0.262	Yes	-
	582	21310492	Huang YC	Ophthalmology	Diabetic retinopathy	Other	3e-15	NR	NR	rs17376456-A	chr5	93583458	A/G	0.876	NA	0.8966	0.96	Yes	-
	583	21441570	Grassi MA	Hum Mol Genet	Diabetic retinopathy	Other	1e-06	1.16	[NR]	rs17404956-A	chr5	166322071	A/G	0.911	0.9	0.93103	0.977	Yes	-
	584	21310492	Huang YC	Ophthalmology	Diabetic retinopathy	Other	3e-07	NR	NR	rs2811893-T	chr1	58934736	C/T	0.584	NA	0.5559	0.614	Yes	-
	585	21441570	Grassi MA	Hum Mol Genet	Diabetic retinopathy	Other	5e-06	1.35	[NR]	rs3007729-T	chr1	18667842	C/T	0.664	0.65	0.7801	0.653	Yes	-
	586	21441570	Grassi MA	Hum Mol Genet	Diabetic retinopathy	Other	3e-06	1.35	[NR]	rs7772697-T	chr6	149476804	C/T	0.575	0.58	0.6154	0.58	Yes	-
	587	21441570	Grassi MA	Hum Mol Genet	Diabetic retinopathy	Other	9e-07	1.02	[NR]	rs9866141-T	chr3	158433273	C/T	0.022	0.04	0.07241	0.051	Yes	-
	588	19430479	Levy D	Nat Genet	Diastolic blood pressure	Other	1e-06	0.33	[0.19-0.47] mm Hg decrease	rs11024074-T	chr11	16873795	C/T	0.345	0.72	0.35	0.176	Yes	-
	589	21909115	Ehret GB	Nature	Diastolic blood pressure	Other	9e-12	0.26	[NR] mmHg increase	rs1173771-G	chr5	32850785	A/G	0.509	0.6	0.5786	0.625	Yes	-
	590	21909115	Ehret GB	Nature	Diastolic blood pressure	Other	1e-15	0.3	[NR] mmHg increase	rs1327235-G	chr20	10917030	A/G	0.522	0.46	0.4306	0.455	Yes	-
	591	21909115	Ehret GB	Nature	Diastolic blood pressure	Other	3e-26	0.42	[NR] mmHg increase	rs1378942-C	chr15	72864420	A/C	0.321	0.35	0.6076	0.869	Yes	-
	592	19430483	Newton-Cheh C	Nat Genet	Diastolic blood pressure	Other	1e-23	0.43	[0.35-0.51] mm Hg increase	rs1378942-C	chr15	72864420	A/C	0.321	0.36	0.6076	0.869	Yes	-
	593	19430483	Newton-Cheh C	Nat Genet	Diastolic blood pressure	Other	5e-09	0.31	[0.21-0.41] mm Hg increase	rs16948048-G	chr17	44795465	A/G	0.416	0.39	0.2587	0.159	Yes	-
	594	19430479	Levy D	Nat Genet	Diastolic blood pressure	Other	4e-08	0.35	[0.23-0.47] mm Hg decrease	rs2384550-A	chr12	113837114	A/G	0.633	0.35	0.6181	0.619	Yes	-
	595	19430483	Newton-Cheh C	Nat Genet	Diastolic blood pressure	Other	3e-18	0.46	[0.36-0.56] mm Hg decrease	rs653178-T	chr12	110492139	C/T	0.438	0.53	0.3964	0.131	Yes	-
	596	21909115	Ehret GB	Nature	Diastolic blood pressure	Other	6e-08	0.3	[NR] mmHg decrease	rs7129220-G	chr11	10307114	A/G	0.106	0.89	0.05986	0.04	Yes	-
	597	19389651	Smith JG	Heart Rhythm	Electrocardiographic conduction measures	Other	4e-06	5	[2.84-7.16] ms decrease	rs2070488-A	chr3	38417494	A/G	0.597	0.33	0.5724	0.597	Yes	-
	598	19389651	Smith JG	Heart Rhythm	Electrocardiographic conduction measures	Other	8e-06	4.54	[2.58-6.50] ms increase	rs2461751-G	chr2	175997565	A/G	0.854	0.44	0.7448	0.744	Yes	-
	599	19389651	Smith JG	Heart Rhythm	Electrocardiographic conduction measures	Other	2e-06	4.8	[2.84-6.76] ms increase	rs7638909-G	chr3	38569977	G/T	0.217	0.4	0.2103	0.227	Yes	-
	600	20062063	Holm H	Nat Genet	Electrocardiographic traits	Other	5e-11	11.95	[8.39-15.51] % s.d. increase	rs3807375-T	chr7	150298143	C/T	0.376	0.35	0.3846	0.381	Yes	-
	601	20062063	Holm H	Nat Genet	Electrocardiographic traits	Other	3e-13	7.35	[5.37-9.33] % s.d. increase	rs3825214-G	chr12	113279826	A/G	0.181	0.22	0.2621	0.233	Yes	-
	602	20062063	Holm H	Nat Genet	Electrocardiographic traits	Other	1e-07	5.88	[3.72-8.03] % s.d. increase	rs3825214-G	chr12	113279826	A/G	0.181	0.22	0.2621	0.233	Yes	-
	603	20062063	Holm H	Nat Genet	Electrocardiographic traits	Other	3e-12	7.36	[5.29-9.43] % s.d. increase	rs3825214-G	chr12	113279826	A/G	0.181	0.22	0.2621	0.233	Yes	-
	604	20709820	Kong X	Am J Respir Crit Care Med	Emphysema-related traits	Other	6e-06	1.47	[NR]	rs2999399-T	chr10	1620821	C/T	0.819	0.76	0.6704	0.591	Yes	-
	605	20709820	Kong X	Am J Respir Crit Care Med	Emphysema-related traits	Other	8e-07	1.85	[NR] HU increase	rs7905537-A	chr10	34271281	A/C	0.761	0.75	0.7737	0.818	Yes	-
	606	20601957	Uno S	Nat Genet	Endometriosis	Other	2e-06	1.2	[1.11-1.29]	rs16826658-G	chr1	22358458	G/T	0.407	0.523	0.2331	0.415	Yes	-
	607	20844546	Adachi S	J Hum Genet	Endometriosis	Other	3e-06	1.5	[1.27-1.78]	rs6542095-C	chr2	113245654	C/T	0.327	0.72	0.3611	0.312	Yes	-
	608	20844546	Adachi S	J Hum Genet	Endometriosis	Other	5e-06	1.65	[1.33-2.05]	rs801112-C	chr1	227063245	C/T	0.009	0.11	0	0	Yes	-
	609	19198610	Gudbjartsson DF	Nat Genet	Eosinophil counts	Other	5e-10	6.3	[4.3-8.3] % standard unit increase	rs12619285-G	chr2	213532290	A/G	0.243	0.74	0.2481	0.233	Yes	-
	610	19198610	Gudbjartsson DF	Nat Genet	Eosinophil counts	Other	1e-10	7.1	[4.9-9.2] % standard unit increase	rs4143832-C	chr5	131890876	G/T	0.832	0.16	0.6875	0.847	Yes	-
	611	20208534	Rothenberg ME	Nat Genet	Eosinophilic esophagitis (pediatric)	Other	2e-06	1.96	[1.40-2.74]	rs1032757-T	chr5	81975074	A/G	0.075	0.07	0.04138	0.068	Yes	-
	612	20208534	Rothenberg ME	Nat Genet	Eosinophilic esophagitis (pediatric)	Other	7e-06	1.53	[1.21-1.93]	rs11989782-A	chr8	121763831	A/C	0.214	0.23	0.1353	0.102	Yes	-
	613	20147318	Qi L	Hum Mol Genet	E-selectin levels	Other	2e-82	9.71	[NR] % variance explained	rs651007-T	chr9	135143696	C/T	0.204	0.22	0.273	0.125	Yes	-
	614	21642993	Wu C	Nat Genet	Esophageal cancer	Other	2e-19	1.49	[1.37-1.61]	rs10052657-C	chr5	58443528	A/C	0.858	0.78	0.90357	0	Yes	-
	615	21642993	Wu C	Nat Genet	Esophageal cancer	Other	5e-09	2.04	[1.61-2.56]	rs10058728-T	chr5	148884285	A/T	0.558	0.98	0.5786	0.722	Yes	-
	616	21642993	Wu C	Nat Genet	Esophageal cancer	Other	7e-21	1.38	[1.29-1.48]	rs11066015-A	chr12	110652392	A/G	0	0.19	0.01471	0.006	Yes	-
	617	21642993	Wu C	Nat Genet	Esophageal cancer	Other	2e-15	1.3	[1.22-1.38]	rs11066280-A	chr12	111302166	A/T	0	0.21	0	0	Yes	-
	618	21642993	Wu C	Nat Genet	Esophageal cancer	Other	2e-31	1.56	[1.45-1.68]	rs2074356-T	chr12	111129784	A/G	0	0.13	0	0	Yes	-
	619	21642993	Wu C	Nat Genet	Esophageal cancer	Other	4e-20	1.34	[1.26-1.42]	rs2274223-G	chr10	96056331	A/G	0.319	0.21	0.4167	0.267	Yes	-
	620	21642993	Wu C	Nat Genet	Esophageal cancer	Other	1e-11	1.56	[1.37-1.78]	rs8030672-A	chr15	66846138	A/T	0	0.03	0.01145	0.006	Yes	-
	621	21642993	Wu C	Nat Genet	Esophageal cancer	Other	1e-07	1.19	[1.11-1.27]	rs9868873-G	chr3	124213600	A/G	0.893	0.82	0.8248	0.851	Yes	-
	622	20729852	Abnet CC	Nat Genet	Esophageal cancer and gastric cancer	Other	4e-09	1.36	[1.23-1.50]	rs3781264-C	chr10	96060365	A/G	0.274	0.15	0.3655	0.216	Yes	-
	623	20729852	Abnet CC	Nat Genet	Esophageal cancer and gastric cancer	Other	1e-08	1.3	[1.19-1.43]	rs738722-T	chr22	27460012	C/T	0.323	0.25	0.1944	0.216	Yes	-
	624	21184583	Zlojutro M	Am J Med Genet B Neuropsychiatr Genet	Event-related brain oscillations	Other	9e-06	0.21	[0.12-0.30] uV increase	rs2294015-G	chr8	124766048	C/T	0.442	0.33	0.3381	0.17	Yes	-
	625	19727025	De Moor MH	Med Sci Sports Exerc	Exercise (leisure time)	Other	4e-06	1.32	[1.17-1.49]	rs10887741-T	chr10	89433290	C/T	0.553	NA	0.7276	0.705	Yes	-
	626	19727025	De Moor MH	Med Sci Sports Exerc	Exercise (leisure time)	Other	7e-06	1.36	[1.19-1.56]	rs8097348-G	chr18	1585021	A/G	0.17	NA	0.2425	0.125	Yes	-
	627	20585627	Eriksson N	PLoS Genet	Eye color	Other	3e-52	8.43	[NR]	rs12913832-A	chr15	26039213	A/G	0.208	0.23	0.723	0.909	Yes	-
	628	20585627	Eriksson N	PLoS Genet	Eye color	Other	1e-300	2.49	[NR] unit increase	rs12913832-A	chr15	26039213	A/G	0.208	0.23	0.723	0.909	Yes	-
	629	20585627	Eriksson N	PLoS Genet	Eye color	Other	3e-09	0.28	[NR] unit decrease	rs1393350-A	chr11	88650694	A/G	0.226	0.27	0.1581	0.114	Yes	-
	630	20081858	Dupuis J	Nat Genet	Fasting glucose-related traits	Insulin	3e-43	NR	NR	rs10830963-G	chr11	92348358	C/G	0.3	0.3	0.2445	0	No	Duplicated
	631	20081858	Dupuis J	Nat Genet	Fasting glucose-related traits	Insulin	7e-22	NR	NR	rs11708067-A	chr3	124548468	A/G	0.774	0.78	0.8586	0.784	Yes	-
	632	20081858	Dupuis J	Nat Genet	Fasting glucose-related traits	Insulin	3e-12	NR	NR	rs11708067-A	chr3	124548468	A/G	0.774	0.78	0.8586	0.784	No	Duplicated
	633	20081858	Dupuis J	Nat Genet	Fasting glucose-related traits	Insulin	1e-08	NR	NR	rs4506565-T	chr10	114746031	A/T	0.296	0.31	0.2276	0.305	No	LD to rs12243326
	634	20081858	Dupuis J	Nat Genet	Fasting glucose-related traits	Insulin	9e-218	NR	NR	rs560887-C	chr2	169471394	C/T	0.674	0.7	0.7765	0.835	Yes	-
	635	20081858	Dupuis J	Nat Genet	Fasting glucose-related traits	Insulin	2e-66	NR	NR	rs560887-C	chr2	169471394	C/T	0.674	0.7	0.7765	0.835	No	Duplicated
	636	20081858	Dupuis J	Nat Genet	Fasting glucose-related traits	Insulin	6e-38	NR	NR	rs780094-C	chr2	27594741	C/T	0.606	0.62	0.5107	0.812	Yes	-
	637	20081858	Dupuis J	Nat Genet	Fasting glucose-related traits	Insulin	3e-24	NR	NR	rs780094-C	chr2	27594741	C/T	0.606	0.62	0.5107	0.812	No	Duplicated
	638	20081858	Dupuis J	Nat Genet	Fasting glucose-related traits	Insulin	4e-20	NR	NR	rs780094-C	chr2	27594741	C/T	0.606	0.62	0.5107	0.812	No	Duplicated
	639	20081858	Dupuis J	Nat Genet	Fasting glucose-related traits	Insulin	2e-18	NR	NR	rs7944584-A	chr11	47292896	A/T	0.712	0.75	0.7821	0.784	Yes	-
	640	20081858	Dupuis J	Nat Genet	Fasting insulin-related traits	Insulin	3e-24	NR	NR	rs780094-C	chr2	27594741	C/T	0.606	0.62	0.5107	0.812	No	Duplicated
	641	20081858	Dupuis J	Nat Genet	Fasting insulin-related traits	Insulin	4e-20	NR	NR	rs780094-C	chr2	27594741	C/T	0.606	0.62	0.5107	0.812	No	Duplicated
	642	19060907	Prokopenko I	Nat Genet	Fasting plasma glucose	Insulin	3e-50	0.07	[0.06-0.08] mmol/l increase	rs10830963-G	chr11	92348358	C/G	0.3	0.28	0.2445	0	No	Duplicated
	643	19060907	Prokopenko I	Nat Genet	Fasting plasma glucose	Insulin	1e-57	0.06	[0.05-0.07] mmol/l increase	rs560887-C	chr2	169471394	C/T	0.674	0.7	0.7765	0.835	No	Duplicated
	644	18451265	Bouatia-Naji N	Science	Fasting plasma glucose	Insulin	4e-23	0.06	[0.05-0.08] mmol/l decrease	rs560887-A	chr2	169471394	C/T	0.326	0.3	0.2235	0.835	No	Duplicated
	645	18521185	Chen WM	J Clin Invest	Fasting plasma glucose	Insulin	4e-07	NR	NR	rs563694-C	chr2	169482317	A/C	0.372	0.34	0.3063	0.195	No	LD to rs560887
	646	21326311	Bhatnagar P	J Hum Genet	F-cell distribution	Other	8e-06	0.82	[0.47-1.17] unit decrease	rs2577720-C	chr2	23402119	A/C	0.54	0.33	0.6276	0.557	Yes	-
	647	21326311	Bhatnagar P	J Hum Genet	F-cell distribution	Other	6e-06	1.2	[0.69-1.71] unit increase	rs3800569-C	chr7	138061965	C/T	0.283	0.13	0.3007	0.182	Yes	-
	648	18245381	Uda M	Proc Natl Acad Sci U S A	Fetal hemoglobin levels	Other	7e-35	0.48	[NR] s.d. decrease in HbF	rs11886868-T	chr2	60573750	C/T	0.699	0.8	0.4618	0.443	Yes	-
	649	18245381	Uda M	Proc Natl Acad Sci U S A	Fetal hemoglobin levels	Other	1e-21	0.58	[NR] s.d. decrease in HbF	rs4910742-A	chr11	5263085	A/G	0.973	0.93	0.98601	0.909	Yes	-
	650	20031576	Dehghan A	Circ Cardiovasc Genet	Fibrinogen	Other	1e-08	0.04	[0.03-0.05] g/L decrease	rs1539019-A	chr1	245666924	A/C	0.363	0.37	0.5179	0.369	Yes	-
	651	20031576	Dehghan A	Circ Cardiovasc Genet	Fibrinogen	Other	1e-15	0.06	[0.04-0.08] g/L decrease	rs2522056-A	chr5	131829625	A/G	0.186	0.21	0.2943	0.408	Yes	-
	652	19303062	Tanaka T	Am J Hum Genet	Folate pathway vitamin levels	Other	7e-06	0.29	[0.13-0.45] ng/ml increase	rs153734-T	chr3	64053049	C/T	0.73	0.84	0.8472	0.807	Yes	-
	653	20639881	Conde L	Nat Genet	Follicular lymphoma	Other	4e-09	1.81	[1.50-2.20]	rs735665-T	chr11	122866607	A/G	0.173	0.21	0.1403	0.114	Yes	-
	654	17952075	Sulem P	Nat Genet	Freckles	Other	2e-11	1.32	[1.17-1.49]	rs1042602-C	chr11	88551344	A/C	0.571	0.67	0.6606	0.881	Yes	-
	655	17952075	Sulem P	Nat Genet	Freckles	Other	4e-18	1.4	[1.26-1.57]	rs1540771-A	chr6	411033	C/T	0.559	0.42	0.5208	0.33	Yes	-
	656	20585627	Eriksson N	PLoS Genet	Freckling	Other	5e-14	0.77	[NR] unit increase	rs619865-A	chr20	33331111	A/G	0.124	0.1	0.04167	0.068	Yes	-
	657	20825314	Baratz KH	N Engl J Med	Fuchs's corneal dystrophy	Other	1e-06	2.3	[1.64-3.22]	rs10490775-A	chr3	62011764	C/T	0.15	0.1	0.169	0.256	Yes	-
	658	21909109	Kim YJ	Nat Genet	Gamma glutamyl transpeptidase	Other	9e-58	0.01	[0.011-0.013] IU/L increase	rs12229654-G	chr12	109898844	G/T	0	0.14	0	0	Yes	-
	659	21909109	Kim YJ	Nat Genet	Gamma glutamyl transpeptidase	Other	6e-10	0.01	[0.0035-0.0067] IU/L increase	rs12539316-C	chr7	72615834	A/G	0.257	0.1	0.1099	0.182	Yes	-
	660	21909109	Kim YJ	Nat Genet	Gamma glutamyl transpeptidase	Other	3e-126	0.02	[0.015-0.017] IU/L increase	rs2074356-T	chr12	111129784	A/G	0	0.15	0	0	Yes	-
	661	21909109	Kim YJ	Nat Genet	Gamma glutamyl transpeptidase	Other	7e-30	0.01	[0.0062-0.0090] IU/L increase	rs2393791-G	chr12	119908339	C/T	0.425	0.48	0.4896	0.489	Yes	-
	662	21909109	Kim YJ	Nat Genet	Gamma glutamyl transpeptidase	Other	7e-53	0.01	[0.0076-0.0100] IU/L decrease	rs4820599-G	chr22	23320213	A/G	0.27	0.24	0.2604	0.199	Yes	-
	663	21909109	Kim YJ	Nat Genet	Gamma glutamyl transpeptidase	Other	1e-14	0	[0.0031-0.0055] IU/L decrease	rs4835265-T	chr4	147040860	A/C	0.138	0.42	0.1632	0.244	Yes	-
	664	20363506	Meguro A	Ophthalmology	Glaucoma	Other	3e-09	2.8	[1.96-3.99]	rs3213787-A	chr2	45500328	A/G	0.987	0.81	0.95517	0.915	Yes	-
	665	20363506	Meguro A	Ophthalmology	Glaucoma	Other	4e-06	1.69	[1.36-2.11]	rs735860-C	chr6	53231077	C/T	0.509	0.48	0.5944	0.557	Yes	-
	666	19578367	Shete S	Nat Genet	Glioma	Other	2e-17	1.27	[1.19-1.37]	rs2736100-G	chr5	1339516	A/C	0.527	0.49	0.5603	0.645	Yes	-
	667	19578367	Shete S	Nat Genet	Glioma	Other	1e-08	1.18	[1.13-1.24]	rs498872-T	chr11	117982577	A/G	0.31	0.69	0.2794	0.403	Yes	-
	668	20858683	Soranzo N	Diabetes	Glycated hemoglobin levels	Other	2e-26	0.04	[0.03-0.05] % increase	rs1046896-T	chr17	78278822	C/T	0.314	0.31	0.4241	0.438	Yes	-
	669	20858683	Soranzo N	Diabetes	Glycated hemoglobin levels	Other	1e-20	0.04	[0.03-0.05] % increase	rs1799884-T	chr7	44195593	C/T	0.195	0.18	0.2128	0.114	Yes	-
	670	20858683	Soranzo N	Diabetes	Glycated hemoglobin levels	Other	6e-12	0.03	[0.02-0.04] % increase	rs4737009-A	chr8	41749562	A/G	0.27	0.24	0.2	0.216	Yes	-
	671	20858683	Soranzo N	Diabetes	Glycated hemoglobin levels	Other	8e-18	0.05	[0.04-0.06] % increase	rs552976-G	chr2	169499684	A/G	0.624	0.64	0.6931	0.784	Yes	-
	672	20858683	Soranzo N	Diabetes	Glycated hemoglobin levels	Other	1e-08	0.06	[0.04-0.08] % increase	rs6474359-T	chr8	41668351	C/T	0.968	0.97	0.98276	0	Yes	-
	673	19096518	Pare G	PLoS Genet	Glycated hemoglobin levels	Other	2e-25	0.05	[NR] % increase	rs7072268-A	chr10	70769919	C/T	0.504	0.5	0.5915	0.529	Yes	-
	674	22290723	Ryu J	Hum Mutat	Glycated hemoglobin levels	Other	1e-11	0.05	[NR] % decrease	rs7747752-C	chr6	20833402	C/G	0.204	0.53	0.269	0.199	Yes	-
	675	21841780	Chu X	Nat Genet	Graves' disease	Other	7e-24	1.35	[1.28-1.43]	rs12101261-T	chr14	80520982	C/T	0.345	0.64	0.3201	0.29	Yes	-
	676	21900946	Nakabayashi K	J Hum Genet	Graves' disease	Other	1e-13	1.38	[1.27-1.50]	rs4248154-C	chr6	31110595	C/T	0.81	0.54	0.6049	0.807	Yes	-
	677	21841780	Chu X	Nat Genet	Graves' disease	Other	4e-51	1.77	[1.65-1.91]	rs4947296-C	chr6	31166157	C/T	0.062	0.14	0.2241	0.125	Yes	-
	678	21841780	Chu X	Nat Genet	Graves' disease	Other	7e-33	1.4	[1.32-1.48]	rs6457617-T	chr6	32771829	C/T	0.522	0.45	0.3655	0.432	Yes	-
	679	21841780	Chu X	Nat Genet	Graves' disease	Other	1e-13	1.24	[1.17-1.31]	rs6832151-G	chr4	39998408	G/T	0.274	0.35	0.3172	0.148	Yes	-
	680	20585627	Eriksson N	PLoS Genet	Hair color	Other	9e-88	0.97	[NR] unit increase	rs12913832-A	chr15	26039213	A/G	0.208	0.23	0.723	0.909	Yes	-
	681	19896111	Medland SE	Am J Hum Genet	Hair morphology	Other	9e-06	NR	NR	rs17605562-T	chr2	11954630	C/T	0.04	NA	0.07343	0.051	Yes	-
	682	19896111	Medland SE	Am J Hum Genet	Hair morphology	Other	1e-07	NR	NR	rs6732426-T	chr2	43441008	C/T	0.531	NA	0.4483	0.5	Yes	-
	683	19896111	Medland SE	Am J Hum Genet	Hair morphology	Other	4e-06	NR	NR	rs908922-A	chr1	150721215	A/G	0.696	NA	0.7447	0.767	Yes	-
	684	21051773	Scerri TS	Hum Mol Genet	Handedness in dyslexia	Other	2e-08	0.35	[0.23-0.47] SD increase	rs11855415-A	chr15	99692646	A/T	0.239	0.25	0.1528	0.409	Yes	-
	685	21909109	Kim YJ	Nat Genet	HDL cholesterol	Other	8e-43	0.04	[0.037-0.049] mg/dL increase	rs10503669-T	chr8	19891970	A/C	0.115	0.12	0.131	0.085	Yes	-
	686	18193043	Willer CJ	Nat Genet	HDL cholesterol	Other	4e-19	2.09	[NR] mg/dl higher	rs10503669-A	chr8	19891970	A/C	0.115	0.1	0.131	0.085	Yes	-
	687	20686565	Teslovich TM	Nature	HDL cholesterol	Other	3e-14	0.51	[0.35-0.67] mg/dL decrease	rs11869286-C	chr17	35067382	C/G	0.683	0.34	0.718	0.699	Yes	-
	688	20864672	Waterworth DM	Arterioscler Thromb Vasc Biol	HDL cholesterol	Other	4e-07	0.02	[0.01-0.03] unit decrease	rs11902417-G	chr2	21052397	A/G	0.788	0.78	0.6966	0.455	Yes	-
	689	21909109	Kim YJ	Nat Genet	HDL cholesterol	Other	3e-23	0.03	[0.023-0.033] mg/dL decrease	rs12229654-G	chr12	109898844	G/T	0	0.14	0	0	Yes	-
	690	21909109	Kim YJ	Nat Genet	HDL cholesterol	Other	2e-28	0.04	[0.033-0.047] mg/dL decrease	rs12708980-C	chr16	55569880	G/T	0.354	0.1	0.4034	0.42	Yes	-
	691	21909109	Kim YJ	Nat Genet	HDL cholesterol	Other	1e-24	0.02	[0.018-0.027] mg/dL increase	rs16940212-T	chr15	56481312	G/T	0.21	0.34	0.2379	0.159	Yes	-
	692	20686565	Teslovich TM	Nature	HDL cholesterol	Other	1e-09	0.57	[0.33-0.81] mg/dL increase	rs17145738-T	chr7	72620810	C/T	0.122	0.12	0.04196	0.062	Yes	-
	693	19060906	Kathiresan S	Nat Genet	HDL cholesterol	Other	2e-12	0.09	[0.05-0.13] s.d. decrease	rs174547-C	chr11	61327359	C/T	0.344	0.33	0.2793	0.098	Yes	-
	694	20864672	Waterworth DM	Arterioscler Thromb Vasc Biol	HDL cholesterol	Other	1e-12	0.01	[0.007-0.015] unit decrease	rs174548-G	chr11	61327924	C/G	0.301	0.17	0.2414	0.097	Yes	-
	695	19060911	Aulchenko YS	Nat Genet	HDL cholesterol	Other	4e-06	0.06	[NR] s.d. increase	rs174570-G	chr11	61353788	C/T	0.866	0.83	0.8993	0.972	Yes	-
	696	20031538	Heid IM	Circ Cardiovasc Genet	HDL cholesterol	Other	3e-11	2.02	[NR] mg/dl increase	rs17482753-T	chr8	19876926	G/T	0.107	0.11	0.1345	0.085	Yes	-
	697	20686565	Teslovich TM	Nature	HDL cholesterol	Other	1e-15	1.88	[1.41-2.35] mg/dL decrease	rs1800961-T	chr20	42475778	C/T	0.036	0.03	0.02857	0.023	Yes	-
	698	19060906	Kathiresan S	Nat Genet	HDL cholesterol	Other	8e-10	0.19	[0.09-0.29] s.d. decrease	rs1800961-T	chr20	42475778	C/T	0.036	0.03	0.02857	0.023	Yes	-
	699	21909109	Kim YJ	Nat Genet	HDL cholesterol	Other	6e-06	0.02	[0.012-0.029] mg/dL decrease	rs2072134-A	chr12	111893559	A/G	0	0.11	0	0	Yes	-
	700	21909109	Kim YJ	Nat Genet	HDL cholesterol	Other	7e-37	0.04	[0.030-0.040] mg/dL decrease	rs2074356-T	chr12	111129784	A/G	0	0.15	0	0	Yes	-
	701	18193043	Willer CJ	Nat Genet	HDL cholesterol	Other	3e-14	1.11	[NR] mg/dl higher	rs2144300-T	chr1	228361539	C/T	0.568	0.6	0.5	0.369	Yes	-
	702	20864672	Waterworth DM	Arterioscler Thromb Vasc Biol	HDL cholesterol	Other	2e-12	0.03	[0.02-0.04] unit increase	rs2156552-T	chr18	45435666	A/T	0.81	0.81	0.91844	0.892	Yes	-
	703	18193044	Kathiresan S	Nat Genet	HDL cholesterol	Other	2e-07	0.07	[0.05-0.09] % SD lower	rs2156552-A	chr18	45435666	A/T	0.19	0.18	0.08156	0.108	Yes	-
	704	18193043	Willer CJ	Nat Genet	HDL cholesterol	Other	6e-12	1.2	[NR] mg/dl higher	rs2156552-T	chr18	45435666	A/T	0.81	0.84	0.91844	0.892	Yes	-
	705	19060911	Aulchenko YS	Nat Genet	HDL cholesterol	Other	8e-16	0.13	[NR] s.d. decrease	rs2271293-G	chr16	66459571	A/G	0.907	0.87	0.8037	0.898	Yes	-
	706	19060906	Kathiresan S	Nat Genet	HDL cholesterol	Other	9e-13	0.07	[0.01-0.13] s.d. increase	rs2271293-A	chr16	66459571	A/G	0.093	0.11	0.1963	0.102	Yes	-
	707	19060906	Kathiresan S	Nat Genet	HDL cholesterol	Other	1e-10	0.07	[0.03-0.11] s.d. decrease	rs2338104-C	chr12	108379551	C/G	0.482	0.45	0.4655	0.688	Yes	-
	708	18193043	Willer CJ	Nat Genet	HDL cholesterol	Other	3e-08	0.48	[NR] mg/dl higher	rs2338104-G	chr12	108379551	C/G	0.518	0.45	0.5345	0.312	Yes	-
	709	18193043	Willer CJ	Nat Genet	HDL cholesterol	Other	1e-07	0.74	[NR] mg/dl higher	rs255052-A	chr16	66582496	A/G	0.139	0.17	0.2308	0.131	Yes	-
	710	20686565	Teslovich TM	Nature	HDL cholesterol	Other	4e-09	0.49	[0.29-0.69] mg/dL decrease	rs2814944-A	chr6	34660775	A/G	0.143	0.16	0.09783	0.114	Yes	-
	711	20686565	Teslovich TM	Nature	HDL cholesterol	Other	5e-08	0.41	[0.21-0.61] mg/dL decrease	rs2923084-G	chr11	10345358	A/G	0.155	0.17	0.05634	0.131	Yes	-
	712	19060906	Kathiresan S	Nat Genet	HDL cholesterol	Other	1e-08	0.12	[0.04-0.20] s.d. decrease	rs2967605-T	chr19	8375738	C/T	0.173	0.16	0.2897	0.25	Yes	-
	713	20864672	Waterworth DM	Arterioscler Thromb Vasc Biol	HDL cholesterol	Other	5e-07	0.02	[0.01-0.03] unit increase	rs3890182-G	chr9	106687476	A/G	0.92	0.88	0.8586	0.926	Yes	-
	714	18193044	Kathiresan S	Nat Genet	HDL cholesterol	Other	3e-10	0.1	[0.06-0.14] % SD lower	rs3890182-A	chr9	106687476	A/G	0.08	0.13	0.1414	0.074	Yes	-
	715	19060911	Aulchenko YS	Nat Genet	HDL cholesterol	Other	9e-13	0.11	[NR] s.d. increase	rs3905000-G	chr9	106696891	A/G	0.916	0.86	0.8497	0.915	Yes	-
	716	18193043	Willer CJ	Nat Genet	HDL cholesterol	Other	1e-10	0.82	[NR] mg/dl higher	rs4149268-C	chr9	106687041	C/T	0.721	0.64	0.4317	0.425	Yes	-
	717	20686565	Teslovich TM	Nature	HDL cholesterol	Other	4e-21	1.06	[0.82-1.3] mg/dL decrease	rs4420638-G	chr19	50114786	A/G	0.183	0.17	0.2345	0.057	Yes	-
	718	20686565	Teslovich TM	Nature	HDL cholesterol	Other	4e-10	0.48	[0.3-0.66] mg/dL decrease	rs4660293-G	chr1	39800767	A/G	0.257	0.23	0.1448	0.057	Yes	-
	719	19060906	Kathiresan S	Nat Genet	HDL cholesterol	Other	3e-10	0.08	[0.02-0.14] s.d. decrease	rs471364-C	chr9	15279578	C/T	0.106	0.12	0.04138	0.08	Yes	-
	720	20686565	Teslovich TM	Nature	HDL cholesterol	Other	3e-10	0.44	[0.28-0.6] mg/dL increase	rs4765127-T	chr12	123026120	G/T	0.385	0.34	0.3785	0.195	Yes	-
	721	18193043	Willer CJ	Nat Genet	HDL cholesterol	Other	3e-20	1.38	[NR] mg/dl higher	rs4775041-C	chr15	56461987	C/G	0.318	0.33	0.2971	0.233	Yes	-
	722	20686565	Teslovich TM	Nature	HDL cholesterol	Other	4e-21	0.61	[0.47-0.75] mg/dL decrease	rs4846914-G	chr1	228362314	A/G	0.429	0.39	0.4931	0.636	Yes	-
	723	19060906	Kathiresan S	Nat Genet	HDL cholesterol	Other	4e-08	0.05	[0.01-0.09] s.d. decrease	rs4846914-G	chr1	228362314	A/G	0.429	0.4	0.4931	0.636	Yes	-
	724	18193044	Kathiresan S	Nat Genet	HDL cholesterol	Other	2e-13	0.07	[0.05-0.09] % SD lower	rs4846914-G	chr1	228362314	A/G	0.429	0.4	0.4931	0.636	Yes	-
	725	19060911	Aulchenko YS	Nat Genet	HDL cholesterol	Other	2e-11	0.1	[NR] s.d. increase	rs4939883-G	chr18	45421212	C/T	0.81	0.83	0.91319	0.892	Yes	-
	726	19060906	Kathiresan S	Nat Genet	HDL cholesterol	Other	7e-15	0.14	[0.10-0.18] s.d. decrease	rs4939883-T	chr18	45421212	C/T	0.19	0.17	0.08681	0.108	Yes	-
	727	21909109	Kim YJ	Nat Genet	HDL cholesterol	Other	8e-11	0.02	[0.012-0.023] mg/dL decrease	rs519113-C	chr19	50068124	C/G	0.765	0.15	0.7374	0.615	Yes	-
	728	20864672	Waterworth DM	Arterioscler Thromb Vasc Biol	HDL cholesterol	Other	7e-09	0.01	[0.009-0.017] unit decrease	rs643531-C	chr9	15286034	A/C	0.146	0.07	0.04861	0.074	Yes	-
	729	20031538	Heid IM	Circ Cardiovasc Genet	HDL cholesterol	Other	5e-10	2.27	[NR] mg/dl decrease	rs7240405-A	chr18	45413088	A/G	0.186	0.15	0.08276	0.108	Yes	-
	730	19060911	Aulchenko YS	Nat Genet	HDL cholesterol	Other	6e-11	0.07	[NR] s.d. decrease	rs7395662-G	chr11	48475469	A/G	0.642	0.61	0.5586	0.364	Yes	-
	731	20686565	Teslovich TM	Nature	HDL cholesterol	Other	3e-14	0.61	[0.43-0.79] mg/dL increase	rs838880-C	chr12	123827546	C/T	0.288	0.31	0.3889	0.437	Yes	-
	732	20864672	Waterworth DM	Arterioscler Thromb Vasc Biol	HDL cholesterol	Other	2e-11	0.03	[0.02-0.04] unit decrease	rs964184-G	chr11	116154127	C/G	0.121	0.12	0.1771	0.176	Yes	-
	733	20686565	Teslovich TM	Nature	HDL cholesterol	Other	5e-47	1.5	[1.28-1.72] mg/dL decrease	rs964184-G	chr11	116154127	C/G	0.121	0.13	0.1771	0.176	Yes	-
	734	19060906	Kathiresan S	Nat Genet	HDL cholesterol	Other	1e-12	0.17	[0.11-0.23] s.d. decrease	rs964184-G	chr11	116154127	C/G	0.121	0.14	0.1771	0.176	Yes	-
	735	19060910	Sabatti C	Nat Genet	HDL cholesterol	Other	2e-07	0.05	[0.048-0.051] mmol/l increase	rs9891572-A	chr17	2375258	C/T	0.124	0.16	0.1007	0.239	Yes	-
	736	20864672	Waterworth DM	Arterioscler Thromb Vasc Biol	HDL cholesterol	Other	1e-32	0.04	[0.03-0.05] unit increase	rs9989419-G	chr16	55542640	A/G	0.602	0.6	0.6138	0.591	Yes	-
	737	20031538	Heid IM	Circ Cardiovasc Genet	HDL cholesterol	Other	9e-27	2.66	[NR] mg/dl decrease	rs9989419-A	chr16	55542640	A/G	0.398	0.38	0.3862	0.409	Yes	-
	738	18193043	Willer CJ	Nat Genet	HDL cholesterol	Other	3e-31	1.72	[NR] mg/dl higher	rs9989419-G	chr16	55542640	A/G	0.602	0.65	0.6138	0.591	Yes	-
	739	20881960	Lango Allen H	Nature	Height	Other	2e-18	0.03	[NR] unit increase	rs10037512-T	chr5	88390431	C/T	0.527	0.56	0.4479	0.591	Yes	-
	740	18391950	Lettre G	Nat Genet	Height	Other	3e-20	0.48	[0.58-1.09] cm shorter	rs1042725-T	chr12	64644614	C/T	0.504	0.49	0.6181	0.688	Yes	-
	741	18391952	Weedon MN	Nat Genet	Height	Other	3e-18	0.05	[0.03-0.08] s.d. taller - among males	rs1042725-C	chr12	64644614	C/T	0.496	0.49	0.3819	0.312	Yes	-
	742	17767157	Weedon MN	Nat Genet	Height	Other	6e-16	0.4	[NR] cm per copy in adult height	rs1042725-C	chr12	64644614	C/T	0.496	0.51	0.3819	0.312	Yes	-
	743	18391952	Weedon MN	Nat Genet	Height	Other	4e-11	0.05	[0.02-0.07] s.d. taller - among males	rs10512248-G	chr9	97299524	G/T	0.35	0.31	0.2379	0.21	Yes	-
	744	19893584	Kim JJ	J Hum Genet	Height	Other	8e-08	0.49	[NR] cm increase	rs10513137-A	chr3	142626120	A/G	0.088	0.26	0.05072	0.102	Yes	-
	745	19396169	Cho YS	Nat Genet	Height	Other	6e-12	0.46	[0.33-0.59] cm increase	rs10513137-A	chr3	142626120	A/G	0.088	0.26	0.05072	0.102	Yes	-
	746	18391951	Gudbjartsson DF	Nat Genet	Height	Other	1e-06	6.9	[4.16-9.64] % s.d. taller	rs1052483-C	chr2	219642592	G/T	0.89	0.91	0.93841	0.971	Yes	-
	747	19030899	Lei SF	Hum Genet	Height	Other	2e-06	NR	NR	rs10816533-C	chr9	98578959	C/G	0.018	0.29	0.131	0.097	Yes	-
	748	20397748	Liu JZ	Twin Res Hum Genet	Height	Other	5e-07	0.07	[0.03-0.11] SD increase	rs10906982-A	chr15	82359162	A/T	0.496	0.52	0.6181	0.619	Yes	-
	749	18391952	Weedon MN	Nat Genet	Height	Other	2e-08	0.05	[0.02-0.07] s.d. taller - among males	rs10906982-A	chr15	82359162	A/T	0.496	0.52	0.6181	0.619	Yes	-
	750	18391952	Weedon MN	Nat Genet	Height	Other	7e-08	0.06	[0.03-0.09] s.d. shorter - among males	rs10935120-A	chr3	135715782	A/G	0.301	0.33	0.3741	0.398	Yes	-
	751	19893584	Kim JJ	J Hum Genet	Height	Other	2e-06	0.4	[NR] cm decrease	rs10961780-G	chr9	14888161	G/T	0.137	0.33	0.05517	0.108	Yes	-
	752	18391952	Weedon MN	Nat Genet	Height	Other	6e-10	0.04	[0.01-0.07] s.d. shorter - among males	rs11107116-G	chr12	92502635	G/T	0.788	0.77	0.8264	0.892	Yes	-
	753	22021425	Carty CL	Hum Mol Genet	Height	Other	5e-10	0.05	[0.029-0.069] unit decrease	rs11658329-G	chr17	59116763	C/G	0.721	0.3	0.7986	0.818	Yes	-
	754	21998595	N'Diaye A	PLoS Genet	Height	Other	6e-10	0.05	[0.035-0.071] unit increase	rs11658329-C	chr17	59116763	C/G	0.279	0.7	0.2014	0.182	Yes	-
	755	20881960	Lango Allen H	Nature	Height	Other	1e-13	0.03	[NR] unit decrease	rs11684404-T	chr2	88705737	C/T	0.668	0.67	0.7482	0.552	Yes	-
	756	20966902	Croteau-Chonka DC	Obesity (Silver Spring)	Height	Other	2e-06	1.05	[0.62-1.48] cm increase	rs11888559-T	chr2	203873416	C/T	0.049	0.15	0.08451	0.114	Yes	-
	757	19893584	Kim JJ	J Hum Genet	Height	Other	6e-06	0.36	[NR] cm decrease	rs11989122-T	chr8	118897020	A/G	0.624	0.48	0.6632	0.636	Yes	-
	758	18391951	Gudbjartsson DF	Nat Genet	Height	Other	7e-07	4.4	[2.64-6.16] % s.d. taller	rs12199222-T	chr6	17807301	G/T	0.257	0.33	0.1793	0.114	Yes	-
	759	21998595	N'Diaye A	PLoS Genet	Height	Other	5e-06	0.05	[0.030-0.074] unit increase	rs12321906-T	chr12	52202982	C/T	0.991	0.87	0.993103	0.943	Yes	-
	760	18391951	Gudbjartsson DF	Nat Genet	Height	Other	8e-06	3.8	[2.23-5.37] % s.d. taller	rs1239947-G	chr13	50004556	C/T	0.336	0.35	0.3671	0.398	Yes	-
	761	18391950	Lettre G	Nat Genet	Height	Other	2e-06	0.25	[0.15-0.35] cm taller	rs12449568-C	chr17	51785154	C/T	0.46	0.47	0.4643	0.619	Yes	-
	762	20881960	Lango Allen H	Nature	Height	Other	3e-13	0.03	[NR] meters increase	rs12474201-A	chr2	46774789	A/G	0.314	0.35	0.3552	0.301	Yes	-
	763	20881960	Lango Allen H	Nature	Height	Other	2e-14	0.03	[NR] unit increase	rs12680655-C	chr8	135706519	C/G	0.619	0.6	0.7034	0.523	Yes	-
	764	18391952	Weedon MN	Nat Genet	Height	Other	4e-11	0.08	[0.05-0.11] s.d. shorter - among males	rs12735613-A	chr1	118685496	A/G	0.265	0.24	0.1771	0.267	Yes	-
	765	18391950	Lettre G	Nat Genet	Height	Other	3e-08	0.31	[0.21-0.46] cm taller	rs12986413-T	chr19	2121954	A/T	0.459	0.45	0.5432	0.415	Yes	-
	766	19893584	Kim JJ	J Hum Genet	Height	Other	3e-06	0.75	[NR] cm decrease	rs13273123-C	chr8	57263345	A/G	0.142	0.07	0.2283	0.153	Yes	-
	767	19396169	Cho YS	Nat Genet	Height	Other	1e-09	0.71	[0.48-0.94] cm decrease	rs13273123-G	chr8	57263345	A/G	0.142	0.07	0.2283	0.153	Yes	-
	768	20881960	Lango Allen H	Nature	Height	Other	2e-14	0.03	[NR] unit increase	rs1351164-T	chr2	217980143	C/T	0.805	0.79	0.7518	0.585	Yes	-
	769	18391952	Weedon MN	Nat Genet	Height	Other	5e-09	0.04	[0.01-0.08] s.d. taller - among males	rs1390401-A	chr1	225864573	A/G	0.754	0.82	0.9375	0.784	Yes	-
	770	19570815	Estrada K	Hum Mol Genet	Height	Other	2e-07	0.25	[0.03-0.47] cm increase	rs139909-T	chr22	39027527	C/T	0.699	0.68	0.5734	0.784	Yes	-
	771	19893584	Kim JJ	J Hum Genet	Height	Other	9e-07	0.56	[NR] cm decrease	rs1520223-C	chr12	101250468	C/T	0	0.26	0.006897	0.028	Yes	-
	772	22021425	Carty CL	Hum Mol Genet	Height	Other	6e-09	0.05	[0.024-0.072] unit decrease	rs1549519-T	chr17	51112786	C/T	0.788	0.2	0.723	0.767	Yes	-
	773	20881960	Lango Allen H	Nature	Height	Other	2e-10	0.02	[NR] meters decrease	rs1582931-A	chr5	122685098	A/G	0.473	0.47	0.631	0.659	Yes	-
	774	20189936	Okada Y	Hum Mol Genet	Height	Other	5e-06	0.05	[0.03-0.07] cm increase	rs16859517-T	chr2	219657428	C/T	0.031	0.39	0.03147	0.08	Yes	-
	775	19893584	Kim JJ	J Hum Genet	Height	Other	3e-06	0.53	[NR] cm decrease	rs16910061-T	chr9	96354562	A/G	0.031	0.14	0.06897	0.097	Yes	-
	776	19396169	Cho YS	Nat Genet	Height	Other	5e-07	0.3	[0.18-0.42] cm decrease	rs17038182-C	chr1	118669928	C/G	0.284	0.42	0.219	0.273	Yes	-
	777	20881960	Lango Allen H	Nature	Height	Other	5e-16	0.03	[NR] unit increase	rs17318596-A	chr19	46628935	A/G	0.371	0.36	0.4196	0.403	Yes	-
	778	20881960	Lango Allen H	Nature	Height	Other	2e-11	0.04	[NR] meters increase	rs17391694-T	chr1	78396214	C/T	0.119	0.12	0.03448	0.011	Yes	-
	779	20881960	Lango Allen H	Nature	Height	Other	3e-09	0.02	[NR] meters decrease	rs1741344-T	chr20	4049800	C/T	0.637	0.63	0.8597	0.79	Yes	-
	780	20881960	Lango Allen H	Nature	Height	Other	2e-18	0.06	[NR] unit decrease	rs17511102-A	chr2	37814117	A/T	0.947	0.91	0.9507	0	Yes	-
	781	20881960	Lango Allen H	Nature	Height	Other	4e-11	0.03	[NR] meters decrease	rs17782313-T	chr18	56002077	C/T	0.735	0.76	0.8042	0.699	Yes	-
	782	22021425	Carty CL	Hum Mol Genet	Height	Other	7e-10	0.04	[0.024-0.064] unit increase	rs1787200-T	chr18	44841652	A/G	0.885	0.37	0.8724	0.642	Yes	-
	783	21998595	N'Diaye A	PLoS Genet	Height	Other	1e-10	0.05	[0.037-0.069] unit increase	rs1787200-A	chr18	44841652	A/G	0.885	0.37	0.8724	0.642	Yes	-
	784	20397748	Liu JZ	Twin Res Hum Genet	Height	Other	1e-09	0.12	[0.07-0.17] SD decrease	rs1812175-C	chr4	145794294	A/G	0.835	0.83	0.8993	0.869	Yes	-
	785	18391951	Gudbjartsson DF	Nat Genet	Height	Other	1e-11	8.3	[5.95-10.65] % s.d. taller	rs1812175-C	chr4	145794294	A/G	0.835	0.86	0.8993	0.869	Yes	-
	786	19893584	Kim JJ	J Hum Genet	Height	Other	3e-06	0.4	[NR] cm increase	rs2079795-T	chr17	56851431	C/T	0.314	0.33	0.4813	0.415	Yes	-
	787	18391951	Gudbjartsson DF	Nat Genet	Height	Other	1e-08	5.8	[3.84-7.76] % s.d. taller	rs2282978-C	chr7	92102346	C/T	0.412	0.29	0.2841	0.148	Yes	-
	788	18391952	Weedon MN	Nat Genet	Height	Other	8e-23	0.09	[0.06-0.12] s.d. taller - among males	rs2282978-C	chr7	92102346	C/T	0.412	0.33	0.2841	0.148	Yes	-
	789	19893584	Kim JJ	J Hum Genet	Height	Other	8e-06	0.51	[NR] cm decrease	rs2292303-C	chr12	101037661	C/G	0.009	0.3	0.006897	0.028	Yes	-
	790	19893584	Kim JJ	J Hum Genet	Height	Other	8e-06	1.9	[NR] cm increase	rs2315504-C	chr17	36300407	A/C	0.442	0.01	0.4345	0.261	Yes	-
	791	21998595	N'Diaye A	PLoS Genet	Height	Other	6e-08	0.06	[0.036-0.076] unit increase	rs2553026-A	chr2	217831893	A/G	0.717	0.19	0.479	0.5	Yes	-
	792	18391950	Lettre G	Nat Genet	Height	Other	6e-08	0.34	[0.21-0.48] cm taller	rs2562784-G	chr15	82077496	A/G	0.212	0.17	0.4184	0.276	Yes	-
	793	18391951	Gudbjartsson DF	Nat Genet	Height	Other	9e-07	5.4	[3.24-7.56] % s.d. taller	rs2814828-T	chr9	90001002	C/T	0.261	0.25	0.1597	0.312	Yes	-
	794	18391952	Weedon MN	Nat Genet	Height	Other	4e-12	0.09	[0.05-0.13] s.d. taller - among males	rs2814993-A	chr6	34726871	A/G	0.128	0.15	0.09259	0.102	Yes	-
	795	21998595	N'Diaye A	PLoS Genet	Height	Other	5e-08	0.05	[0.033-0.073] unit decrease	rs2854160-T	chr17	59330980	C/T	0.336	0.21	0.3924	0.598	Yes	-
	796	20881960	Lango Allen H	Nature	Height	Other	7e-09	0.02	[NR] meters decrease	rs3110496-A	chr17	24941897	A/G	0.314	0.33	0.4255	0.386	Yes	-
	797	18391951	Gudbjartsson DF	Nat Genet	Height	Other	8e-06	4.8	[2.64-6.96] % s.d. taller	rs31198-T	chr5	134400584	C/T	0.73	0.75	0.6678	0.523	Yes	-
	798	18391951	Gudbjartsson DF	Nat Genet	Height	Other	5e-14	6.5	[5.44-9.36] % s.d. taller	rs3748069-A	chr6	142809326	A/G	0.719	0.74	0.6329	0.739	Yes	-
	799	20881960	Lango Allen H	Nature	Height	Other	4e-13	0.06	[NR] unit decrease	rs3782089-T	chr11	65093395	C/T	0.049	0.06	0.06985	0.233	Yes	-
	800	20397748	Liu JZ	Twin Res Hum Genet	Height	Other	3e-07	0.09	[0.04-0.14] SD increase	rs3791675-C	chr2	55964813	C/T	0.748	0.77	0.6897	0.807	Yes	-
	801	19893584	Kim JJ	J Hum Genet	Height	Other	4e-06	0.45	[NR] cm increase	rs3791675-G	chr2	55964813	C/T	0.748	0.23	0.6897	0.807	Yes	-
	802	19396169	Cho YS	Nat Genet	Height	Other	2e-09	0.42	[0.28-0.56] cm increase	rs3791675-G	chr2	55964813	C/T	0.748	0.22	0.6897	0.807	Yes	-
	803	18391952	Weedon MN	Nat Genet	Height	Other	2e-12	0.09	[0.05-0.12] s.d. taller - among males	rs3791675-C	chr2	55964813	C/T	0.748	0.77	0.6897	0.807	Yes	-
	804	22021425	Carty CL	Hum Mol Genet	Height	Other	3e-08	0.06	[0.029-0.083] unit decrease	rs3889237-C	chr17	62209892	G/T	0.584	0.14	0.6295	0.636	Yes	-
	805	19893584	Kim JJ	J Hum Genet	Height	Other	7e-06	0.37	[NR] cm decrease	rs41464348-T	chr2	33380803	A/G	0.54	0.35	0.463	0.5	Yes	-
	806	18391951	Gudbjartsson DF	Nat Genet	Height	Other	3e-08	5.6	[3.64-7.56] % s.d. taller	rs4533267-A	chr15	98603794	A/G	0.296	0.28	0.2034	0.21	Yes	-
	807	18391952	Weedon MN	Nat Genet	Height	Other	5e-13	0.06	[0.03-0.08] s.d. taller - among males	rs4549631-C	chr6	127008001	C/T	0.456	0.5	0.3803	0.67	Yes	-
	808	20881960	Lango Allen H	Nature	Height	Other	2e-12	0.03	[NR] meters decrease	rs4601530-T	chr1	24916698	C/T	0.252	0.26	0.5103	0.398	Yes	-
	809	18391951	Gudbjartsson DF	Nat Genet	Height	Other	4e-08	6.8	[4.45-9.15] % s.d. taller	rs4713858-G	chr6	35510763	A/G	0.848	0.86	0.759	0.807	Yes	-
	810	18391951	Gudbjartsson DF	Nat Genet	Height	Other	2e-08	5.3	[3.54-7.06] % s.d. taller	rs4743034-A	chr9	108672174	A/G	0.212	0.23	0.2727	0.381	Yes	-
	811	18391951	Gudbjartsson DF	Nat Genet	Height	Other	1e-07	3.6	[2.23-4.97] % s.d. taller	rs4794665-A	chr17	52205328	A/G	0.544	0.48	0.5245	0.511	Yes	-
	812	19893584	Kim JJ	J Hum Genet	Height	Other	6e-06	0.7	[NR] cm increase	rs4811971-C	chr20	56230190	A/G	0.332	0.39	0.1923	0.345	Yes	-
	813	20189936	Okada Y	Hum Mol Genet	Height	Other	1e-07	0.06	[0.04-0.08] cm decrease	rs4842838-G	chr15	82373128	G/T	0.504	0.29	0.3862	0.381	Yes	-
	814	20189936	Okada Y	Hum Mol Genet	Height	Other	8e-08	0.06	[0.04-0.08] cm increase	rs4886707-T	chr15	73542520	C/T	0.221	0.42	0.3828	0.466	Yes	-
	815	18391950	Lettre G	Nat Genet	Height	Other	1e-16	0.44	[0.34-0.72] cm taller	rs6060369-C	chr20	33370575	C/T	0.336	0.36	0.5586	0.676	Yes	-
	816	18193045	Sanna S	Nat Genet	Height	Other	2e-16	0.44	[NR] cm taller	rs6060369-C	chr20	33370575	C/T	0.336	0.44	0.5586	0.676	Yes	-
	817	18391952	Weedon MN	Nat Genet	Height	Other	2e-17	0.08	[0.05-0.11] s.d. shorter - among males	rs6060373-A	chr20	33377622	A/G	0.664	0.62	0.4214	0.318	Yes	-
	818	18391951	Gudbjartsson DF	Nat Genet	Height	Other	8e-07	4.7	[2.74-6.66] % s.d. taller	rs6088792-T	chr20	33373198	C/T	0.274	0.26	0.2621	0.29	Yes	-
	819	21998595	N'Diaye A	PLoS Genet	Height	Other	7e-07	0.04	[0.025-0.057] unit increase	rs6435999-A	chr2	218231407	A/G	0.996	0.64	0.96897	0.926	Yes	-
	820	20881960	Lango Allen H	Nature	Height	Other	9e-15	0.03	[NR] unit decrease	rs6439167-T	chr3	130533446	C/T	0.212	0.21	0.2378	0.17	Yes	-
	821	20189936	Okada Y	Hum Mol Genet	Height	Other	6e-06	0.05	[0.03-0.07] cm increase	rs6563943-A	chr16	82196836	A/G	0.319	0.32	0.3768	0.374	Yes	-
	822	20881960	Lango Allen H	Nature	Height	Other	1e-21	0.04	[NR] unit decrease	rs6569648-T	chr6	130390812	C/T	0.765	0.76	0.8486	0.892	Yes	-
	823	20397748	Liu JZ	Twin Res Hum Genet	Height	Other	2e-07	0.08	[0.04-0.12] SD increase	rs6570507-G	chr6	142721265	A/G	0.735	0.71	0.6329	0.739	Yes	-
	824	18391952	Weedon MN	Nat Genet	Height	Other	2e-08	0.05	[0.02-0.08] s.d. shorter - among males	rs6686842-C	chr1	41303458	C/T	0.619	0.56	0.6725	0.722	Yes	-
	825	20881960	Lango Allen H	Nature	Height	Other	5e-09	0.02	[NR] meters increase	rs6699417-T	chr1	88896031	C/T	0.619	0.61	0.7724	0.778	Yes	-
	826	18391952	Weedon MN	Nat Genet	Height	Other	2e-08	0.06	[0.02-0.10] s.d. shorter - among males	rs6724465-A	chr2	219652090	A/G	0.106	0.1	0.05172	0.028	Yes	-
	827	18391951	Gudbjartsson DF	Nat Genet	Height	Other	3e-08	5.4	[3.44-7.36] % s.d. taller	rs678962-G	chr1	170456512	G/T	0.115	0.22	0.2172	0.216	Yes	-
	828	20397748	Liu JZ	Twin Res Hum Genet	Height	Other	8e-06	0.09	[0.04-0.14] SD increase	rs6830062-T	chr4	17626828	C/T	0.885	0.84	0.8803	0.767	Yes	-
	829	18391951	Gudbjartsson DF	Nat Genet	Height	Other	1e-10	6.3	[4.34-8.26] % s.d. taller	rs6830062-T	chr4	17626828	C/T	0.885	0.89	0.8803	0.767	Yes	-
	830	18391952	Weedon MN	Nat Genet	Height	Other	2e-09	0.06	[0.03-0.08] s.d. taller - among males	rs6854783-A	chr4	145862529	A/G	0.549	0.43	0.7086	0.756	Yes	-
	831	19893584	Kim JJ	J Hum Genet	Height	Other	2e-08	0.55	[NR] cm increase	rs6918981-G	chr6	34346492	A/G	0.195	0.21	0.1414	0.142	Yes	-
	832	19396169	Cho YS	Nat Genet	Height	Other	3e-08	0.4	[0.26-0.54] cm increase	rs6918981-G	chr6	34346492	A/G	0.195	0.21	0.1414	0.142	Yes	-
	833	19893584	Kim JJ	J Hum Genet	Height	Other	3e-06	1.32	[NR] cm increase	rs7032940-A	chr9	111985226	A/G	0.208	0.21	0.3345	0.176	Yes	-
	834	20881960	Lango Allen H	Nature	Height	Other	9e-10	0.02	[NR] meters decrease	rs7112925-T	chr11	66582736	C/T	0.387	0.35	0.3979	0.597	Yes	-
	835	18391951	Gudbjartsson DF	Nat Genet	Height	Other	1e-10	5.7	[3.94-7.46] % s.d. taller	rs7153027-A	chr14	91496975	A/C	0.631	0.52	0.4437	0.613	Yes	-
	836	18391950	Lettre G	Nat Genet	Height	Other	8e-22	0.37	[0.29-0.45] cm taller	rs724016-G	chr3	142588260	A/G	0.42	0.48	0.2517	0.273	Yes	-
	837	18193045	Sanna S	Nat Genet	Height	Other	1e-06	0.61	[NR] cm taller	rs724016-G	chr3	142588260	A/G	0.42	0.36	0.2517	0.273	Yes	-
	838	21998595	N'Diaye A	PLoS Genet	Height	Other	2e-06	0.04	[0.023-0.059] unit decrease	rs733254-A	chr8	135707814	A/C	0.252	0.27	0.2103	0.409	Yes	-
	839	18391951	Gudbjartsson DF	Nat Genet	Height	Other	1e-06	8.7	[5.17-12.23] % s.d. taller	rs749052-A	chr2	232504854	C/T	0.92	0.94	0.8854	0.931	Yes	-
	840	20189936	Okada Y	Hum Mol Genet	Height	Other	9e-09	0.06	[0.04-0.08] cm increase	rs7571816-A	chr2	232785308	A/G	0.969	0.45	0.97931	0.915	Yes	-
	841	20881960	Lango Allen H	Nature	Height	Other	2e-14	0.03	[NR] unit increase	rs7697556-T	chr4	73734177	C/T	0.46	0.47	0.3706	0.648	Yes	-
	842	20189936	Okada Y	Hum Mol Genet	Height	Other	8e-10	0.12	[0.08-0.16] cm decrease	rs7833986-A	chr8	57262703	A/G	0.146	0.08	0.2571	0.153	Yes	-
	843	18391951	Gudbjartsson DF	Nat Genet	Height	Other	5e-08	5	[3.24-6.76] % s.d. taller	rs7846385-C	chr8	78322734	C/T	0.288	0.27	0.2902	0.375	Yes	-
	844	20881960	Lango Allen H	Nature	Height	Other	2e-08	0.02	[NR] meters increase	rs7864648-T	chr9	16358732	G/T	0.341	0.32	0.4433	0.46	Yes	-
	845	22021425	Carty CL	Hum Mol Genet	Height	Other	4e-10	0.04	[0.025-0.061] unit decrease	rs7968682-T	chr12	64658147	G/T	0.527	0.58	0.6835	0.759	Yes	-
	846	18391951	Gudbjartsson DF	Nat Genet	Height	Other	7e-15	5.9	[6.03-8.77] % s.d. taller	rs798544-G	chr7	2729628	C/T	0.699	0.72	0.9	0.83	Yes	-
	847	20189936	Okada Y	Hum Mol Genet	Height	Other	3e-06	0.05	[0.03-0.07] cm decrease	rs8002779-A	chr13	90813978	A/G	0.59	0.48	0.5536	0.551	Yes	-
	848	18391952	Weedon MN	Nat Genet	Height	Other	8e-08	0.04	[0.01-0.06] s.d. taller - among males	rs8041863-A	chr15	87160693	A/T	0.496	0.47	0.4783	0.591	Yes	-
	849	18391952	Weedon MN	Nat Genet	Height	Other	3e-07	0.05	[0.02-0.08] s.d. taller - among males	rs8099594-A	chr18	45245158	A/G	0.602	0.65	0.5312	0.557	Yes	-
	850	20881960	Lango Allen H	Nature	Height	Other	2e-12	0.03	[NR] meters decrease	rs891088-A	chr19	7135762	A/G	0.739	0.74	0.6294	0.574	Yes	-
	851	22021425	Carty CL	Hum Mol Genet	Height	Other	3e-14	0.06	[0.036-0.076] unit increase	rs925098-G	chr4	17528909	A/G	0.344	0.35	0.1319	0.153	Yes	-
	852	18391951	Gudbjartsson DF	Nat Genet	Height	Other	2e-08	4.3	[2.73-5.87] % s.d. taller	rs967417-C	chr20	6568893	A/G	0.593	0.53	0.741	0.653	Yes	-
	853	20189936	Okada Y	Hum Mol Genet	Height	Other	6e-09	0.07	[0.05-0.09] cm increase	rs9825379-A	chr3	142619725	A/G	0.071	0.24	0.03472	0.074	Yes	-
	854	20881960	Lango Allen H	Nature	Height	Other	4e-13	0.03	[NR] unit decrease	rs9863706-T	chr3	72520103	C/T	0.228	0.22	0.1655	0.193	Yes	-
	855	19862010	Ganesh SK	Nat Genet	Hematocrit	Other	6e-15	0.2	[0.15-0.25] % increase	rs10224002-G	chr7	151045974	A/G	0.286	NA	0.2448	0	Yes	-
	856	19862010	Ganesh SK	Nat Genet	Hematocrit	Other	2e-13	0.17	[0.13-0.22] % decrease	rs2413450-T	chr22	35800170	C/T	0.478	NA	0.5625	0.636	Yes	-
	857	20139978	Kamatani Y	Nat Genet	Hematological and biochemical traits	Other	3e-08	0.3	[NR] % variance	rs2280401-A	chr19	54691821	A/G	0.121	0.16	0.1373	0.142	Yes	-
	858	20139978	Kamatani Y	Nat Genet	Hematological and biochemical traits	Other	3e-08	0.21	[NR] % variance	rs2736100-G	chr5	1339516	A/C	0.527	0.4	0.5603	0.645	Yes	-
	859	20139978	Kamatani Y	Nat Genet	Hematological and biochemical traits	Other	7e-09	0.22	[NR] % variance	rs3094212-C	chr6	31193749	A/G	0.518	0.35	0.3759	0.335	Yes	-
	860	20139978	Kamatani Y	Nat Genet	Hematological and biochemical traits	Other	4e-08	0.21	[NR] % variance	rs470119-T	chr22	49313780	C/T	0.403	0.26	0.2782	0.278	Yes	-
	861	20139978	Kamatani Y	Nat Genet	Hematological and biochemical traits	Other	2e-09	0.25	[NR] % variance	rs4895441-G	chr6	135468266	A/G	0.23	0.37	0.2586	0.131	Yes	-
	862	20139978	Kamatani Y	Nat Genet	Hematological and biochemical traits	Other	1e-08	0.22	[NR] % variance	rs6092477-G	chr20	55425101	A/G	0.689	0.42	0.6146	0	Yes	-
	863	20139978	Kamatani Y	Nat Genet	Hematological and biochemical traits	Other	3e-08	0.21	[NR] % variance	rs7843479-A	chr8	21876759	A/C	0.398	0.29	0.3021	0.159	Yes	-
	864	20139978	Kamatani Y	Nat Genet	Hematological and biochemical traits	Other	1e-11	0.32	[NR] % variance	rs9820070-C	chr3	189169768	A/C	0.407	0.31	0.4317	0.227	Yes	-
	865	19820697	Soranzo N	Nat Genet	Hematological parameters	Other	7e-19	0.58	[0.44-0.70] fl increase	rs11970772-T	chr6	42033268	A/T	0.845	NA	0.7238	0.494	Yes	-
	866	19862010	Ganesh SK	Nat Genet	Hemoglobin	Other	3e-15	0.07	[0.05-0.09] g/dl increase	rs10224002-G	chr7	151045974	A/G	0.286	NA	0.2448	0	Yes	-
	867	22004137	Liu L	Viral Immunol	Hepatitis B	Other	2e-08	1.68	[1.40-2.02]	rs11866328-G	chr16	9770057	G/T	0.593	NA	0.7345	0.773	Yes	-
	868	21750111	Mbarek H	Hum Mol Genet	Hepatitis B	Other	2e-61	1.87	[1.73-2.01]	rs3077-G	chr6	33141000	A/G	0.155	0.6	0.191	0.358	Yes	-
	869	21750111	Mbarek H	Hum Mol Genet	Hepatitis B	Other	6e-28	1.81	[1.62-2.01]	rs7453920-G	chr6	32837990	A/G	0.522	0.83	0.7778	0.778	Yes	-
	870	20676096	Zhang H	Nat Genet	Hepatocellular carcinoma	Other	2e-18	1.64	[1.49-1.82]	rs17401966-A	chr1	10308058	A/G	0.681	0.72	0.6724	0.716	Yes	-
	871	21499248	Kumar V	Nat Genet	Hepatocellular carcinoma	Other	6e-09	1.3	[1.19-1.42]	rs9275572-A	chr6	32786977	A/G	0.394	0.36	0.4895	0.307	Yes	-
	872	18776929	Liu YZ	PLoS One	Hip bone size	Other	2e-06	5	[NR] cm2 increase in hip bone size on women	rs7595412-A	chr2	198670488	A/G	0.867	0.89	0.92143	0.943	Yes	-
	873	19196962	Garcia-Barcelo MM	Proc Natl Acad Sci U S A	Hirschsprung's disease	Other	2e-08	1.68	[1.40-2.00]	rs16879552-G	chr8	32530758	C/T	0.973	0.61	0.98276	0.898	Yes	-
	874	19196962	Garcia-Barcelo MM	Proc Natl Acad Sci U S A	Hirschsprung's disease	Other	4e-18	NR	NR	rs2742234-T	chr10	42932615	C/T	0.765	NA	0.6986	0.535	Yes	-
	875	21051598	Pereyra F	Science	HIV-1 control	Other	4e-16	2.1	[NR]	rs3131018-C	chr6	31251561	A/C	0.607	0.625	0.8147	0.716	Yes	-
	876	21909115	Ehret GB	Nature	Hypertension	Other	3e-10	0.06	[NR] unit increase	rs1173771-G	chr5	32850785	A/G	0.509	0.6	0.5786	0.625	Yes	-
	877	21082022	Padmanabhan S	PLoS Genet	Hypertension	Other	4e-11	1.15	[1.10-1.19]	rs13333226-A	chr16	20273155	A/G	0.823	0.81	0.8828	0.716	Yes	-
	878	19430479	Levy D	Nat Genet	Hypertension	Other	2e-07	0.13	[0.09-0.17] decrease in log odds	rs16982520-A	chr20	57192115	A/G	0.071	0.88	0.0625	0.041	Yes	-
	879	17554300	WTCCC	Nature	Hypertension	Other	6e-06	1.31	[1.03-1.67]	rs2398162-A	chr15	94631554	A/G	0.765	0.74	0.7101	0.682	Yes	-
	880	17554300	WTCCC	Nature	Hypertension	Other	8e-07	1.54	[1.03-2.31]	rs2820037-T	chr1	237503165	A/T	0.188	0.14	0.2014	0.148	Yes	-
	881	19609347	Adeyemo A	PLoS Genet	Hypertension	Other	5e-06	1.62	[NR]	rs991316-T	chr4	100541468	C/T	0.482	0.45	0.5174	0.705	Yes	-
	882	20657596	Johansen CT	Nat Genet	Hypertriglyceridemia	Hypertriglyceridemia	5e-24	3.28	[2.61-4.14]	rs964184-G	chr11	116154127	C/G	0.121	0.14	0.1771	0.176	No	Duplicated
	883	18835860	Mushiroda T	J Med Genet	Idiopathic pulmonary fibrosis	Other	3e-08	2.11	[1.61-2.78]	rs2736100-A	chr5	1339516	A/C	0.473	0.41	0.4397	0.355	Yes	-
	884	22197929	Yu XQ	Nat Genet	IgA nephropathy	Other	1e-11	1.28	[1.19-1.39]	rs12537-C	chr22	28753460	C/T	0.69	0.81	0.4759	0.5	Yes	-
	885	22197929	Yu XQ	Nat Genet	IgA nephropathy	Other	4e-07	1.15	[1.09-1.22]	rs4849121-G	chr2	111316177	A/G	0.54	NA	0.5276	0.557	Yes	-
	886	22036096	Ramasamy A	J Allergy Clin Immunol	IgE grass sensitization	Other	2e-06	1.18	[1.10-1.26]	rs631208-A	chr16	9307225	A/G	0.602	0.6	0.5966	0.5	Yes	-
	887	22036096	Ramasamy A	J Allergy Clin Immunol	IgE grass sensitization	Other	2e-09	1.33	[1.21-1.45]	rs7775228-C	chr6	32766057	C/T	0.124	0.13	0.1069	0.278	Yes	-
	888	20694011	Ferreira RC	Nat Genet	Immunoglobulin A	Other	2e-06	1.36	[1.19-1.55]	rs11038871-C	chr11	46336018	C/T	0.301	0.248	0.3873	0.341	Yes	-
	889	20694011	Ferreira RC	Nat Genet	Immunoglobulin A	Other	2e-33	2.53	[2.17-2.95]	rs2187668-A	chr6	32713862	C/T	0.08	0.13	0.1458	0.102	Yes	-
	890	20694011	Ferreira RC	Nat Genet	Immunoglobulin A	Other	9e-06	1.29	[1.15-1.46]	rs7029145-A	chr9	27872653	C/T	0.482	0.466	0.4645	0.364	Yes	-
	891	22291609	Naitza S	PLoS Genet	Inflammatory biomarkers	Other	9e-14	NR	NR	rs12034598-A	chr1	205824138	A/G	0.858	0.408	0.8077	0.517	Yes	-
	892	22291609	Naitza S	PLoS Genet	Inflammatory biomarkers	Other	2e-09	NR	NR	rs4910742-G	chr11	5263085	A/G	0.027	0.066	0.01399	0.091	Yes	-
	893	17068223	Duerr RH	Science	Inflammatory bowel disease	Other	4e-11	3.84	[2.33-6.66]	rs11209026-G	chr1	67478546	A/G	0.959	0.93	0.94964	0	Yes	-
	894	21699788	Okada Y	Gastroenterology	Inflammatory bowel disease	Other	4e-16	1.75	[1.53-1.99]	rs2006996-C	chr9	116632459	C/T	0.04	0.53	0.03448	0.108	Yes	-
	895	21699788	Okada Y	Gastroenterology	Inflammatory bowel disease	Other	4e-13	1.67	[1.47-1.92]	rs2006996-T	chr9	116632459	C/T	0.96	0.47	0.96552	0.892	Yes	-
	896	19915574	Imielinski M	Nat Genet	Inflammatory bowel disease (early onset)	Other	2e-09	1.14	[1.00-1.30]	rs8049439-G	chr16	28745016	C/T	0.385	0.37	0.241	0.307	Yes	-
	897	21130836	Luciano M	Biol Psychol	Information processing speed	Other	2e-06	0.12	[0.06-0.18] unit decrease	rs10490919-T	chr10	117502578	G/T	0.473	0.46	0.4828	0.483	Yes	-
	898	21130836	Luciano M	Biol Psychol	Information processing speed	Other	8e-06	0.24	[0.14-0.34] unit increase	rs11077773-T	chr17	70571668	C/T	0.92	0.06	0.7103	0.597	Yes	-
	899	21130836	Luciano M	Biol Psychol	Information processing speed	Other	3e-06	0.27	[0.15-0.39] unit decrease	rs17124581-T	chr14	87896435	C/T	0.956	0.06	0.93056	0.926	Yes	-
	900	21130836	Luciano M	Biol Psychol	Information processing speed	Other	9e-06	0.2	[0.10-0.30] unit increase	rs1884136-T	chr20	10798464	G/T	0.097	0.09	0.2218	0.267	Yes	-
	901	21130836	Luciano M	Biol Psychol	Information processing speed	Other	6e-06	0.27	[0.15-0.39] unit increase	rs2839627-T	chr21	43321787	C/T	0.124	0.11	0.1448	0.097	Yes	-
	902	21130836	Luciano M	Biol Psychol	Information processing speed	Other	9e-06	0.37	[0.21-0.53] unit decrease	rs7283316-A	chr21	31138124	A/G	0.438	0.38	0.4306	0.352	Yes	-
	903	21901158	Irvin MR	PLoS One	Insulin resistance/response	Insulin	6e-07	40	[27 - 51] % decrease	rs12655917-C	chr5	77327696	A/G	0.969	NonEuro	0.8993	0.943	Yes	-
	904	21901158	Irvin MR	PLoS One	Insulin resistance/response	Insulin	6e-06	15	[8.00 - 22.00] % increase	rs16962638-C	chr13	102984920	A/G	0	NonEuro	0	0	Yes	-
	905	21901158	Irvin MR	PLoS One	Insulin resistance/response	Insulin	1e-06	34	[22.00 - 44.00] % decrease	rs17431357-C	chr12	119364817	C/T	0.938	NonEuro	0.93103	0.886	Yes	-
	906	21901158	Irvin MR	PLoS One	Insulin resistance/response	Insulin	4e-06	45	[24.00 - 69.00] % increase	rs17589516-C	chr6	38144398	A/G	0.053	NonEuro	0.1069	0.097	Yes	-
	907	21901158	Irvin MR	PLoS One	Insulin resistance/response	Insulin	2e-06	15	[9.00 - 23.00] % increase	rs2407103-C	chr8	37071072	A/G	0.085	NonEuro	0.1862	0.091	Yes	-
	908	21901158	Irvin MR	PLoS One	Insulin resistance/response	Insulin	8e-06	9	[5.00 - 12.00] % decrease	rs2407314-C	chr8	4065761	C/G	0.336	NonEuro	0.4536	0.278	Yes	-
	909	21901158	Irvin MR	PLoS One	Insulin resistance/response	Insulin	1e-06	17	[10.00 - 23.00] % decrease	rs4819143-C	chr21	45948606	A/G	0.777	NonEuro	0.855	0.892	Yes	-
	910	21901158	Irvin MR	PLoS One	Insulin resistance/response	Insulin	6e-06	9	[5.00 - 13.00] % increase	rs591044-A	chr22	25027195	C/T	0.558	NonEuro	0.6736	0.824	Yes	-
	911	21901158	Irvin MR	PLoS One	Insulin resistance/response	Insulin	7e-06	13	[7.00 - 20.00] % increase	rs6576507-A	chr15	23839487	C/T	1	NonEuro	1	0	No	Duplicated
	912	21901158	Irvin MR	PLoS One	Insulin resistance/response	Insulin	4e-07	14	[8.00-20.00] % increase	rs6576507-A	chr15	23839487	C/T	1	NonEuro	1	1	Yes	-
	913	21901158	Irvin MR	PLoS One	Insulin resistance/response	Insulin	3e-06	12	[7.00 - 18.00] % increase	rs7043482-G	chr9	84325735	A/C	0.336	NonEuro	0.5104	0.233	Yes	-
	914	21901158	Irvin MR	PLoS One	Insulin resistance/response	Insulin	4e-06	12	[7.00 - 16.00] % decrease	rs9792548-C	chr9	88762903	A/G	0.612	NonEuro	0.5528	0.415	Yes	-
	915	21216879	Kaplan RC	Hum Mol Genet	Insulin-like growth factors	Other	5e-10	NR	NR	rs4234798-T	chr4	7270834	G/T	0.447	0.39	0.3804	0.375	Yes	-
	916	21216879	Kaplan RC	Hum Mol Genet	Insulin-like growth factors	Other	4e-21	NR	NR	rs700752-G	chr7	46720078	C/G	0.673	0.65	0.6448	0.812	Yes	-
	917	21216879	Kaplan RC	Hum Mol Genet	Insulin-like growth factors	Other	5e-09	NR	NR	rs700752-G	chr7	46720078	C/G	0.673	0.65	0.6448	0.812	Yes	-
	918	20150558	He M	Arterioscler Thromb Vasc Biol	Interleukin-18 levels	Other	1e-08	NR	NR	rs1834481-G	chr11	111529037	C/G	0.226	0.24	0.1424	0.114	Yes	-
	919	20150558	He M	Arterioscler Thromb Vasc Biol	Interleukin-18 levels	Other	4e-09	NR	NR	rs2115763-T	chr11	111556379	A/T	0.415	0.33	0.4816	0.619	Yes	-
	920	21787189	Nyberg F	Pharmacogenomics	Interstitial lung disease	Other	4e-06	2.96	[1.80-.5.00]	rs170020-C	chr5	151324751	A/G	0.447	NA	0.5315	0.392	Yes	-
	921	22286173	Low SK	Hum Mol Genet	Intracranial aneurysm	Other	2e-07	1.21	[1.133-1.30]	rs10757272-T	chr9	22078260	C/T	0.46	0.649	0.6232	0.506	Yes	-
	922	20364137	Yasuno K	Nat Genet	Intracranial aneurysm	Other	1e-09	1.29	[1.19-1.40]	rs12413409-G	chr10	104709086	A/G	0.925	0.91	0.75	0.722	Yes	-
	923	20364137	Yasuno K	Nat Genet	Intracranial aneurysm	Other	1e-12	1.28	[1.20-1.38]	rs9298506-A	chr8	55600077	A/G	0.795	0.81	0.8406	0.761	Yes	-
	924	18997786	Bilguvar K	Nat Genet	Intracranial aneurysm	Other	2e-09	1.35	[1.22-1.49]	rs9298506-A	chr8	55600077	A/G	0.795	0.81	0.8406	0.761	Yes	-
	925	20364137	Yasuno K	Nat Genet	Intracranial aneurysm	Other	3e-09	1.2	[1.13-1.28]	rs9315204-T	chr13	32591837	C/T	0.212	0.21	0.331	0.284	Yes	-
	926	21835309	Larsson M	Am J Hum Genet	Iris characteristics	Other	1e-06	0.12	[0.06-0.18] unit decrease	rs205611-A	chr2	74825589	A/G	0.805	NA	0.8913	0.96	Yes	-
	927	18991354	Gretarsdottir S	Ann Neurol	Ischemic stroke	Other	2e-10	1.26	[1.17-1.35]	rs2200733-T	chr4	111929618	C/T	0.115	0.11	0.1007	0.136	Yes	-
	928	21326860	Tsai FJ	PLoS One	Kawasaki disease	Other	7e-06	1.32	[1.116-1.551]	rs10129255-A	chr14	106247258	C/T	0.271	0.34	0.3768	0	Yes	-
	929	21326860	Tsai FJ	PLoS One	Kawasaki disease	Other	7e-06	1.41	[1.191-1.667]	rs1568657-G	chr15	81517183	A/G	0.153	0.52	0.1562	0.131	Yes	-
	930	19132087	Burgner D	PLoS Genet	Kawasaki disease	Other	1e-06	1.43	[1.32-1.53]	rs17531088-T	chr3	176376469	C/T	0.46	0.44	0.3397	0.466	Yes	-
	931	19132087	Burgner D	PLoS Genet	Kawasaki disease	Other	2e-06	1.56	[1.33-1.92]	rs7199343-T	chr16	71566525	A/T	0.314	0.3	0.2621	0.284	Yes	-
	932	21221998	Kim JJ	Hum Genet	Kawasaki disease	Other	2e-06	2.7	[1.77-4.12]	rs7604693-G	chr2	64202706	A/C	0.23	0.05	0.1773	0.17	Yes	-
	933	20711176	Nakashima M	Nat Genet	Keloid	Other	6e-23	1.77	[1.58-1.99]	rs873549-C	chr1	220338390	C/T	0.283	0.28	0.2517	0.432	Yes	-
	934	20864672	Waterworth DM	Arterioscler Thromb Vasc Biol	LDL cholesterol	Other	1e-11	0.05	[0.04-0.06] unit increase	rs10401969-T	chr19	19268718	C/T	0.903	0.91	0.8483	0.886	Yes	-
	935	20686565	Teslovich TM	Nature	LDL cholesterol	Other	7e-22	3.11	[2.37-3.85] mg/dL decrease	rs10401969-C	chr19	19268718	C/T	0.097	0.07	0.1517	0.114	Yes	-
	936	19060906	Kathiresan S	Nat Genet	LDL cholesterol	Other	2e-08	0.05	[-0.03-0.13] s.d. decrease	rs10401969-C	chr19	19268718	C/T	0.097	0.06	0.1517	0.114	Yes	-
	937	19060911	Aulchenko YS	Nat Genet	LDL cholesterol	Other	8e-06	0.06	[NR] s.d. decrease	rs10889353-C	chr1	62890784	A/C	0.336	0.32	0.2641	0.392	Yes	-
	938	20864672	Waterworth DM	Arterioscler Thromb Vasc Biol	LDL cholesterol	Other	1e-10	0.03	[0.02-0.04] unit increase	rs11206510-T	chr1	55268627	C/T	0.836	0.77	0.90345	0.955	Yes	-
	939	19060906	Kathiresan S	Nat Genet	LDL cholesterol	Other	4e-08	0.09	[0.05-0.13] s.d. decrease	rs11206510-C	chr1	55268627	C/T	0.164	0.19	0.09655	0.045	Yes	-
	940	18193043	Willer CJ	Nat Genet	LDL cholesterol	Other	4e-11	3.04	[NR] mg/dl higher	rs11206510-T	chr1	55268627	C/T	0.836	0.81	0.90345	0.955	Yes	-
	941	18193044	Kathiresan S	Nat Genet	LDL cholesterol	Other	1e-20	0.1	[0.08-0.12] % SD higher	rs12654264-T	chr5	74684359	A/T	0.398	0.39	0.4103	0.642	Yes	-
	942	19060906	Kathiresan S	Nat Genet	LDL cholesterol	Other	1e-11	0.07	[0.03-0.11] s.d. decrease	rs1501908-G	chr5	156330747	C/G	0.296	0.37	0.331	0.369	Yes	-
	943	20686565	Teslovich TM	Nature	LDL cholesterol	Other	2e-17	1.95	[1.48-2.42] mg/dL increase	rs1564348-C	chr6	160498850	C/T	0.17	0.17	0.06597	0.091	Yes	-
	944	18193044	Kathiresan S	Nat Genet	LDL cholesterol	Other	3e-08	0.1	[0.06-0.14] % SD lower	rs16996148-T	chr19	19519472	G/T	0.095	0.1	0.1314	0.097	Yes	-
	945	18193043	Willer CJ	Nat Genet	LDL cholesterol	Other	3e-09	3.32	[NR] mg/dl higher	rs16996148-G	chr19	19519472	G/T	0.905	0.92	0.8686	0.903	Yes	-
	946	19060911	Aulchenko YS	Nat Genet	LDL cholesterol	Other	4e-13	0.11	[NR] s.d. increase	rs174570-G	chr11	61353788	C/T	0.866	0.83	0.8993	0.972	Yes	-
	947	20686565	Teslovich TM	Nature	LDL cholesterol	Other	2e-28	2.01	[1.58-2.44] mg/dL increase	rs2479409-G	chr1	55277238	A/G	0.35	0.3	0.3403	0.295	Yes	-
	948	20686565	Teslovich TM	Nature	LDL cholesterol	Other	6e-11	1.09	[0.7-1.48] mg/dL decrease	rs2642442-T	chr1	219040186	C/T	0.705	0.32	0.7847	0.699	Yes	-
	949	19060906	Kathiresan S	Nat Genet	LDL cholesterol	Other	2e-08	0.07	[0.03-0.11] s.d. increase	rs2650000-A	chr12	119873345	A/C	0.363	0.36	0.3556	0.42	Yes	-
	950	19060911	Aulchenko YS	Nat Genet	LDL cholesterol	Other	2e-11	0.08	[NR] s.d. increase	rs3846662-G	chr5	74686840	A/G	0.425	0.44	0.4577	0.653	Yes	-
	951	19060906	Kathiresan S	Nat Genet	LDL cholesterol	Other	8e-12	0.07	[0.03-0.11] s.d. increase	rs3846663-T	chr5	74691482	C/T	0.394	0.38	0.4	0.591	Yes	-
	952	20864672	Waterworth DM	Arterioscler Thromb Vasc Biol	LDL cholesterol	Other	2e-40	0.06	[0.05-0.07] unit increase	rs4420638-G	chr19	50114786	A/G	0.183	0.18	0.2345	0.057	Yes	-
	953	20686565	Teslovich TM	Nature	LDL cholesterol	Other	9e-147	7.14	[6.57-7.71] mg/dL increase	rs4420638-G	chr19	50114786	A/G	0.183	0.17	0.2345	0.057	Yes	-
	954	19060906	Kathiresan S	Nat Genet	LDL cholesterol	Other	4e-27	0.29	[0.17-0.41] s.d. increase	rs4420638-G	chr19	50114786	A/G	0.183	0.16	0.2345	0.057	Yes	-
	955	18262040	Sandhu MS	Lancet	LDL cholesterol	Other	1e-20	0.06	[0.04-0.08] mmol/L increase	rs4420638-G	chr19	50114786	A/G	0.183	0.18	0.2345	0.057	Yes	-
	956	18193044	Kathiresan S	Nat Genet	LDL cholesterol	Other	1e-60	0.19	[0.15-0.23] % SD higher	rs4420638-G	chr19	50114786	A/G	0.183	0.2	0.2345	0.057	Yes	-
	957	18193043	Willer CJ	Nat Genet	LDL cholesterol	Other	3e-43	6.61	[NR] mg/dl higher	rs4420638-G	chr19	50114786	A/G	0.183	0.18	0.2345	0.057	Yes	-
	958	19060910	Sabatti C	Nat Genet	LDL cholesterol	Other	2e-07	0.1	[0.06-0.14] mmol/l increase	rs4844614-A	chr1	205941798	G/T	0.243	0.32	0.269	0.352	Yes	-
	959	18262040	Sandhu MS	Lancet	LDL cholesterol	Other	1e-09	0.04	[0.02-0.06] mmol/L decrease	rs562338-T	chr2	21141826	A/G	0.221	0.2	0.1287	0.136	Yes	-
	960	18193043	Willer CJ	Nat Genet	LDL cholesterol	Other	6e-22	4.89	[NR] mg/dl higher	rs562338-G	chr2	21141826	A/G	0.779	0.82	0.8713	0.864	Yes	-
	961	18262040	Sandhu MS	Lancet	LDL cholesterol	Other	1e-33	0.16	[0.14-0.18] mmol/L decrease	rs599839-G	chr1	109623689	A/G	0.279	0.19	0.1573	0.25	Yes	-
	962	18193043	Willer CJ	Nat Genet	LDL cholesterol	Other	6e-33	5.48	[NR] mg/dl higher	rs599839-A	chr1	109623689	A/G	0.721	0.77	0.8427	0.75	Yes	-
	963	18179892	Wallace C	Am J Hum Genet	LDL cholesterol	Other	1e-07	0.95	[0.93-0.97]	rs599839-G	chr1	109623689	A/G	0.279	0.24	0.1573	0.25	Yes	-
	964	19060906	Kathiresan S	Nat Genet	LDL cholesterol	Other	4e-09	0.06	[0.03-0.10] s.d. decrease	rs6102059-T	chr20	38662198	C/T	0.283	0.32	0.1241	0.386	Yes	-
	965	20686565	Teslovich TM	Nature	LDL cholesterol	Other	1e-170	5.65	[5.24-6.06] mg/dL decrease	rs629301-G	chr1	109619829	G/T	0.261	0.22	0.1655	0.25	Yes	-
	966	18179892	Wallace C	Am J Hum Genet	LDL cholesterol	Other	3e-11	NR	NR	rs6589566-G	chr11	116157633	A/G	0.071	0.06	0.08966	0.142	Yes	-
	967	19060911	Aulchenko YS	Nat Genet	LDL cholesterol	Other	4e-17	0.1	[NR] s.d. decrease	rs693-G	chr2	21085700	A/G	0.509	0.52	0.5638	0.767	Yes	-
	968	19060910	Sabatti C	Nat Genet	LDL cholesterol	Other	3e-11	0.12	[0.09-0.16] mmol/l increase	rs693-A	chr2	21085700	A/G	0.491	0.41	0.4362	0.233	Yes	-
	969	18193044	Kathiresan S	Nat Genet	LDL cholesterol	Other	1e-21	0.12	[0.10-0.14] % SD higher	rs693-A	chr2	21085700	A/G	0.491	0.48	0.4362	0.233	Yes	-
	970	20686565	Teslovich TM	Nature	LDL cholesterol	Other	4e-09	0.87	[0.52-1.22] mg/dL decrease	rs7206971-T	chr17	42780114	A/G	0.475	0.35	0.4722	0	Yes	-
	971	18802019	Burkhardt R	Arterioscler Thromb Vasc Biol	LDL cholesterol	Other	1e-08	18	[NR] % s.d. increase	rs7703051-A	chr5	74661243	A/C	0.398	0.41	0.4097	0.648	Yes	-
	972	18179892	Wallace C	Am J Hum Genet	LDL cholesterol	Other	5e-07	NR	NR	rs780094-T	chr2	27594741	C/T	0.394	0.39	0.4893	0.188	Yes	-
	973	20686565	Teslovich TM	Nature	LDL cholesterol	Other	1e-26	2.85	[2.32-3.38] mg/dL increase	rs964184-G	chr11	116154127	C/G	0.121	0.13	0.1771	0.176	Yes	-
	974	22019778	Zhang F	Nat Genet	Leprosy	Other	4e-14	1.3	[1.21-1.39]	rs2275606-A	chr6	146960643	A/G	0.058	0.21	0.2447	0.114	Yes	-
	975	22019778	Zhang F	Nat Genet	Leprosy	Other	3e-11	1.45	[1.30-1.61]	rs3762318-A	chr1	67369707	A/G	0.805	0.1	0.8241	0.932	Yes	-
	976	20018961	Zhang FR	N Engl J Med	Leprosy	Other	4e-54	1.68	[1.57-1.80]	rs3764147-G	chr13	43355925	A/G	0.243	0.31	0.2793	0.369	Yes	-
	977	20018961	Zhang FR	N Engl J Med	Leprosy	Other	1e-12	1.3	[1.20-1.39]	rs40457-A	chr8	90892832	A/G	0.456	0.28	0.4266	0.693	Yes	-
	978	20018961	Zhang FR	N Engl J Med	Leprosy	Other	3e-21	1.37	[1.28-1.46]	rs6478108-A	chr9	116598524	C/T	0.624	0.46	0.7674	0.75	Yes	-
	979	20442857	Suchindran S	PLoS Genet	Lipoprotein-associated phospholipase A2 activity and mass	Other	1e-08	4.6	[NR] nmol/ml/min increase	rs10846744-C	chr12	123878378	C/G	0.15	0.15	0.227	0.233	Yes	-
	980	20442857	Suchindran S	PLoS Genet	Lipoprotein-associated phospholipase A2 activity and mass	Other	4e-08	6.4	[NR] nmol/ml/min increase	rs12286037-T	chr11	116157417	C/T	0.04	0.07	0.08681	0.028	Yes	-
	981	22003152	Grallert H	Eur Heart J	Lipoprotein-associated phospholipase A2 activity and mass	Other	2e-23	0.04	[0.035-0.051] unit increase	rs1805017-T	chr6	46792181	C/T	0.212	0.26	0.4201	0.534	Yes	-
	982	20442857	Suchindran S	PLoS Genet	Lipoprotein-associated phospholipase A2 activity and mass	Other	6e-14	11.1	[NR] ng/mL increase	rs1805017-T	chr6	46792181	C/T	0.212	0.26	0.4201	0.534	Yes	-
	983	22003152	Grallert H	Eur Heart J	Lipoprotein-associated phospholipase A2 activity and mass	Other	5e-30	0.05	[0.044-0.064] unit decrease	rs4420638-A	chr19	50114786	A/G	0.817	0.84	0.7655	0.943	Yes	-
	984	20442857	Suchindran S	PLoS Genet	Lipoprotein-associated phospholipase A2 activity and mass	Other	6e-24	8	[NR] nmol/ml/min increase	rs4420638-G	chr19	50114786	A/G	0.183	0.16	0.2345	0.057	Yes	-
	985	20442857	Suchindran S	PLoS Genet	Lipoprotein-associated phospholipase A2 activity and mass	Other	3e-15	5.5	[NR] nmol/ml/min decrease	rs599839-G	chr1	109623689	A/G	0.279	0.22	0.1573	0.25	Yes	-
	986	22003152	Grallert H	Eur Heart J	Lipoprotein-associated phospholipase A2 activity and mass	Other	8e-11	0.03	[0.022-0.042] unit decrease	rs964184-C	chr11	116154127	C/G	0.879	0.86	0.8229	0.824	Yes	-
	987	18940312	Yuan X	Am J Hum Genet	Liver enzyme levels	Other	7e-10	0.03	[0.017-0.033] U/L increase	rs10761779-G	chr10	64944933	A/G	0.456	0.49	0.4236	0.548	Yes	-
	988	18940312	Yuan X	Am J Hum Genet	Liver enzyme levels	Other	2e-08	0.04	[0.025-0.053] U/L decrease	rs11597390-A	chr10	101851425	A/G	0.325	0.36	0.295	0.116	Yes	-
	989	18940312	Yuan X	Am J Hum Genet	Liver enzyme levels	Other	2e-10	0.01	[0.003-0.007] U/L decrease	rs1169313-C	chr12	119927053	C/T	0.381	0.38	0.489	0.466	Yes	-
	990	18940312	Yuan X	Am J Hum Genet	Liver enzyme levels	Other	5e-10	0.03	[0.017-0.033] U/L increase	rs12355784-A	chr10	64791571	A/C	0.456	0.48	0.4266	0.523	Yes	-
	991	18940312	Yuan X	Am J Hum Genet	Liver enzyme levels	Other	7e-15	0.03	[0.023-0.039] U/L increase	rs1780324-T	chr1	21694344	A/G	0.509	0.43	0.4161	0.58	Yes	-
	992	18940312	Yuan X	Am J Hum Genet	Liver enzyme levels	Other	8e-16	0.06	[0.046-0.074] U/L increase	rs2281135-T	chr22	42663903	A/G	0.19	0.18	0.1806	0.335	Yes	-
	993	18940312	Yuan X	Am J Hum Genet	Liver enzyme levels	Other	4e-11	0.01	[0.005-0.009] U/L increase	rs4820599-G	chr22	23320213	A/G	0.27	0.31	0.2604	0.199	Yes	-
	994	18940312	Yuan X	Am J Hum Genet	Liver enzyme levels	Other	8e-21	0.06	[0.048-0.072] U/L decrease	rs4962153-A	chr9	135313575	A/G	0.156	NA	0.1632	0.091	Yes	-
	995	18940312	Yuan X	Am J Hum Genet	Liver enzyme levels	Other	2e-30	0.05	[0.039-0.055] U/L decrease	rs657152-T	chr9	135129086	A/C	0.376	0.39	0.4896	0.432	Yes	-
	996	18940312	Yuan X	Am J Hum Genet	Liver enzyme levels	Other	1e-11	0.03	[0.024-0.044] U/L increase	rs9467160-A	chr6	24549725	A/G	0.243	0.24	0.2812	0.176	Yes	-
	997	18940312	Yuan X	Am J Hum Genet	Liver enzyme levels	Other	4e-06	0.03	[0.018-0.042] U/L decrease	rs9803659-C	chr1	165423124	C/T	0.354	NA	0.4201	0.142	Yes	-
	998	22001757	Chambers JC	Nat Genet	Liver enzyme levels (alkaline phosphatase)	Other	6e-26	3.1	[2.50-3.70] % increase	rs1883415-C	chr6	24599454	A/C	0.345	0.33	0.2695	0.244	Yes	-
	999	22001757	Chambers JC	Nat Genet	Liver enzyme levels (alkaline phosphatase)	Other	8e-12	2.1	[1.50-2.80] % increase	rs314253-C	chr17	7032374	C/T	0.354	0.33	0.2414	0.278	Yes	-
	1000	22001757	Chambers JC	Nat Genet	Liver enzyme levels (alkaline phosphatase)	Other	7e-10	1.5	[0.90-2.0] % increase	rs7267979-G	chr20	25246087	A/G	0.562	0.57	0.5069	0.529	Yes	-
	1001	22001757	Chambers JC	Nat Genet	Liver enzyme levels (gamma-glutamyl transferase)	Other	6e-11	4.9	[4.00-5.70] % increase	rs10513686-A	chr3	172208236	A/G	0.142	0.14	0.08519	0	Yes	-
	1002	22001757	Chambers JC	Nat Genet	Liver enzyme levels (gamma-glutamyl transferase)	Other	3e-10	5.5	[3.30-7.70] % increase	rs4074793-G	chr5	52228882	A/G	0.088	0.07	0.02431	0.068	Yes	-
	1003	22001757	Chambers JC	Nat Genet	Liver enzyme levels (gamma-glutamyl transferase)	Other	3e-09	3.2	[2.50-3.90] % increase	rs4581712-A	chr16	79055102	A/C	0.274	0.27	0.3077	0.29	Yes	-
	1004	22001757	Chambers JC	Nat Genet	Liver enzyme levels (gamma-glutamyl transferase)	Other	6e-10	3.5	[2.20-4.80] % increase	rs754466-T	chr10	79350440	A/T	0.261	0.24	0.2353	0.362	Yes	-
	1005	22001757	Chambers JC	Nat Genet	Liver enzyme levels (gamma-glutamyl transferase)	Other	1e-09	2.4	[1.80-3.00] % increase	rs8038465-T	chr15	71765390	C/T	0.473	0.39	0.2641	0.239	Yes	-
	1006	22001757	Chambers JC	Nat Genet	Liver enzyme levels (gamma-glutamyl transferase)	Other	3e-09	3	[2.10-4.00] % increase	rs9296736-T	chr6	54032656	C/T	0.299	0.31	0.4172	0.426	Yes	-
	1007	22001757	Chambers JC	Nat Genet	Liver enzyme levels (gamma-glutamyl transferase)	Other	1e-09	2.4	[1.80-3.00] % increase	rs9913711-C	chr17	67609756	C/G	0.65	0.65	0.4432	0.649	Yes	-
	1008	21612516	Malovini A	Rejuvenation Res	Longevity	Other	2e-06	1.82	[1.43-2.33]	rs10491334-C	chr5	110800303	C/T	0.788	0.82	0.8931	0.943	Yes	-
	1009	20304771	Newman AB	J Gerontol A Biol Sci Med Sci	Longevity	Other	7e-07	1.22	[NR]	rs9664222-C	chr10	89328613	A/C	0.761	0.79	0.8107	0.874	Yes	-
	1010	21900290	Qi Q	Eur Heart J	Lp (a) levels	Other	5e-08	0.5	[0.32-0.68] decrease mg/dL	rs12214416-A	chr6	160830507	A/T	0.044	0.04	0.1049	0.057	Yes	-
	1011	21900290	Qi Q	Eur Heart J	Lp (a) levels	Other	4e-09	0.32	[0.22-0.42] mg/dL increase	rs3120139-A	chr6	160661612	A/G	0.168	0.13	0.03793	0.062	Yes	-
	1012	21900290	Qi Q	Eur Heart J	Lp (a) levels	Other	3e-17	0.3	[0.22-0.38] mg/dL decrease	rs783147-A	chr6	161057980	A/G	0.434	0.45	0.3063	0.432	Yes	-
	1013	20871597	Miki D	Nat Genet	Lung adenocarcinoma	Other	3e-11	1.27	[1.19-1.37]	rs2736100-C	chr5	1339516	A/C	0.527	0.39	0.5603	0.645	Yes	-
	1014	20700438	Hsiung CA	PLoS Genet	Lung adenocarcinoma	Other	2e-22	1.46	[1.35-1.57]	rs2736100-G	chr5	1339516	A/C	0.527	0.39	0.5603	0.645	Yes	-
	1015	19836008	Landi MT	Am J Hum Genet	Lung adenocarcinoma	Other	2e-10	1.12	[1.08-1.16]	rs2736100-G	chr5	1339516	A/C	0.527	0.5	0.5603	0.645	Yes	-
	1016	20304703	Li Y	Lancet Oncol	Lung cancer	Other	6e-06	1.46	[1.26-1.70]	rs2352028-A	chr13	91243230	C/T	0.239	0.26	0.2812	0.108	Yes	-
	1017	21725308	Hu Z	Nat Genet	Lung cancer	Other	1e-27	1.27	[1.22-1.33]	rs2736100-C	chr5	1339516	A/C	0.527	0.41	0.5603	0.645	Yes	-
	1018	21725308	Hu Z	Nat Genet	Lung cancer	Other	6e-13	1.29	[1.20-1.38]	rs36600-A	chr22	28667586	C/T	0.252	0.09	0.3576	0.287	Yes	-
	1019	18978787	Wang Y	Nat Genet	Lung cancer	Other	8e-09	1.15	[1.09-1.19]	rs401681-G	chr5	1375087	C/T	0.566	NA	0.7007	0.79	Yes	-
	1020	21725308	Hu Z	Nat Genet	Lung cancer	Other	7e-26	1.26	[1.21-1.32]	rs4488809-C	chr3	190838955	C/T	0.491	0.47	0.3621	0.364	Yes	-
	1021	18385676	Amos CI	Nat Genet	Lung cancer	Other	8e-06	1.16	[1.05-1.28]	rs7626795-G	chr3	191833155	A/G	0.106	NA	0.2092	0.261	Yes	-
	1022	21042317	Wray NR	Mol Psychiatry	Major depressive disorder	Other	1e-06	1.22	[NR]	rs12446956-C	chr16	72059037	C/T	0.084	0.13	0.1103	0.341	Yes	-
	1023	20125088	Shi J	Mol Psychiatry	Major depressive disorder	Other	4e-07	1.35		rs2828520-G	chr21	24064990	A/G	0.31	0.31	0.5	0.295	Yes	-
	1024	20125088	Shi J	Mol Psychiatry	Major depressive disorder	Other	2e-06	1.34		rs882632-T	chr2	29134265	C/T	0.31	0.29	0.2465	0.08	Yes	-
	1025	20038947	Shyn SI	Mol Psychiatry	Major depressive disorder (broad)	Other	1e-06	1.19	[NR]	rs9870680-T	chr3	7504555	C/T	0.465	0.44	0.3732	0.392	Yes	-
	1026	19465909	Jallow M	Nat Genet	Malaria	Other	7e-07	1.21	[1.12-1.31]	rs6503319-T	chr17	10514884	C/T	0.35	0.45	0.4124	0.267	Yes	-
	1027	18849991	Richards JB	Nat Genet	Male-pattern baldness	Other	1e-14	1.6	[1.42-1.80] (males)	rs1160312-A	chr20	21998503	A/G	0.549	0.43	0.2778	0.42	Yes	-
	1028	18849994	Hillmer AM	Nat Genet	Male-pattern baldness	Other	3e-15	1.82	[1.45-2.30]	rs2180439-C	chr20	21801100	C/T	0.42	0.43	0.5979	0.568	Yes	-
	1029	19862010	Ganesh SK	Nat Genet	Mean corpuscular hemoglobin	Other	2e-14	0	[0.004-0.006] pg decrease	rs10758658-A	chr9	4846877	A/G	0.235	NA	0.1448	0.261	Yes	-
	1030	19862010	Ganesh SK	Nat Genet	Mean corpuscular hemoglobin	Other	3e-10	0	[0.003-0.006] pg increase	rs1122794-A	chr16	249156	A/C	0.176	NA	0.1028	0.307	Yes	-
	1031	19862010	Ganesh SK	Nat Genet	Mean corpuscular hemoglobin	Other	9e-34	0.01	[0.0005-0.007] pg decrease	rs2413450-T	chr22	35800170	C/T	0.478	NA	0.5625	0.636	Yes	-
	1032	19862010	Ganesh SK	Nat Genet	Mean corpuscular hemoglobin	Other	1e-17	0	[0.003-0.005] pg decrease	rs628751-C	chr6	139880112	A/C	0.5	NA	0.4529	0.379	Yes	-
	1033	19862010	Ganesh SK	Nat Genet	Mean corpuscular volume	Other	3e-20	0	[0.003-0.005] fl decrease	rs10758658-A	chr9	4846877	A/G	0.235	NA	0.1448	0.261	Yes	-
	1034	19862010	Ganesh SK	Nat Genet	Mean corpuscular volume	Other	1e-10	0	[0.002-0.003] fl decrease	rs11239550-G	chr10	45344735	A/G	0.288	NA	0.2069	0.256	Yes	-
	1035	19862010	Ganesh SK	Nat Genet	Mean corpuscular volume	Other	3e-41	0.01	[0.004-0.006] fl decrease	rs2413450-T	chr22	35800170	C/T	0.478	NA	0.5625	0.636	Yes	-
	1036	19862010	Ganesh SK	Nat Genet	Mean corpuscular volume	Other	7e-86	0.01	[0.007-0.009] fl decrease	rs4895441-G	chr6	135468266	A/G	0.23	NA	0.2586	0.131	Yes	-
	1037	19862010	Ganesh SK	Nat Genet	Mean corpuscular volume	Other	4e-10	0	[0.002-0.003] fl decrease	rs9374080-C	chr6	109723113	C/T	0.416	NA	0.2902	0.17	Yes	-
	1038	22139419	Gieger C	Nature	Mean platelet volume	Other	2e-14	0.01	[0.0060-0.0100] ln(fl) increase	rs10876550-G	chr12	52998575	A/G	0.429	NA	0.4172	0.256	Yes	-
	1039	22139419	Gieger C	Nature	Mean platelet volume	Other	1e-11	0.01	[0.0071-0.0149] ln(fl) increase	rs11734132-G	chr4	6942420	C/G	0.841	NA	0.8796	0.833	Yes	-
	1040	19820697	Soranzo N	Nat Genet	Mean platelet volume	Other	6e-31	0.02	[0.013-0.017] fl increase	rs12485738-A	chr3	56840816	A/G	0.394	NA	0.4097	0.448	Yes	-
	1041	19110211	Meisinger C	Am J Hum Genet	Mean platelet volume	Other	4e-27	0.02	[0.01-0.02] per log fl increase	rs12485738-A	chr3	56840816	A/G	0.394	0.3	0.4097	0.448	Yes	-
	1042	22139419	Gieger C	Nature	Mean platelet volume	Other	2e-15	0.01	[0.008-0.012] ln(fl) increase	rs17655730-T	chr11	260715	C/T	0.721	NA	0.94326	0	Yes	-
	1043	19820697	Soranzo N	Nat Genet	Mean platelet volume	Other	1e-22	0.02	[0.012-0.020] fl increase	rs2138852-T	chr17	24727475	C/T	0.558	NA	0.5517	0.631	Yes	-
	1044	19110211	Meisinger C	Am J Hum Genet	Mean platelet volume	Other	7e-28	0.02	[0.01-0.02] per log fl decrease	rs2138852-C	chr17	24727475	C/T	0.442	0.47	0.4483	0.369	Yes	-
	1045	22139419	Gieger C	Nature	Mean platelet volume	Other	7e-14	0.01	[0.006-0.01] ln(fl) increase	rs2950390-C	chr12	55341558	C/T	0.673	NA	0.725	0.801	Yes	-
	1046	22139419	Gieger C	Nature	Mean platelet volume	Other	8e-12	0.01	[0.004-0.008] ln(fl) increase	rs7317038-C	chr13	113060899	C/T	0.594	NA	0.6632	0.636	Yes	-
	1047	19820697	Soranzo N	Nat Genet	Mean platelet volume	Other	3e-44	0.03	[0.027-0.035] fl increase	rs7961894-T	chr12	120849966	C/T	0.107	NA	0.03793	0.017	Yes	-
	1048	19110211	Meisinger C	Am J Hum Genet	Mean platelet volume	Other	7e-48	0.03	[0.03-0.04] per log fl increase	rs7961894-A	chr12	120849966	C/T	0.107	0.11	0.03793	0.017	Yes	-
	1049	21983787	Barrett JH	Nat Genet	Melanoma	Other	9e-10	1.14	[1.09-1.19]	rs13016963-A	chr2	201871056	A/G	0.416	0.37	0.2634	0.159	Yes	-
	1050	21983787	Barrett JH	Nat Genet	Melanoma	Other	2e-13	1.3	[1.21-1.39]	rs1393350-A	chr11	88650694	A/G	0.226	0.28	0.1581	0.114	Yes	-
	1051	19578364	Bishop DT	Nat Genet	Melanoma	Other	2e-14	1.29	[1.21-1.38]	rs1393350-A	chr11	88650694	A/G	0.226	0.27	0.1581	0.114	Yes	-
	1052	21983787	Barrett JH	Nat Genet	Melanoma	Other	3e-27	1.7	[1.54-1.87]	rs258322-A	chr16	88283404	A/G	0.137	0.11	0.04483	0.091	Yes	-
	1053	19578364	Bishop DT	Nat Genet	Melanoma	Other	3e-27	1.67	[1.52-1.83]	rs258322-A	chr16	88283404	A/G	0.137	0.09	0.04483	0.091	Yes	-
	1054	21983785	Macgregor S	Nat Genet	Melanoma	Other	9e-08	1.15	[NR]	rs3219090-C	chr1	224631314	C/T	0.637	0.67	0.7069	0.58	Yes	-
	1055	21983787	Barrett JH	Nat Genet	Melanoma	Other	3e-08	1.2	[1.12-1.28]	rs401681-A	chr5	1375087	C/T	0.434	0.46	0.2993	0.21	Yes	-
	1056	19578364	Bishop DT	Nat Genet	Melanoma	Other	6e-22	1.36	[1.28-1.45]	rs4785763-A	chr16	88594437	A/C	0.376	0.32	0.2569	0.305	Yes	-
	1057	18488026	Brown KM	Nat Genet	Melanoma	Other	1e-15	1.75	[1.53-2.01]	rs910873-T	chr20	32635433	A/G	0.084	0.09	0.01034	0.011	Yes	-
	1058	21102462	Elks CE	Nat Genet	Menarche (age at onset)	Other	6e-14	3.9	[2.92-4.88] week increase	rs1079866-G	chr7	41436618	C/G	0.124	0.15	0.1966	0.091	Yes	-
	1059	21102462	Elks CE	Nat Genet	Menarche (age at onset)	Other	8e-09	3.1	[2.12-4.08] week increase	rs10899489-A	chr11	77773021	A/C	0.124	0.15	0.2882	0.307	Yes	-
	1060	21102462	Elks CE	Nat Genet	Menarche (age at onset)	Other	6e-08	3.7	[2.33-5.07] week decrease	rs16938437-T	chr11	46009151	C/T	0.08	0.09	0.1379	0.102	Yes	-
	1061	21102462	Elks CE	Nat Genet	Menarche (age at onset)	Other	1e-10	3.2	[2.22-4.18] week increase	rs17268785-G	chr2	56445587	A/G	0.186	0.17	0.1483	0.176	Yes	-
	1062	21102462	Elks CE	Nat Genet	Menarche (age at onset)	Other	1e-07	2.3	[1.52-3.08] week increase	rs2687729-G	chr3	129377916	A/G	0.217	0.27	0.2943	0.415	Yes	-
	1063	21102462	Elks CE	Nat Genet	Menarche (age at onset)	Other	2e-08	2.8	[1.82-3.78] week increase	rs2947411-A	chr2	604168	A/G	0.15	0.17	0.1324	0.21	Yes	-
	1064	21102462	Elks CE	Nat Genet	Menarche (age at onset)	Other	8e-07	2	[1.22-2.78] week decrease	rs3743266-C	chr15	58568805	C/T	0.354	0.32	0.1783	0.195	Yes	-
	1065	21102462	Elks CE	Nat Genet	Menarche (age at onset)	Other	1e-13	4.2	[3.02-5.38] week decrease	rs466639-T	chr1	163661506	C/T	0.128	0.13	0.2345	0.205	Yes	-
	1066	21102462	Elks CE	Nat Genet	Menarche (age at onset)	Other	1e-08	2.3	[1.52-3.08] week increase	rs4929923-T	chr11	8595776	C/T	0.332	0.36	0.5207	0.523	Yes	-
	1067	21102462	Elks CE	Nat Genet	Menarche (age at onset)	Other	2e-12	2.7	[1.92-3.48] week decrease	rs6589964-A	chr11	122375893	A/C	0.482	0.48	0.5276	0.545	Yes	-
	1068	21102462	Elks CE	Nat Genet	Menarche (age at onset)	Other	5e-08	2.4	[1.62-3.18] week decrease	rs757647-A	chr5	137735214	A/G	0.208	0.22	0.3172	0.244	Yes	-
	1069	21102462	Elks CE	Nat Genet	Menarche (age at onset)	Other	3e-08	2.4	[1.62-3.18] week decrease	rs7617480-A	chr3	49185736	A/C	0.248	0.22	0.2338	0.029	Yes	-
	1070	21102462	Elks CE	Nat Genet	Menarche (age at onset)	Other	3e-08	2.1	[1.32-2.88] week decrease	rs852069-A	chr20	17070593	A/G	0.381	0.37	0.5379	0.609	Yes	-
	1071	21102462	Elks CE	Nat Genet	Menarche (age at onset)	Other	3e-08	2.1	[1.32-2.88] week decrease	rs9939609-A	chr16	52378028	A/T	0.46	0.4	0.412	0.267	Yes	-
	1072	19448621	He C	Nat Genet	Menarche and menopause (age at onset)	Other	1e-21	1.07	[0.85-1.29] years older	rs16991615-A	chr20	5896227	A/G	0.093	0.06	0.1014	0.023	Yes	-
	1073	19448621	He C	Nat Genet	Menarche and menopause (age at onset)	Other	5e-08	0.29	[0.19-0.39] years older	rs2153157-T	chr6	11005474	A/G	0.491	0.49	0.4301	0.364	Yes	-
	1074	22267201	Stolk L	Nat Genet	Menopause (age at onset)	Other	2e-14	0.2	[0.15-0.25] years decrease	rs10183486-T	chr2	171699217	C/T	0.358	0.366	0.1759	0.125	Yes	-
	1075	22267201	Stolk L	Nat Genet	Menopause (age at onset)	Other	2e-16	0.21	[0.16-0.26] years decrease	rs1046089-A	chr6	31710946	A/G	0.301	0.353	0.2029	0.271	Yes	-
	1076	22267201	Stolk L	Nat Genet	Menopause (age at onset)	Other	9e-10	0.16	[0.11-0.21] years decrease	rs12461110-A	chr19	61012475	A/G	0.332	0.356	0.3776	0.307	Yes	-
	1077	22267201	Stolk L	Nat Genet	Menopause (age at onset)	Other	8e-10	0.16	[0.11-0.22] years decrease	rs1635501-C	chr1	240107398	C/T	0.42	0.478	0.4362	0.443	Yes	-
	1078	22267201	Stolk L	Nat Genet	Menopause (age at onset)	Other	1e-73	0.95	[0.85-1.05] years increase	rs16991615-A	chr20	5896227	A/G	0.093	0.069	0.1014	0.023	Yes	-
	1079	22267201	Stolk L	Nat Genet	Menopause (age at onset)	Other	8e-12	0.17	[0.12-0.21] years increase	rs2153157-A	chr6	11005474	A/G	0.491	0.492	0.4301	0.364	Yes	-
	1080	22267201	Stolk L	Nat Genet	Menopause (age at onset)	Other	4e-13	0.18	[0.14-0.23] years decrease	rs2307449-G	chr15	87664932	G/T	0.385	0.405	0.3889	0.392	Yes	-
	1081	19448619	Stolk L	Nat Genet	Menopause (age at onset)	Other	1e-10	0.5	[0.34-0.65] years older	rs236114-A	chr20	5883385	C/T	0.212	0.21	0.2172	0.222	Yes	-
	1082	21386085	Kraja AT	Diabetes	Metabolic syndrome (bivariate traits)	Other	1e-08	0.32	[0.20-0.44] unit decrease	rs12286037-C	chr11	116157417	C/T	0.96	NA	0.91319	0.972	Yes	-
	1083	21386085	Kraja AT	Diabetes	Metabolic syndrome (bivariate traits)	Other	2e-09	0.18	[0.12-0.24] unit increase	rs2197089-C	chr8	19870653	A/G	0.442	NA	0.3819	0.591	Yes	-
	1084	21886157	Suhre K	Nature	Metabolic traits	Other	1e-13	0.09	[NR] unit increase	rs10518693-T	chr15	38487314	C/T	0.354	0.396	0.5862	0.642	Yes	-
	1085	21886157	Suhre K	Nature	Metabolic traits	Other	3e-20	0.13	[NR] unit decrease	rs10799701-A	chr1	21693577	A/G	0.504	0.435	0.4126	0.58	Yes	-
	1086	19060910	Sabatti C	Nat Genet	Metabolic traits	Other	3e-07	0.31	[0.18-0.44] mmol/l decrease	rs11185790-A	chr10	91362513	A/G	0.212	0.21	0.1276	0.172	Yes	-
	1087	21886157	Suhre K	Nature	Metabolic traits	Other	5e-15	0.29	[NR] unit increase	rs12670403-C	chr7	17275804	A/C	0.553	0.487	0.5474	0.619	Yes	-
	1088	21886157	Suhre K	Nature	Metabolic traits	Other	5e-252	0.37	[NR] unit decrease	rs13391552-A	chr2	73672444	A/G	0.248	0.216	0.1979	0.153	Yes	-
	1089	21886157	Suhre K	Nature	Metabolic traits	Other	2e-40	0.26	[NR] unit decrease	rs1495743-G	chr8	18317580	C/G	0.288	0.188	0.1759	0.205	Yes	-
	1090	21886157	Suhre K	Nature	Metabolic traits	Other	9e-40	0.48	[NR] unit decrease	rs17277546-A	chr7	99327507	A/G	0.049	0.045	0.003472	0.011	Yes	-
	1091	21886157	Suhre K	Nature	Metabolic traits	Other	9e-116	0.18	[NR] unit decrease	rs174547-C	chr11	61327359	C/T	0.344	0.32	0.2793	0.098	Yes	-
	1092	21886157	Suhre K	Nature	Metabolic traits	Other	2e-22	0.11	[NR] unit increase	rs2023634-G	chr22	17352450	A/G	0.1	0.091	0.1454	0.006	Yes	-
	1093	21886157	Suhre K	Nature	Metabolic traits	Other	4e-305	0.61	[NR] unit increase	rs2066938-G	chr12	119644998	A/G	0.234	0.252	0.2972	0.188	Yes	-
	1094	21886157	Suhre K	Nature	Metabolic traits	Other	7e-13	0.12	[NR] unit decrease	rs2087160-G	chr4	111554179	G/T	0.204	0.207	0.3414	0.341	Yes	-
	1095	21886157	Suhre K	Nature	Metabolic traits	Other	2e-71	0.16	[NR] unit decrease	rs211718-T	chr1	75879263	C/T	0.31	0.304	0.2676	0.216	Yes	-
	1096	21886157	Suhre K	Nature	Metabolic traits	Other	2e-27	0.12	[NR] unit increase	rs2216405-G	chr2	211325139	A/G	0.181	0.177	0.1667	0.165	Yes	-
	1097	21886157	Suhre K	Nature	Metabolic traits	Other	1e-20	0.11	[NR] unit decrease	rs2403254-T	chr11	18281722	C/T	0.558	0.525	0.3586	0.409	Yes	-
	1098	21886157	Suhre K	Nature	Metabolic traits	Other	7e-13	0.07	[NR] unit decrease	rs2518049-A	chr10	5128036	A/G	0.164	0.175	0.09375	0.176	Yes	-
	1099	19060910	Sabatti C	Nat Genet	Metabolic traits	Other	3e-11	0.4	[0.25-0.55] mmol/l decrease	rs2650000-A	chr12	119873345	A/C	0.363	0.45	0.3556	0.42	Yes	-
	1100	21886157	Suhre K	Nature	Metabolic traits	Other	7e-27	0.09	[NR] unit decrease	rs2652822-C	chr15	61209825	C/T	0.545	0.467	0.4239	0.253	Yes	-
	1101	21886157	Suhre K	Nature	Metabolic traits	Other	3e-17	0.04	[NR] unit decrease	rs2657879-G	chr12	55151605	A/G	0.186	0.187	0.1931	0.182	Yes	-
	1102	21886157	Suhre K	Nature	Metabolic traits	Other	7e-16	0.08	[NR] unit increase	rs272889-A	chr5	131693277	A/G	0.376	0.37	0.5282	0.648	Yes	-
	1103	19060910	Sabatti C	Nat Genet	Metabolic traits	Other	3e-22	0.47	[0.32-0.62] mmol/l decrease	rs2794520-A	chr1	157945440	C/T	0.341	0.36	0.2553	0.386	Yes	-
	1104	21886157	Suhre K	Nature	Metabolic traits	Other	3e-22	0.21	[NR] unit decrease	rs4149081-A	chr12	21269288	A/G	0.164	0.205	0.1739	0.057	Yes	-
	1105	21886157	Suhre K	Nature	Metabolic traits	Other	7e-18	0.24	[NR] unit decrease	rs4253252-T	chr4	187394452	G/T	0.5	0.492	0.5282	0.602	Yes	-
	1106	21886157	Suhre K	Nature	Metabolic traits	Other	8e-20	0.13	[NR] unit decrease	rs4329-G	chr17	58917190	A/G	0.5	0.465	0.3931	0.619	Yes	-
	1107	21886157	Suhre K	Nature	Metabolic traits	Other	6e-34	0.07	[NR] unit decrease	rs4481233-T	chr4	9565177	C/T	0.181	0.193	0.1493	0.131	Yes	-
	1108	21886157	Suhre K	Nature	Metabolic traits	Other	3e-14	0.05	[NR] unit decrease	rs477992-A	chr1	120059099	A/G	0.336	0.313	0.2759	0.17	Yes	-
	1109	21886157	Suhre K	Nature	Metabolic traits	Other	7e-13	0.3	[NR] unit increase	rs494562-G	chr6	86173848	A/G	0.075	0.106	0.05517	0.119	Yes	-
	1110	21886157	Suhre K	Nature	Metabolic traits	Other	4e-20	0.13	[NR] unit increase	rs503279-C	chr19	53900822	C/T	0.571	0.464	0.4118	0.233	Yes	-
	1111	19060910	Sabatti C	Nat Genet	Metabolic traits	Other	6e-10	0.06	[0.04-0.07] mmol/l decrease	rs560887-A	chr2	169471394	C/T	0.326	0.31	0.2235	0.165	Yes	-
	1112	21886157	Suhre K	Nature	Metabolic traits	Other	3e-57	0.12	[NR] unit increase	rs603424-A	chr10	102065469	A/G	0.199	0.189	0.3322	0.5	Yes	-
	1113	21886157	Suhre K	Nature	Metabolic traits	Other	9e-40	0.2	[NR] unit increase	rs612169-G	chr9	135133263	A/G	0.367	0.335	0.451	0.402	Yes	-
	1114	21886157	Suhre K	Nature	Metabolic traits	Other	1e-18	0.11	[NR] unit increase	rs6499165-A	chr16	66883701	A/C	0.283	0.266	0.2374	0.352	Yes	-
	1115	21886157	Suhre K	Nature	Metabolic traits	Other	2e-59	0.12	[NR] unit decrease	rs6558295-G	chr8	145211510	C/G	0.075	0.083	0.125	0.029	Yes	-
	1116	21886157	Suhre K	Nature	Metabolic traits	Other	7e-25	0.16	[NR] unit decrease	rs662138-G	chr6	160484466	C/G	0.199	0.163	0.06738	0.125	Yes	-
	1117	19060910	Sabatti C	Nat Genet	Metabolic traits	Hypertriglyceridemia	2e-08	0.08	[0.05-0.11] mmol/l decrease	rs673548-A	chr2	21091049	A/G	0.205	0.27	0.2951	0.523	Yes	-
	1118	21886157	Suhre K	Nature	Metabolic traits	Other	3e-14	0.05	[NR] unit decrease	rs7094971-G	chr10	61119570	A/G	0.159	0.147	0.1207	0.109	Yes	-
	1119	21886157	Suhre K	Nature	Metabolic traits	Other	1e-12	0.04	[NR] unit decrease	rs7760535-G	chr6	111853776	C/G	0.394	0.401	0.434	0.438	Yes	-
	1120	21886157	Suhre K	Nature	Metabolic traits	Other	6e-53	0.1	[NR] unit increase	rs780094-T	chr2	27594741	C/T	0.394	0.399	0.4893	0.188	Yes	-
	1121	21886157	Suhre K	Nature	Metabolic traits	Other	6e-15	0.1	[NR] unit decrease	rs8396-C	chr4	159850267	C/T	0.305	0.304	0.1429	0.352	Yes	-
	1122	21886157	Suhre K	Nature	Metabolic traits	Other	3e-74	0.29	[NR] unit increase	rs887829-T	chr2	234333309	C/T	0.314	0.337	0.2972	0.425	Yes	-
	1123	21886157	Suhre K	Nature	Metabolic traits	Other	5e-32	0.16	[NR] unit decrease	rs9332998-C	chr1	47176773	C/T	0.15	0.135	0.07639	0.273	Yes	-
	1124	21886157	Suhre K	Nature	Metabolic traits	Other	2e-14	0.06	[NR] unit decrease	rs9393903-A	chr6	11150895	A/G	0.252	0.242	0.2657	0.273	Yes	-
	1125	21493818	Shaw SY	Circ Cardiovasc Genet	Monocyte early outgrowth colony forming units	Other	4e-06	0.16	[0.08-0.24] unit increase	rs6712720-C	chr2	60135112	C/G	0.491	0.49	0.3993	0.494	Yes	-
	1126	20400778	Morrison AC	Circ Cardiovasc Genet	Mortality among heart failure patients	Other	2e-06	1.58	[0.98-2.56]	rs6868223-A	chr5	33672351	A/G	0.619	0.338	0.5379	0.477	Yes	-
	1127	20400778	Morrison AC	Circ Cardiovasc Genet	Mortality among heart failure patients	Other	7e-06	1.64	[0.94-2.78]	rs8017423-T	chr14	89749663	C/T	0.407	0.62	0.3448	0.33	Yes	-
	1128	22120009	Broderick P	Nat Genet	Multiple myeloma	Other	4e-07	1.29	[1.17-1.42]	rs6746082-A	chr2	25512748	A/C	0.752	0.79	0.8862	0.795	Yes	-
	1129	22190364	Patsopoulos NA	Ann Neurol	Multiple sclerosis	Other	2e-07	1.16	[NR]	rs10411936-A	chr19	16409375	A/G	0.296	0.3	0.2621	0.278	Yes	-
	1130	18997785	Aulchenko YS	Nat Genet	Multiple sclerosis	Other	3e-10	1.34	[1.23-1.48]	rs10492972-C	chr1	10275699	C/T	0.336	0.27	0.3552	0.278	Yes	-
	1131	22190364	Patsopoulos NA	Ann Neurol	Multiple sclerosis	Other	7e-07	1.17	[NR]	rs10866713-A	chr5	158851472	A/G	0.208	0.22	0.1138	0.148	Yes	-
	1132	17660530	Hafler DA	N Engl J Med	Multiple sclerosis	Other	8e-06	1.17	[1.09-1.25]	rs10984447-A	chr9	121024374	A/G	0.721	0.77	0.8403	0.773	Yes	-
	1133	21833088	Sawcer S	Nature	Multiple sclerosis	Other	3e-10	1.12	[1.10-1.13]	rs11581062-G	chr1	101180107	A/G	0.292	NA	0.2103	0.153	Yes	-
	1134	21833088	Sawcer S	Nature	Multiple sclerosis	Other	6e-10	1.11	1.10-1.13]	rs12466022-C	chr2	43212565	A/C	0.748	NA	0.8194	0.932	Yes	-
	1135	22190364	Patsopoulos NA	Ann Neurol	Multiple sclerosis	Other	4e-08	1.23	[NR]	rs12722489-C	chr10	6142018	C/T	0.827	0.85	0.8379	0.892	Yes	-
	1136	17660530	Hafler DA	N Engl J Med	Multiple sclerosis	Other	3e-08	1.25	[1.11-1.36]	rs12722489-C	chr10	6142018	C/T	0.827	0.85	0.8379	0.892	Yes	-
	1137	22190364	Patsopoulos NA	Ann Neurol	Multiple sclerosis	Other	2e-08	1.17	[NR]	rs170934-T	chr3	28054089	C/T	0.468	0.48	0.4542	0.385	Yes	-
	1138	21833088	Sawcer S	Nature	Multiple sclerosis	Other	1e-08	1.11	[1.09-1.13]	rs17174870-G	chr2	112381672	C/T	0.735	NA	0.7746	0.506	Yes	-
	1139	19525955	Bahlo	Nat Genet	Multiple sclerosis	Other	7e-06	1.16	[NR]	rs2104286-A	chr10	6139051	C/T	0.748	0.73	0.7552	0.818	Yes	-
	1140	19525953	De Jager PL	Nat Genet	Multiple sclerosis	Other	9e-08	1.15	[1.04-1.27]	rs2104286-T	chr10	6139051	C/T	0.748	0.76	0.7552	0.818	Yes	-
	1141	21833088	Sawcer S	Nature	Multiple sclerosis	Other	2e-10	1.22	[1.19-1.25]	rs2119704-C	chr14	87557442	A/C	0.932	NA	0.9375	0.948	Yes	-
	1142	21833088	Sawcer S	Nature	Multiple sclerosis	Other	5e-09	1.1	[1.08-1.11]	rs2283792-C	chr22	20461125	G/T	0.527	NA	0.6538	0.494	Yes	-
	1143	21833088	Sawcer S	Nature	Multiple sclerosis	Other	2e-08	1.11	[1.09-1.12]	rs2300603-A	chr14	75075310	C/T	0.704	NA	0.7937	0.759	Yes	-
	1144	20598377	Nischwitz S	J Neuroimmunol	Multiple sclerosis	Other	2e-07	1.66	[1.37-2.00]	rs2503875-A	chr10	43134055	A/G	0.319	NA	0.2292	0.443	Yes	-
	1145	22190364	Patsopoulos NA	Ann Neurol	Multiple sclerosis	Other	8e-08	1.16	[NR]	rs2546890-A	chr5	158692478	A/G	0.562	0.52	0.6285	0.58	Yes	-
	1146	21833088	Sawcer S	Nature	Multiple sclerosis	Other	1e-11	1.11	[1.10-1.13]	rs2546890-A	chr5	158692478	A/G	0.562	NA	0.6285	0.58	Yes	-
	1147	21833088	Sawcer S	Nature	Multiple sclerosis	Other	8e-08	1.12	[1.10-1.14]	rs2744148-G	chr16	1013553	A/G	0.181	NA	0.2586	0.301	Yes	-
	1148	21833088	Sawcer S	Nature	Multiple sclerosis	Other	2e-06	1.08	[1.07-1.09]	rs281380-G	chr19	53906282	C/T	0.358	NA	0.5399	0.443	Yes	-
	1149	18941528	Comabella M	PLoS One	Multiple sclerosis	Other	9e-11	3.3	[2.3-4.9]	rs3129934-T	chr6	32444165	C/T	0.196	NA	0.07194	0.046	Yes	-
	1150	20159113	Jakkula E	Am J Hum Genet	Multiple sclerosis	Other	2e-25	3.43	[NR]	rs3135338-A	chr6	32509195	C/T	0.628	0.13	0.6667	0.631	Yes	-
	1151	21833088	Sawcer S	Nature	Multiple sclerosis	Other	5e-09	1.11	[1.10-1.13]	rs354033-G	chr7	148920397	A/G	0.765	NA	0.7113	0.756	Yes	-
	1152	21833088	Sawcer S	Nature	Multiple sclerosis	Other	5e-07	1.09	[1.08-1.11]	rs4075958-A	chr5	176717118	A/G	0.308	NA	0.3333	0.239	Yes	-
	1153	17660530	Hafler DA	N Engl J Med	Multiple sclerosis	Other	4e-06	1.14	[1.08-1.21]	rs6498169-G	chr16	11156830	A/G	0.397	0.37	0.3778	0.253	Yes	-
	1154	19525955	Bahlo	Nat Genet	Multiple sclerosis	Other	3e-06	1.17	[NR]	rs6604026-G	chr1	93076191	C/T	0.283	0.28	0.1514	0.153	Yes	-
	1155	17660530	Hafler DA	N Engl J Med	Multiple sclerosis	Other	8e-06	1.15	[1.08-1.22]	rs6604026-C	chr1	93076191	C/T	0.283	0.29	0.1514	0.153	Yes	-
	1156	22190364	Patsopoulos NA	Ann Neurol	Multiple sclerosis	Other	3e-08	1.17	[NR]	rs6718520-A	chr2	43179074	A/G	0.45	0.48	0.4	0.534	Yes	-
	1157	19525953	De Jager PL	Nat Genet	Multiple sclerosis	Other	2e-06	1.12	[1.02-1.23]	rs6897932-C	chr5	35910332	C/T	0.757	0.75	0.7882	0.869	Yes	-
	1158	17660530	Hafler DA	N Engl J Med	Multiple sclerosis	Other	3e-07	1.18	[1.11-1.26]	rs6897932-C	chr5	35910332	C/T	0.757	0.75	0.7882	0.869	Yes	-
	1159	19525955	Bahlo	Nat Genet	Multiple sclerosis	Other	5e-11	1.23	[NR]	rs703842-A	chr12	56449006	A/G	0.664	0.67	0.5455	0.489	Yes	-
	1160	20159113	Jakkula E	Am J Hum Genet	Multiple sclerosis	Other	3e-10	1.15	[1.10-1.20]	rs744166-G	chr17	37767727	A/G	0.451	0.41	0.4021	0.5	Yes	-
	1161	21833088	Sawcer S	Nature	Multiple sclerosis	Other	6e-07	1.12	[1.10-1.14]	rs756699-A	chr5	133474474	C/T	0.897	NA	0.7118	0.739	Yes	-
	1162	21654844	Briggs FB	Genes Immun	Multiple sclerosis	Other	8e-06	0.48	[NR] unit increase	rs758944-T	chr7	75791233	A/C	0.235	0.2	0.1897	0.159	Yes	-
	1163	22190364	Patsopoulos NA	Ann Neurol	Multiple sclerosis	Other	1e-07	1.15	[NR]	rs8070463-T	chr17	43123835	C/T	0.504	0.5	0.5915	0.381	Yes	-
	1164	21833088	Sawcer S	Nature	Multiple sclerosis	Other	1e-11	1.21	[1.18-1.24]	rs9282641-G	chr3	123279458	A/G	0.902	NA	0.8671	0.898	Yes	-
	1165	20453840	Sanna S	Nat Genet	Multiple sclerosis	Other	2e-10	1.4	[1.27-1.57]	rs9657904-T	chr3	107069404	C/T	0.792	0.826	0.837	0.756	Yes	-
	1166	19198609	Kathiresan S	Nat Genet	Myocardial infarction (early onset)	Other	1e-08	1.15	[1.10-1.21]	rs11206510-T	chr1	55268627	C/T	0.836	0.81	0.90345	0.955	Yes	-
	1167	19198609	Kathiresan S	Nat Genet	Myocardial infarction (early onset)	Other	2e-09	1.15	[1.10-1.20]	rs1122608-G	chr19	11024601	G/T	0.743	0.75	0.6806	0.761	Yes	-
	1168	19198609	Kathiresan S	Nat Genet	Myocardial infarction (early onset)	Other	1e-09	1.12	[1.08-1.17]	rs12526453-C	chr6	13035530	C/G	0.633	0.65	0.631	0.858	Yes	-
	1169	19198609	Kathiresan S	Nat Genet	Myocardial infarction (early onset)	Other	7e-09	1.17	[1.11-1.24]	rs1746048-C	chr10	44095830	C/T	0.854	0.84	0.8077	0.699	Yes	-
	1170	19198609	Kathiresan S	Nat Genet	Myocardial infarction (early onset)	Other	1e-09	1.14	[1.10-1.19]	rs17465637-C	chr1	220890152	A/C	0.732	0.72	0.7103	0.665	Yes	-
	1171	19198609	Kathiresan S	Nat Genet	Myocardial infarction (early onset)	Other	3e-44	1.29	[1.25-1.34]	rs4977574-G	chr9	22088574	A/G	0.46	0.56	0.5655	0.477	Yes	-
	1172	19198609	Kathiresan S	Nat Genet	Myocardial infarction (early onset)	Other	1e-08	1.17	[1.11-1.23]	rs6725887-C	chr2	203454130	C/T	0.159	0.14	0.05594	0.011	Yes	-
	1173	21095009	Li YJ	Ophthalmology	Myopia (pathological)	Other	8e-06	1.24	[1.11-1.39]	rs6885224-C	chr5	11222945	C/T	0.41	0.26	0.5036	0.483	Yes	-
	1174	20711174	Hor H	Nat Genet	Narcolepsy	Other	5e-07	1.54	[1.30-1.95]	rs1154155-G	chr14	22072524	G/T	0.146	0.15	0.2014	0.136	Yes	-
	1175	19412176	Hallmayer J	Nat Genet	Narcolepsy	Other	3e-22	1.69	[1.52-1.88]	rs1154155-C	chr14	22072524	G/T	0.146	0.14	0.2014	0.136	Yes	-
	1176	18820697	Miyagawa T	Nat Genet	Narcolepsy	Other	6e-08	1.63	[1.37-1.95]	rs5770917-C	chr22	49364219	C/T	0.049	0.17	0.07447	0.201	Yes	-
	1177	21273288	Del Greco M F	Hum Mol Genet	Natriuretic peptide levels	Other	7e-06	0.13	[0.07-0.19 unit decrease	rs6009824-A	chr22	48472377	A/G	0.186	0.15	0.2379	0.381	Yes	-
	1178	21124317	Wang K	Nature	Neuroblastoma	Other	8e-17	1.4	[NR]	rs4712653-C	chr6	22233943	C/T	0.425	0.46	0.2986	0.586	Yes	-
	1179	21203500	Lauc G	PLoS Genet	N-glycan levels	Other	4e-17	0.41	[0.31-0.51] unit decrease	rs3760776-A	chr19	5790746	A/G	0.106	0.11	0.2882	0.161	Yes	-
	1180	21203500	Lauc G	PLoS Genet	N-glycan levels	Other	9e-10	0.3	[0.20-0.40] unit decrease	rs3760776-A	chr19	5790746	A/G	0.106	0.11	0.2882	0.161	Yes	-
	1181	21203500	Lauc G	PLoS Genet	N-glycan levels	Other	1e-12	0.34	[0.24-0.44] unit decrease	rs3760776-A	chr19	5790746	A/G	0.106	0.11	0.2882	0.161	Yes	-
	1182	21203500	Lauc G	PLoS Genet	N-glycan levels	Other	3e-12	0.34	[0.24-0.44] unit decrease	rs3760776-A	chr19	5790746	A/G	0.106	0.11	0.2882	0.161	Yes	-
	1183	21203500	Lauc G	PLoS Genet	N-glycan levels	Other	2e-08	0.17	[0.11-0.23] unit decrease	rs7953249-G	chr12	119888107	A/G	0.469	0.45	0.4931	0.551	Yes	-
	1184	17158188	Bierut LJ	Hum Mol Genet	Nicotine dependence	Other	2e-06	1.46	[1.23-1.73]	rs2836823-T	chr21	39302119	C/T	0.478	0.4	0.3438	0.136	Yes	-
	1185	17158188	Bierut LJ	Hum Mol Genet	Nicotine dependence	Other	6e-06	1.14	[0.97-1.35]	rs4142041-G	chr10	68310957	A/G	0.351	0.34	0.3566	0.488	Yes	-
	1186	20708005	Chalasani N	Gastroenterology	Non-alcoholic fatty liver disease histology (lobular)	Other	5e-06	0.75	[NR] unit increase	rs10067427-G	chr5	99369946	A/G	0.381	0.3	0.3924	0.182	Yes	-
	1187	20708005	Chalasani N	Gastroenterology	Non-alcoholic fatty liver disease histology (lobular)	Other	8e-06	0.61	[NR] unit increase	rs11083271-A	chr18	24180057	C/T	0.345	0.34	0.4472	0.307	Yes	-
	1188	20708005	Chalasani N	Gastroenterology	Non-alcoholic fatty liver disease histology (lobular)	Other	8e-07	0.36	[NR] unit increase	rs887304-A	chr12	3627809	C/T	0.314	0.31	0.1806	0.131	Yes	-
	1189	20708005	Chalasani N	Gastroenterology	Non-alcoholic fatty liver disease histology (other)	Other	9e-06	0.58	[NR] unit increase	rs1305088-A	chr13	28176450	C/T	0.071	0.06	0.2361	0.216	Yes	-
	1190	20708005	Chalasani N	Gastroenterology	Non-alcoholic fatty liver disease histology (other)	Other	2e-06	4.13	[NR] unit increase	rs1529093-A	chr2	177617841	C/T	0.469	0.41	0.5069	0.443	Yes	-
	1191	20708005	Chalasani N	Gastroenterology	Non-alcoholic fatty liver disease histology (other)	Other	7e-06	0.92	[NR] unit increase	rs6079395-A	chr20	14275899	A/G	0.597	0.49	0.3881	0.216	Yes	-
	1192	20708005	Chalasani N	Gastroenterology	Non-alcoholic fatty liver disease histology (other)	Other	1e-06	0.74	[NR] unit increase	rs643608-G	chr21	43592990	C/T	0.288	0.38	0.4688	0.46	Yes	-
	1193	21866343	Ahn MJ	Hum Genet	Non-small cell lung cancer	Other	1e-06	1.47	[1.27-1.72]	rs11080466-C	chr18	10889028	A/G	0.304	NA	0.375	0.364	Yes	-
	1194	21079520	Sato Y	J Thorac Oncol	Non-small cell lung cancer	Other	3e-07	4.96	[2.52-9.76] (CT)	rs1209950-T	chr21	39095398	C/T	0.376	NA	0.2923	0.125	Yes	-
	1195	20876614	Yoon KA	Hum Mol Genet	Non-small cell lung cancer	Other	7e-06	1.3	[1.10-1.54]	rs16951095-C	chr18	7032911	C/T	0.938	0.78	0.96528	0.936	Yes	-
	1196	20876614	Yoon KA	Hum Mol Genet	Non-small cell lung cancer	Other	2e-08	1.3	[1.19-1.42]	rs2131877-G	chr3	196339663	A/G	0.788	0.44	0.809	0.636	Yes	-
	1197	20876614	Yoon KA	Hum Mol Genet	Non-small cell lung cancer	Other	8e-06	1.43	[1.14-1.82]	rs9303196-T	chr17	5848167	A/T	0.832	0.07	0.7465	0.812	Yes	-
	1198	20023658	Mangold E	Nat Genet	Nonsyndromic cleft lip with or without cleft palate	Other	7e-06	1.5	[1.32-1.69]	rs17760296-G	chr17	51970616	G/T	0.17	0.16	0.1586	0.068	Yes	-
	1199	20023658	Mangold E	Nat Genet	Nonsyndromic cleft lip with or without cleft palate	Other	1e-08	1.38	[1.21-1.56]	rs227731-C	chr17	52128237	G/T	0.509	0.42	0.3776	0.381	Yes	-
	1200	19270707	Birnbaum S	Nat Genet	Nonsyndromic cleft lip with or without cleft palate	Other	2e-06	NR	NR	rs642961-A	chr1	208055893	A/G	0.223	NA	0.1379	0.25	Yes	-
	1201	19151714	Meyre D	Nat Genet	Obesity	Obesity	2e-07	1.56	[1.10-2.78]	rs10508503-C	chr10	16339957	C/T	0.908	0.91	0.95862	0.989	Yes	-
	1202	19151714	Meyre D	Nat Genet	Obesity	Obesity	1e-28	1.39	[1.27-1.51]	rs1421085-C	chr16	52358455	C/T	0.46	0.4	0.3916	0.278	No	LD to rs9939609
	1203	19151714	Meyre D	Nat Genet	Obesity	Obesity	5e-15	1.22	[1.05-1.40]	rs17782313-C	chr18	56002077	C/T	0.265	0.18	0.1958	0.301	No	Duplicated
	1204	21708048	Jiao H	BMC Med Genomics	Obesity	Obesity	3e-10	1.26	[1.12-1.41]	rs2116830-G	chr10	78316542	G/T	0.77	0.8	0.8893	0.955	Yes	-
	1205	21708048	Jiao H	BMC Med Genomics	Obesity	Obesity	5e-17	1.36	[1.20-1.55]	rs988712-G	chr11	27519958	G/T	0.754	0.75	0.6724	0.739	No	LD to rs6265
	1206	18159244	Hinney A	PLoS One	Obesity (early onset extreme)	Obesity	1e-07	1.66	[1.37-2.01]	rs1121980-T	chr16	52366748	A/G	0.482	0.41	0.441	0.341	No	LD to rs9939609
	1207	19553259	Cotsapas C	Hum Mol Genet	Obesity (extreme)	Obesity	5e-06	1.41	[1.21-1.63]	rs12635698-C	chr3	16383493	C/T	0.142	0.15	0.2021	0.131	Yes	-
	1208	21935397	Paternoster L	PLoS One	Obesity (extreme)	Obesity	5e-06	NR	NR	rs699363-G	chr14	71762246	A/G	0.022	NA	0	0	Yes	-
	1209	21935397	Paternoster L	PLoS One	Obesity (extreme)	Obesity	3e-08	NR	NR	rs734597-A	chr6	50944238	A/G	0.155	NA	0.1793	0.307	No	LD to rs987237
	1210	21935397	Paternoster L	PLoS One	Obesity (extreme)	Obesity	5e-06	NR	NR	rs970843-C	chr15	96693552	C/G	0.192	NA	0.2029	0.153	Yes	-
	1211	19553259	Cotsapas C	Hum Mol Genet	Obesity (extreme)	Obesity	6e-12	1.48	[1.33-1.66]	rs9941349-T	chr16	52382989	C/T	0.473	0.43	0.4062	0.324	No	LD to rs9939609
	1212	19714249	Liu YZ	PLoS One	Obesity and osteoporosis	Other	4e-07	NR	NR	rs297325-C	chr11	16346170	C/T	0.208	0.23	0.2063	0.21	Yes	-
	1213	19714249	Liu YZ	PLoS One	Obesity and osteoporosis	Other	5e-07	NR	NR	rs4756846-C	chr11	16360087	C/T	0.124	0.12	0.05172	0.017	Yes	-
	1214	17658951	Scuteri A	PLoS Genet	Obesity-related traits	Obesity	9e-07	0.13	[NR] SD lower (BMI)	rs9930506-A	chr16	52387966	A/G	0.518	0.54	0.5629	0.352	No	Duplicated
	1215	17658951	Scuteri A	PLoS Genet	Obesity-related traits	Obesity	9e-07	0.12	[NR] SD lower (weight)	rs9930506-A	chr16	52387966	A/G	0.518	0.54	0.5629	0.352	No	Duplicated
	1216	17658951	Scuteri A	PLoS Genet	Obesity-related traits	Obesity	3e-08	0.16	[NR] SD lower (hip)	rs9930506-A	chr16	52387966	A/G	0.518	0.54	0.5629	0.352	Yes	-
	1217	20548946	Ramdas WD	PLoS Genet	Optic disc parameters	Other	5e-09	0.03	[0.02-0.04] mm increase	rs1362756-C	chr16	50015791	C/G	0.261	0.28	0.2552	0.17	Yes	-
	1218	20548946	Ramdas WD	PLoS Genet	Optic disc parameters	Other	3e-35	0.07	[0.06-0.08] mm decrease	rs1900004-T	chr10	69670887	C/T	0.208	0.22	0.2797	0.216	Yes	-
	1219	20395239	Macgregor S	Hum Mol Genet	Optic disc size (cup)	Other	6e-06	0.17	[0.09-0.25] unit decrease	rs10858945-A	chr12	88967613	A/G	0.531	NA	0.5286	0.341	Yes	-
	1220	20395239	Macgregor S	Hum Mol Genet	Optic disc size (disc)	Other	3e-07	0.41	[0.22-0.60] unit decrease	rs491391-A	chr2	141078528	A/C	0.965	NA	0.97931	0.954	Yes	-
	1221	20395239	Macgregor S	Hum Mol Genet	Optic disc size (rim)	Other	9e-06	0.15	[0.06-0.24] unit increase	rs10483727-C	chr14	60142628	C/T	0.621	NA	0.4155	0.483	Yes	-
	1222	20395239	Macgregor S	Hum Mol Genet	Optic disc size (rim)	Other	9e-06	0.16	[0.08-0.24] unit decrease	rs735854-C	chr22	35009004	C/T	0.633	NA	0.5979	0.665	Yes	-
	1223	20112360	Kerkhof HJ	Arthritis Rheum	Osteoarthritis	Other	8e-08	1.14	[1.09-1.19]	rs3815148-C	chr7	106725656	A/C	0.217	0.23	0.169	0.167	Yes	-
	1224	18594024	Sarasquete ME	Blood	Osteonecrosis of the jaw	Other	1e-06	12.75	[3.7-43.5]	rs1934951-T	chr10	96788538	C/T	0.159	0.12	0.2621	0.301	Yes	-
	1225	20072603	Guo Y	PLoS Genet	Osteoporosis	Other	2e-09	2.25	[1.72-2.94]	rs13182402-G	chr5	125946047	A/G	0.093	0.05	0.1469	0.136	Yes	-
	1226	20548944	Hsu YH	PLoS Genet	Osteoporosis	Other	9e-07	0.13	[NR] g/cm2 increase	rs17184557-A	chr18	65293837	A/T	0.272	0.23	0.1241	0.102	Yes	-
	1227	20548944	Hsu YH	PLoS Genet	Osteoporosis	Other	1e-07	0.19	[NR] unit decrease	rs2278729-A	chr2	101035289	A/G	0.363	0.33	0.3028	0.233	Yes	-
	1228	20548944	Hsu YH	PLoS Genet	Osteoporosis	Other	4e-07	0.17	[NR] cm increase	rs7227401-T	chr18	20192656	G/T	0.409	0.39	0.3433	0.378	Yes	-
	1229	19862010	Ganesh SK	Nat Genet	Other erythrocyte phenotypes	Other	1e-10	0	[0.001-0.002] g/dl decrease	rs857721-A	chr1	156879172	A/T	0.319	NA	0.2977	0.188	Yes	-
	1230	20852632	Goode EL	Nat Genet	Ovarian cancer	Other	3e-09	1.19	[1.12-1.25]	rs10088218-G	chr8	129613131	A/G	0.875	NA	0.8732	0.943	Yes	-
	1231	21623375	Albagha OM	Nat Genet	Paget's disease	Other	4e-38	1.67	[1.54-1.80]	rs1561570-T	chr10	13195732	C/T	0.535	0.53	0.5317	0.494	Yes	-
	1232	20436471	Albagha OM	Nat Genet	Paget's disease	Other	2e-11	1.46	[1.30-1.63]	rs2957128-A	chr18	58211715	A/G	0.403	0.38	0.3214	0.455	Yes	-
	1233	22158540	Wu C	Nat Genet	Pancreatic cancer	Other	5e-06	1.24	[1.13-1.35]	rs10974531-A	chr9	4416631	A/C	0.297	NA	0.2576	0.267	Yes	-
	1234	22158540	Wu C	Nat Genet	Pancreatic cancer	Other	5e-11	1.23	[1.16-1.31]	rs12413624-T	chr10	120268934	A/T	0.522	0.37	0.6232	0.705	Yes	-
	1235	20686608	Low SK	PLoS One	Pancreatic cancer	Other	7e-06	3.15	[1.91-5.21]	rs12615966-A	chr2	104745389	C/T	0.111	0.1	0.2643	0.051	Yes	-
	1236	22158540	Wu C	Nat Genet	Pancreatic cancer	Other	4e-10	1.23	[1.15-1.32]	rs2255280-T	chr5	39430746	A/C	1	NA	0.996552	0.943	Yes	-
	1237	22158540	Wu C	Nat Genet	Pancreatic cancer	Other	6e-06	1.2	[1.11-1.29]	rs2689154-G	chr1	236974976	C/G	0.818	0.17	0.3652	0	Yes	-
	1238	22158540	Wu C	Nat Genet	Pancreatic cancer	Other	2e-13	1.27	[1.19-1.33]	rs372883-T	chr21	29639608	C/T	0.509	NA	0.5382	0.352	Yes	-
	1239	20101243	Petersen GM	Nat Genet	Pancreatic cancer	Other	2e-10	1.3	[1.19-1.41]	rs3790844-T	chr1	198274055	A/G	0.788	0.76	0.7867	0.517	Yes	-
	1240	20101243	Petersen GM	Nat Genet	Pancreatic cancer	Other	7e-07	1.19	[1.11-1.27]	rs401681-T	chr5	1375087	C/T	0.434	0.45	0.2993	0.21	Yes	-
	1241	22158540	Wu C	Nat Genet	Pancreatic cancer	Other	7e-07	1.2	[1.12-1.30]	rs4269383-C	chr6	156239194	A/G	0.348	NA	0.3007	0.443	Yes	-
	1242	22158540	Wu C	Nat Genet	Pancreatic cancer	Other	1e-10	1.25	[1.17-1.34]	rs5768709-G	chr22	47308233	A/G	0.354	0.23	0.3662	0.341	Yes	-
	1243	20686608	Low SK	PLoS One	Pancreatic cancer	Other	5e-06	1.45	[1.24-1.71]	rs7832232-A	chr8	38588460	A/G	0.442	0.45	0.6099	0.733	Yes	-
	1244	22158540	Wu C	Nat Genet	Pancreatic cancer	Other	1e-06	1.27	[1.15-1.39]	rs9363918-A	chr6	69198729	G/T	0.586	NA	0.5957	0.494	Yes	-
	1245	22158540	Wu C	Nat Genet	Pancreatic cancer	Other	5e-13	1.26	[1.18-1.34]	rs9573163-G	chr13	72806847	C/G	0.735	0.43	0.6354	0.702	Yes	-
	1246	20070850	Edwards TL	Ann Hum Genet	Parkinson's disease	Other	3e-06	1.33	[1.19-1.52]	rs10464059-A	chr5	179726814	A/G	0.143	NA	0.2943	0.261	Yes	-
	1247	21044948	Spencer CC	Hum Mol Genet	Parkinson's disease	Other	3e-06	1.23	[1.13-1.33]	rs7617877-A	chr3	28680768	A/G	0.353	0.36	0.3043	0.5	Yes	-
	1248	19772629	Latourelle JC	BMC Med Genet	Parkinson's disease (age of onset)	Other	9e-06	6.85	[NR] years younger	rs7577851-T	chr2	69577214	C/T	0.195	NA	0.1667	0.295	Yes	-
	1249	18985386	Pankratz N	Hum Genet	Parkinson's disease (familial)	Other	7e-07	1.7	[NR]	rs1564282-T	chr4	842313	C/T	0.111	0.09	0.1448	0.222	Yes	-
	1250	19897590	Schaefer AS	Hum Mol Genet	Periodontitis	Other	6e-09	1.59	[1.36-1.86]	rs1537415-G	chr9	137669543	C/G	0.571	0.38	0.6736	0.727	Yes	-
	1251	20610895	Koriyama H	J Atheroscler Thromb	Peripheral artery disease	Coronary Artery Disease	2e-06	1.84	[1.43-2.37]	rs2359536-C	chr10	20939614	C/T	0.385	NonEuro	0.4859	0.364	Yes	-
	1252	18957941	Terracciano A	Mol Psychiatry	Personality dimensions	Other	3e-06	0.13	[NR] s.d. increase	rs2540226-T	chr2	39812564	A/C	0.566	0.53	0.4336	0.477	Yes	-
	1253	21829377	Lemaitre RN	PLoS Genet	Phospholipid levels (plasma)	Other	8e-08	0.02	[NR] % increase	rs10792320-A	chr11	61502867	A/C	0.664	NA	0.6014	0.347	Yes	-
	1254	21829377	Lemaitre RN	PLoS Genet	Phospholipid levels (plasma)	Other	5e-11	0.04	[NR] % decrease	rs1321535-T	chr6	11184012	G/T	0.562	NA	0.5556	0.408	Yes	-
	1255	21829377	Lemaitre RN	PLoS Genet	Phospholipid levels (plasma)	Other	1e-38	0.04	[NR] % decrease	rs1321535-T	chr6	11184012	G/T	0.562	NA	0.5556	0.408	Yes	-
	1256	21829377	Lemaitre RN	PLoS Genet	Phospholipid levels (plasma)	Other	2e-07	0.07	[NR] % increase	rs1514178-T	chr1	60978057	C/T	0.973	NA	0.993007	0	Yes	-
	1257	21829377	Lemaitre RN	PLoS Genet	Phospholipid levels (plasma)	Other	4e-154	0.07	[NR] % increase	rs174547-T	chr11	61327359	C/T	0.656	NA	0.7207	0.902	Yes	-
	1258	21829377	Lemaitre RN	PLoS Genet	Phospholipid levels (plasma)	Other	3e-64	0.02	[NR] % decrease	rs174547-T	chr11	61327359	C/T	0.656	NA	0.7207	0.902	Yes	-
	1259	21829377	Lemaitre RN	PLoS Genet	Phospholipid levels (plasma)	Other	1e-15	0.11	[NR] % decrease	rs2236212-C	chr6	11103001	C/G	0.447	NA	0.4379	0.597	Yes	-
	1260	21829377	Lemaitre RN	PLoS Genet	Phospholipid levels (plasma)	Other	1e-43	0.04	[NR] % decrease	rs3734398-T	chr6	11090959	C/T	0.549	NA	0.5069	0.341	Yes	-
	1261	21829377	Lemaitre RN	PLoS Genet	Phospholipid levels (plasma)	Other	9e-60	0.02	[NR] % increase	rs4246215-T	chr11	61320875	G/T	0.372	NA	0.2639	0.102	Yes	-
	1262	21829377	Lemaitre RN	PLoS Genet	Phospholipid levels (plasma)	Other	1e-139	0.07	[NR] % decrease	rs4246215-T	chr11	61320875	G/T	0.372	NA	0.2639	0.102	Yes	-
	1263	21829377	Lemaitre RN	PLoS Genet	Phospholipid levels (plasma)	Other	6e-55	0.08	[NR] % decrease	rs4246215-T	chr11	61320875	G/T	0.372	NA	0.2639	0.102	Yes	-
	1264	21829377	Lemaitre RN	PLoS Genet	Phospholipid levels (plasma)	Other	5e-13	0.01	[NR] % decrease	rs4711171-T	chr6	11182333	C/T	0.442	NA	0.5104	0.667	Yes	-
	1265	21829377	Lemaitre RN	PLoS Genet	Phospholipid levels (plasma)	Other	9e-09	0.02	[NR] % increase	rs780094-T	chr2	27594741	C/T	0.394	NA	0.4893	0.188	Yes	-
	1266	21829377	Lemaitre RN	PLoS Genet	Phospholipid levels (plasma)	Other	4e-07	0.05	[NR] % increase	rs9586179-T	chr13	102858088	C/T	0.973	NA	0.92647	0.925	Yes	-
	1267	20526338	Johnson AD	Nat Genet	Platelet aggregation	Other	7e-06	NR	NR	rs179429-A	chr11	2507306	A/G	0.195	0.167	0.2207	0.261	Yes	-
	1268	20526338	Johnson AD	Nat Genet	Platelet aggregation	Other	7e-07	NR	NR	rs525455-G	chr10	13143291	A/G	0.412	0.459	0.5317	0.489	Yes	-
	1269	22139419	Gieger C	Nature	Platelet counts	Other	2e-14	3.64	[2.70-4.57] 10^9/l increase	rs10512472-C	chr17	30908917	C/T	0.097	NA	0.2153	0.222	Yes	-
	1270	22139419	Gieger C	Nature	Platelet counts	Other	2e-10	3.01	[2.08-3.95] 10^9/l increase	rs11789898-T	chr9	135915484	G/T	0.195	NA	0.2234	0	Yes	-
	1271	22139419	Gieger C	Nature	Platelet counts	Other	1e-11	3.41	[2.43-4.40] 10^9/l increase	rs1719271-G	chr15	62970854	A/G	0.113	NA	0.1728	0.184	Yes	-
	1272	22139419	Gieger C	Nature	Platelet counts	Other	4e-10	2.6	[1.79-3.41] 10^9/l increase	rs17356664-C	chr19	50432611	C/T	0.726	NA	0.5909	0.614	Yes	-
	1273	22139419	Gieger C	Nature	Platelet counts	Other	1e-09	6.07	[4.13-8.02] 10^9/l increase	rs17568628-T	chr5	76082695	C/T	0.947	NA	0.97569	0.983	Yes	-
	1274	22139419	Gieger C	Nature	Platelet counts	Other	1e-10	2.39	[1.67-3.12] 10^9/l increase	rs2070729-A	chr5	131847820	A/C	0.465	NA	0.4261	0.653	Yes	-
	1275	22139419	Gieger C	Nature	Platelet counts	Other	2e-10	3.54	[2.45-4.62] 10^9/l increase	rs2297067-T	chr14	102636538	C/T	0.171	NA	0.3489	0.239	Yes	-
	1276	22139419	Gieger C	Nature	Platelet counts	Other	1e-10	2.35	[1.63-3.06] 10^9/l increase	rs399604-C	chr6	33082992	C/T	0.434	NA	0.2674	0.392	Yes	-
	1277	22139419	Gieger C	Nature	Platelet counts	Other	3e-10	2.45	[1.69-3.22] 10^9/l increase	rs4246215-T	chr11	61320875	G/T	0.372	NA	0.2639	0.102	Yes	-
	1278	22139419	Gieger C	Nature	Platelet counts	Other	8e-18	3.08	[2.38-3.78] 10^9/l increase	rs441460-G	chr6	25656267	A/G	0.571	NA	0.4965	0.551	Yes	-
	1279	22139419	Gieger C	Nature	Platelet counts	Other	8e-11	4.73	[3.31-6.15] 10^9/l increase	rs4938642-C	chr11	118605116	C/G	0.076	NA	0.1875	0.33	Yes	-
	1280	22139419	Gieger C	Nature	Platelet counts	Other	3e-18	3.26	[2.53-4] 10^9/l increase	rs559972-T	chr17	24838622	C/T	0.442	NA	0.464	0.358	Yes	-
	1281	22139419	Gieger C	Nature	Platelet counts	Other	4e-11	2.53	[1.78-3.28] 10^9/l increase	rs7342306-G	chr12	6161354	A/G	0.597	NA	0.6562	0.79	Yes	-
	1282	22139419	Gieger C	Nature	Platelet counts	Other	3e-11	2.76	[1.94-3.57] 10^9/l increase	rs7641175-A	chr3	18286416	A/G	0.823	NA	0.7028	0.739	Yes	-
	1283	22139419	Gieger C	Nature	Platelet counts	Other	1e-10	3.92	[2.73-5.12] 10^9/l increase	rs7961894-C	chr12	120849966	C/T	0.893	NA	0.96207	0.983	Yes	-
	1284	21151128	Chen ZJ	Nat Genet	Polycystic ovary syndrome	Other	9e-18	1.51	[1.37-1.65]	rs10818854-A	chr9	125486599	A/G	0.058	0.09	0.04138	0.085	Yes	-
	1285	21151128	Chen ZJ	Nat Genet	Polycystic ovary syndrome	Other	3e-23	1.39	[1.30-1.49]	rs12478601-C	chr2	43575012	C/T	0.434	0.71	0.2207	0.312	Yes	-
	1286	21151128	Chen ZJ	Nat Genet	Polycystic ovary syndrome	Other	8e-21	1.41	[1.30-1.49]	rs13405728-A	chr2	48831663	A/G	0.951	0.76	0.93357	0.881	Yes	-
	1287	21151128	Chen ZJ	Nat Genet	Polycystic ovary syndrome	Other	2e-23	1.49	[1.39-1.61]	rs13429458-A	chr2	43492342	A/C	0.907	0.91	0.7321	0.875	Yes	-
	1288	21151128	Chen ZJ	Nat Genet	Polycystic ovary syndrome	Other	8e-19	1.34	[1.26-1.43]	rs2479106-G	chr9	125565033	A/G	0.296	0.22	0.2724	0.29	Yes	-
	1289	20062060	Pfeufer A	Nat Genet	PR interval	Other	5e-11	1.36	[0.95-1.77] ms increase	rs11897119-C	chr2	66625504	C/T	0.429	0.39	0.2655	0.205	Yes	-
	1290	20062060	Pfeufer A	Nat Genet	PR interval	Other	9e-13	1.49	[1.08-1.90] ms decrease	rs251253-C	chr5	172412942	C/T	0.389	0.4	0.5833	0.597	Yes	-
	1291	20062060	Pfeufer A	Nat Genet	PR interval	Other	3e-08	1.19	[0.77-1.61] ms decrease	rs4944092-G	chr11	75587267	A/G	0.336	0.32	0.1725	0.176	Yes	-
	1292	21399635	Mells GF	Nat Genet	Primary biliary cirrhosis	Other	9e-17	1.58	[1.41-1.76]	rs12531711-G	chr7	128404702	A/G	0.124	0.11	0.1483	0.159	Yes	-
	1293	21399635	Mells GF	Nat Genet	Primary biliary cirrhosis	Other	3e-12	1.29	[1.20-1.38]	rs12924729-G	chr16	11095284	A/G	0.71	0.68	0.7345	0.523	Yes	-
	1294	21399635	Mells GF	Nat Genet	Primary biliary cirrhosis	Other	3e-11	1.35	[1.23-1.47]	rs2293370-G	chr3	120702624	A/G	0.85	0.8	0.8793	0.83	Yes	-
	1295	20639880	Liu X	Nat Genet	Primary biliary cirrhosis	Other	8e-12	1.48	[NR]	rs3790567-A	chr1	67594965	A/G	0.261	0.232	0.3241	0.233	Yes	-
	1296	19458352	Hirschfield GM	N Engl J Med	Primary biliary cirrhosis	Other	3e-11	1.51	[1.33-1.70]	rs3790567-A	chr1	67594965	A/G	0.261	0.24	0.3241	0.233	Yes	-
	1297	21399635	Mells GF	Nat Genet	Primary biliary cirrhosis	Other	2e-16	1.38	[1.28-1.50]	rs485499-T	chr3	161228557	C/T	0.593	0.57	0.7254	0.79	Yes	-
	1298	21399635	Mells GF	Nat Genet	Primary biliary cirrhosis	Other	4e-12	1.26	[1.18-1.34]	rs7665090-C	chr4	103770651	A/G	0.544	0.52	0.3741	0.443	Yes	-
	1299	19458352	Hirschfield GM	N Engl J Med	Primary biliary cirrhosis	Other	8e-06	1.29	[1.15-1.44]	rs907092-A	chr17	35175785	A/G	0.487	0.45	0.458	0.341	Yes	-
	1300	20639880	Liu X	Nat Genet	Primary biliary cirrhosis	Other	2e-09	1.38	[NR]	rs9303277-T	chr17	35229995	C/T	0.513	0.51	0.4896	0.369	Yes	-
	1301	20195514	Pillas D	PLoS Genet	Primary tooth development (number of teeth)	Other	9e-07	0.18	[NR] % variance explained	rs10506525-C	chr12	64069645	C/T	0.611	0.27	0.6897	0.807	Yes	-
	1302	20195514	Pillas D	PLoS Genet	Primary tooth development (number of teeth)	Other	3e-08	0.51	[NR] % variance explained	rs1956529-T	chr14	67858677	C/T	0.629	0.38	0.6127	0.67	Yes	-
	1303	20195514	Pillas D	PLoS Genet	Primary tooth development (number of teeth)	Other	6e-07	0.44	[NR] % variance explained	rs6504340-G	chr17	43972018	A/G	0.799	0.22	0.8493	0.864	Yes	-
	1304	20195514	Pillas D	PLoS Genet	Primary tooth development (time to first tooth eruption)	Other	6e-09	0.46	[NR] % variance explained	rs10506525-C	chr12	64069645	C/T	0.611	0.27	0.6897	0.807	Yes	-
	1305	21873549	Strawbridge RJ	Diabetes	Proinsulin levels	Insulin	3e-09	NR	NR	rs4790333-T	chr17	2209453	C/T	0.398	0.45	0.559	0.705	Yes	-
	1306	19767754	Gudmundsson J	Nat Genet	Prostate cancer	Other	3e-10	1.12	[1.08-1.16]	rs10934853-A	chr3	129521063	A/C	0.239	0.28	0.3379	0.483	Yes	-
	1307	21743057	Schumacher FR	Hum Mol Genet	Prostate cancer	Other	4e-06	1.12	[1.05-1.18]	rs13252298-A	chr8	128164338	A/G	0.699	NA	0.5511	0.5	Yes	-
	1308	19767753	Eeles RA	Nat Genet	Prostate cancer	Other	3e-30	1.18	[1.14-1.22]	rs1512268-A	chr8	23582408	C/T	0.42	0.45	0.5699	0.443	Yes	-
	1309	19767754	Gudmundsson J	Nat Genet	Prostate cancer	Other	3e-14	1.8	[1.55-2.09]	rs16901979-A	chr8	128194098	A/C	0.031	0.04	0.02414	0.131	Yes	-
	1310	17401366	Gudmundsson J	Nat Genet	Prostate cancer	Other	1e-12	1.79	[1.53-2.11] (EA)	rs16901979-A	chr8	128194098	A/C	0.031	0.03	0.02414	0.131	Yes	-
	1311	19767753	Eeles RA	Nat Genet	Prostate cancer	Other	4e-15	1.11	[1.08-1.15]	rs17021918-C	chr4	95781900	C/T	0.646	0.65	0.7778	0.795	Yes	-
	1312	19767753	Eeles RA	Nat Genet	Prostate cancer	Other	3e-08	NR	NR	rs17181170-G	chr3	87256014	A/G	0.504	NA	0.5846	0.659	Yes	-
	1313	20676098	Takata R	Nat Genet	Prostate cancer	Other	8e-08	1.15	[1.09-1.21]	rs1983891-T	chr6	41644405	C/T	0.274	0.41	0.2882	0.324	Yes	-
	1314	19767753	Eeles RA	Nat Genet	Prostate cancer	Other	1e-19	NR	NR	rs3123078-T	chr10	51194977	C/T	0.58	NA	0.5276	0.386	Yes	-
	1315	20676098	Takata R	Nat Genet	Prostate cancer	Other	2e-12	1.22	[1.15-1.28]	rs339331-T	chr6	117316745	C/T	0.637	0.37	0.6414	0.591	Yes	-
	1316	18264096	Thomas G	Nat Genet	Prostate cancer	Other	3e-19	1.66	[1.47-1.87]	rs4242382-A	chr8	128586755	A/G	0.071	0.12	0.1127	0.136	Yes	-
	1317	21743057	Schumacher FR	Hum Mol Genet	Prostate cancer	Other	3e-16	1.56	[1.40-1.73]	rs4242384-C	chr8	128587736	A/C	0.071	NA	0.1076	0.136	Yes	-
	1318	19767753	Eeles RA	Nat Genet	Prostate cancer	Other	2e-24	NR	NR	rs4242384-A	chr8	128587736	A/C	0.929	NA	0.8924	0.864	Yes	-
	1319	18264097	Eeles RA	Nat Genet	Prostate cancer	Other	3e-16	1.88	[NR]	rs4242384-C	chr8	128587736	A/C	0.071	0.09	0.1076	0.136	Yes	-
	1320	19767753	Eeles RA	Nat Genet	Prostate cancer	Other	6e-29	1.16	[1.14-1.20]	rs5759167-T	chr22	41830156	G/T	0.451	0.53	0.587	0.46	Yes	-
	1321	21743057	Schumacher FR	Hum Mol Genet	Prostate cancer	Other	2e-10	1.15	[1.10-1.20]	rs651164-G	chr6	160501364	A/G	0.655	NA	0.5897	0.57	Yes	-
	1322	19767753	Eeles RA	Nat Genet	Prostate cancer	Other	2e-09	NR	NR	rs651164-A	chr6	160501364	A/G	0.345	NA	0.4103	0.43	Yes	-
	1323	21743057	Schumacher FR	Hum Mol Genet	Prostate cancer	Other	9e-06	1.2	[1.11-1.32]	rs6983267-G	chr8	128482487	G/T	0.487	NA	0.5288	0.506	Yes	-
	1324	18264097	Eeles RA	Nat Genet	Prostate cancer	Other	9e-13	1.42	[NR]	rs6983267-G	chr8	128482487	G/T	0.487	0.49	0.5288	0.506	Yes	-
	1325	18264096	Thomas G	Nat Genet	Prostate cancer	Other	7e-12	1.28	[1.15-1.45]	rs6983267-G	chr8	128482487	G/T	0.487	0.53	0.5288	0.506	Yes	-
	1326	17401363	Yeager M	Nat Genet	Prostate cancer	Other	9e-13	1.26	[1.13-1.41]	rs6983267-G	chr8	128482487	G/T	0.487	0.5	0.5288	0.506	Yes	-
	1327	21743057	Schumacher FR	Hum Mol Genet	Prostate cancer	Other	9e-09	1.31	[1.20-1.44]	rs7130881-G	chr11	68752534	A/G	0.19	NA	0.1064	0.064	Yes	-
	1328	19767753	Eeles RA	Nat Genet	Prostate cancer	Other	8e-13	NR	NR	rs7130881-G	chr11	68752534	A/G	0.19	NA	0.1064	0.064	Yes	-
	1329	21743057	Schumacher FR	Hum Mol Genet	Prostate cancer	Other	6e-06	1.16	[1.01-1.23]	rs742134-G	chr22	41848219	A/G	0.881	NA	0.8276	0.864	Yes	-
	1330	21743057	Schumacher FR	Hum Mol Genet	Prostate cancer	Other	1e-07	1.06	[1.04-1.09]	rs7629490-T	chr3	87324187	C/T	0.33	NA	0.3423	0.369	Yes	-
	1331	21743057	Schumacher FR	Hum Mol Genet	Prostate cancer	Other	5e-09	1.17	[1.11-1.24]	rs902774-A	chr12	51560171	A/G	0.142	0.17	0.02797	0	Yes	-
	1332	20802025	Tang W	Blood	Protein C levels	Other	7e-37	0.14	[0.12-0.16] ug/ml decrease	rs6120849-T	chr20	33194048	C/T	0.212	0.23	0.2966	0.25	Yes	-
	1333	20802025	Tang W	Blood	Protein C levels	Other	2e-200	0.47	[0.44-0.50] ug/ml increase	rs867186-C	chr20	33228215	A/G	0.097	0.1	0.1793	0.148	Yes	-
	1334	19169254	Nair RP	Nat Genet	Psoriasis	Other	6e-06	1.09	[NR]	rs1076160-T	chr9	134765855	C/T	0.5	0.48	0.4759	0.597	Yes	-
	1335	19169254	Nair RP	Nat Genet	Psoriasis	Other	1e-100	2.64	[NR]	rs12191877-T	chr6	31360904	C/T	0.133	0.15	0.1562	0.312	Yes	-
	1336	20953190	Strange A	Nat Genet	Psoriasis	Other	1e-13	1.29	[1.17-1.43]	rs17716942-A	chr2	162968937	C/T	0.805	0.86	0.8966	0.949	Yes	-
	1337	19169254	Nair RP	Nat Genet	Psoriasis	Other	1e-20	1.59	[NR]	rs17728338-A	chr5	150458511	A/G	0.08	0.054	0.07746	0.11	Yes	-
	1338	19169254	Nair RP	Nat Genet	Psoriasis	Other	5e-15	1.27	[NR]	rs20541-G	chr5	132023863	A/G	0.783	0.79	0.6842	0.79	Yes	-
	1339	19169254	Nair RP	Nat Genet	Psoriasis	Other	2e-28	1.44	[NR]	rs2082412-G	chr5	158650367	A/G	0.805	0.8	0.7257	0.665	Yes	-
	1340	19169254	Nair RP	Nat Genet	Psoriasis	Other	3e-08	1.13	[NR]	rs2201841-G	chr1	67466790	A/G	0.296	0.3	0.3741	0.614	Yes	-
	1341	20953188	Ellinghaus E	Nat Genet	Psoriasis	Other	1e-20	1.54	[1.32-1.79] (Panel A)	rs2546890-A	chr5	158692478	A/G	0.562	0.56	0.6285	0.58	Yes	-
	1342	19169255	Zhang XJ	Nat Genet	Psoriasis	Other	3e-26	1.28	[1.23-1.35]	rs3213094-A	chr5	158683347	C/T	0.19	0.45	0.2878	0.33	Yes	-
	1343	20953189	Stuart PE	Nat Genet	Psoriasis	Other	4e-11	1.19	[NR]	rs4795067-G	chr17	23130802	A/G	0.323	0.35	0.2872	0.477	Yes	-
	1344	20953190	Strange A	Nat Genet	Psoriasis	Other	4e-09	1.12	[1.04-1.20]	rs702873-G	chr2	60935046	C/T	0.571	0.56	0.6276	0.773	Yes	-
	1345	20932310	Han MR	BMC Neurol	P-tau181p	Other	1e-07	NR	NR	rs7558386-G	chr2	227270383	A/G	0.372	NA	0.2986	0.352	Yes	-
	1346	21946350	Artigas MS	Nat Genet	Pulmonary function	Other	2e-07	0.03	[0.015-0.035] unit increase	rs12716852-G	chr16	76746239	A/G	0.513	NA	0.4065	0.557	Yes	-
	1347	21946350	Soler Artigas M	Nat Genet	Pulmonary function	Other	2e-08	0.03	[0.021-0.041] unit decrease	rs153916-T	chr5	95062456	C/T	0.531	0.55	0.6007	0.636	Yes	-
	1348	21946350	Soler Artigas M	Nat Genet	Pulmonary function	Other	2e-06	0.03	[0.014-0.038] unit increase	rs1551943-G	chr5	52230790	A/G	0.717	NA	0.773	0.659	Yes	-
	1349	21946350	Soler Artigas M	Nat Genet	Pulmonary function	Other	2e-07	0.03	[0.018-0.038] unit increase	rs1928168-T	chr6	22125717	C/T	0.495	NA	0.7431	0.511	Yes	-
	1350	20010835	Hancock DB	Nat Genet	Pulmonary function	Other	3e-20	0.52	[NR] % increase	rs1980057-T	chr4	145705188	C/T	0.389	0.4	0.4828	0.472	Yes	-
	1351	21946350	Soler Artigas M	Nat Genet	Pulmonary function	Other	9e-06	0.03	[0.014-0.038] unit decrease	rs2544527-T	chr2	15843619	C/T	0.292	NA	0.3916	0.295	Yes	-
	1352	21946350	Artigas MS	Nat Genet	Pulmonary function	Other	5e-06	0.03	[0.018-0.042] unit decrease	rs2798641-T	chr6	109374743	C/T	0.159	0.18	0.1449	0.148	Yes	-
	1353	21946350	Soler Artigas M	Nat Genet	Pulmonary function	Other	8e-09	0.04	[0.027-0.055] unit decrease	rs2798641-T	chr6	109374743	C/T	0.159	0.18	0.1449	0.148	Yes	-
	1354	21946350	Soler Artigas M	Nat Genet	Pulmonary function	Other	2e-10	0.04	[0.025-0.049] unit increase	rs2857595-G	chr6	31676448	A/G	0.821	0.81	0.8696	0.886	Yes	-
	1355	21946350	Artigas MS	Nat Genet	Pulmonary function	Other	4e-06	0.06	[0.031-0.079] unit decrease	rs3734729-G	chr6	150612560	A/G	0.04	NA	0.04138	0.045	Yes	-
	1356	20010834	Repapi E	Nat Genet	Pulmonary function	Other	4e-09	0.07	[NR] % variance explained	rs3995090-C	chr5	147826008	A/C	0.372	0.41	0.4384	0.352	Yes	-
	1357	21946350	Soler Artigas M	Nat Genet	Pulmonary function	Other	8e-06	0.03	[0.015-0.039] unit decrease	rs4762767-G	chr12	19757396	A/G	0.748	NA	0.8207	0.879	Yes	-
	1358	21946350	Artigas MS	Nat Genet	Pulmonary function	Other	3e-12	0.03	[0.021-0.037] unit increase	rs7068966-T	chr10	12317998	C/T	0.46	0.52	0.5071	0.472	Yes	-
	1359	21946350	Soler Artigas M	Nat Genet	Pulmonary function	Other	6e-13	0.03	[0.023-0.043] unit increase	rs7068966-T	chr10	12317998	C/T	0.46	0.52	0.5071	0.472	Yes	-
	1360	19300500	Wilk JB	PLoS Genet	Pulmonary function measures	Other	8e-11	0.1	[NR] % increase in FEV1/FVC ratio	rs13147758-G	chr4	145679680	A/G	0.385	0.39	0.4896	0.477	Yes	-
	1361	20031603	Marroni F	Circ Cardiovasc Genet	QT interval	Other	2e-06	0.26	[0.16-0.36] unit decrease	rs10488031-A	chr7	37043379	A/G	0.071	0.07	0.07986	0.04	Yes	-
	1362	20031603	Marroni F	Circ Cardiovasc Genet	QT interval	Other	8e-07	0.28	[0.16-0.40] unit increase	rs4318720-A	chr4	118551703	A/G	0.111	0.09	0.1514	0.193	Yes	-
	1363	19305409	Pfeufer A	Nat Genet	QT interval	Other	7e-33	2.19	[1.76-2.62] ms increase	rs4657178-T	chr1	160477234	C/T	0.257	0.33	0.4201	0.477	Yes	-
	1364	20031603	Marroni F	Circ Cardiovasc Genet	QT interval	Other	7e-07	0.19	[0.11-0.27] unit increase	rs6845865-G	chr4	149194052	C/T	0.133	0.21	0.1655	0.267	Yes	-
	1365	19197348	Lowe JK	PLoS Genet	Quantitative traits	Other	5e-06	0.21	[NR] mg/L increase	rs1039302-T	chr12	119720641	C/T	0.164	0.36	0.1897	0.29	Yes	-
	1366	19197348	Lowe JK	PLoS Genet	Quantitative traits	Other	3e-06	0.44	[NR] inch decrease	rs10486715-A	chr7	41445133	A/G	0.027	0.07	0.01736	0	Yes	-
	1367	19197348	Lowe JK	PLoS Genet	Quantitative traits	Other	9e-06	0.23	[NR] mg/dL increase	rs10498712-G	chr6	22851382	A/G	0.375	0.25	0.2388	0.295	Yes	-
	1368	19197348	Lowe JK	PLoS Genet	Quantitative traits	Other	6e-06	0.18	[NR] mm Hg decrease	rs10508517-A	chr10	17037897	A/G	0.951	0.43	0.8586	0.847	Yes	-
	1369	19197348	Lowe JK	PLoS Genet	Quantitative traits	Hypertriglyceridemia	7e-06	0.19	[NR] mg/dL increase	rs10518224-A	chr4	80783532	A/G	0.283	0.23	0.2361	0.125	Yes	-
	1370	19197348	Lowe JK	PLoS Genet	Quantitative traits	Other	2e-06	0.29	[NR] mIU/L decrease	rs10848704-C	chr12	2752805	C/T	0.248	0.35	0.2759	0.324	Yes	-
	1371	19197348	Lowe JK	PLoS Genet	Quantitative traits	Obesity	4e-06	0.36	[NR] lb. decrease	rs10928195-C	chr2	144145078	C/G	0.097	NonEuro	0.1621	0.949	Yes	-
	1372	19197348	Lowe JK	PLoS Genet	Quantitative traits	Other	5e-06	0.26	[NR] mg/L increase	rs11066587-G	chr12	112464039	C/G	0.031	0.16	0.02098	0.134	Yes	-
	1373	19197348	Lowe JK	PLoS Genet	Quantitative traits	Other	9e-06	0.18	[NR] mg/dL decrease	rs17157663-A	chr7	8965501	A/G	0.19	0.32	0.2034	0.335	Yes	-
	1374	19197348	Lowe JK	PLoS Genet	Quantitative traits	Obesity	9e-06	0.22	[NR] lb. increase	rs1874326-G	chr7	137807930	A/G	0.845	NonEuro	0.6875	0.648	Yes	-
	1375	19197348	Lowe JK	PLoS Genet	Quantitative traits	Obesity	8e-07	0.22	[NR] inch decrease	rs2222328-C	chr3	160741985	C/T	0.199	NonEuro	0.1138	0.562	Yes	-
	1376	19197348	Lowe JK	PLoS Genet	Quantitative traits	Obesity	3e-06	0.21	[NR] lb. decrease	rs2225614-C	chr9	24101280	A/C	0.836	NonEuro	0.8272	0.165	Yes	-
	1377	19197348	Lowe JK	PLoS Genet	Quantitative traits	Other	3e-06	0.27	[NR] mm Hg decrease	rs2527866-C	chr7	156783057	A/C	0.261	0.23	0.3697	0.471	Yes	-
	1378	19197348	Lowe JK	PLoS Genet	Quantitative traits	Other	6e-06	0.58	[NR] mm Hg decrease	rs254893-A	chr5	171008832	A/G	0.692	0.06	0.7359	0	Yes	-
	1379	19197348	Lowe JK	PLoS Genet	Quantitative traits	Other	6e-06	0.19	[NR] mg/dL increase	rs3846663-T	chr5	74691482	C/T	0.394	0.39	0.4	0.591	Yes	-
	1380	19197348	Lowe JK	PLoS Genet	Quantitative traits	Other	1e-06	0.21	[NR] mg/dL increase	rs3846663-T	chr5	74691482	C/T	0.394	0.39	0.4	0.591	Yes	-
	1381	19197348	Lowe JK	PLoS Genet	Quantitative traits	Hypertriglyceridemia	5e-06	0.22	[NR] mg/dL increase	rs4420638-G	chr19	50114786	A/G	0.183	0.21	0.2345	0.057	Yes	-
	1382	19197348	Lowe JK	PLoS Genet	Quantitative traits	Other	3e-07	0.28	[NR] mg/dL increase	rs4420638-G	chr19	50114786	A/G	0.183	0.21	0.2345	0.057	Yes	-
	1383	19197348	Lowe JK	PLoS Genet	Quantitative traits	Other	2e-06	0.28	[NR] mg/L decrease	rs4420638-G	chr19	50114786	A/G	0.183	0.21	0.2345	0.057	Yes	-
	1384	19197348	Lowe JK	PLoS Genet	Quantitative traits	Obesity	2e-06	0.85	[NR] % increase	rs6066084-A	chr20	44893730	A/G	0.69	NonEuro	0.451	0.29	Yes	-
	1385	19197348	Lowe JK	PLoS Genet	Quantitative traits	Other	1e-06	0.36	[NR] mIU/L decrease	rs6462411-C	chr7	3882090	C/T	0.155	0.2	0.2289	0.256	Yes	-
	1386	19197348	Lowe JK	PLoS Genet	Quantitative traits	Other	5e-06	0.23	[NR] mg/dL increase	rs655601-A	chr5	180159279	A/C	0.898	0.47	0.5868	0.812	Yes	-
	1387	19197348	Lowe JK	PLoS Genet	Quantitative traits	Obesity	8e-06	0.34	[NR] % decrease	rs6560749-T	chr10	1666531	G/T	0.022	NonEuro	0.05208	0.966	No	Duplicated
	1388	19197348	Lowe JK	PLoS Genet	Quantitative traits	Obesity	2e-06	0.32	[NR] kg/m2 decrease	rs6560749-T	chr10	1666531	G/T	0.022	NonEuro	0.05208	0.966	Yes	-
	1389	19197348	Lowe JK	PLoS Genet	Quantitative traits	Other	8e-06	0.49	[NR] mIU/L decrease	rs6909430-G	chr6	98846495	A/G	0.168	0.08	0.1034	0.08	Yes	-
	1390	19197348	Lowe JK	PLoS Genet	Quantitative traits	Other	1e-06	0.19	[NR] mm Hg increase	rs7069923-C	chr10	18770374	C/T	0.652	0.49	0.6448	0.741	Yes	-
	1391	19197348	Lowe JK	PLoS Genet	Quantitative traits	Hypertriglyceridemia	1e-09	0.23	[NR] mg/dL increase	rs7396835-T	chr11	116189238	C/T	0.099	NonEuro	0.2138	0.347	No	LD to rs964184
	1392	19197348	Lowe JK	PLoS Genet	Quantitative traits	Other	6e-06	0.22	[NR] mg/L decrease]	rs7561273-A	chr2	24101018	A/G	0.5	0.35	0.3681	0.591	Yes	-
	1393	19197348	Lowe JK	PLoS Genet	Quantitative traits	Other	6e-06	0.35	[NR] mg/dL decrease	rs7895372-G	chr10	15759627	C/G	0	0.04	0	0	Yes	-
	1394	19430482	Kottgen A	Nat Genet	Renal function and chronic kidney disease	Other	1e-12	0.01	[0.008-0.016] ml/min/1.73m2 decrease	rs17319721-A	chr4	77587871	A/G	0.42	0.44	0.3169	0.126	Yes	-
	1395	22044751	Foster MC	BMC Med Genet	Renal sinus fat	Other	6e-06	0.31	[0.18-0.45] unit decrease	rs1572050-A	chr13	93668766	A/G	0.071	0.1	0.04483	0.097	Yes	-
	1396	22044751	Foster MC	BMC Med Genet	Renal sinus fat	Other	3e-06	0.18	[0.11-0.26] unit decrease	rs580140-G	chr21	31739378	A/G	0.296	0.28	0.3152	0.335	Yes	-
	1397	22044751	Foster MC	BMC Med Genet	Renal sinus fat	Other	6e-06	0.16	[0.089-0.227] unit increase	rs9375674-A	chr6	130258203	A/G	0.447	0.46	0.537	0.625	Yes	-
	1398	22041458	Clark SL	Psychol Med	Response to antidepressant treatment	Other	2e-07	NR	NR	rs10517287-T	chr4	33301097	G/T	0.049	0.11	0.1181	0.148	Yes	-
	1399	22041458	Clark SL	Psychol Med	Response to antidepressant treatment	Other	2e-07	NR	NR	rs10857636-T	chr10	49655116	C/T	0.071	0.06	0.1	0.04	Yes	-
	1400	22041458	Clark SL	Psychol Med	Response to antidepressant treatment	Other	3e-06	NR	NR	rs10988449-T	chr9	131410181	C/T	0.128	0.17	0.1519	0.057	Yes	-
	1401	22041458	Clark SL	Psychol Med	Response to antidepressant treatment	Other	2e-07	NR	NR	rs11949289-T	chr5	28375930	A/G	0.527	0.42	0.4375	0.341	Yes	-
	1402	22041458	Clark SL	Psychol Med	Response to antidepressant treatment	Other	2e-06	NR	NR	rs12157904-G	chr22	36311958	A/C	0.022	0.07	0.02069	0.046	Yes	-
	1403	22041458	Clark SL	Psychol Med	Response to antidepressant treatment	Other	9e-08	NR	NR	rs13432159-G	chr2	67827391	G/T	0.08	0.08	0.03448	0.051	Yes	-
	1404	22041458	Clark SL	Psychol Med	Response to antidepressant treatment	Other	7e-07	NR	NR	rs16861531-G	chr2	14315503	C/G	0.996	0.03	1	0	Yes	-
	1405	22041458	Clark SL	Psychol Med	Response to antidepressant treatment	Other	3e-06	NR	NR	rs17150687-C	chr7	77881227	A/G	0	0.02	0	0	Yes	-
	1406	22041458	Clark SL	Psychol Med	Response to antidepressant treatment	Other	4e-07	NR	NR	rs17647114-T	chr15	85237749	A/G	0.023	0.03	0.02256	0	Yes	-
	1407	22041458	Clark SL	Psychol Med	Response to antidepressant treatment	Other	3e-07	NR	NR	rs17766217-A	chr8	128573679	C/T	0.615	0.01	0.6586	0.609	Yes	-
	1408	22041458	Clark SL	Psychol Med	Response to antidepressant treatment	Other	2e-06	NR	NR	rs2034588-G	chr16	8269328	C/T	0	0.02	0.006944	0	Yes	-
	1409	22041458	Clark SL	Psychol Med	Response to antidepressant treatment	Other	3e-06	NR	NR	rs2163287-A	chr6	157961271	A/G	0	0.02	0	0	Yes	-
	1410	22041458	Clark SL	Psychol Med	Response to antidepressant treatment	Other	5e-07	NR	NR	rs2742417-T	chr3	45706455	C/T	0.496	0.49	0.4097	0.301	Yes	-
	1411	22041458	Clark SL	Psychol Med	Response to antidepressant treatment	Other	2e-06	NR	NR	rs491376-C	chr4	12725860	C/G	1	0.01	1	0	Yes	-
	1412	22041458	Clark SL	Psychol Med	Response to antidepressant treatment	Other	4e-07	NR	NR	rs527430-G	chr1	47691408	A/G	0.987	0.39	1	0	Yes	-
	1413	22041458	Clark SL	Psychol Med	Response to antidepressant treatment	Other	1e-06	NR	NR	rs573332-G	chr4	12731633	C/T	0	0.11	0	0	Yes	-
	1414	22041458	Clark SL	Psychol Med	Response to antidepressant treatment	Other	4e-07	NR	NR	rs6724422-T	chr2	67830292	C/T	0.062	0.06	0.02414	0.017	Yes	-
	1415	22041458	Clark SL	Psychol Med	Response to antidepressant treatment	Other	2e-06	NR	NR	rs6795349-G	chr3	147477	A/G	0	0.03	0	0	Yes	-
	1416	22041458	Clark SL	Psychol Med	Response to antidepressant treatment	Other	1e-06	NR	NR	rs7015622-C	chr8	84066369	A/G	0	0.01	0	0	Yes	-
	1417	22041458	Clark SL	Psychol Med	Response to antidepressant treatment	Other	3e-07	NR	NR	rs7136572-G	chr12	94483919	A/G	0.004	0.04	0.02414	0.017	Yes	-
	1418	22041458	Clark SL	Psychol Med	Response to antidepressant treatment	Other	5e-07	NR	NR	rs8039808-A	chr15	47727138	C/T	0.013	0.06	0.02069	0.029	Yes	-
	1419	21659360	Wade R	Haematologica	Response to antineoplastic agents	Other	5e-06	2.27	[0.31-0.63]	rs1168987-A	chr14	35467431	C/T	0.073	NA	0.1414	0.188	Yes	-
	1420	21659360	Wade R	Haematologica	Response to antineoplastic agents	Other	8e-07	2.36	[1.60-3.47]	rs1949733-A	chr4	8554259	A/G	0.292	NA	0.3741	0.159	Yes	-
	1421	21659360	Wade R	Haematologica	Response to antineoplastic agents	Other	7e-06	2.11	[1.51-2.94]	rs6785504-T	chr3	154155469	G/T	0.456	NA	0.4071	0.46	Yes	-
	1422	19680635	Alkelai A	Psychopharmacology (Berl)	Response to antipsychotic treatment	Other	3e-06	3.21	[1.97-5.25]	rs12476047-C	chr2	164026122	C/T	0.341	NA	0.3102	0.171	Yes	-
	1423	22142827	Innocenti F	Clin Cancer Res	Response to gemcitabine in pancreatic cancer	Other	3e-08	3.3	[2.10-5.10]	rs763780-G	chr6	52209698	C/T	0.049	NA	0.07639	0.08	Yes	-
	1424	22095909	Lange CM	Hepatology	Response to hepatitis C treatment	Other	5e-06	0.26	[0.15-0.37] ug/L decrease	rs11242704-G	chr6	1480997	A/G	0.319	NA	0.3276	0.335	Yes	-
	1425	21659334	Tanaka Y	Hum Mol Genet	Response to hepatitis C treatment	Other	9e-25	33.33	[12.50-100]	rs11697186-A	chr20	3133123	A/T	0.929	0.85	0.94718	0.874	Yes	-
	1426	21659334	Tanaka Y	Hum Mol Genet	Response to hepatitis C treatment	Other	5e-17	4.5	[3.10-6.50]	rs11697186-T	chr20	3133123	A/T	0.071	0.15	0.05282	0.126	Yes	-
	1427	21659334	Tanaka Y	Hum Mol Genet	Response to hepatitis C treatment	Other	2e-25	25	[11.11-50.0]	rs6139030-T	chr20	3135733	C/T	0.929	0.83	0.94483	0.881	Yes	-
	1428	21659334	Tanaka Y	Hum Mol Genet	Response to hepatitis C treatment	Other	1e-15	3.9	[2.80-5.50]	rs6139030-C	chr20	3135733	C/T	0.071	0.17	0.05517	0.119	Yes	-
	1429	21228123	Ochi H	J Gen Virol	Response to hepatitis C treatment	Other	1e-20	3	[2.4-3.8]	rs8099917-G	chr19	44435005	G/T	0.15	0.083	0.3403	0.182	Yes	-
	1430	19749758	Suppiah V	Nat Genet	Response to hepatitis C treatment	Other	9e-09	1.98	[1.57-2.52]	rs8099917-G	chr19	44435005	G/T	0.15	NA	0.3403	0.182	Yes	-
	1431	19749757	Tanaka Y	Nat Genet	Response to hepatitis C treatment	Other	3e-32	27.1	[14.6-50.3]	rs8099917-G	chr19	44435005	G/T	0.15	0.12	0.3403	0.182	Yes	-
	1432	18521091	Volpi S	Mol Psychiatry	Response to iloperidone treatment (QT prolongation)	Other	3e-06	NR	NR	rs17054392-C	chr4	169766833	C/T	0	NA	0.003448	0	Yes	-
	1433	18521091	Volpi S	Mol Psychiatry	Response to iloperidone treatment (QT prolongation)	Other	2e-06	NR	NR	rs3924426-T	chr15	90246877	C/T	1	NA	0.98966	0.903	Yes	-
	1434	18521091	Volpi S	Mol Psychiatry	Response to iloperidone treatment (QT prolongation)	Other	3e-06	NR	NR	rs4799915-T	chr18	33182637	C/T	0.637	NA	0.5468	0.614	Yes	-
	1435	18521091	Volpi S	Mol Psychiatry	Response to iloperidone treatment (QT prolongation)	Other	2e-06	NR	NR	rs4933824-T	chr10	83809105	G/T	0.035	NA	0.03125	0	Yes	-
	1436	18521091	Volpi S	Mol Psychiatry	Response to iloperidone treatment (QT prolongation)	Other	3e-06	NR	NR	rs993648-T	chr2	182164239	C/T	0.257	NA	0.135	0.176	Yes	-
	1437	21845381	Florez JC	Curr Diab Rep	Response to metformin	Other	3e-09	NR	NR	rs11212617-A	chr11	107788371	A/C	0.535	0.44	0.5909	0.648	Yes	-
	1438	21186350	Zhou K	Nat Genet	Response to metformin	Other	3e-09	1.35	[1.22-1.49]	rs11212617-C	chr11	107788371	A/C	0.465	0.44	0.4091	0.352	Yes	-
	1439	20339536	Barber MJ	PLoS One	Response to statin therapy	Other	6e-06	NR	NR	rs10221833-C	chr2	165285410	C/G	0.128	0.09	0.09655	0.125	Yes	-
	1440	20339536	Barber MJ	PLoS One	Response to statin therapy	Other	8e-06	NR	NR	rs11641231-G	chr16	84938685	C/G	0.208	0.23	0.3517	0.301	Yes	-
	1441	20339536	Barber MJ	PLoS One	Response to statin therapy	Other	2e-07	NR	NR	rs1431005-A	chr4	188582362	A/G	0.351	0.4	0.4143	0.369	Yes	-
	1442	20339536	Barber MJ	PLoS One	Response to statin therapy	Other	1e-06	NR	NR	rs16909449-C	chr9	121901118	C/T	0.239	0.25	0.06897	0.085	Yes	-
	1443	20339536	Barber MJ	PLoS One	Response to statin therapy	Other	3e-06	NR	NR	rs174583-T	chr11	61366326	C/T	0.35	0.34	0.3021	0.097	Yes	-
	1444	18650507	Link E	N Engl J Med	Response to statin therapy	Other	2e-09	4.5	[2.60-7.70]	rs4149056-C	chr12	21222816	C/T	0.15	0.13	0.1458	0.023	Yes	-
	1445	20339536	Barber MJ	PLoS One	Response to statin therapy	Other	2e-08	NR	NR	rs8014194-A	chr14	94790431	A/T	0.198	0.24	0.25	0.291	Yes	-
	1446	18615156	Liu C	Mol Med	Response to TNF antagonist treatment	Other	3e-07	NR	NR	rs10945919-G	chr6	164106667	A/G	0.336	0.32	0.3828	0.295	Yes	-
	1447	18615156	Liu C	Mol Med	Response to TNF antagonist treatment	Other	5e-06	NR	NR	rs983332-A	chr1	87904968	G/T	0.199	0.21	0.2148	0.19	Yes	-
	1448	19176441	Yang JJ	JAMA	Response to treatment for acute lymphoblastic leukemia	Other	9e-07	2.73	[1.52-4.93]	rs1569175-T	chr2	200730199	C/T	0.044	NA	0.06028	0.045	Yes	-
	1449	19176441	Yang JJ	JAMA	Response to treatment for acute lymphoblastic leukemia	Other	9e-07	2.67	[1.53-4.68]	rs17007695-C	chr4	142929173	C/T	0.062	NA	0.08276	0.182	Yes	-
	1450	19176441	Yang JJ	JAMA	Response to treatment for acute lymphoblastic leukemia	Other	7e-06	3.23	[1.52-6.87]	rs267759-A	chr5	36173377	A/G	0.004	NA	0.01034	0.023	Yes	-
	1451	19176441	Yang JJ	JAMA	Response to treatment for acute lymphoblastic leukemia	Other	4e-06	4.66	[1.58-13.7]	rs2901286-A	chr10	122890613	A/C	0.009	NA	0.006897	0.017	Yes	-
	1452	19176441	Yang JJ	JAMA	Response to treatment for acute lymphoblastic leukemia	Other	5e-06	7.24	[2.46-21.30]	rs35229355-T	chr6	155971493	C/T	0.013	NA	0.09655	0.062	Yes	-
	1453	19176441	Yang JJ	JAMA	Response to treatment for acute lymphoblastic leukemia	Other	9e-08	3.91	[1.52-10.10]	rs359312-T	chr10	17428149	C/T	0	NA	0.003448	0	Yes	-
	1454	19176441	Yang JJ	JAMA	Response to treatment for acute lymphoblastic leukemia	Other	3e-06	3.01	[1.50-6.03]	rs4723619-C	chr7	37232877	C/T	0.036	NA	0.125	0.085	Yes	-
	1455	19176441	Yang JJ	JAMA	Response to treatment for acute lymphoblastic leukemia	Other	2e-06	2.73	[1.08-6.88]	rs6125048-T	chr20	45642012	G/T	0	NA	0.03472	0.092	Yes	-
	1456	19176441	Yang JJ	JAMA	Response to treatment for acute lymphoblastic leukemia	Other	3e-06	13.91	[2.72-70.92]	rs6971925-T	chr7	14412442	C/T	0	NA	0	0.029	Yes	-
	1457	19176441	Yang JJ	JAMA	Response to treatment for acute lymphoblastic leukemia	Other	5e-06	13.9	[2.72-71.1]	rs7128311-C	chr11	20519095	C/T	0	NA	0.006897	0.062	Yes	-
	1458	20639392	Eijgelsheim M	Hum Mol Genet	Resting heart rate	Other	2e-09	6.2	[4.22-8.18] ms decrease	rs174547-C	chr11	61327359	C/T	0.344	0.33	0.2793	0.098	Yes	-
	1459	20639392	Eijgelsheim M	Hum Mol Genet	Resting heart rate	Other	3e-08	7.4	[4.85-9.95] ms decrease	rs223116-A	chr14	23046850	A/G	0.223	0.24	0.4613	0.33	Yes	-
	1460	20639392	Eijgelsheim M	Hum Mol Genet	Resting heart rate	Other	7e-08	5.4	[3.48-7.32] ms increase	rs2745967-G	chr1	206195345	A/G	0.482	0.37	0.2188	0.17	Yes	-
	1461	20639392	Eijgelsheim M	Hum Mol Genet	Resting heart rate	Other	4e-10	6.3	[4.36-8.24] ms decrease	rs281868-G	chr6	118680754	A/G	0.438	0.5	0.4861	0.483	Yes	-
	1462	21779176	Winkelmann J	PLoS Genet	Restless legs syndrome	Other	1e-22	1.41	[1.32-1.52]	rs12593813-G	chr15	65823906	A/G	0.705	0.68	0.7	0.523	Yes	-
	1463	17637780	Winkelmann J	Nat Genet	Restless legs syndrome	Other	1e-15	1.5	[1.36-1.66]	rs12593813-G	chr15	65823906	A/G	0.705	0.67	0.7	0.523	Yes	-
	1464	21779176	Winkelmann J	PLoS Genet	Restless legs syndrome	Other	3e-10	1.29	[1.19-1.40]	rs1975197-A	chr9	8836955	A/G	0.19	0.16	0.2	0.193	Yes	-
	1465	18660810	Schormair B	Nat Genet	Restless legs syndrome	Other	6e-09	1.31	[1.20-1.44]	rs1975197-T	chr9	8836955	A/G	0.19	0.16	0.2	0.193	Yes	-
	1466	21779176	Winkelmann J	PLoS Genet	Restless legs syndrome	Other	3e-49	1.68	[1.57-1.81]	rs2300478-G	chr2	66634957	G/T	0.237	0.24	0.1949	0.341	Yes	-
	1467	17637780	Winkelmann J	Nat Genet	Restless legs syndrome	Other	3e-28	1.74	[1.57-1.92]	rs2300478-G	chr2	66634957	G/T	0.237	0.24	0.1949	0.341	Yes	-
	1468	21779176	Winkelmann J	PLoS Genet	Restless legs syndrome	Other	9e-19	1.35	[1.27-1.43]	rs3104767-G	chr16	51182239	G/T	0.602	0.58	0.5211	0.483	Yes	-
	1469	18660810	Schormair B	Nat Genet	Restless legs syndrome	Other	6e-10	1.44	[1.31-1.59]	rs4626664-A	chr9	9251737	A/G	0.127	0.12	0.153	0.233	Yes	-
	1470	21779176	Winkelmann J	PLoS Genet	Restless legs syndrome	Other	9e-11	1.23	[1.16-1.31]	rs6747972-A	chr2	67923729	A/G	0.398	0.44	0.531	0.381	Yes	-
	1471	17637780	Winkelmann J	Nat Genet	Restless legs syndrome	Other	4e-18	1.67	[1.49-1.89]	rs9296249-T	chr6	38473819	C/T	0.77	0.76	0.669	0.608	Yes	-
	1472	21779176	Winkelmann J	PLoS Genet	Restless legs syndrome	Other	8e-22	1.47	[1.35-1.47]	rs9357271-T	chr6	38473851	C/T	0.765	0.76	0.6276	0.369	Yes	-
	1473	21060863	Ikram MK	PLoS Genet	Retinal vascular caliber	Other	4e-07	1	[0.61-1.39] um increase	rs7824557-G	chr8	11141521	A/G	0.372	0.39	0.3517	0.443	Yes	-
	1474	20453842	Stahl EA	Nat Genet	Rheumatoid arthritis	Other	4e-06	1.11	[NR]	rs11203203-A	chr21	42709255	A/G	0.323	0.37	0.369	0.341	Yes	-
	1475	17554300	WTCCC	Nature	Rheumatoid arthritis	Other	4e-07	1.32	[NR] (women)	rs11761231-C	chr7	131020579	C/T	0.593	0.62	0.5862	0.523	Yes	-
	1476	20453842	Stahl EA	Nat Genet	Rheumatoid arthritis	Other	5e-08	1.29	[NR]	rs13315591-C	chr3	58531881	C/T	0.093	0.09	0.02431	0.023	Yes	-
	1477	18794853	Raychaudhuri S	Nat Genet	Rheumatoid arthritis	Other	9e-08	1.12	[NR]	rs1678542-C	chr12	56254982	C/G	0.606	0.37	0.5172	0.443	Yes	-
	1478	19503088	Gregersen PK	Nat Genet	Rheumatoid arthritis	Other	6e-09	1.17	[1.11-1.23]	rs231735-T	chr2	204402121	G/T	0.491	0.51	0.4126	0.318	Yes	-
	1479	19503088	Gregersen PK	Nat Genet	Rheumatoid arthritis	Other	6e-09	1.19	[1.13-1.27]	rs2736340-A	chr8	11381382	C/T	0.239	0.24	0.1862	0.318	Yes	-
	1480	20453842	Stahl EA	Nat Genet	Rheumatoid arthritis	Other	9e-07	1.1	[NR]	rs2872507-A	chr17	35294289	A/G	0.473	0.47	0.4655	0.33	Yes	-
	1481	20453842	Stahl EA	Nat Genet	Rheumatoid arthritis	Other	1e-08	1.15	[1.10-1.20]	rs3087243-G	chr2	204447164	A/G	0.54	0.56	0.412	0.347	Yes	-
	1482	20453841	Kochi Y	Nat Genet	Rheumatoid arthritis	Other	8e-19	1.19	[1.15-1.24]	rs3093024-T	chr6	167452783	A/G	0.407	0.46	0.5964	0.449	Yes	-
	1483	17554300	WTCCC	Nature	Rheumatoid arthritis	Other	9e-06	1.09	[0.96-1.25]	rs3816587-C	chr4	25026342	C/T	0.424	0.41	0.469	0.574	Yes	-
	1484	20453842	Stahl EA	Nat Genet	Rheumatoid arthritis	Other	4e-06	1.12	[1.06-1.18]	rs3890745-T	chr1	2543484	C/T	0.668	0.68	0.7552	0.591	Yes	-
	1485	18794853	Raychaudhuri S	Nat Genet	Rheumatoid arthritis	Other	1e-07	1.12	[NR]	rs3890745-T	chr1	2543484	C/T	0.668	0.67	0.7552	0.591	Yes	-
	1486	18794853	Raychaudhuri S	Nat Genet	Rheumatoid arthritis	Other	4e-06	1.11	[NR]	rs42041-G	chr7	92084680	C/G	0.314	0.24	0.1444	0.108	Yes	-
	1487	20453842	Stahl EA	Nat Genet	Rheumatoid arthritis	Other	2e-06	1.15	[1.09-1.22]	rs4750316-G	chr10	6433266	C/G	0.832	0.81	0.7655	0.79	Yes	-
	1488	18794853	Raychaudhuri S	Nat Genet	Rheumatoid arthritis	Other	4e-06	1.14	[NR]	rs4750316-G	chr10	6433266	C/G	0.832	0.2	0.7655	0.79	Yes	-
	1489	20453842	Stahl EA	Nat Genet	Rheumatoid arthritis	Other	3e-09	1.18	[1.11-1.25]	rs4810485-T	chr20	44181354	G/T	0.248	0.25	0.3194	0.253	Yes	-
	1490	18794853	Raychaudhuri S	Nat Genet	Rheumatoid arthritis	Other	8e-09	1.15	[NR]	rs4810485-G	chr20	44181354	G/T	0.752	0.75	0.6806	0.747	Yes	-
	1491	17554300	WTCCC	Nature	Rheumatoid arthritis	Other	5e-75	2.36	[1.97-2.84]	rs6457617-T	chr6	32771829	C/T	0.522	0.49	0.3655	0.432	Yes	-
	1492	17554300	WTCCC	Nature	Rheumatoid arthritis	Other	6e-25	1.98	[1.72-2.27]	rs6679677-A	chr1	114105331	A/C	0.115	0.1	0.05903	0.006	Yes	-
	1493	20453842	Stahl EA	Nat Genet	Rheumatoid arthritis	Other	9e-13	1.22	[1.16-1.29]	rs6920220-A	chr6	138048197	A/G	0.165	0.22	0.05435	0.086	Yes	-
	1494	20453842	Stahl EA	Nat Genet	Rheumatoid arthritis	Other	1e-11	1.14	[NR]	rs706778-T	chr10	6138955	C/T	0.403	0.4	0.4897	0.466	Yes	-
	1495	21653640	Eleftherohorinou H	Hum Mol Genet	Rheumatoid arthritis	Other	2e-06	1.19	[1.10-1.30]	rs743777-G	chr22	35881553	A/G	0.296	NA	0.3056	0.176	Yes	-
	1496	17554300	WTCCC	Nature	Rheumatoid arthritis	Other	1e-06	1.09	[0.97-1.24]	rs743777-G	chr22	35881553	A/G	0.296	0.29	0.3056	0.176	Yes	-
	1497	21844665	Hu HJ	Exp Mol Med	Rheumatoid arthritis	Other	3e-10	1.56	[1.36-1.80]	rs805297-A	chr6	31730585	A/C	0.31	0.36	0.3646	0.244	Yes	-
	1498	20453842	Stahl EA	Nat Genet	Rheumatoid arthritis	Other	1e-16	1.14	[NR]	rs874040-C	chr4	25717295	C/G	0.292	0.3	0.2378	0.108	Yes	-
	1499	21653640	Eleftherohorinou H	Hum Mol Genet	Rheumatoid arthritis	Other	5e-109	2.4	[2.20-2.60]	rs9268853-C	chr6	32537621	C/T	0.425	NA	0.191	0.312	Yes	-
	1500	20453842	Stahl EA	Nat Genet	Rheumatoid arthritis	Other	5e-10	1.13	[NR]	rs934734-G	chr2	65449090	A/G	0.442	0.49	0.6207	0.299	Yes	-
	1501	20031603	Marroni F	Circ Cardiovasc Genet	RR interval (heart rate)	Other	1e-06	0.15	[0.09-0.21] unit increase	rs10514995-G	chr5	65775195	C/T	0.367	0.36	0.3517	0.443	Yes	-
	1502	20031603	Marroni F	Circ Cardiovasc Genet	RR interval (heart rate)	Other	2e-06	0.25	[0.15-0.35] unit increase	rs12552736-G	chr9	25439122	C/T	0.102	0.06	0.04483	0.012	Yes	-
	1503	20031603	Marroni F	Circ Cardiovasc Genet	RR interval (heart rate)	Other	4e-06	0.26	[0.14-0.38] unit increase	rs13300284-A	chr9	25442812	A/G	0.069	0.04	0.03793	0.011	Yes	-
	1504	20031603	Marroni F	Circ Cardiovasc Genet	RR interval (heart rate)	Other	3e-06	0.18	[0.10-0.26] unit increase	rs17706439-A	chr1	211922211	A/G	0.15	0.17	0.0979	0.114	Yes	-
	1505	20031603	Marroni F	Circ Cardiovasc Genet	RR interval (heart rate)	Other	1e-06	0.19	[0.11-0.27] unit decrease	rs2717128-G	chr18	73116620	A/G	0.128	0.14	0.1138	0.097	Yes	-
	1506	20031603	Marroni F	Circ Cardiovasc Genet	RR interval (heart rate)	Other	2e-06	0.16	[0.10-0.22] unit increase	rs3743200-A	chr15	77061101	C/T	0.239	0.27	0.2276	0.148	Yes	-
	1507	20031603	Marroni F	Circ Cardiovasc Genet	RR interval (heart rate)	Other	2e-06	0.18	[0.10-0.26] unit decrease	rs4132509-A	chr1	242009707	A/C	0.173	0.21	0.2168	0.188	Yes	-
	1508	20031603	Marroni F	Circ Cardiovasc Genet	RR interval (heart rate)	Other	4e-08	0.17	[0.11-0.23] unit decrease	rs885389-A	chr12	130187715	A/G	0.321	0.3	0.3333	0.364	Yes	-
	1509	22037555	Shi Y	Nat Genet	Schizophrenia	Other	1e-08	1.23	[1.15-1.32]	rs10489202-A	chr1	166169703	G/T	0.243	0.141	0.1285	0.159	Yes	-
	1510	18332876	Kirov G	Mol Psychiatry	Schizophrenia	Other	1e-06	NR	NR	rs11064768-A	chr12	118302892	A/G	0.889	0.91	0.91724	0.898	Yes	-
	1511	21926974	Ripke S	Nat Genet	Schizophrenia	Other	3e-08	1.2	[1.13-1.26]	rs11191580-T	chr10	104896201	C/T	0.925	0.91	0.7448	0.722	Yes	-
	1512	19571808	Stefansson H	Nature	Schizophrenia	Other	2e-09	1.15	[NR]	rs12807809-T	chr11	124111495	C/T	0.823	0.83	0.8542	0.875	Yes	-
	1513	18677311	O'Donovan MC	Nat Genet	Schizophrenia	Other	2e-07	1.12	[NR]	rs1344706-T	chr2	185486673	A/C	0.604	0.59	0.5257	0.716	Yes	-
	1514	19571808	Stefansson H	Nature	Schizophrenia	Other	1e-06	1.09	[NR]	rs1502844-C	chr5	101887216	C/T	0.385	NA	0.4648	0.42	Yes	-
	1515	18677311	O'Donovan MC	Nat Genet	Schizophrenia	Other	3e-06	1.16	[NR]	rs1602565-C	chr11	29118712	C/T	0.094	0.11	0.1119	0.076	Yes	-
	1516	19571811	Purcell SM	Nature	Schizophrenia	Other	1e-07	1.44		rs17594526-T	chr18	51209236	C/T	0.031	0.03	0.03147	0	Yes	-
	1517	20185149	Athanasiu L	J Psychiatr Res	Schizophrenia	Other	3e-06	1.13	[NR]	rs433598-T	chr16	20587707	C/T	0.319	NA	0.4965	0.619	Yes	-
	1518	21682944	Alkelai A	Int J Neuropsychopharmacol	Schizophrenia	Other	1e-07	NR	NR	rs4803480-A	chr19	46758119	A/G	0.22	0.13	0.2014	0.136	Yes	-
	1519	19571811	Purcell SM	Nature	Schizophrenia	Other	1e-07	1.1		rs6782299-T	chr3	182033396	G/T	0.817	0.73	0.6354	0.741	Yes	-
	1520	18677311	O'Donovan MC	Nat Genet	Schizophrenia	Other	6e-06	1.12	[NR]	rs7192086-T	chr16	12969112	A/T	0.248	0.24	0.3094	0.341	Yes	-
	1521	18282107	Shifman S	PLoS Genet	Schizophrenia	Other	9e-07	1.58	[1.31-1.89]	rs7341475-G	chr7	103192051	A/G	0.858	0.62	0.721	0.847	Yes	-
	1522	19571809	Shi J	Nature	Schizophrenia	Other	7e-08	1.14	[NR]	rs9272219-G	chr6	32710247	G/T	0.839	0.72	0.7241	0.822	Yes	-
	1523	20713499	Huang J	Am J Psychiatry	Schizophrenia, bipolar disorder and depression (combined)	Other	2e-06	NR	NR	rs1001021-A	chr22	24733599	A/G	0.049	0.02	0.04167	0.114	Yes	-
	1524	20713499	Huang J	Am J Psychiatry	Schizophrenia, bipolar disorder and depression (combined)	Other	4e-06	NR	NR	rs4982029-A	chr14	32546017	A/G	0.027	0.02	0.03448	0.092	Yes	-
	1525	20713499	Huang J	Am J Psychiatry	Schizophrenia, bipolar disorder and depression (combined)	Other	4e-08	NR	NR	rs6484218-A	chr11	10347157	A/G	0.146	0.14	0.1862	0.244	Yes	-
	1526	20713499	Huang J	Am J Psychiatry	Schizophrenia, bipolar disorder and depression (combined)	Other	3e-06	NR	NR	rs7326068-A	chr13	20107512	A/G	0.173	0.19	0.3496	0.5	Yes	-
	1527	20707712	Mosing MA	Twin Res Hum Genet	Self-rated health	Other	4e-06	0.02	[NR] unit decrease	rs2357266-G	chr2	9841838	A/G	0.717	0.35	0.6036	0.597	Yes	-
	1528	20705733	O'Seaghdha CM	Hum Mol Genet	Serum calcium	Other	6e-06	0.02	[NR] unit decrease	rs6091737-T	chr20	51783299	C/T	0.783	NA	0.569	0.795	Yes	-
	1529	20705733	O'Seaghdha CM	Hum Mol Genet	Serum calcium	Other	8e-06	0.02	[NR] unit decrease	rs9831754-T	chr3	78436281	G/T	0.77	NA	0.8112	0.695	Yes	-
	1530	20383145	Chambers JC	Nat Genet	Serum creatinine	Other	7e-10	1.1	[0.8-1.4] % increase	rs3127573-G	chr6	160601383	A/G	0.115	0.13	0.06552	0.085	Yes	-
	1531	20383145	Chambers JC	Nat Genet	Serum creatinine	Other	3e-10	0.8	[0.6-1.0] % increase	rs8068318-G	chr17	56838548	C/T	0.268	0.27	0.4291	0.517	Yes	-
	1532	21533175	Zhai G	PLoS Genet	Serum dehydroepiandrosterone sulphate levels	Other	2e-11	0.11	[0.07-0.15] umol/L decrease	rs17277546-A	chr7	99327507	A/G	0.049	0.05	0.003472	0.011	Yes	-
	1533	21533175	Zhai G	PLoS Genet	Serum dehydroepiandrosterone sulphate levels	Other	5e-11	0.05	[0.03-0.07 u mol/L increase	rs7181230-G	chr15	38148033	A/G	0.353	0.33	0.3287	0.326	Yes	-
	1534	22075330	Granada M	J Allergy Clin Immunol	Serum IgE levels	Other	1e-07	0.05	[NR] unit increase	rs1801275-G	chr16	27281901	A/G	0.199	NA	0.1517	0.267	Yes	-
	1535	22075330	Granada M	J Allergy Clin Immunol	Serum IgE levels	Other	3e-18	0.08	[NR] unit increase	rs20541-A	chr5	132023863	A/G	0.217	NA	0.3158	0.21	Yes	-
	1536	22075330	Granada M	J Allergy Clin Immunol	Serum IgE levels	Other	2e-06	0.04	[NR] unit decrease	rs9290877-C	chr3	189925174	C/T	0.332	NA	0.4097	0.239	Yes	-
	1537	20700443	Meyer TE	PLoS Genet	Serum magnesium levels	Other	1e-08	0	[0.002-0.006] mmol/L decrease	rs448378-G	chr3	170583593	A/G	0.451	0.47	0.5643	0.449	Yes	-
	1538	19084217	Benyamin B	Am J Hum Genet	Serum markers of iron status	Other	1e-09	0.43	[NR] s.d. increase	rs1830084-A	chr3	134991154	A/T	0.646	0.36	0.6538	0.545	Yes	-
	1539	20031604	Cheng YC	Circ Cardiovasc Genet	Serum matrix metalloproteinase	Other	9e-29	0.39	[NR] unit increase in ln(MMP-1)	rs11225434-C	chr11	102196692	C/T	0.575	0.38	0.4345	0.244	Yes	-
	1540	20031604	Cheng YC	Circ Cardiovasc Genet	Serum matrix metalloproteinase	Other	6e-34	0.44	[NR] unit decrease in ln(MMP-1)	rs495366-A	chr11	102200318	A/G	0.255	0.36	0.4049	0.574	Yes	-
	1541	21909109	Kim YJ	Nat Genet	Serum metabolites	Other	1e-16	0.04	[0.034-0.055] mg/dL increase	rs10830962-C	chr11	92338075	C/G	0.611	0.45	0.5734	0.54	Yes	-
	1542	21909109	Kim YJ	Nat Genet	Serum metabolites	Other	8e-22	0	[0.0035-0.0055] IU/L increase	rs11066280-A	chr12	111302166	A/T	0	0.17	0	0	Yes	-
	1543	21909109	Kim YJ	Nat Genet	Serum metabolites	Other	3e-63	0	[0.0014-0.0018] IU/L increase	rs11066280-A	chr12	111302166	A/T	0	0.17	0	0	Yes	-
	1544	21909109	Kim YJ	Nat Genet	Serum metabolites	Other	2e-18	0	[0.0031-0.0047] IU/L decrease	rs12483959-A	chr22	42657329	A/G	0.167	0.42	0.1942	0.33	Yes	-
	1545	21909109	Kim YJ	Nat Genet	Serum metabolites	Other	2e-39	0	[0.00080-0.00120] IU/L increase	rs12483959-A	chr22	42657329	A/G	0.167	0.42	0.1942	0.33	Yes	-
	1546	21909109	Kim YJ	Nat Genet	Serum metabolites	Other	1e-20	2.71	[2.14-3.28] mg/dL decrease	rs12654264-T	chr5	74684359	A/T	0.398	0.48	0.4103	0.642	Yes	-
	1547	21909109	Kim YJ	Nat Genet	Serum metabolites	Other	3e-18	0.02	[0.014-0.022] mg/dL increase	rs13069049-T	chr3	66892632	A/T	0.177	0.17	0.08333	0.062	Yes	-
	1548	21909109	Kim YJ	Nat Genet	Serum metabolites	Other	2e-15	0.06	[0.042-0.069] mg/dL increase	rs16856247-T	chr2	169492659	C/T	0.009	0.35	0.006897	0.091	Yes	-
	1549	20037589	Illig T	Nat Genet	Serum metabolites	Other	7e-179	36.3	[NR] % variance explained	rs174547-C	chr11	61327359	C/T	0.344	0.3	0.2793	0.098	Yes	-
	1550	21909109	Kim YJ	Nat Genet	Serum metabolites	Other	2e-19	0.06	[0.049-0.075] mg/dL increase	rs1799884-A	chr7	44195593	C/T	0.195	0.19	0.2128	0.114	Yes	-
	1551	20037589	Illig T	Nat Genet	Serum metabolites	Other	5e-96	21.5	[NR] % variance explained	rs2014355-T	chr12	119659907	C/T	0.757	0.28	0.6979	0.782	Yes	-
	1552	20037589	Illig T	Nat Genet	Serum metabolites	Other	1e-63	14.6	[NR] % variance explained	rs211718-C	chr1	75879263	C/T	0.69	0.31	0.7324	0.784	Yes	-
	1553	21909109	Kim YJ	Nat Genet	Serum metabolites	Other	9e-13	0.03	[0.021-0.037] g/dL increase	rs2280401-A	chr19	54691821	A/G	0.121	0.17	0.1373	0.142	Yes	-
	1554	20037589	Illig T	Nat Genet	Serum metabolites	Other	3e-60	13.8	[NR] % variance explained	rs2286963-T	chr2	210768295	G/T	0.65	0.37	0.7257	0.676	Yes	-
	1555	21909109	Kim YJ	Nat Genet	Serum metabolites	Other	2e-12	2.95	[2.13-3.77] mg/dL increase	rs2738446-C	chr19	11088326	C/G	0.571	0.14	0.6424	0.614	Yes	-
	1556	21931564	Nicholson G	PLoS Genet	Serum metabolites	Other	1e-06	1.25	[0.80-1.70] unit increase	rs37369-T	chr5	35072872	C/T	0.088	NA	0.2289	0.261	Yes	-
	1557	21909109	Kim YJ	Nat Genet	Serum metabolites	Other	3e-21	0.02	[0.019-0.029] mg/dL decrease	rs4686914-T	chr3	189200234	C/T	0.358	0.38	0.2979	0.222	Yes	-
	1558	21909109	Kim YJ	Nat Genet	Serum metabolites	Other	2e-19	5.23	[4.09-6.37] mg/dL decrease	rs599839-G	chr1	109623689	A/G	0.279	0.06	0.1573	0.25	Yes	-
	1559	21909109	Kim YJ	Nat Genet	Serum metabolites	Other	6e-09	2.28	[1.51-3.05] mg/dL increase	rs651007-A	chr9	135143696	C/T	0.204	0.26	0.273	0.125	Yes	-
	1560	21909109	Kim YJ	Nat Genet	Serum metabolites	Other	1e-08	0.01	[0.0059-0.0121] mg/dL decrease	rs6569474-A	chr6	127535304	A/T	0.429	0.47	0.5105	0.494	Yes	-
	1561	21909109	Kim YJ	Nat Genet	Serum metabolites	Other	8e-14	0.01	[0.011-0.019] mg/dL decrease	rs7232775-C	chr18	41456402	C/T	0.292	0.2	0.1979	0.148	Yes	-
	1562	21909109	Kim YJ	Nat Genet	Serum metabolites	Other	5e-18	0.02	[-0.02972-0.07612] g/dL decrea	rs780092-G	chr2	27596658	A/G	0.128	0.33	0.1103	0.193	Yes	-
	1563	20037589	Illig T	Nat Genet	Serum metabolites	Other	4e-24	5.6	[NR] % variance explained	rs8396-T	chr4	159850267	C/T	0.695	0.3	0.8571	0.648	Yes	-
	1564	21909109	Kim YJ	Nat Genet	Serum metabolites	Other	1e-12	0.04	[0.029-0.050] mg/dL increase	rs895636-A	chr2	45041857	C/T	0.199	0.38	0.125	0.286	Yes	-
	1565	20558539	Kestenbaum B	J Am Soc Nephrol	Serum phosphorus levels	Other	1e-27	0.05	[NR] mg/dl increase	rs1697421-A	chr1	21695879	C/T	0.46	0.49	0.5603	0.375	Yes	-
	1566	20558539	Kestenbaum B	J Am Soc Nephrol	Serum phosphorus levels	Other	4e-09	0.04	[NR] mg/dl decrease	rs17265703-G	chr3	123531334	A/G	0.128	0.15	0.2241	0.256	Yes	-
	1567	20529992	Teupser D	Circ Cardiovasc Genet	Serum phytosterol levels	Other	6e-25	14	[NR] % decrease	rs41360247-C	chr2	43927160	C/T	0.08	0.064	0.05109	0.023	Yes	-
	1568	20529992	Teupser D	Circ Cardiovasc Genet	Serum phytosterol levels	Other	2e-50	12	[NR] % increase	rs4245791-C	chr2	43927935	C/T	0.288	0.322	0.2878	0	Yes	-
	1569	20529992	Teupser D	Circ Cardiovasc Genet	Serum phytosterol levels	Other	9e-13	8	[NR] % increase	rs657152-T	chr9	135129086	A/C	0.376	0.383	0.4896	0.432	Yes	-
	1570	21160077	Gudmundsson J	Sci Transl Med	Serum prostate-specific antigen levels	Other	2e-11	8.3	[NR] % increase	rs11067228-A	chr12	113578643	A/G	0.549	0.56	0.6276	0.528	Yes	-
	1571	21160077	Gudmundsson J	Sci Transl Med	Serum prostate-specific antigen levels	Other	3e-46	39.1	[NR] % increase	rs17632542-T	chr19	56053569	C/T	0.916	0.91	0.92069	0.955	Yes	-
	1572	21160077	Gudmundsson J	Sci Transl Med	Serum prostate-specific antigen levels	Other	1e-10	7	[NR] % increase	rs401681-C	chr5	1375087	C/T	0.566	0.55	0.7007	0.79	Yes	-
	1573	20884846	Yang Q	Circ Cardiovasc Genet	Serum urate	Other	2e-11	5.16	[3.65-6.67] umol/l decrease	rs1106766-T	chr12	56095723	C/T	0.246	0.23	0.1181	0.102	Yes	-
	1574	20884846	Yang Q	Circ Cardiovasc Genet	Serum urate	Other	5e-25	6.21	[5.03-7.39] umol/l decrease	rs1165196-G	chr6	25921129	A/G	0.451	0.46	0.3409	0.494	Yes	-
	1575	20884846	Yang Q	Circ Cardiovasc Genet	Serum urate	Other	1e-06	1.26	[1.14-1.38]	rs2078267-C	chr11	64090690	C/T	0.465	0.46	0.4296	0.58	Yes	-
	1576	20884846	Yang Q	Circ Cardiovasc Genet	Serum urate	Other	2e-26	6.8	[5.55-8.05] umol/l increase	rs2078267-C	chr11	64090690	C/T	0.465	0.46	0.4296	0.58	Yes	-
	1577	18327256	Doring A	Nat Genet	Serum urate	Other	3e-70	0.35	[NR] mg/dl decrease in uric acid	rs7442295-C	chr4	9575478	A/G	0.212	0.4	0.25	0.193	Yes	-
	1578	18179892	Wallace C	Am J Hum Genet	Serum urate	Other	2e-15	0.02	[0.02-0.03] mMol/L higher	rs7442295-A	chr4	9575478	A/G	0.788	0.79	0.75	0.807	Yes	-
	1579	22229870	Karns R	Ann Hum Genet	Serum uric acid	Other	2e-06	17.65	[NR] umol/L decrease	rs12999373-A	chr2	653483	A/G	0.217	0.27	0.2448	0.199	Yes	-
	1580	21294900	Charles BA	BMC Med Genomics	Serum uric acid	Other	4e-06	0.17	[0.10-0.24] unit decrease	rs1982821-T	chr3	179275801	G/T	0.195	0.17	0.2083	0.455	Yes	-
	1581	21294900	Charles BA	BMC Med Genomics	Serum uric acid	Other	5e-06	0.13	[0.08-0.18] unit decrease	rs2244967-T	chr10	49894772	C/T	0.832	0.46	0.5664	0.449	Yes	-
	1582	21294900	Charles BA	BMC Med Genomics	Serum uric acid	Other	5e-06	0.13	[0.08-0.18] unit decrease	rs717615-G	chr4	9713768	A/G	0.487	0.35	0.4207	0.432	Yes	-
	1583	22229870	Karns R	Ann Hum Genet	Serum uric acid	Other	3e-06	20.9	[NR] umol/L increase	rs765787-G	chr15	43287339	A/G	0.164	0.15	0.1783	0.159	Yes	-
	1584	19503597	Kolz M	PLoS Genet	Serum uric acid	Other	1e-09	0.05	[0.035-0.068] mg/dl increase	rs780094-T	chr2	27594741	C/T	0.394	0.42	0.4893	0.188	Yes	-
	1585	17999355	Stokowski RP	Am J Hum Genet	Skin pigmentation	Other	4e-10	4.36	[2.64-7.20]	rs1042602-C	chr11	88551344	A/C	0.571	0.84	0.6606	0.881	Yes	-
	1586	17952075	Sulem P	Nat Genet	Skin sensitivity to sun	Other	2e-06	1.26	[1.11-1.43]	rs1393350-A	chr11	88650694	A/G	0.226	0.27	0.1581	0.114	Yes	-
	1587	21118971	Wu C	Cancer Res	Small-cell lung cancer	Other	9e-08	1.83	[1.47-2.29] (AG)	rs716274-G	chr11	102923368	A/G	0.566	NA	0.5931	0.477	Yes	-
	1588	20418890	TGC	Nat Genet	Smoking behavior	Other	6e-10	0.37	[0.25-0.49] CPD decrease	rs1329650-T	chr10	93338100	G/T	0.296	0.28	0.3172	0.58	Yes	-
	1589	20418890	TGC	Nat Genet	Smoking behavior	Other	1e-08	0.33	[0.22-0.44] CPD increase	rs3733829-G	chr19	46002411	A/G	0.376	0.36	0.4478	0.438	Yes	-
	1590	20418890	TGC	Nat Genet	Smoking behavior	Other	2e-08	1.06	[1.04-1.08]	rs6265-C	chr11	27636492	C/T	0.805	0.79	0.8759	0.841	Yes	-
	1591	20167575	Sun Q	Hum Mol Genet	Soluble leptin receptor levels	Other	6e-13	7.6	[5.64-9.56] % decrease	rs1751492-C	chr1	65765213	C/T	0.323	0.3	0.1189	0.159	Yes	-
	1592	21801394	Genin E	Orphanet J Rare Dis	Stevens-Johnson syndrome and toxic epidermal necrolysis (SJS-TEN)	Other	2e-08	1.74	[1.43-2.13]	rs3130501-G	chr6	31244432	A/G	0.739	0.74	0.7241	0.756	Yes	-
	1593	19369658	Ikram MA	N Engl J Med	Stroke	Other	1e-09	1.29	[1.19-1.41]	rs12425791-A	chr12	653745	A/G	0.177	0.19	0.3414	0.301	Yes	-
	1594	20877300	Perroud N	Pharmacogenomics J	Suicidal ideation	Other	8e-07	1.88	[NR]	rs11143230-C	chr9	74077523	A/C	0.341	0.35	0.3481	0.318	Yes	-
	1595	20877300	Perroud N	Pharmacogenomics J	Suicidal ideation	Other	7e-06	2.22	[NR]	rs11143230-C	chr9	74077523	A/C	0.341	0.35	0.3481	0.318	Yes	-
	1596	21423239	Willour VL	Mol Psychiatry	Suicide attempts in bipolar disorder	Other	5e-08	1.22	[NR]	rs300774-A	chr2	102496	A/C	0.133	0.18	0.2951	0.256	Yes	-
	1597	19838193	Han JW	Nat Genet	Systemic lupus erythematosus	Other	2e-09	1.23	[1.15-1.33]	rs10036748-A	chr5	150438339	C/T	0.23	0.76	0.4549	0.364	Yes	-
	1598	18204447	Kozyrev SV	Nat Genet	Systemic lupus erythematosus	Other	4e-10	1.38	[1.25-1.53]	rs10516487-G	chr4	102970099	A/G	0.748	0.77	0.731	0.778	Yes	-
	1599	19838193	Han JW	Nat Genet	Systemic lupus erythematosus	Other	2e-08	1.2	[1.12-1.28]	rs1167796-G	chr7	75011116	A/G	0.553	0.71	0.5543	0.688	Yes	-
	1600	21408207	Chung SA	PLoS Genet	Systemic lupus erythematosus	Other	6e-09	1.58	[1.36-1.83]	rs12531711-G	chr7	128404702	A/G	0.124	0.11	0.1483	0.159	Yes	-
	1601	19838193	Han JW	Nat Genet	Systemic lupus erythematosus	Other	1e-15	1.43	[1.32-1.56]	rs13385731-A	chr2	33555394	C/T	0.938	0.85	0.95	0.96	Yes	-
	1602	19838193	Han JW	Nat Genet	Systemic lupus erythematosus	Other	2e-11	1.26	[1.18-1.35]	rs1385374-A	chr12	127866647	C/T	0.111	0.2	0.07292	0.193	Yes	-
	1603	21408207	Chung SA	PLoS Genet	Systemic lupus erythematosus	Other	6e-28	2.23	[1.94-2.57]	rs2187668-A	chr6	32713862	C/T	0.08	0.12	0.1458	0.102	Yes	-
	1604	18204098	Hom G	N Engl J Med	Systemic lupus erythematosus	Other	3e-21	NR	NR	rs2187668-A	chr6	32713862	C/T	0.08	0.11	0.1458	0.102	Yes	-
	1605	21408207	Chung SA	PLoS Genet	Systemic lupus erythematosus	Other	3e-07	1.38	[1.23-1.56]	rs2736340-T	chr8	11381382	C/T	0.239	0.23	0.1862	0.318	Yes	-
	1606	18204446	Harley JB	Nat Genet	Systemic lupus erythematosus	Other	2e-52	2.36	[2.11-2.64]	rs3131379-A	chr6	31829012	A/G	0.08	0.1	0.01042	0	Yes	-
	1607	19838193	Han JW	Nat Genet	Systemic lupus erythematosus	Other	8e-19	1.43	[1.32-1.54]	rs4728142-A	chr7	128361203	A/G	0.398	0.13	0.5	0.403	Yes	-
	1608	19838193	Han JW	Nat Genet	Systemic lupus erythematosus	Other	3e-23	1.39	[1.30-1.47]	rs4917014-A	chr7	50276409	G/T	0.679	0.68	0.7793	0.744	Yes	-
	1609	19838193	Han JW	Nat Genet	Systemic lupus erythematosus	Other	5e-12	1.25	[1.17-1.33]	rs548234-G	chr6	106674727	C/T	0.363	0.26	0.231	0.244	Yes	-
	1610	18204098	Hom G	N Engl J Med	Systemic lupus erythematosus	Other	4e-06	NR	NR	rs979233-T	chr5	42411000	A/C	0.465	0.46	0.4517	0.244	Yes	-
	1611	21750679	Allanore Y	PLoS Genet	Systemic sclerosis	Other	5e-09	1.31	[1.15-1.43]	rs2233287-A	chr5	150420290	A/G	0.058	0.1	0.07692	0.04	Yes	-
	1612	20383147	Radstake TR	Nat Genet	Systemic sclerosis	Other	3e-09	1.3	[1.19-1.41]	rs3821236-A	chr2	191611003	A/G	0.217	0.2	0.1448	0.21	Yes	-
	1613	21750679	Allanore Y	PLoS Genet	Systemic sclerosis	Other	2e-37	1.61	[1.49-1.72]	rs6457617-T	chr6	32771829	C/T	0.522	0.5	0.3655	0.432	Yes	-
	1614	21909115	Ehret GB	Nature	Systolic blood pressure	Other	7e-26	1.1	[NR] mmHg increase	rs11191548-T	chr10	104836168	C/T	0.925	0.91	0.743	0.724	Yes	-
	1615	19430483	Newton-Cheh C	Nat Genet	Systolic blood pressure	Other	7e-24	1.16	[0.92-1.40] mm Hg increase	rs11191548-T	chr10	104836168	C/T	0.925	0.91	0.743	0.724	Yes	-
	1616	21909115	Ehret GB	Nature	Systolic blood pressure	Other	2e-16	0.5	[NR] mmHg increase	rs1173771-G	chr5	32850785	A/G	0.509	0.6	0.5786	0.625	Yes	-
	1617	21909115	Ehret GB	Nature	Systolic blood pressure	Other	2e-08	0.34	[NR] mmHg increase	rs1327235-G	chr20	10917030	A/G	0.522	0.46	0.4306	0.455	Yes	-
	1618	21909115	Ehret GB	Nature	Systolic blood pressure	Other	6e-23	0.61	[NR] mmHg increase	rs1378942-C	chr15	72864420	A/C	0.321	0.35	0.6076	0.869	Yes	-
	1619	19430483	Newton-Cheh C	Nat Genet	Systolic blood pressure	Other	2e-13	0.85	[0.63-1.07] mm Hg decrease	rs17367504-G	chr1	11785365	A/G	0.832	0.14	0.8273	0.824	Yes	-
	1620	19430479	Levy D	Nat Genet	Systolic blood pressure	Other	1e-07	0.51	[0.31-0.71] mm Hg decrease	rs448378-A	chr3	170583593	A/G	0.451	0.52	0.5643	0.449	Yes	-
	1621	21909115	Ehret GB	Nature	Systolic blood pressure	Other	3e-12	0.62	[NR] mmHg decrease	rs7129220-G	chr11	10307114	A/G	0.106	0.89	0.05986	0.04	Yes	-
	1622	19340012	Nan H	J Invest Dermatol	Tanning	Other	5e-14	0.22	[0.16-0.28] increase in tanning ability score	rs12210050-T	chr6	420489	C/T	0.159	NA	0.03333	0.006	Yes	-
	1623	19340012	Nan H	J Invest Dermatol	Tanning	Other	2e-13	0.19	[0.13-0.25] increase in tanning ability score	rs1393350-A	chr11	88650694	A/G	0.226	NA	0.1581	0.114	Yes	-
	1624	19340012	Nan H	J Invest Dermatol	Tanning	Other	7e-08	0.14	[0.08-0.20] increase in tanning ability score	rs154659-C	chr16	88194838	C/T	0.29	NA	0.1528	0.227	Yes	-
	1625	19340012	Nan H	J Invest Dermatol	Tanning	Other	9e-08	0.2	[0.12-0.28] increase in tanning ability score	rs17094273-A	chr14	96173560	A/G	0.08	NA	0.07092	0.222	Yes	-
	1626	19340012	Nan H	J Invest Dermatol	Tanning	Other	4e-06	0.11	[0.07-0.15] decrease in tanning ability score	rs32579-A	chr5	149191041	C/T	0.301	NA	0.3794	0.398	Yes	-
	1627	21573004	Prescott J	PLoS One	Telomere length	Other	2e-14	0.03	[0.02-0.04] unit decrease	rs12696304-G	chr3	170963965	C/G	0.274	0.27	0.2482	0.352	Yes	-
	1628	20139977	Codd V	Nat Genet	Telomere length	Other	4e-14	0.11	[0.08-0.14] unit decrease	rs12696304-G	chr3	170963965	C/G	0.274	0.3	0.2482	0.352	Yes	-
	1629	20421499	Levy D	Proc Natl Acad Sci U S A	Telomere length	Other	2e-06	0.05	[0.03-0.07] kb increase	rs1975174-T	chr19	22307091	G/T	0.478	NA	0.5845	0.718	Yes	-
	1630	19483682	Kanetsky PA	Nat Genet	Testicular cancer	Other	6e-15	3.07	[2.29-4.13]	rs4474514-A	chr12	87478090	A/G	0.801	NA	0.8034	0.767	Yes	-
	1631	21551455	Kanetsky PA	Hum Mol Genet	Testicular cancer	Other	1e-11	1.7	[1.46-1.99]	rs7040024-A	chr9	835516	A/C	0.783	NA	0.6966	0.77	Yes	-
	1632	20543847	Turnbull C	Nat Genet	Testicular germ cell cancer	Other	8e-15	1.33	[1.18-1.50]	rs2736100-T	chr5	1339516	A/C	0.473	0.49	0.4397	0.355	Yes	-
	1633	19483681	Rapley EA	Nat Genet	Testicular germ cell tumor	Other	1e-13	1.5	[1.28-1.75]	rs210138-G	chr6	33650516	A/G	0.181	0.2	0.2743	0.438	Yes	-
	1634	19483681	Rapley EA	Nat Genet	Testicular germ cell tumor	Other	1e-31	2.55	[2.05-3.19]	rs995030-G	chr12	87414802	A/G	0.814	0.8	0.8394	0.791	Yes	-
	1635	19483681	Rapley EA	Nat Genet	Testicular germ cell tumor	Other	3e-30	2.69	[2.10-3.44]	rs1508595-G	chr12	87414802	A/G	0.814	0.83	0.8394	0.791	Yes	-
	1636	22267200	Gudmundsson J	Nat Genet	Thyroid cancer	Other	2e-09	1.36	[1.23-1.50]	rs2439302-G	chr8	32551911	C/G	0.465	0.351	0.5455	0.477	Yes	-
	1637	22267200	Gudmundsson J	Nat Genet	Thyroid cancer	Other	1e-09	1.34	[1.22-1.47]	rs966423-C	chr2	218018585	C/T	0.456	0.442	0.4241	0.739	Yes	-
	1638	21565293	Teumer A	Am J Hum Genet	Thyroid volume	Other	1e-14	1.52	[1.37-1.69]	rs10917468-C	chr1	19715941	C/T	0.27	0.217	0.2572	0.267	Yes	-
	1639	21565293	Teumer A	Am J Hum Genet	Thyroid volume	Other	3e-14	0.07	[0.05-0.09] unit increase	rs12045440-T	chr1	19638105	G/T	0.699	0.664	0.6172	0.648	Yes	-
	1640	21565293	Teumer A	Am J Hum Genet	Thyroid volume	Other	2e-11	1.38	[1.26-1.51]	rs12045440-T	chr1	19638105	G/T	0.699	0.664	0.6172	0.648	Yes	-
	1641	21565293	Teumer A	Am J Hum Genet	Thyroid volume	Other	9e-15	0.07	[0.05-0.09] unit increase	rs17767419-T	chr16	78302049	C/T	0.367	0.321	0.2897	0.108	Yes	-
	1642	20686565	Teslovich TM	Nature	Triglycerides	Hypertriglyceridemia	2e-29	7.83	[6.22-9.44] mg/dL decrease	rs10401969-C	chr19	19268718	C/T	0.097	0.07	0.1517	0.114	Yes	-
	1643	21909109	Kim YJ	Nat Genet	Triglycerides	Hypertriglyceridemia	7e-39	0.09	[0.073-0.098] mg/dL decrease	rs10503669-T	chr8	19891970	A/C	0.115	0.12	0.131	0.085	Yes	-
	1644	18193043	Willer CJ	Nat Genet	Triglycerides	Hypertriglyceridemia	4e-22	11.57	[NR] mg/dl higher	rs10503669-C	chr8	19891970	A/C	0.115	0.1	0.131	0.085	No	Duplicated
	1645	19060906	Kathiresan S	Nat Genet	Triglycerides	Hypertriglyceridemia	3e-07	0.05	[0.01-0.09] s.d. decrease	rs10889353-C	chr1	62890784	A/C	0.336	0.33	0.2641	0.392	No	LD to rs1748195
	1646	19074352	Pollin TI	Science	Triglycerides	Hypertriglyceridemia	3e-29	NR	NR	rs10892151-A	chr11	117036941	C/T	0.031	0.028	0.04138	0.062	No	LD to rs964184
	1647	20686565	Teslovich TM	Nature	Triglycerides	Hypertriglyceridemia	3e-08	2.13	[1.37-2.89] mg/dL decrease	rs11649653-G	chr16	30825988	C/G	0.39	0.4	0.441	0.227	Yes	-
	1648	20864672	Waterworth DM	Arterioscler Thromb Vasc Biol	Triglycerides	Hypertriglyceridemia	6e-08	0.04	[0.03-0.05] unit increase	rs1168013-G	chr1	62769426	C/G	0.659	0.65	0.7379	0.551	No	LD to rs1748195
	1649	18193044	Kathiresan S	Nat Genet	Triglycerides	Hypertriglyceridemia	2e-08	0.11	[0.07-0.15] % SD lower	rs12130333-T	chr1	62964365	C/T	0.223	0.22	0.1042	0.136	No	LD to rs1748195
	1650	18193043	Willer CJ	Nat Genet	Triglycerides	Hypertriglyceridemia	1e-26	25.82	[NR] mg/dl higher	rs12286037-T	chr11	116157417	C/T	0.04	0.06	0.08681	0.028	No	LD to rs964184
	1651	18193044	Kathiresan S	Nat Genet	Triglycerides	Hypertriglyceridemia	4e-09	0.1	[0.06-0.14] % SD lower	rs16996148-T	chr19	19519472	G/T	0.095	0.1	0.1314	0.097	No	Duplicated
	1652	18193043	Willer CJ	Nat Genet	Triglycerides	Hypertriglyceridemia	3e-09	6.1	[NR] mg/dl higher	rs16996148-G	chr19	19519472	G/T	0.095	NA	0.1314	0.097	Yes	-
	1653	20686565	Teslovich TM	Nature	Triglycerides	Hypertriglyceridemia	9e-59	7.91	[6.93-8.89] mg/dL decrease	rs17145738-G	chr7	72620810	C/T	0.878	0.81	0.95804	0.938	Yes	-
	1654	18193044	Kathiresan S	Nat Genet	Triglycerides	Hypertriglyceridemia	7e-22	0.14	[0.25-0.53] % SD lower	rs17145738-T	chr7	72620810	C/T	0.878	0.87	0.95804	0.938	No	Duplicated
	1655	18193043	Willer CJ	Nat Genet	Triglycerides	Hypertriglyceridemia	2e-12	8.21	[NR] mg/dl higher	rs17145738-C	chr7	72620810	C/T	0.878	0.84	0.95804	0.938	No	Duplicated
	1656	18193044	Kathiresan S	Nat Genet	Triglycerides	Hypertriglyceridemia	4e-17	0.08	[0.06-0.10] % SD lower	rs17321515-G	chr8	126555591	A/G	0.429	0.49	0.4549	0.375	No	LD to rs2001945
	1657	18193043	Willer CJ	Nat Genet	Triglycerides	Hypertriglyceridemia	7e-13	6.42	[NR] mg/dl higher	rs17321515-A	chr8	126555591	A/G	0.429	0.44	0.4549	0.375	No	Duplicated
	1658	19060906	Kathiresan S	Nat Genet	Triglycerides	Hypertriglyceridemia	2e-14	0.06	[0.02-0.10] s.d. increase	rs174547-C	chr11	61327359	C/T	0.344	0.33	0.2793	0.098	No	LD to rs174548
	1659	20864672	Waterworth DM	Arterioscler Thromb Vasc Biol	Triglycerides	Hypertriglyceridemia	5e-14	0.03	[0.02-0.04] unit increase	rs174548-G	chr11	61327924	C/G	0.301	NonEuro	0.2414	0.097	Yes	-
	1660	18193043	Willer CJ	Nat Genet	Triglycerides	Hypertriglyceridemia	2e-10	7.12	[NR] mg/dl higher	rs1748195-C	chr1	62822181	C/G	0.659	0.7	0.7218	0.552	Yes	-
	1661	21909109	Kim YJ	Nat Genet	Triglycerides	Hypertriglyceridemia	1e-20	0.04	[0.032-0.049] mg/dL increase	rs2001945-C	chr8	126547160	C/G	0.487	NonEuro	0.5972	0.455	Yes	-
	1662	18193043	Willer CJ	Nat Genet	Triglycerides	Hypertriglyceridemia	8e-07	4.25	[NR] mg/dl higher	rs2144300-C	chr1	228361539	C/T	0.432	0.4	0.5	0.631	No	LD to rs4846914
	1663	21909109	Kim YJ	Nat Genet	Triglycerides	Hypertriglyceridemia	1e-15	0.07	[0.049-0.081] mg/dL decrease	rs2286276-T	chr7	72625290	C/T	0.259	NonEuro	0.1111	0.182	No	LD to rs7145738
	1664	18193046	Kooner JS	Nat Genet	Triglycerides	Hypertriglyceridemia	5e-12	6.6	[3.66-9.54] % higher	rs326-A	chr8	19863719	A/G	0.708	NonEuro	0.6276	0.83	No	LD to rs10503669
	1665	17463246	Saxena R	Science	Triglycerides	Other	3e-13	2.4	% [NR] of variance explained	rs4420638-G	chr19	50114786	A/G	0.183	0.22	0.2345	0.057	Yes	-
	1666	20686565	Teslovich TM	Nature	Triglycerides	Hypertriglyceridemia	1e-08	2.42	[1.62-3.22] mg/dL decrease	rs4765127-G	chr12	123026120	G/T	0.615	0.66	0.6215	0.805	Yes	-
	1667	18193043	Willer CJ	Nat Genet	Triglycerides	Hypertriglyceridemia	2e-08	3.62	[NR] mg/dl higher	rs4775041-C	chr15	56461987	C/G	0.318	0.33	0.2971	0.233	Yes	-
	1668	20686565	Teslovich TM	Nature	Triglycerides	Hypertriglyceridemia	2e-14	2.76	[2.02-3.5] mg/dL increase	rs4846914-G	chr1	228362314	A/G	0.429	0.39	0.4931	0.636	No	Duplicated
	1669	18193044	Kathiresan S	Nat Genet	Triglycerides	Hypertriglyceridemia	7e-15	0.08	[0.06-0.10] % SD higher	rs4846914-G	chr1	228362314	A/G	0.429	0.4	0.4931	0.636	Yes	-
	1670	21909109	Kim YJ	Nat Genet	Triglycerides	Hypertriglyceridemia	2e-86	0.09	[0.079-0.096] mg/dL decrease	rs603446-T	chr11	116159645	C/T	0.473	NonEuro	0.369	0.267	No	LD to rs964184
	1671	20686565	Teslovich TM	Nature	Triglycerides	Hypertriglyceridemia	3e-08	2.22	[1.34-3.1] mg/dL decrease	rs645040-G	chr3	137409312	G/T	0.23	0.22	0.1597	0.284	Yes	-
	1672	20864672	Waterworth DM	Arterioscler Thromb Vasc Biol	Triglycerides	Hypertriglyceridemia	2e-07	0.04	[0.03-0.05] unit decrease	rs6544366-T	chr2	21057522	G/T	0.212	0.22	0.3034	0.551	No	LD to rs673548
	1673	18193044	Kathiresan S	Nat Genet	Triglycerides	Hypertriglyceridemia	2e-07	0.08	[0.04-0.12] % SD higher	rs693-A	chr2	21085700	A/G	0.491	0.48	0.4362	0.233	No	LD to rs673548
	1674	17463246	Saxena R	Science	Triglycerides	Other	7e-07	NR	NR	rs693-A	chr2	21085700	A/G	0.491	0.49	0.4362	0.233	Yes	-
	1675	21909109	Kim YJ	Nat Genet	Triglycerides	Hypertriglyceridemia	5e-27	0.05	[0.041-0.059] mg/dL decrease	rs780092-G	chr2	27596658	A/G	0.128	NonEuro	0.1103	0.193	No	LD to rs780094
	1676	19060911	Aulchenko YS	Nat Genet	Triglycerides	Hypertriglyceridemia	3e-20	0.1	[NR] s.d. decrease	rs780094-G	chr2	27594741	C/T	0.394	0.37	0.4893	0.188	No	Duplicated
	1677	18193044	Kathiresan S	Nat Genet	Triglycerides	Hypertriglyceridemia	3e-14	0.13	[0.09-0.17] % SD higher	rs780094-T	chr2	27594741	C/T	0.394	0.34	0.4893	0.188	No	Duplicated
	1678	18193043	Willer CJ	Nat Genet	Triglycerides	Hypertriglyceridemia	6e-32	8.59	[NR] mg/dl higher	rs780094-T	chr2	27594741	C/T	0.394	0.39	0.4893	0.188	Yes	-
	1679	20686565	Teslovich TM	Nature	Triglycerides	Hypertriglyceridemia	7e-240	16.95	[16.01-17.89] mg/dL increase	rs964184-G	chr11	116154127	C/G	0.121	0.13	0.1771	0.176	Yes	-
	1680	19060906	Kathiresan S	Nat Genet	Triglycerides	Hypertriglyceridemia	4e-62	0.3	[0.24-0.36] s.d. increase	rs964184-G	chr11	116154127	C/G	0.121	0.14	0.1771	0.176	No	Duplicated
	1681	20932310	Han MR	BMC Neurol	T-tau	Other	1e-08	NR	NR	rs1997111-T	chr12	117872301	A/C	0.292	NA	0.3298	0.489	Yes	-
	1682	20694014	Thye T	Nat Genet	Tuberculosis	Other	2e-06	1.19	[1.10-1.30]	rs2335704-C	chr2	205573077	A/C	0.097	0.2	0.0625	0.068	Yes	-
	1683	20694014	Thye T	Nat Genet	Tuberculosis	Other	7e-09	1.19	[1.10-1.30]	rs4331426-G	chr18	18444793	A/G	0.035	0.48	0.08681	0.045	Yes	-
	1684	20081857	Saxena R	Nat Genet	Two-hour glucose challenge	Insulin	1e-07	0.08	[0.06-0.10] mmol/L increase	rs12243326-C	chr10	114778805	C/T	0.243	NA	0.2118	0.239	Yes	-
	1685	17554300	WTCCC	Nature	Type 1 diabetes	Other	7e-07	1.49	[1.28-1.73]	rs11052552-G	chr12	9747225	G/T	0.549	0.49	0.5451	0.489	Yes	-
	1686	17554300	WTCCC	Nature	Type 1 diabetes	Other	1e-11	1.34	[1.17-1.54]	rs11171739-C	chr12	54756892	C/T	0.407	0.42	0.369	0.25	Yes	-
	1687	18978792	Cooper JD	Nat Genet	Type 1 diabetes	Other	5e-12	1.13	[1.08-1.19]	rs11755527-G	chr6	91014952	C/G	0.429	0.47	0.3462	0.374	Yes	-
	1688	18978792	Cooper JD	Nat Genet	Type 1 diabetes	Other	2e-06	NR	NR	rs12251307-T	chr10	6163501	C/T	0.102	NA	0.2069	0.18	Yes	-
	1689	19430480	Barrett JC	Nat Genet	Type 1 diabetes	Other	2e-07	1.1	[1.03-1.17]	rs12444268-A	chr16	20250073	A/T	0.323	0.3	0.1862	0.176	Yes	-
	1690	18978792	Cooper JD	Nat Genet	Type 1 diabetes	Other	7e-13	NR	NR	rs12708716-G	chr16	11087374	A/G	0.319	NA	0.2609	0.477	Yes	-
	1691	17554300	WTCCC	Nature	Type 1 diabetes	Other	5e-07	1.19	[0.97-1.45]	rs12708716-A	chr16	11087374	A/G	0.681	0.65	0.7391	0.523	Yes	-
	1692	17554260	Todd JA	Nat Genet	Type 1 diabetes	Other	3e-18	1.23	[1.16-1.30]	rs12708716-A	chr16	11087374	A/G	0.681	0.68	0.7391	0.523	Yes	-
	1693	17554300	WTCCC	Nature	Type 1 diabetes	Other	5e-06	1.3	[1.15-1.47]	rs17166496-G	chr5	132656783	C/G	0.416	0.61	0.5735	0.54	Yes	-
	1694	17554300	WTCCC	Nature	Type 1 diabetes	Other	3e-06	1.26	[1.11-1.42]	rs17388568-A	chr4	123548812	A/G	0.345	0.26	0.3207	0.151	Yes	-
	1695	18978792	Cooper JD	Nat Genet	Type 1 diabetes	Other	6e-18	NR	NR	rs17696736-G	chr12	110971201	A/G	0.358	NA	0.3586	0.131	Yes	-
	1696	17554300	WTCCC	Nature	Type 1 diabetes	Other	2e-14	1.34	[1.16-1.53]	rs17696736-G	chr12	110971201	A/G	0.358	0.42	0.3586	0.131	Yes	-
	1697	17554260	Todd JA	Nat Genet	Type 1 diabetes	Other	2e-16	1.22	[1.15-1.28]	rs17696736-G	chr12	110971201	A/G	0.358	0.42	0.3586	0.131	Yes	-
	1698	18978792	Cooper JD	Nat Genet	Type 1 diabetes	Other	4e-06	1.07	[1.01-1.13]	rs2165738-C	chr2	24546313	C/G	0.283	0.27	0.169	0.267	Yes	-
	1699	19430480	Barrett JC	Nat Genet	Type 1 diabetes	Other	4e-07	1.1	[1.02-1.18]	rs2269241-G	chr1	63881359	C/T	0.159	0.19	0.09655	0.148	Yes	-
	1700	18978792	Cooper JD	Nat Genet	Type 1 diabetes	Other	3e-16	NR	NR	rs2292239-A	chr12	54768447	G/T	0.33	NA	0.3194	0.193	Yes	-
	1701	17554260	Todd JA	Nat Genet	Type 1 diabetes	Other	2e-20	1.28	[1.21-1.35]	rs2292239-A	chr12	54768447	G/T	0.33	0.34	0.3194	0.193	Yes	-
	1702	18978792	Cooper JD	Nat Genet	Type 1 diabetes	Other	2e-08	1.11	[1.05-1.16]	rs229541-T	chr22	35921264	A/G	0.42	0.43	0.472	0	Yes	-
	1703	19966805	Wallace C	Nat Genet	Type 1 diabetes	Other	4e-09	1.16	[1.11-1.22]	rs2304256-C	chr19	10336652	A/C	0.679	0.71	0.7254	0.759	Yes	-
	1704	18978792	Cooper JD	Nat Genet	Type 1 diabetes	Other	9e-08	NR	NR	rs2542151-C	chr18	12769947	G/T	0.115	NA	0.1424	0.102	Yes	-
	1705	17554260	Todd JA	Nat Genet	Type 1 diabetes	Other	1e-14	1.3	[1.22-1.40]	rs2542151-C	chr18	12769947	G/T	0.115	0.16	0.1424	0.102	Yes	-
	1706	18978792	Cooper JD	Nat Genet	Type 1 diabetes	Other	8e-11	NR	NR	rs3087243-A	chr2	204447164	A/G	0.46	NA	0.588	0.653	Yes	-
	1707	18978792	Cooper JD	Nat Genet	Type 1 diabetes	Other	3e-15	1.16	[1.10-1.22]	rs3825932-T	chr15	77022501	C/T	0.305	0.68	0.3662	0.391	Yes	-
	1708	18978792	Cooper JD	Nat Genet	Type 1 diabetes	Other	3e-06	1.06	[1.01-1.12]	rs416603-T	chr16	11271580	A/T	0.451	0.44	0.4889	0.432	Yes	-
	1709	19430480	Barrett JC	Nat Genet	Type 1 diabetes	Other	2e-11	1.09	[1.02-1.16]	rs4763879-A	chr12	9801431	A/G	0.385	0.37	0.3601	0.402	Yes	-
	1710	19430480	Barrett JC	Nat Genet	Type 1 diabetes	Other	4e-09	1.09	[1.02-1.16]	rs4900384-G	chr14	97568704	A/G	0.265	0.29	0.3793	0.621	Yes	-
	1711	18978792	Cooper JD	Nat Genet	Type 1 diabetes	Other	1e-40	NR	NR	rs6679677-A	chr1	114105331	A/C	0.115	NA	0.05903	0.006	Yes	-
	1712	17554300	WTCCC	Nature	Type 1 diabetes	Other	5e-26	1.82	[1.59-2.09]	rs6679677-A	chr1	114105331	A/C	0.115	0.1	0.05903	0.006	Yes	-
	1713	17554260	Todd JA	Nat Genet	Type 1 diabetes	Other	8e-24	1.89	[1.67-2.13]	rs6679677-A	chr1	114105331	A/C	0.115	0.1	0.05903	0.006	Yes	-
	1714	17554260	Todd JA	Nat Genet	Type 1 diabetes	Other	8e-06	1.12	[1.06-1.19]	rs6897932-G	chr5	35910332	C/T	0.757	0.71	0.7882	0.869	Yes	-
	1715	18978792	Cooper JD	Nat Genet	Type 1 diabetes	Other	6e-129	NR	NR	rs9272346-G	chr6	32712350	A/G	0.425	NA	0.5655	0.511	Yes	-
	1716	17554300	WTCCC	Nature	Type 1 diabetes	Other	5e-134	5.49	[4.83-6.24]	rs9272346-G	chr6	32712350	A/G	0.425	0.61	0.5655	0.511	Yes	-
	1717	19430480	Barrett JC	Nat Genet	Type 1 diabetes	Other	4e-13	1.17	[1.10-1.24]	rs9388489-G	chr6	126740412	A/G	0.412	0.45	0.4007	0.676	Yes	-
	1718	18978792	Cooper JD	Nat Genet	Type 1 diabetes	Other	4e-09	1.1	[1.03-1.18]	rs947474-G	chr10	6430456	A/G	0.155	0.19	0.1597	0.182	Yes	-
	1719	17554260	Todd JA	Nat Genet	Type 1 diabetes	Other	5e-06	1.11	[1.05-1.17]	rs9653442-G	chr2	100191799	C/T	0.42	0.46	0.4759	0.574	Yes	-
	1720	18840781	Grant SF	Diabetes	Type 1 diabetes	Other	2e-08	1.16	[1.10-1.22]	rs9976767-C	chr21	42709459	A/G	0.398	NA	0.4618	0.375	Yes	-
	1721	21829393	Plagnol V	PLoS Genet	Type 1 diabetes autoantibodies	Other	3e-08	1.1	[NR]	rs11755527-G	chr6	91014952	C/G	0.429	NA	0.3462	0.374	Yes	-
	1722	21829393	Plagnol V	PLoS Genet	Type 1 diabetes autoantibodies	Other	5e-14	1.2	[NR]	rs12708716-G	chr16	11087374	A/G	0.319	NA	0.2609	0.477	Yes	-
	1723	21829393	Plagnol V	PLoS Genet	Type 1 diabetes autoantibodies	Other	6e-06	1.1	[NR]	rs17388568-A	chr4	123548812	A/G	0.345	NA	0.3207	0.151	Yes	-
	1724	21829393	Plagnol V	PLoS Genet	Type 1 diabetes autoantibodies	Other	3e-27	1.3	[NR]	rs2292239-T	chr12	54768447	G/T	0.33	NA	0.3194	0.193	Yes	-
	1725	21829393	Plagnol V	PLoS Genet	Type 1 diabetes autoantibodies	Other	4e-13	1.3	[NR]	rs2542151-G	chr18	12769947	G/T	0.115	NA	0.1424	0.102	Yes	-
	1726	21829393	Plagnol V	PLoS Genet	Type 1 diabetes autoantibodies	Other	2e-06	1.1	[NR]	rs2872507-A	chr17	35294289	A/G	0.473	NA	0.4655	0.33	Yes	-
	1727	21829393	Plagnol V	PLoS Genet	Type 1 diabetes autoantibodies	Other	5e-10	1.2	[NR]	rs3024505-G	chr1	205006527	A/G	0.819	NA	0.7812	0.81	Yes	-
	1728	21829393	Plagnol V	PLoS Genet	Type 1 diabetes autoantibodies	Other	2e-17	1.2	[NR]	rs3087243-A	chr2	204447164	A/G	0.46	NA	0.588	0.653	Yes	-
	1729	21829393	Plagnol V	PLoS Genet	Type 1 diabetes autoantibodies	Other	2e-06	1.1	[NR]	rs743777-G	chr22	35881553	A/G	0.296	NA	0.3056	0.176	Yes	-
	1730	21490949	Sim X	PLoS Genet	Type 2 diabetes	Type 2 Diabetes	9e-06	1.35	[1.18-1.54]	rs10460009-C	chr18	2938029	C/T	0.915	NonEuro	0.7655	0.75	Yes	-
	1731	21490949	Sim X	PLoS Genet	Type 2 diabetes	Type 2 Diabetes	3e-08	1.54	[1.32-1.80]	rs1048886-G	chr6	71345910	A/G	0.146	NonEuro	0.2172	0.159	Yes	-
	1732	17463246	Saxena R	Science	Type 2 diabetes	Type 2 Diabetes	5e-08	1.2	[1.12-1.28]	rs10811661-T	chr9	22124094	C/T	0.801	0.83	0.869	0.909	No	Duplicated
	1733	17463248	Scott LJ	Science	Type 2 diabetes	Type 2 Diabetes	8e-15	1.2	[1.14-1.25]	rs10811661-T	chr9	22124094	C/T	0.801	0.85	0.869	0.909	No	LD to rs2383208
	1734	17463249	Zeggini E	Science	Type 2 diabetes	Type 2 Diabetes	5e-06	1.19	[1.11-1.28]	rs10811661-T	chr9	22124094	C/T	0.801	0.83	0.869	0.909	No	Duplicated
	1735	20862305	Shu XO	PLoS Genet	Type 2 diabetes	Type 2 Diabetes	1e-08	1.13	[1.08-1.18]	rs10906115-A	chr10	12355003	A/G	0.642	NonEuro	0.6667	0.562	Yes	-
	1736	18372903	Zeggini E	Nat Genet	Type 2 diabetes	Type 2 Diabetes	4e-08	1.13	[1.08-1.17]	rs10923931-T	chr1	120319482	G/T	0.093	0.11	0.07931	0.21	Yes	-
	1737	17463249	Zeggini E	Science	Type 2 diabetes	Type 2 Diabetes	1e-08	1.16	[1.10-1.22]	rs10946398-C	chr6	20769013	A/C	0.336	0.32	0.3172	0.216	No	LD to rs7754840
	1738	19401414	Takeuchi F	Diabetes	Type 2 diabetes	Type 2 Diabetes	7e-12	1.21	[1.15-1.28]	rs1111875-C	chr10	94452862	C/T	0.584	NonEuro	0.5315	0.415	Yes	-
	1739	17463246	Saxena R	Science	Type 2 diabetes	Type 2 Diabetes	6e-10	1.13	[1.08-1.17]	rs1111875-C	chr10	94452862	C/T	0.584	0.53	0.5315	0.415	No	Duplicated
	1740	17463248	Scott LJ	Science	Type 2 diabetes	Type 2 Diabetes	6e-10	1.13	[1.09-1.17]	rs1111875-C	chr10	94452862	C/T	0.584	0.52	0.5315	0.415	No	Duplicated
	1741	17293876	Sladek R	Nature	Type 2 diabetes	Type 2 Diabetes	3e-06	1.19	[0.82-1.56]	rs1111875-G	chr10	94452862	C/T	0.584	0.6	0.5315	0.415	No	Duplicated
	1742	18372903	Zeggini E	Nat Genet	Type 2 diabetes	Type 2 Diabetes	2e-07	1.08	[1.05-1.11]	rs1153188-A	chr12	53385263	A/T	0.743	0.73	0.8172	0.824	Yes	-
	1743	20581827	Voight BF	Nat Genet	Type 2 diabetes	Type 2 Diabetes	2e-09	1.06	[1.04-1.08]	rs11634397-G	chr15	78219277	A/G	0.642	NA	0.6458	0.551	Yes	-
	1744	21490949	Sim X	PLoS Genet	Type 2 diabetes	Type 2 Diabetes	4e-07	1.41	[1.23-1.61]	rs12027542-A	chr1	231406777	A/G	0.933	NonEuro	0.8921	0.955	Yes	-
	1745	17554300	WTCCC	Nature	Type 2 diabetes	Type 2 Diabetes	7e-06	2.5	[1.53-4.09]	rs12304921-G	chr12	49643809	A/G	0.155	0.15	0.2014	0.358	Yes	-
	1746	21573907	Parra EJ	Diabetologia	Type 2 diabetes	Type 2 Diabetes	6e-10	1.22	[1.15-1.30]	rs1333051-A	chr9	22126489	A/T	0.835	NA	0.91071	0.932	No	LD to rs2383208
	1747	20862305	Shu XO	PLoS Genet	Type 2 diabetes	Type 2 Diabetes	6e-09	1.15	[1.10-1.20]	rs1359790-G	chr13	79615157	A/G	0.727	NonEuro	0.8662	0.835	Yes	-
	1748	21799836	Cui B	PLoS One	Type 2 diabetes	Type 2 Diabetes	8e-06	1.14	[NR]	rs1436953-G	chr15	60201306	C/T	0.429	NonEuro	0.4037	0.551	No	LD to rs1436955
	1749	20862305	Shu XO	PLoS Genet	Type 2 diabetes	Type 2 Diabetes	7e-07	1.13	[1.08-1.19]	rs1436955-C	chr15	60191674	C/T	0.743	NonEuro	0.7345	0.739	Yes	-
	1750	20581827	Voight BF	Nat Genet	Type 2 diabetes	Type 2 Diabetes	2e-09	1.14	[1.09-1.19]	rs1470579-C	chr3	187011774	A/C	0.296	NA	0.4113	0.511	Yes	-
	1751	17554300	WTCCC	Nature	Type 2 diabetes	Type 2 Diabetes	7e-06	1.28	[1.11-1.49]	rs1495377-G	chr12	69863368	C/G	0.482	0.5	0.5	0.42	No	LD to rs7961581
	1752	20581827	Voight BF	Nat Genet	Type 2 diabetes	Type 2 Diabetes	4e-09	1.1	[1.07-1.14]	rs1531343-C	chr12	64461161	C/G	0.115	NA	0.1517	0.182	Yes	-
	1753	21490949	Sim X	PLoS Genet	Type 2 diabetes	Type 2 Diabetes	7e-06	1.38	[1.20-1.59]	rs17045328-G	chr1	205718799	A/G	0.027	NonEuro	0.02069	0.068	Yes	-
	1754	22158537	Cho YS	Nat Genet	Type 2 diabetes	Type 2 Diabetes	9e-07	1.08	[1.05–1.12]	rs17797882-T	chr16	77964419	C/T	0.009	NonEuro	0.03169	0.034	Yes	-
	1755	17463246	Saxena R	Science	Type 2 diabetes	Type 2 Diabetes	2e-06	1.14	[1.08-1.20]	rs1801282-C	chr3	12368125	C/G	0.903	0.86	0.95862	0.909	No	Duplicated
	1756	17463248	Scott LJ	Science	Type 2 diabetes	Type 2 Diabetes	2e-06	1.14	[1.08-1.20]	rs1801282-C	chr3	12368125	C/G	0.903	0.82	0.95862	0.909	No	Duplicated
	1757	17463249	Zeggini E	Science	Type 2 diabetes	Type 2 Diabetes	2e-06	1.14	[1.08-1.20]	rs1801282-C	chr3	12368125	C/G	0.903	NA	0.95862	0.909	Yes	-
	1758	21874001	Kooner JS	Nat Genet	Type 2 diabetes	Type 2 Diabetes	4e-08	1.08	[1.05-1.12]	rs1802295-A	chr10	70601480	C/T	0.353	NonEuro	0.2724	0.307	Yes	-
	1759	19401414	Takeuchi F	Diabetes	Type 2 diabetes	Type 2 Diabetes	2e-29	1.34	[1.27-1.41]	rs2383208-A	chr9	22122076	A/G	0.792	NonEuro	0.8706	0.914	Yes	-
	1760	22238593	Palmer ND	PLoS One	Type 2 diabetes	Type 2 Diabetes	2e-06	1.35	[1.19-1.54]	rs2722769-C	chr11	11184950	C/G	0.558	NonEuro	0.7138	0.739	Yes	-
	1761	21490949	Sim X	PLoS Genet	Type 2 diabetes	Type 2 Diabetes	9e-06	1.81	[1.39-2.35]	rs3773506-C	chr3	143913690	C/G	0.04	NonEuro	0.02069	0.04	Yes	-
	1762	19401414	Takeuchi F	Diabetes	Type 2 diabetes	Type 2 Diabetes	1e-06	1.14	[1.08-1.21]	rs4402960-T	chr3	186994381	G/T	0.296	NonEuro	0.4306	0.506	No	Duplicated
	1763	18372903	Zeggini E	Nat Genet	Type 2 diabetes	Type 2 Diabetes	8e-08	1.17	[1.10-1.25]	rs4402960-T	chr3	186994381	G/T	0.296	NA	0.4306	0.506	No	Duplicated
	1764	17463246	Saxena R	Science	Type 2 diabetes	Type 2 Diabetes	2e-09	1.17	[1.11-1.23]	rs4402960-T	chr3	186994381	G/T	0.296	0.29	0.4306	0.506	No	Duplicated
	1765	17463248	Scott LJ	Science	Type 2 diabetes	Type 2 Diabetes	9e-16	1.14	[1.11-1.18]	rs4402960-T	chr3	186994381	G/T	0.296	0.3	0.4306	0.506	No	Duplicated
	1766	17463249	Zeggini E	Science	Type 2 diabetes	Type 2 Diabetes	9e-16	1.14	[1.11-1.18]	rs4402960-T	chr3	186994381	G/T	0.296	0.32	0.4306	0.506	Yes	-
	1767	17554300	WTCCC	Nature	Type 2 diabetes	Type 2 Diabetes	5e-12	1.36	[1.20-1.54]	rs4506565-T	chr10	114746031	A/T	0.296	0.32	0.2276	0.305	No	LD to rs7901695
	1768	18372903	Zeggini E	Nat Genet	Type 2 diabetes	Type 2 Diabetes	1e-08	1.09	[1.06-1.12]	rs4607103-C	chr3	64686944	C/T	0.81	0.76	0.6028	0.494	Yes	-
	1769	20862305	Shu XO	PLoS Genet	Type 2 diabetes	Type 2 Diabetes	9e-06	1.17	[1.11-1.24]	rs5015480-C	chr10	94455539	C/T	0.58	NonEuro	0.535	0.443	No	Duplicated
	1770	20581827	Voight BF	Nat Genet	Type 2 diabetes	Type 2 Diabetes	1e-15	1.18	[1.13-1.23]	rs5015480-C	chr10	94455539	C/T	0.58	NA	0.535	0.443	No	LD to rs1111875
	1771	18372903	Zeggini E	Nat Genet	Type 2 diabetes	Type 2 Diabetes	7e-08	1.17	[1.11-1.24]	rs5015480-C	chr10	94455539	C/T	0.58	NA	0.535	0.443	No	Duplicated
	1772	17463249	Zeggini E	Science	Type 2 diabetes	Type 2 Diabetes	5e-06	1.13	[1.07-1.19]	rs5015480-C	chr10	94455539	C/T	0.58	0.57	0.535	0.443	No	Duplicated
	1773	18372903	Zeggini E	Nat Genet	Type 2 diabetes	Type 2 Diabetes	4e-07	1.16	[1.09-1.23]	rs5215-C	chr11	17365206	C/T	0.398	NA	0.3345	0.397	No	Duplicated
	1774	17463249	Zeggini E	Science	Type 2 diabetes	Type 2 Diabetes	5e-11	1.14	[1.10-1.19]	rs5215-C	chr11	17365206	C/T	0.398	NA	0.3345	0.397	Yes	-
	1775	17463249	Zeggini E	Science	Type 2 diabetes	Type 2 Diabetes	1e-06	1.13	[1.08-1.19]	rs564398-T	chr9	22019547	C/T	0.566	0.56	0.6875	0.676	Yes	-
	1776	22238593	Palmer ND	PLoS One	Type 2 diabetes	Type 2 Diabetes	3e-07	1.18	[1.10-1.27]	rs7107217-C	chr11	128978900	A/C	0.496	NonEuro	0.7092	0.636	Yes	-
	1777	21573907	Parra EJ	Diabetologia	Type 2 diabetes	Type 2 Diabetes	2e-08	1.14	[1.09-1.20]	rs7305618-C	chr12	119887315	C/T	0.796	NA	0.7118	0.739	Yes	-
	1778	22238593	Palmer ND	PLoS One	Type 2 diabetes	Type 2 Diabetes	6e-06	1.16	[1.09-1.25]	rs7542900-C	chr1	94842629	C/T	0.802	NonEuro	0.8194	0.776	Yes	-
	1779	22238593	Palmer ND	PLoS One	Type 2 diabetes	Type 2 Diabetes	7e-09	1.33	[1.19-1.49]	rs7560163-C	chr2	151346182	C/G	0.995	NonEuro	0.95185	0.959	Yes	-
	1780	17463246	Saxena R	Science	Type 2 diabetes	Type 2 Diabetes	4e-11	1.12	[1.08-1.16]	rs7754840-C	chr6	20769229	C/G	0.336	0.31	0.3172	0.216	No	Duplicated
	1781	17463248	Scott LJ	Science	Type 2 diabetes	Type 2 Diabetes	4e-11	1.12	[1.08-1.16]	rs7754840-C	chr6	20769229	C/G	0.336	0.36	0.3172	0.216	No	Duplicated
	1782	17460697	Steinthorsdottir V	Nat Genet	Type 2 diabetes	Type 2 Diabetes	8e-09	1.2	[1.13-1.27]	rs7756992-G	chr6	20787688	A/G	0.279	0.26	0.2897	0.244	Yes	-
	1783	17463249	Zeggini E	Science	Type 2 diabetes	Type 2 Diabetes	1e-48	1.37	[1.31-1.43]	rs7901695-C	chr10	114744078	C/T	0.281	NA	0.2276	0.295	Yes	-
	1784	18372903	Zeggini E	Nat Genet	Type 2 diabetes	Type 2 Diabetes	1e-09	1.09	[1.06-1.12]	rs7961581-C	chr12	69949369	C/T	0.252	0.27	0.3669	0.358	Yes	-
	1785	20581827	Voight BF	Nat Genet	Type 2 diabetes	Type 2 Diabetes	2e-10	1.07	[1.05-1.09]	rs8042680-A	chr15	89322341	A/C	0.261	NA	0.5276	0.585	Yes	-
	1786	18372903	Zeggini E	Nat Genet	Type 2 diabetes	Type 2 Diabetes	7e-06	1.15	[1.09-1.22]	rs8050136-A	chr16	52373776	A/C	0.46	NA	0.4161	0.261	No	Duplicated
	1787	17463248	Scott LJ	Science	Type 2 diabetes	Type 2 Diabetes	1e-12	1.17	[1.12-1.22]	rs8050136-A	chr16	52373776	A/C	0.46	0.38	0.4161	0.261	No	Duplicated
	1788	17463249	Zeggini E	Science	Type 2 diabetes	Type 2 Diabetes	7e-14	1.23	[1.18-1.32]	rs8050136-A	chr16	52373776	A/C	0.46	0.4	0.4161	0.261	No	LD to rs9939609
	1789	22158537	Cho YS	Nat Genet	Type 2 diabetes	Type 2 Diabetes	8e-11	1.09	[1.06–1.12]	rs831571-C	chr3	64023337	C/T	0.774	NonEuro	0.8561	0.847	Yes	-
	1790	18372903	Zeggini E	Nat Genet	Type 2 diabetes	Type 2 Diabetes	5e-14	1.1	[1.07-1.13]	rs864745-T	chr7	28147081	C/T	0.487	0.5	0.5764	0.776	Yes	-
	1791	17554300	WTCCC	Nature	Type 2 diabetes	Type 2 Diabetes	3e-07	1.18	[1.04-1.34]	rs9465871-C	chr6	20825234	C/T	0.164	0.18	0.2679	0.222	Yes	-
	1792	18372903	Zeggini E	Nat Genet	Type 2 diabetes	Type 2 Diabetes	4e-06	1.06	[1.04-1.09]	rs9472138-T	chr6	43919740	C/T	0.239	0.28	0.2483	0.227	Yes	-
	1793	17554300	WTCCC	Nature	Type 2 diabetes	Type 2 Diabetes	2e-07	1.34	[1.17-1.52]	rs9939609-A	chr16	52378028	A/T	0.46	0.4	0.412	0.267	Yes	-
	1794	21297633	Anderson CA	Nat Genet	Ulcerative colitis	Other	5e-28	1.74	[1.57-1.92]	rs11209026-G	chr1	67478546	A/G	0.959	0.94	0.94964	0	Yes	-
	1795	20228799	McGovern DP	Nat Genet	Ulcerative colitis	Other	2e-07	1.27	[NR]	rs11584383-T	chr1	199202489	C/T	0.668	NA	0.7931	0.903	Yes	-
	1796	21297633	Anderson CA	Nat Genet	Ulcerative colitis	Other	1e-10	1.07	[1.03-1.11]	rs11676348-T	chr2	218718391	C/T	0.425	0.49	0.5172	0.517	Yes	-
	1797	21297633	Anderson CA	Nat Genet	Ulcerative colitis	Other	3e-08	1.15	[1.09-1.21]	rs11739663-T	chr5	647083	C/T	0.752	0.77	0.6538	0.767	Yes	-
	1798	20228799	McGovern DP	Nat Genet	Ulcerative colitis	Other	2e-10	1.17	[NR]	rs1317209-T	chr1	20012623	A/G	0.137	NA	0.2759	0.21	Yes	-
	1799	19915572	Barrett JC	Nat Genet	Ulcerative colitis	Other	3e-08	1.17	[1.07-1.27]	rs1728785-G	chr16	67148731	A/C	0.836	0.76	0.7606	0.739	Yes	-
	1800	21297633	Anderson CA	Nat Genet	Ulcerative colitis	Other	9e-07	1.12	[1.07-1.17]	rs17388568-A	chr4	123548812	A/G	0.345	0.27	0.3207	0.151	Yes	-
	1801	20228799	McGovern DP	Nat Genet	Ulcerative colitis	Other	1e-13	1.27	[NR]	rs2201841-A	chr1	67466790	A/G	0.704	NA	0.6259	0.386	Yes	-
	1802	21297633	Anderson CA	Nat Genet	Ulcerative colitis	Other	2e-10	1.09	[1.04-1.15]	rs2297441-A	chr20	61798026	A/G	0.752	0.77	0.7353	0.83	Yes	-
	1803	21297633	Anderson CA	Nat Genet	Ulcerative colitis	Other	3e-12	1.09	[1.05-1.14]	rs2310173-T	chr2	102030060	G/T	0.42	0.46	0.3986	0.392	Yes	-
	1804	19122664	Silverberg MS	Nat Genet	Ulcerative colitis	Other	5e-07	1.54		rs2870946-G	chr12	66882928	C/T	0.058	0.055	0.07394	0.051	Yes	-
	1805	21297633	Anderson CA	Nat Genet	Ulcerative colitis	Other	5e-11	1.15	[1.10-1.19]	rs2872507-A	chr17	35294289	A/G	0.473	0.46	0.4655	0.33	Yes	-
	1806	20228798	Franke A	Nat Genet	Ulcerative colitis	Other	1e-12	1.35	[1.22-1.50]	rs3024493-T	chr1	205010591	A/C	0.169	0.16	0.1903	0.19	Yes	-
	1807	21297633	Anderson CA	Nat Genet	Ulcerative colitis	Other	6e-17	1.25	[1.19-1.32]	rs3024505-A	chr1	205006527	A/G	0.181	0.16	0.2188	0.19	Yes	-
	1808	20228799	McGovern DP	Nat Genet	Ulcerative colitis	Other	1e-08	1.23	[NR]	rs3024505-T	chr1	205006527	A/G	0.181	NA	0.2188	0.19	Yes	-
	1809	18836448	Franke A	Nat Genet	Ulcerative colitis	Other	1e-12	1.46	[1.31-1.62]	rs3024505-T	chr1	205006527	A/G	0.181	0.15	0.2188	0.19	Yes	-
	1810	21297633	Anderson CA	Nat Genet	Ulcerative colitis	Other	2e-16	1.2	[1.15-1.26]	rs4510766-A	chr7	107280025	A/G	0.562	0.56	0.6224	0.688	Yes	-
	1811	21297633	Anderson CA	Nat Genet	Ulcerative colitis	Other	2e-08	1.07	[1.03-1.11]	rs4728142-A	chr7	128361203	A/G	0.398	0.44	0.5	0.403	Yes	-
	1812	21297633	Anderson CA	Nat Genet	Ulcerative colitis	Other	1e-20	1.2	[1.15-1.26]	rs6017342-C	chr20	42498442	A/C	0.562	0.54	0.6667	0.603	Yes	-
	1813	19915572	Barrett JC	Nat Genet	Ulcerative colitis	Other	9e-17	1.17	[1.09-1.26]	rs6017342-C	chr20	42498442	A/C	0.562	0.52	0.6667	0.603	Yes	-
	1814	21297633	Anderson CA	Nat Genet	Ulcerative colitis	Other	4e-35	1.3	[1.25-1.35]	rs6426833-A	chr1	20044447	A/G	0.509	0.54	0.6597	0.648	Yes	-
	1815	20228799	McGovern DP	Nat Genet	Ulcerative colitis	Other	2e-21	1.3	[NR]	rs6426833-A	chr1	20044447	A/G	0.509	NA	0.6597	0.648	Yes	-
	1816	19122664	Silverberg MS	Nat Genet	Ulcerative colitis	Other	5e-13	1.37		rs6426833-G	chr1	20044447	A/G	0.491	0.54	0.3403	0.352	Yes	-
	1817	21297633	Anderson CA	Nat Genet	Ulcerative colitis	Other	3e-09	1.08	[1.04-1.12]	rs6451493-T	chr5	40446692	G/T	0.646	0.61	0.5328	0.448	Yes	-
	1818	21297633	Anderson CA	Nat Genet	Ulcerative colitis	Other	8e-21	1.21	[1.16-1.26]	rs6584283-T	chr10	101280291	C/T	0.447	0.47	0.3655	0.352	Yes	-
	1819	20228798	Franke A	Nat Genet	Ulcerative colitis	Other	2e-06	1.22	[1.12-1.32]	rs6584283-T	chr10	101280291	C/T	0.447	0.46	0.3655	0.352	Yes	-
	1820	21297633	Anderson CA	Nat Genet	Ulcerative colitis	Other	1e-08	1.08	[1.03-1.13]	rs6911490-T	chr6	106628720	C/T	0.209	0.21	0.1898	0.064	Yes	-
	1821	21297633	Anderson CA	Nat Genet	Ulcerative colitis	Other	8e-17	1.14	[1.09-1.20]	rs6920220-A	chr6	138048197	A/G	0.165	0.21	0.05435	0.086	Yes	-
	1822	21297633	Anderson CA	Nat Genet	Ulcerative colitis	Other	2e-13	1.1	[1.05-1.16]	rs7524102-A	chr1	22571034	A/G	0.814	0.83	0.8566	0.812	Yes	-
	1823	19915572	Barrett JC	Nat Genet	Ulcerative colitis	Other	3e-07	1.1	[1.00-1.21]	rs7524102-A	chr1	22571034	A/G	0.814	0.83	0.8566	0.812	Yes	-
	1824	21297633	Anderson CA	Nat Genet	Ulcerative colitis	Other	2e-14	1.19	[1.14-1.24]	rs7608910-G	chr2	61058360	A/G	0.379	0.39	0.2536	0.212	Yes	-
	1825	21297633	Anderson CA	Nat Genet	Ulcerative colitis	Other	3e-15	1.13	[1.08-1.18]	rs798502-A	chr7	2756406	A/C	0.712	0.71	0.8947	0.824	Yes	-
	1826	19915572	Barrett JC	Nat Genet	Ulcerative colitis	Other	3e-08	1.11	[1.03-1.19]	rs886774-G	chr7	107282670	A/G	0.414	0.41	0.3287	0.431	Yes	-
	1827	19915573	Asano K	Nat Genet	Ulcerative colitis	Other	3e-06	1.82	[1.43-2.33]	rs9268480-G	chr6	32471822	C/T	0.659	0.91	0.8931	0.767	Yes	-
	1828	21297633	Anderson CA	Nat Genet	Ulcerative colitis	Other	1e-55	1.4	[1.34-1.47]	rs9268853-T	chr6	32537621	C/T	0.575	0.66	0.809	0.688	Yes	-
	1829	18836448	Franke A	Nat Genet	Ulcerative colitis	Other	6e-18	1.45	[1.33-1.58]	rs9268877-T	chr6	32539125	A/G	0.42	0.45	0.5759	0.506	Yes	-
	1830	21297633	Anderson CA	Nat Genet	Ulcerative colitis	Other	4e-12	1.12	[1.07-1.17]	rs941823-C	chr13	39911977	C/T	0.779	0.76	0.8862	0.966	Yes	-
	1831	19915572	Barrett JC	Nat Genet	Ulcerative colitis	Other	3e-07	1.1	[1.03-1.19]	rs9548988-T	chr13	39403510	C/T	0.478	0.46	0.5286	0.621	Yes	-
	1832	21437268	McKay JD	PLoS Genet	Upper aerodigestive tract cancers	Other	1e-08	1.12	[1.08-1.17]	rs1494961-C	chr4	84593504	C/T	0.451	0.49	0.4586	0.419	Yes	-
	1833	21437268	McKay JD	PLoS Genet	Upper aerodigestive tract cancers	Other	9e-17	1.33	[1.25-1.43]	rs971074-G	chr4	100560884	C/T	0.868	NA	0.8657	0.932	Yes	-
	1834	20348956	Kiemeney LA	Nat Genet	Urinary bladder cancer	Other	1e-11	1.24	[1.17-1.32]	rs798766-T	chr4	1704037	C/T	0.199	0.19	0.3586	0.199	Yes	-
	1835	20348956	Kiemeney LA	Nat Genet	Urinary bladder cancer	Other	7e-12	1.21	[1.15-1.28]	rs9642880-T	chr8	128787250	G/T	0.425	0.44	0.4828	0.642	Yes	-
	1836	18794855	Kiemeney LA	Nat Genet	Urinary bladder cancer	Other	9e-12	1.22	[1.15-1.29]	rs9642880-T	chr8	128787250	G/T	0.425	0.45	0.4828	0.642	Yes	-
	1837	21572414	Suhre K	Nat Genet	Urinary metabolites	Other	3e-19	NR	NR	rs17279437-A	chr3	45789098	A/G	0.095	0.115	0.05208	0.011	Yes	-
	1838	21572414	Suhre K	Nat Genet	Urinary metabolites	Other	2e-182	NR	NR	rs37369-T	chr5	35072872	C/T	0.088	0.092	0.2289	0.261	Yes	-
	1839	21572414	Suhre K	Nat Genet	Urinary metabolites	Other	1e-28	NR	NR	rs4921914-C	chr8	18316718	C/T	0.288	0.23	0.1736	0.205	Yes	-
	1840	21572414	Suhre K	Nat Genet	Urinary metabolites	Other	6e-27	NR	NR	rs8101881-C	chr19	38056468	C/T	0.372	0.35	0.4893	0.46	Yes	-
	1841	21572414	Suhre K	Nat Genet	Urinary metabolites	Other	1e-46	NR	NR	rs830124-A	chr12	120880160	A/G	0.124	0.152	0.1724	0.21	Yes	-
	1842	21460842	Cha PC	Nat Genet	Uterine fibroids	Other	9e-14	1.47	[1.23-1.75]	rs7913069-A	chr10	105704389	C/T	0.009	0.07	0.01736	0.04	Yes	-
	1843	21460842	Cha PC	Nat Genet	Uterine fibroids	Other	9e-06	1.15	[1.03-1.28]	rs991964-A	chr2	59136095	C/T	0.549	0.34	0.3688	0.494	Yes	-
	1844	21980494	Germain M	PLoS One	Venous thromboembolism	Other	2e-26	2.52	[NR]	rs1018827-A	chr1	167780630	A/G	0.076	0.12	0.1469	0.085	Yes	-
	1845	21980494	Germain M	PLoS One	Venous thromboembolism	Other	6e-11	1.4	[NR]	rs3756008-T	chr4	187422379	A/T	0.398	0.44	0.3724	0.381	Yes	-
	1846	21076409	Sotoodehnia N	Nat Genet	Ventricular conduction	Other	1e-06	0.44	[NR] ms decrease	rs11710077-T	chr3	38632903	A/T	0.195	0.21	0.2069	0.193	Yes	-
	1847	21076409	Sotoodehnia N	Nat Genet	Ventricular conduction	Other	1e-13	0.69	[0.51-0.87] ms increase	rs1362212-A	chr7	35271831	A/G	0.128	0.18	0.06618	0.071	Yes	-
	1848	21076409	Sotoodehnia N	Nat Genet	Ventricular conduction	Other	8e-09	0.39	[0.25-0.53] ms increase	rs7562790-G	chr2	36527059	G/T	0.372	0.4	0.5909	0.591	Yes	-
	1849	21076409	Sotoodehnia N	Nat Genet	Ventricular conduction	Other	1e-10	0.49	[0.33-0.65] ms increase	rs883079-C	chr12	113277623	C/T	0.248	0.29	0.3601	0.426	Yes	-
	1850	21076409	Sotoodehnia N	Nat Genet	Ventricular conduction	Other	5e-18	0.59	[0.45-0.73] ms decrease	rs9436640-G	chr1	61646265	G/T	0.496	0.46	0.5521	0.568	Yes	-
	1851	21076409	Sotoodehnia N	Nat Genet	Ventricular conduction	Other	1e-08	0.39	[0.25-0.53] ms increase	rs9912468-G	chr17	61748819	C/G	0.469	0.43	0.5931	0.278	Yes	-
	1852	20548946	Ramdas WD	PLoS Genet	Vertical cup-disc ratio	Other	1e-11	0.01	[0.008-0.016] mm2 increase	rs10483727-T	chr14	60142628	C/T	0.379	0.41	0.5845	0.517	Yes	-
	1853	20548946	Ramdas WD	PLoS Genet	Vertical cup-disc ratio	Other	6e-08	0.01	[0.007-0.015] mm2 decrease	rs12025126-C	chr1	8682141	C/T	0.301	0.29	0.1979	0.205	Yes	-
	1854	20548946	Ramdas WD	PLoS Genet	Vertical cup-disc ratio	Other	4e-09	0.01	[0.01-0.02] mm2 decrease	rs17146964-G	chr11	65005721	A/G	0.257	0.2	0.1562	0.102	Yes	-
	1855	20548946	Ramdas WD	PLoS Genet	Vertical cup-disc ratio	Other	2e-08	0.01	[0.009-0.017] mm2 decrease	rs1900004-T	chr10	69670887	C/T	0.208	0.22	0.2797	0.216	Yes	-
	1856	21729881	Major JM	Hum Mol Genet	Vitamin E levels	Other	8e-12	0.04	[0.02-0.06] unit increase	rs964184-G	chr11	116154127	C/G	0.121	0.15	0.1771	0.176	Yes	-
	1857	20410501	Jin Y	N Engl J Med	Vitiligo	Other	1e-09	1.27	[1.18-1.38]	rs11203203-A	chr21	42709255	A/G	0.323	0.373	0.369	0.341	Yes	-
	1858	20410501	Jin Y	N Engl J Med	Vitiligo	Other	2e-18	1.53	[1.39-1.68]	rs1393350-G	chr11	88650694	A/G	0.774	0.733	0.8419	0.886	Yes	-
	1859	20526339	Quan C	Nat Genet	Vitiligo	Other	1e-16	1.2	[1.15-1.25]	rs2236313-T	chr6	167280379	C/T	0.571	0.38	0.375	0.443	Yes	-
	1860	20410501	Jin Y	N Engl J Med	Vitiligo	Other	7e-19	1.42	[1.32-1.54]	rs3806156-T	chr6	32481676	G/T	0.398	0.37	0.3	0.392	Yes	-
	1861	21810271	Antoni G	BMC Med Genet	vWF and FVIII levels	Other	8e-06	0.2	[0.12-0.28] IU/dL increase	rs12344583-G	chr9	135713341	A/G	0.221	0.2	0.269	0.29	Yes	-
	1862	20966902	Croteau-Chonka DC	Obesity (Silver Spring)	Waist circumference	Obesity	7e-06	1.73	[0.98-2.48] cm increase	rs12594515-C	chr15	43772363	C/G	0.442	NonEuro	0.55	0.534	No	Duplicated
	1863	20966902	Croteau-Chonka DC	Obesity (Silver Spring)	Waist circumference	Obesity	5e-06	3.91	[2.24-5.58] cm increase	rs13156607-T	chr5	168832565	C/T	0.363	NonEuro	0.3793	0.386	Yes	-
	1864	20966902	Croteau-Chonka DC	Obesity (Silver Spring)	Waist circumference	Obesity	8e-07	3.66	[2.21-5.11] cm increase	rs1440072-C	chr2	223644982	C/T	0.058	0.06	0.07746	0.062	Yes	-
	1865	20935629	Heid IM	Nat Genet	Waist-hip ratio	Obesity	1e-17	0.03	[NR] unit increase	rs1011731-G	chr1	170613171	A/G	0.405	0.43	0.4746	0.415	Yes	-
	1866	20935629	Heid IM	Nat Genet	Waist-hip ratio	Obesity	1e-24	0.04	[NR] unit increase	rs1055144-T	chr7	25837634	C/T	0.159	0.21	0.2049	0.455	Yes	-
	1867	20935629	Heid IM	Nat Genet	Waist-hip ratio	Obesity	2e-17	0.03	[NR] unit increase	rs1294421-G	chr6	6688148	G/T	0.58	0.61	0.6538	0.5	Yes	-
	1868	20935629	Heid IM	Nat Genet	Waist-hip ratio	Obesity	3e-11	0.03	[NR] unit increase	rs4823006-A	chr22	27781671	A/G	0.588	0.57	0.4103	0.42	Yes	-
	1869	20935629	Heid IM	Nat Genet	Waist-hip ratio	Obesity	4e-10	0.04	[NR] unit increase	rs6784615-T	chr3	52481466	C/T	0.96	0.94	0.95423	0.943	Yes	-
	1870	20935629	Heid IM	Nat Genet	Waist-hip ratio	Obesity	2e-16	0.04	[NR] unit increase	rs6795735-C	chr3	64680405	C/T	0.549	0.59	0.3655	0.267	Yes	-
	1871	20935629	Heid IM	Nat Genet	Waist-hip ratio	Obesity	2e-26	0.05	[NR] unit increase	rs6905288-A	chr6	43866851	A/G	0.575	0.56	0.5069	0.79	Yes	-
	1872	19851299	Johansson A	Obesity (Silver Spring)	Weight	Obesity	9e-06	2.32	[NR] kg increase	rs10972341-G	chr9	35131705	A/G	0.576	0.6	0.5458	0.307	Yes	-
	1873	20966902	Croteau-Chonka DC	Obesity (Silver Spring)	Weight	Obesity	4e-06	1.55	[0.89-2.21] kg increase	rs11108495-T	chr12	95332048	C/T	0.606	NonEuro	0.7049	0.79	Yes	-
	1874	19851299	Johansson A	Obesity (Silver Spring)	Weight	Obesity	7e-08	2.96	[NR] kg decrease	rs12517906-G	chr5	180103425	C/T	0.85	0.85	0.8724	0.153	Yes	-
	1875	20966902	Croteau-Chonka DC	Obesity (Silver Spring)	Weight	Obesity	5e-06	1.71	[0.98-2.44] kg increase	rs12594515-C	chr15	43772363	C/G	0.442	NonEuro	0.55	0.534	Yes	-
	1876	20966902	Croteau-Chonka DC	Obesity (Silver Spring)	Weight	Obesity	1e-06	5.42	[3.22-7.62] kg increase	rs16877106-C	chr4	25012364	C/T	0.969	0.96	0.8931	0.955	Yes	-
	1877	19851299	Johansson A	Obesity (Silver Spring)	Weight	Obesity	8e-06	2.08	[NR] kg increase	rs1816002-G	chr10	72153016	C/T	0.469	0.46	0.4931	0.653	Yes	-
	1878	19851299	Johansson A	Obesity (Silver Spring)	Weight	Obesity	3e-07	2.16	[NR] kg increase	rs1840440-G	chr18	21511184	C/T	0.588	0.61	0.5833	0.727	Yes	-
	1879	19079260	Thorleifsson G	Nat Genet	Weight	Obesity	1e-06	2.71	[1.61-3.81] % SD	rs1973993-C	chr1	96716582	C/T	0.593	0.63	0.5108	0.409	No	LD to rs1555543
	1880	19079260	Thorleifsson G	Nat Genet	Weight	Obesity	2e-07	4	[2.47-5.53] % SD	rs6265-G	chr11	27636492	C/T	0.805	0.85	0.8759	0.841	No	Duplicated
	1881	19079260	Thorleifsson G	Nat Genet	Weight	Obesity	2e-07	3.27	[2.05-4.49] % SD	rs7138803-A	chr12	48533735	A/G	0.345	0.37	0.3556	0.42	No	Duplicated
	1882	19079260	Thorleifsson G	Nat Genet	Weight	Obesity	3e-06	3.5	[2.03-4.97] % SD	rs7481311-T	chr11	27539705	C/T	0.805	0.76	0.8759	0.841	No	LD to rs6265
	1883	19079260	Thorleifsson G	Nat Genet	Weight	Obesity	5e-36	7.05	[5.95-8.15] % SD	rs8050136-A	chr16	52373776	A/C	0.46	0.41	0.4161	0.261	No	Duplicated
	1884	20966902	Croteau-Chonka DC	Obesity (Silver Spring)	Weight	Obesity	2e-06	1.83	[1.08-2.58] kg increase	rs907121-C	chr8	123032396	C/T	0.659	0.57	0.7138	0.648	Yes	-
	1885	21738478	Okada Y	PLoS Genet	White blood cell types	Other	1e-08	0.06	[0.04-0.08] unit increase	rs10147992-G	chr14	24573639	A/G	0.393	0.47	0.4014	0.551	Yes	-
	1886	21738478	Okada Y	PLoS Genet	White blood cell types	Other	2e-12	0.11	[0.08-0.14] unit increase	rs2516399-A	chr6	31589278	A/G	0.885	0.81	0.8517	0.891	Yes	-
	1887	21738478	Okada Y	PLoS Genet	White blood cell types	Other	3e-07	0.06	[0.04-0.08] unit increase	rs546829-A	chr4	75175236	A/T	0.341	0.43	0.3944	0.267	Yes	-
	1888	21738478	Okada Y	PLoS Genet	White blood cell types	Other	6e-06	0.05	[0.03-0.07] unit increase	rs6576878-G	chr1	87477619	A/G	0.23	0.43	0.1897	0.307	Yes	-
	1889	21738478	Okada Y	PLoS Genet	White blood cell types	Other	2e-07	0.07	[0.04-0.10] unit increase	rs7237848-T	chr18	4763110	C/T	0.553	0.33	0.486	0.602	Yes	-
	1890	21104366	Tan L	Sci China Life Sci	Wrist bone mass	Other	5e-16	NR	NR	rs11023787-T	chr11	15908870	C/T	0.075	0.04	0.08803	0.188	Yes	-
