# Supplementary material
Source: publisher figshare collection journal article supplement (https://karger.figshare.com/articles/dataset/_/4747918)
Supplement: Supplementary file 6 [file 1 › HHE_201311002_1_11.xlsx]

## Sheet: Supplementary Table 2
		Supplementary Table 2. Differences in RAF among populations using European RAF from the GWAS Catalog
		A) Evidence from the 102 SNPs for which the European RAF is available at the Catalog
		Disease/	SNP	Average RAF			Test of differences in RAF
		Trait		Europe	Europe	India	∆R_E	∆ R_I	∆ I_E
				Roma	Non-Roma
		Coronary	30	0.565	0.549	0.546	0.016	0.019	-0.003
		Artery Dis.					(P=0.25)	(P=0.45)	(P=0.39)
		Type 2	12	0.415	0.377	0.43	0.038	-0.015	0.053
		Diabetes					(P=0.11)	(P=0.79)	(P=0.07)
		Trigly-	14	0.386	0.353	0.353	0.033	0.033	0
		cerides					(P=0.13)	(P=0.31)	(P=0.42)
		Insulin response	5	0.698	0.66	0.784	0.038	-0.086	0.124
							(P=0.20)	(P=0.97)	(P=0.02)
		Obesity	41	0.532	0.54	0.506	-0.008	0.026	-0.034
							(P=0.81)	(P=0.33)	(P=0.79)
		All combined	102	0.516039	0.503686	0.501451	0.012	0.015	-0.002
							(P=0.22)	(P=0.57)	(P=0.26)
		B) Evidence for the same 102 SNPs above but using the European RAF from HapMap CEU
		Disease/	SNP	Average RAF			Test of differences in RAF
		Trait		Europe	Europe	India	∆R_E	∆ R_I	∆ I_E
				Roma	Non-Roma
		Coronary	30	0.565	0.545	0.546	0.02	0.019	0.001
		Artery Dis.					(P=0.19)	(P=0.44)	(P=0.33)
		Type 2	12	0.415	0.379	0.43	0.036	-0.015	0.051
		Diabetes					(P=0.13)	(P=0.78)	(P=0.08)
		Trigly-	14	0.386	0.351	0.353	0.035	0.033	0.002
		cerides					(P=0.11)	(P=0.30)	(P=0.39)
		Insulin response	5	0.698	0.633	0.784	0.065	-0.086	0.151
							(P=0.08)	(P=0.97)	(P=0.01)
		Obesity	41	0.532	0.544	0.506	-0.012	0.026	-0.038
							(P=0.87)	(P=0.34)	(P=0.82)
		All combined	102	0.516039	0.502755	0.501451	0.013	0.015	-0.001
							(P=0.19)	(P=0.56)	(P=0.24)
