# Supplementary material
Source: publisher figshare collection journal article supplement (https://karger.figshare.com/articles/dataset/_/4747918)

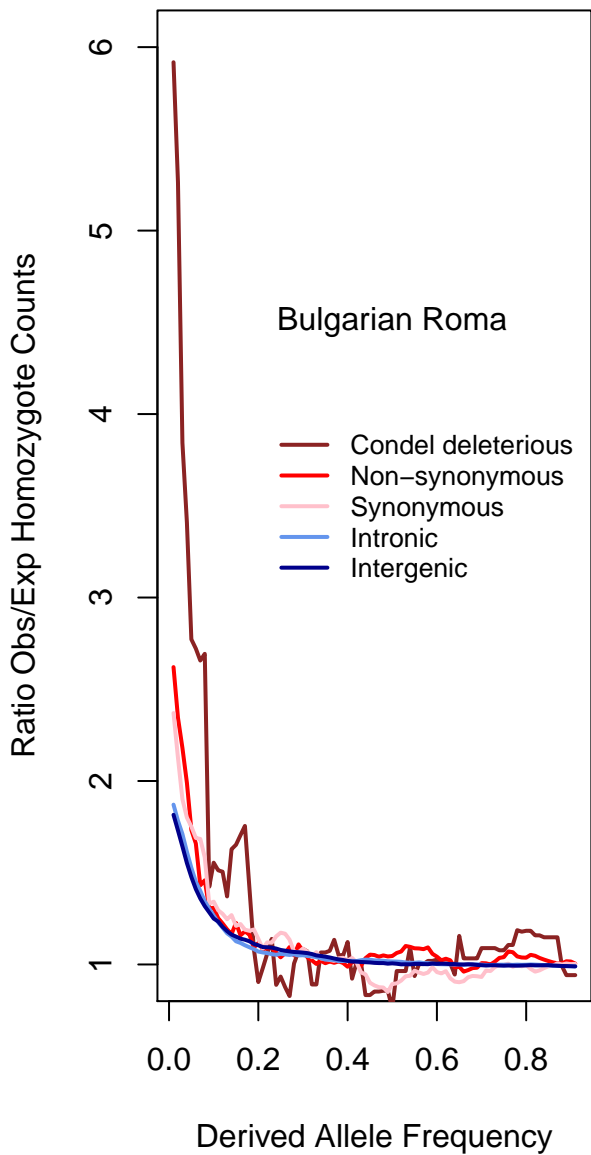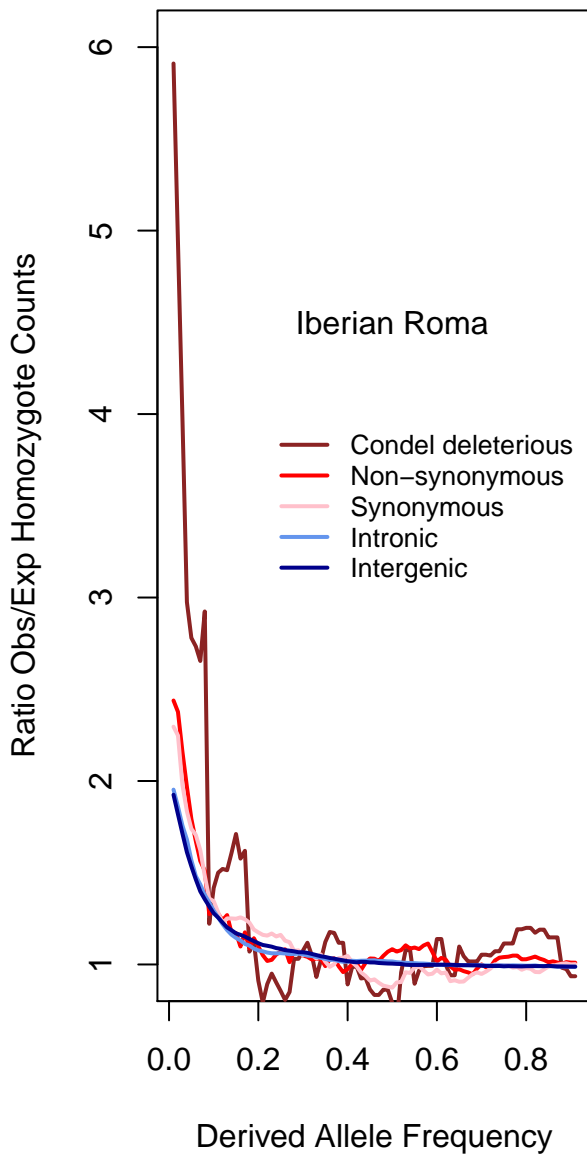

Supplement: Supplementary file 1 [file 1]

RAF from original GWAS

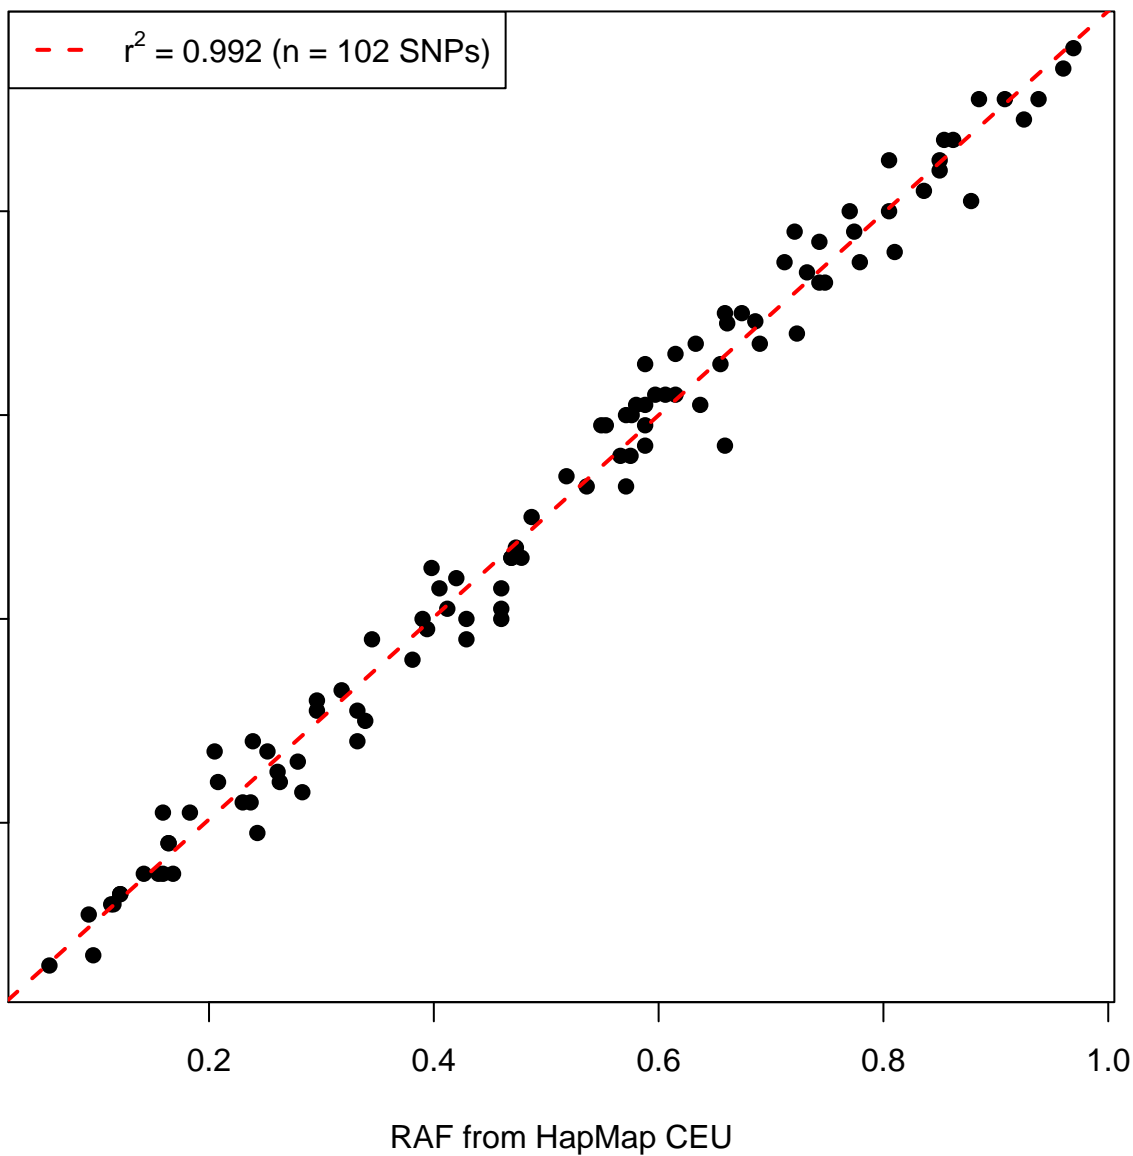

Supplement: Supplementary file 3 [file 1]

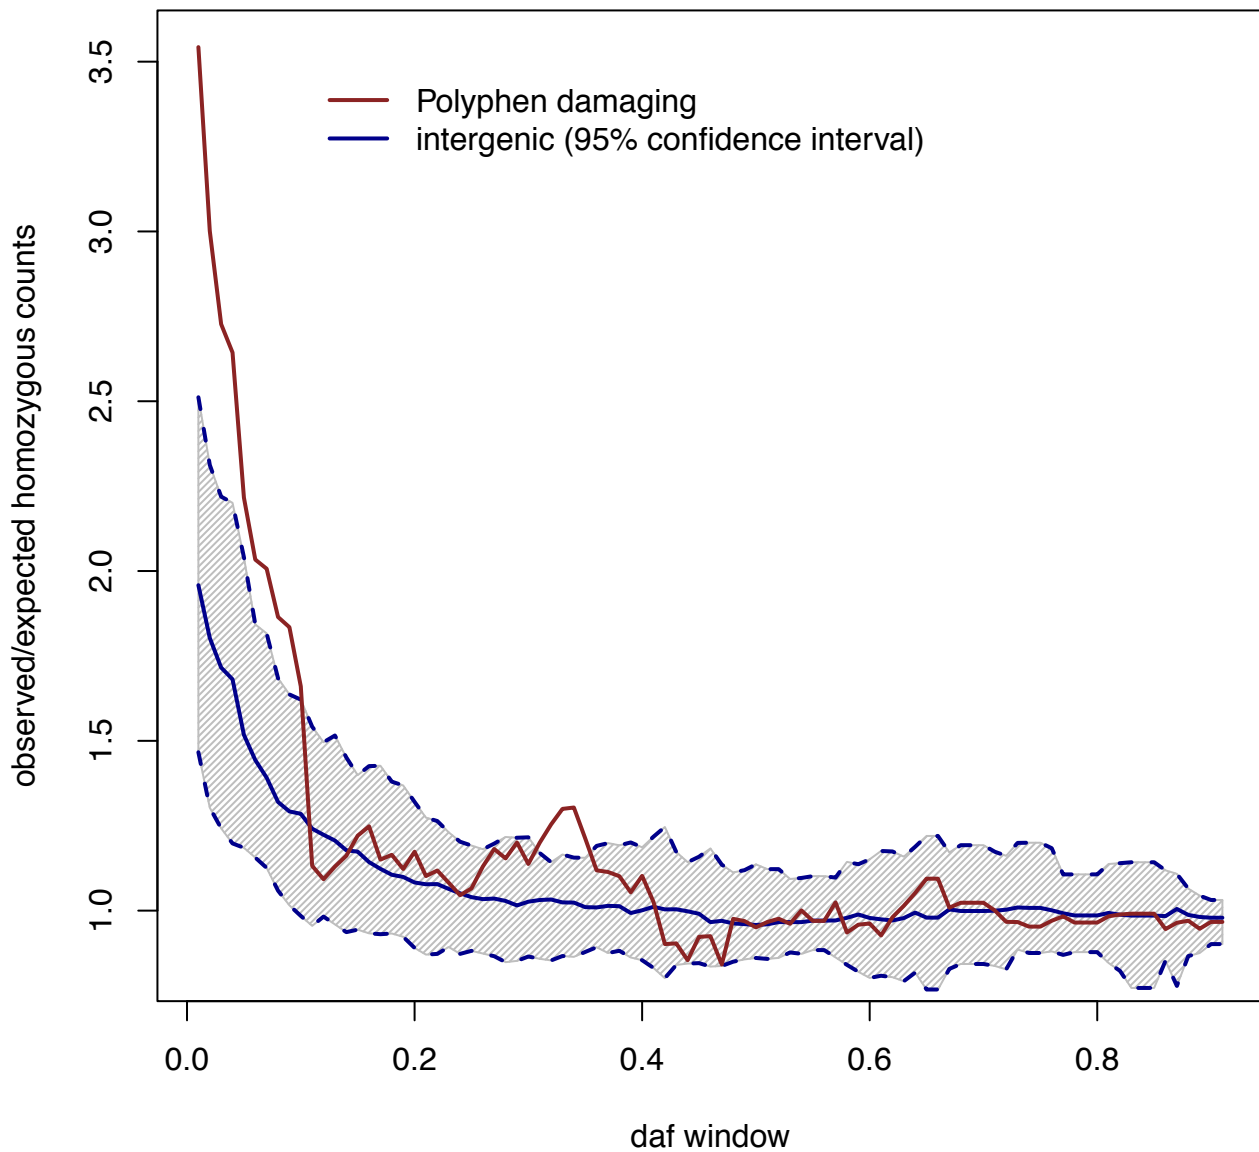

Supplement: Supplementary file 4 [file 1]

## Romani – Parentals: GIH, CEU

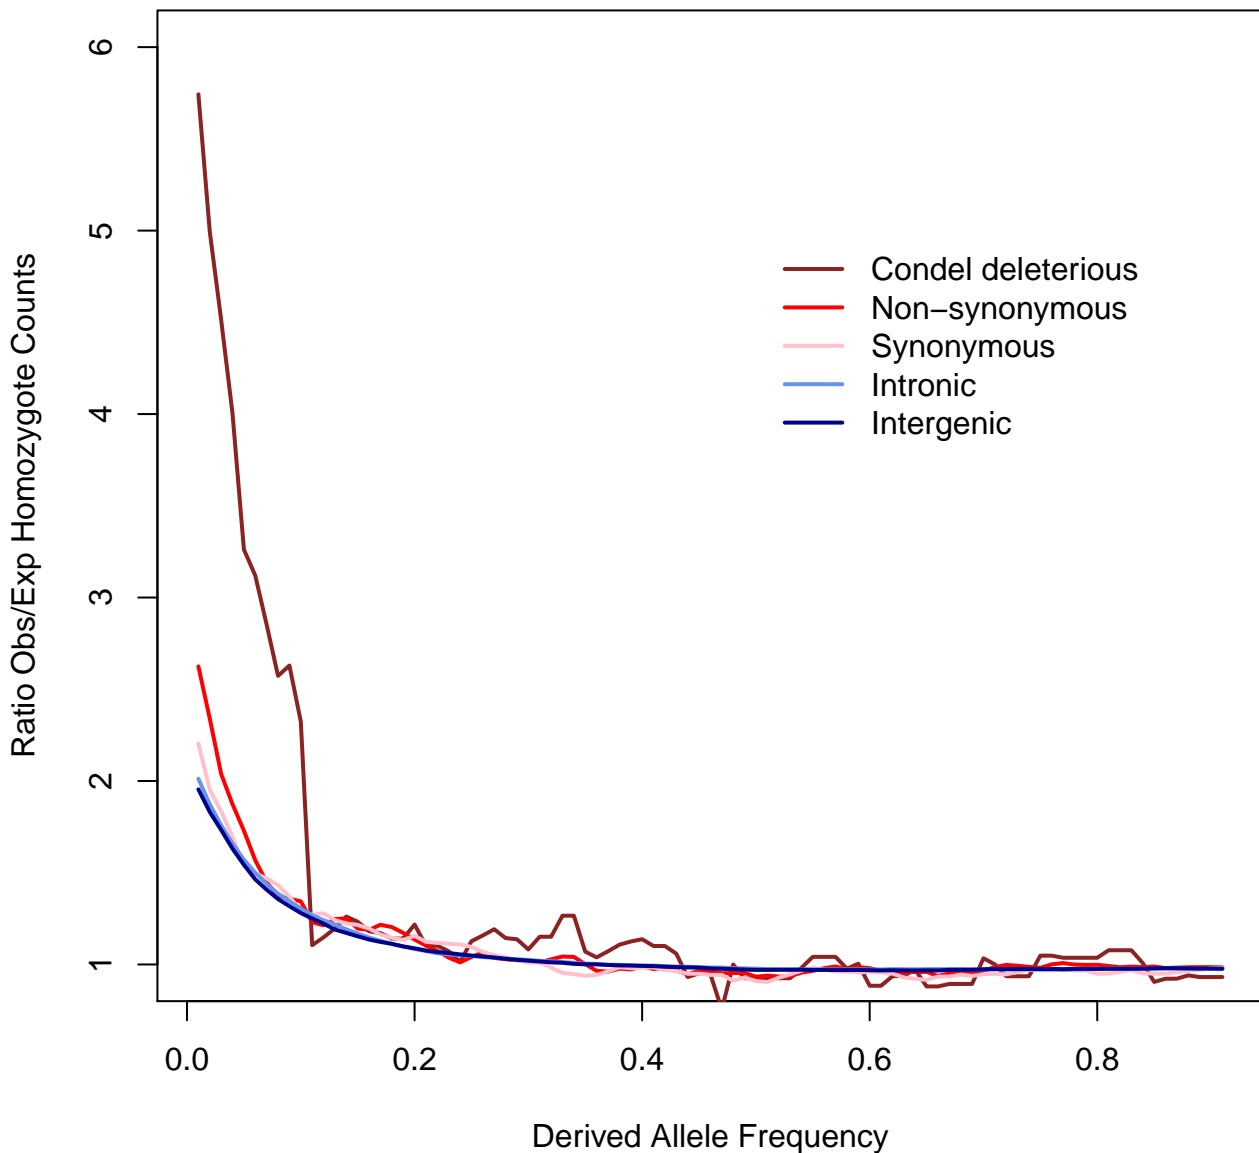

Supplement: Supplementary file 6 [file 1 › Fig.1S.pdf]

Ratio Obs/Exp Homozygote Counts

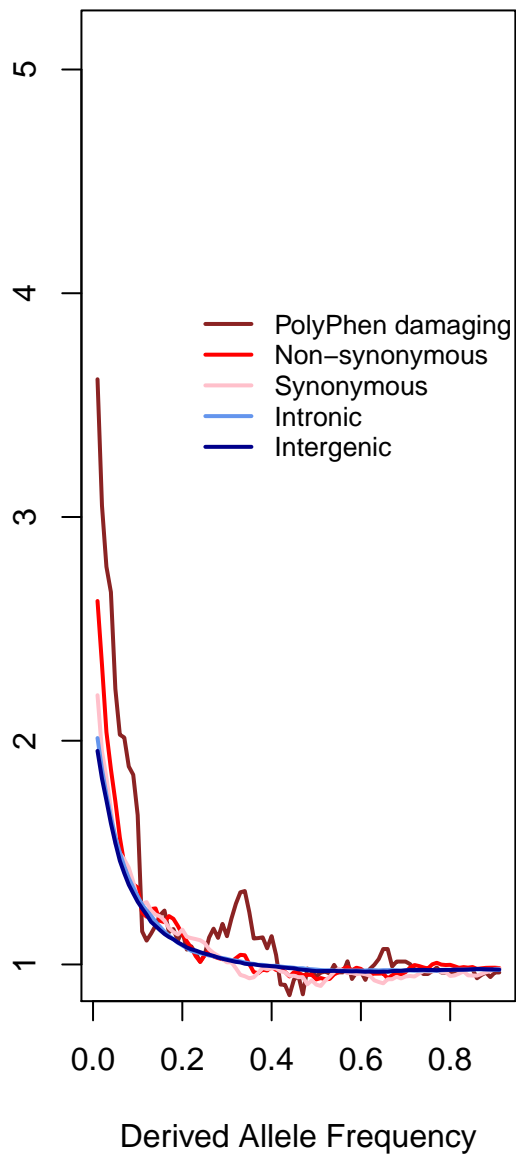

Ratio Obs/Exp Homozygote Counts

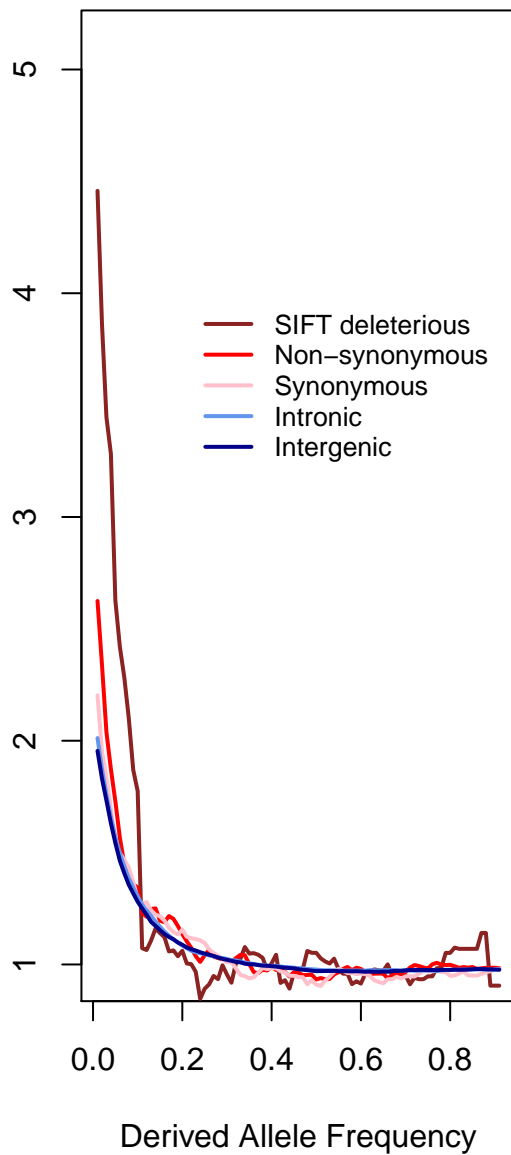

Supplement: Supplementary file 6 [file 1 › Fig.3S.pdf]

Obs vs Exp(DAFMIX+HWE)

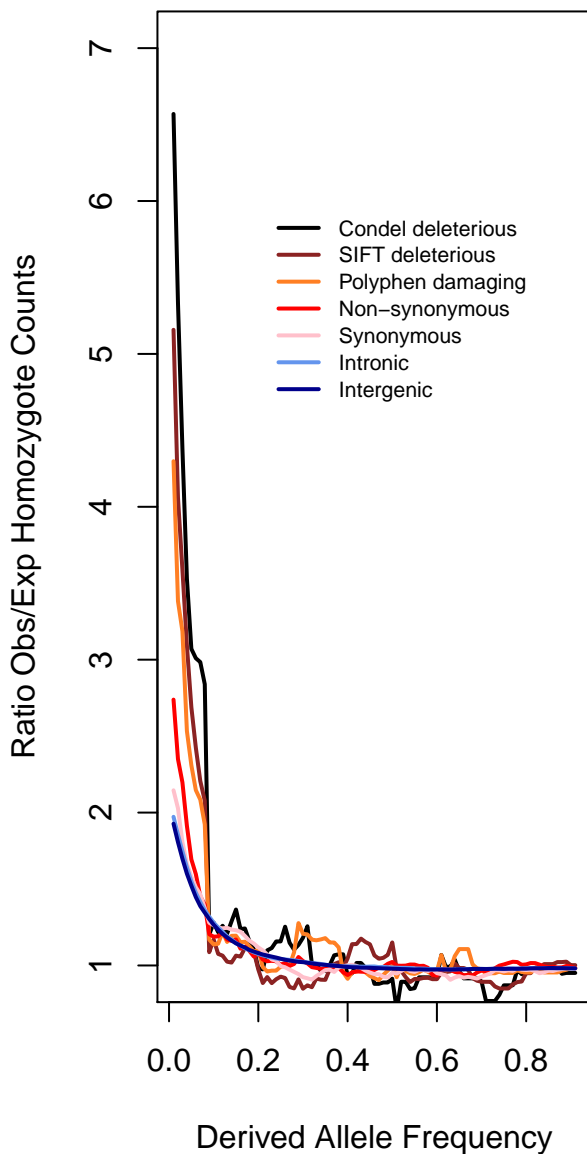

Obs vs Exp(DAFOBS+HWE)

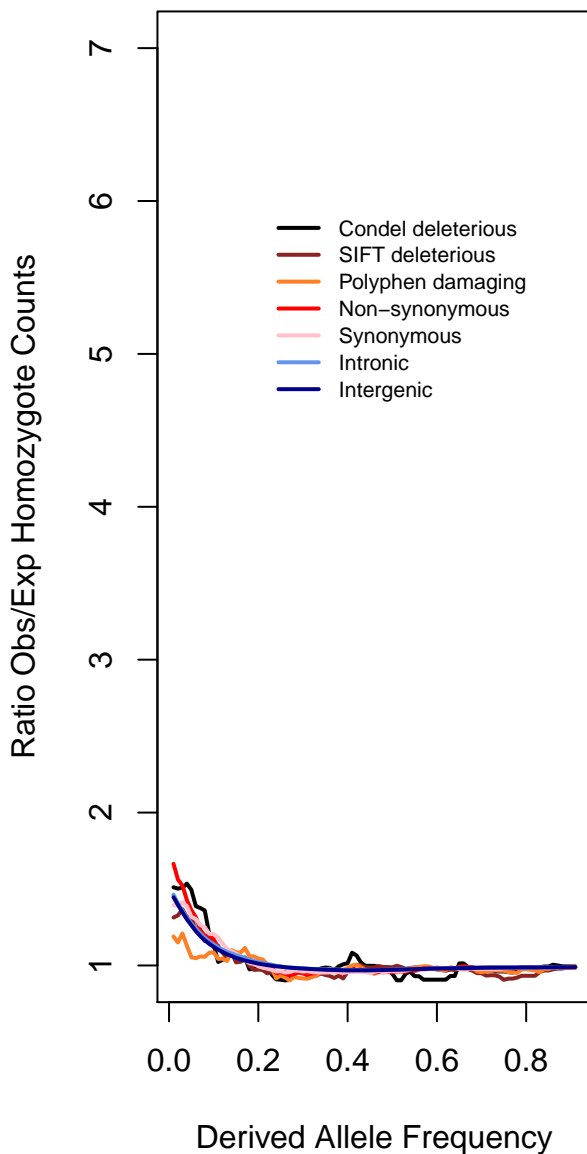

Supplement: Supplementary file 6 [file 1 › Fig.5S.pdf]
